# Supplementary material for: ChiCMaxima: a robust and simple pipeline for detection and visualization of chromatin looping in Capture Hi-C
Source: Genome Biol. 2019 May 22;20:102. doi: 10.1186/s13059-019-1706-3 (PMC6532271; doi:10.1186/s13059-019-1706-3)
Supplement: Supplementary file 6 — Table S5. List of human erythroblast interactions called by ChiCMaxima from three CHi-C replicates. (XLSX 2329 kb) [file 13059_2019_1706_MOESM6_ESM.xlsx]

## Sheet: S5 Ery CHi-C
Table S5. List of human erythroblast interactions called by ChiCMaxima from three CHi-C replicates
ID_Bait	chr_Bait	start_Bait	end_Bait	Bait_name	chr_OE	start_OE	end_OE	N.1	N.2	N.3	N.mean
206254	chr13	101241374	101243366	A2LD1	chr13	100273207	100290115	6	6	7	6.33333
206254	chr13	101241374	101243366	A2LD1	chr13	101247558	101252016	310	187	420	305.667
206254	chr13	101241374	101243366	A2LD1	chr13	101766494	101780725	11	6	11	9.33333
144108	chr12	9268746	9269882	A2M	chr12	9272082	9279207	597	170	241	336
144042	chr12	8983123	8986825	A2ML1-AS1	chr12	8993917	9002538	255	192	301	249.333
144039	chr12	8972319	8975489	A2ML1-AS2	chr12	8986826	9001634	192	166	102	153.333
144039	chr12	8972319	8975489	A2ML1-AS2	chr12	9191782	9208759	28	19	17	21.3333
435232	chr22	43104727	43123445	A4GALT	chr22	43138227	43140604	60	29	31	40
157379	chr12	53718188	53721565	AAAS	chr12	53732141	53734417	508	279	374	387
178672	chr12	125541824	125553041	AACS	chr12	125535648	125541134	354	234	119	235.667
482073	chr3	151521668	151531842	AADAC	chr3	151534342	151534849	163	81	106	116.667
2535	chr1	12773296	12776419	AADACL3	chr1	12383114	12397199	10	6	4	6.66667
2535	chr1	12773296	12776419	AADACL3	chr1	12759464	12770050	85	34	23	47.3333
549068	chr4	171010864	171015572	AADAT	chr4	170723162	170730855	99	33	23	51.6667
549068	chr4	171010864	171015572	AADAT	chr4	171005946	171009144	419	277	172	289.333
397048	chr2	219134749	219135860	AAMP	chr2	220091120	220102485	15	15	11	13.6667
273743	chr16	70313654	70325070	AARS	chr16	69397528	69416185	12	4	5	7
273743	chr16	70313654	70325070	AARS	chr16	70331538	70332963	1126	605	564	765
622804	chr6	44279450	44288287	AARS2	chr6	44272756	44277380	845	308	288	480.333
287787	chr17	41128312	41133939	AARSD1	chr17	41121005	41127488	189	107	130	142
512394	chr4	57252367	57255776	AASDH	chr4	56402828	56411144	13	12	10	11.6667
512394	chr4	57252367	57255776	AASDH	chr4	56808171	56818528	61	34	31	42
512394	chr4	57252367	57255776	AASDH	chr4	57248161	57250022	1120	706	571	799
133220	chr11	105941458	105949844	AASDHPPT	chr11	107305968	107314541	3	2	2	2.33333
696784	chr7	121780190	121788483	AASS	chr7	121794760	121795919	165	90	141	132
286520	chr17	35302066	35318402	AATF	chr17	35001424	35015343	15	10	24	16.3333
297335	chr17	79137855	79146085	AATK-AS1	chr17	79146249	79149643	74	52	31	52.3333
235738	chr14	106650092	106664716	AB019440.1	chr14	106665101	106667311	124	71	148	114.333
260602	chr16	8757589	8780880	ABAT	chr16	8782154	8782995	159	113	95	122.333
143599	chr12	7260342	7262367	ABC12-49244600F4.3	chr12	7254411	7256158	985	576	608	723
143599	chr12	7260342	7262367	ABC12-49244600F4.3	chr12	7775692	7790687	33	28	12	24.3333
776826	chr9	107684509	107694252	ABCA1	chr9	107680051	107683097	308	208	209	241.667
776826	chr9	107684509	107694252	ABCA1	chr9	107909741	107921224	43	37	38	39.3333
776826	chr9	107684509	107694252	ABCA1	chr9	108175593	108182836	25	29	22	25.3333
294576	chr17	67240575	67245534	ABCA10	chr17	66523865	66540116	11	12	10	11
294576	chr17	67240575	67245534	ABCA10	chr17	66768261	66772891	83	57	43	61
294576	chr17	67240575	67245534	ABCA10	chr17	66903133	66911439	12	6	13	10.3333
294576	chr17	67240575	67245534	ABCA10	chr17	67237706	67249550	202	135	110	149
396091	chr2	215996772	216005331	ABCA12	chr2	216010023	216012222	152	90	115	119
259131	chr16	2388413	2395050	ABCA3	chr16	2401646	2406104	463	254	256	324.333
25311	chr1	94584058	94587741	ABCA4	chr1	94576598	94581355	371	246	98	238.333
294607	chr17	67321593	67325780	ABCA5	chr17	66513178	66520089	8	5	8	7
294607	chr17	67321593	67325780	ABCA5	chr17	66768261	66768419	13	9	6	9.33333
294607	chr17	67321593	67325780	ABCA5	chr17	67316605	67320760	199	214	235	216
294547	chr17	67137035	67148210	ABCA6	chr17	66775417	66781365	29	14	12	18.3333
294547	chr17	67137035	67148210	ABCA6	chr17	67149791	67157950	507	146	319	324
294502	chr17	66946677	66957316	ABCA8	chr17	66940902	66945724	95	87	78	86.6667
294525	chr17	67053971	67060673	ABCA9	chr17	66768420	66781365	35	30	17	27.3333
294525	chr17	67053971	67060673	ABCA9	chr17	67062538	67067519	510	367	276	384.333
294512	chr17	66999518	67013082	ABCA9-AS1	chr17	67015388	67019844	171	111	77	119.667
58705	chr1	229692817	229697283	ABCB10	chr1	229407838	229416318	55	23	24	34
58705	chr1	229692817	229697283	ABCB10	chr1	230420751	230428817	36	13	23	24
381459	chr2	169881986	169889602	ABCB11	chr2	169630557	169646339	23	11	9	14.3333
381459	chr2	169881986	169889602	ABCB11	chr2	169879977	169880779	721	426	441	529.333
381459	chr2	169881986	169889602	ABCB11	chr2	171232345	171248088	3	3	4	3.33333
686356	chr7	87109481	87112603	ABCB4	chr7	87098329	87101262	91	41	86	72.6667
667588	chr7	20639530	20655362	ABCB5	chr7	19782491	19791770	26	10	20	18.6667
667588	chr7	20639530	20655362	ABCB5	chr7	20355910	20363657	8	7	10	8.33333
397249	chr2	220077689	220091102	ABCB6	chr2	220091120	220091727	87	66	59	70.6667
262399	chr16	16029025	16052541	ABCC1	chr16	16072438	16076224	81	31	59	57
267603	chr16	48189744	48200897	ABCC12	chr16	47166493	47184281	16	13	12	13.6667
267603	chr16	48189744	48200897	ABCC12	chr16	48189342	48189720	126	101	103	110
92879	chr10	101526826	101552246	ABCC2	chr10	101556338	101557602	277	194	201	224
204753	chr13	95951787	95955271	ABCC4	chr13	95959827	95960170	440	300	225	321.667
492332	chr3	183733408	183737933	ABCC5	chr3	183729356	183732342	626	525	391	514
492325	chr3	183724060	183724316	ABCC5-AS1	chr3	183725921	183732342	1118	657	363	712.667
148149	chr12	22090571	22104163	ABCC9	chr12	22084772	22089783	144	81	46	90.3333
153554	chr12	40010935	40014886	ABCD2	chr12	40005682	40008751	248	207	165	206.667
25405	chr1	94876094	94886259	ABCD3	chr1	94351249	94360129	14	5	4	7.66667
25405	chr1	94876094	94886259	ABCD3	chr1	94501256	94518109	16	17	10	14.3333
25405	chr1	94876094	94886259	ABCD3	chr1	94872649	94875510	161	91	101	117.667
227087	chr14	74768726	74798920	ABCD4	chr14	74763705	74765410	192	151	118	153.667
541105	chr4	146015816	146020399	ABCE1	chr4	145092725	145099535	40	10	21	23.6667
541105	chr4	146015816	146020399	ABCE1	chr4	145253071	145267309	12	3	12	9
541105	chr4	146015816	146020399	ABCE1	chr4	146021133	146032828	429	260	153	280.667
541105	chr4	146015816	146020399	ABCE1	chr4	146418290	146418606	46	27	15	29.3333
619553	chr6	30534753	30541639	ABCF1	chr6	30529805	30532963	18	12	11	13.6667
705223	chr7	150923041	150936379	ABCF2	chr7	150905888	150921408	159	113	116	129.333
705223	chr7	150923041	150936379	ABCF2	chr7	151215277	151215437	18	10	18	15.3333
522588	chr4	89150699	89153356	ABCG2	chr4	89140489	89150231	265	160	59	161.333
522588	chr4	89150699	89153356	ABCG2	chr4	89420731	89428486	54	20	12	28.6667
137048	chr11	119008735	119023006	ABCG4	chr11	119004390	119005164	345	208	212	255
344667	chr2	44064966	44069810	ABCG5	chr2	44057255	44073401	363	185	296	281.333
339740	chr2	27346267	27348910	ABHD1	chr2	27344914	27355885	301	110	99	170
470002	chr3	111695488	111699177	ABHD10	chr3	111693619	111695423	572	428	369	456.333
470002	chr3	111695488	111699177	ABHD10	chr3	112262318	112270040	10	10	10	10
470002	chr3	111695488	111699177	ABHD10	chr3	112699723	112710508	5	5	6	5.33333
410775	chr20	25366671	25376452	ABHD12	chr20	24970788	24986884	7	6	5	6
410775	chr20	25366671	25376452	ABHD12	chr20	25354440	25359281	56	32	35	41
220028	chr14	51338682	51347442	ABHD12B	chr14	50629197	50648616	5	4	7	5.33333
452122	chr3	52002602	52010820	ABHD14A	chr3	51431154	51432015	14	4	4	7.33333
452122	chr3	52002602	52010820	ABHD14A	chr3	52018536	52025403	126	71	62	86.3333
284587	chr17	27890004	27894879	ABHD15	chr17	27897714	27902713	403	201	226	276.667
255166	chr15	89621638	89633335	ABHD2	chr15	89615148	89616023	488	314	206	336
302448	chr18	19275306	19287427	ABHD3	chr18	19260661	19261000	9	10	9	9.33333
211271	chr14	23062238	23067559	ABHD4	chr14	23057021	23076302	204	117	104	141.667
450170	chr3	43724212	43735506	ABHD5	chr3	43737595	43737896	242	173	53	156
72175	chr10	27148168	27151789	ABI1	chr10	27018727	27027887	57	31	41	43
72175	chr10	27148168	27151789	ABI1	chr10	27133500	27138628	124	78	88	96.6667
289143	chr17	47286829	47292714	ABI3	chr17	47292854	47294205	299	192	112	201
466450	chr3	100709288	100714790	ABI3BP	chr3	100715861	100716522	245	220	243	236
783706	chr9	133576743	133589751	ABL1	chr9	133571873	133574272	813	457	328	532.667
783706	chr9	133576743	133589751	ABL1	chr9	133734712	133737674	187	105	99	130.333
43789	chr1	179196747	179205715	ABL2	chr1	179212634	179216318	75	45	35	51.6667
97255	chr10	116442134	116447410	ABLIM1	chr10	116315579	116323082	89	47	43	59.6667
97255	chr10	116442134	116447410	ABLIM1	chr10	116447894	116448243	371	245	225	280.333
498162	chr4	8152403	8167281	ABLIM2	chr4	8167399	8171790	91	53	82	75.3333
601171	chr5	148520758	148526858	ABLIM3	chr5	147808355	147826110	4	6	5	5
601171	chr5	148520758	148526858	ABLIM3	chr5	148514266	148530171	192	108	68	122.667
601171	chr5	148520758	148526858	ABLIM3	chr5	148639234	148646685	20	24	21	21.6667
705148	chr7	150512976	150523919	ABP1	chr7	150142712	150152678	29	12	26	22.3333
705148	chr7	150512976	150523919	ABP1	chr7	150531544	150544096	161	118	193	157.333
618422	chr6	26593067	26601342	ABT1	chr6	26329836	26331257	59	38	36	44.3333
618422	chr6	26593067	26601342	ABT1	chr6	26585900	26592477	404	204	205	271
618422	chr6	26593067	26601342	ABT1	chr6	27447028	27455330	8	8	6	7.33333
618422	chr6	26593067	26601342	ABT1	chr6	27716578	27732725	8	4	3	5
474738	chr3	127388664	127399743	ABTB1	chr3	127377634	127381578	288	145	158	197
474738	chr3	127388664	127399743	ABTB1	chr3	127678848	127692647	46	12	29	29
112583	chr11	34376256	34385647	ABTB2	chr11	34190234	34202435	146	53	73	90.6667
112583	chr11	34376256	34385647	ABTB2	chr11	34373504	34374832	481	293	271	348.333
280782	chr17	9972695	9976981	AC000003.1	chr17	9957263	9968581	361	182	296	279.667
432240	chr22	29869289	29877404	AC000035.3	chr22	29867494	29868297	237	137	125	166.333
698469	chr7	126848723	126855584	AC000099.1	chr7	126843445	126862996	294	191	294	259.667
695317	chr7	117203158	117205915	AC000111.3	chr7	117206606	117211196	219	156	96	157
695349	chr7	117286445	117296105	AC000111.6	chr7	117280198	117283514	92	61	82	78.3333
698507	chr7	126990132	126991379	AC000123.4	chr7	127002000	127009455	300	271	208	259.667
698507	chr7	126990132	126991379	AC000123.4	chr7	127828665	127844929	18	16	10	14.6667
698178	chr7	126018517	126019314	AC000370.2	chr7	126019574	126025751	291	328	231	283.333
687206	chr7	89837043	89842338	AC002064.3	chr7	89842558	89857641	6	9	5	6.66667
687229	chr7	89899258	89899670	AC002064.4	chr7	89894613	89906202	315	204	376	298.333
687229	chr7	89899258	89899670	AC002064.4	chr7	90041979	90053319	31	13	12	18.6667
177557	chr12	120017868	120022164	AC002070.1	chr12	120023095	120030686	199	165	148	170.667
688395	chr7	93518811	93526004	AC002076.10	chr7	93526395	93528212	264	152	137	184.333
688395	chr7	93518811	93526004	AC002076.10	chr7	93703539	93714973	59	18	43	40
688395	chr7	93518811	93526004	AC002076.10	chr7	94025004	94026196	19	9	27	18.3333
288176	chr17	43236773	43275660	AC002117.1	chr17	43228752	43232530	287	198	123	202.667
265933	chr16	30583431	30599062	AC002310.7	chr16	30603111	30606537	155	86	62	101
265135	chr16	26655086	26667187	AC002331.1	chr16	26670393	26670939	129	108	78	105
787483	chrX	9935188	9945849	AC002365.1	chrX	9949758	9950242	76	38	38	50.6667
828153	chrX	147579628	147584803	AC002368.4	chrX	147586040	147587569	241	160	120	173.667
688808	chr7	94843257	94846649	AC002429.5	chr7	94832589	94842106	192	121	95	136
688041	chr7	92460612	92467461	AC002454.1	chr7	92629059	92639372	33	20	13	22
688041	chr7	92460612	92467461	AC002454.1	chr7	92849757	92858833	17	12	5	11.3333
687340	chr7	90224880	90229044	AC002456.2	chr7	90222605	90223075	378	267	246	297
695228	chr7	116938738	116942637	AC002465.2	chr7	116932236	116946534	310	94	186	196.667
629404	chr6	67067857	67072058	AC002485.1	chr6	67059430	67062000	89	60	84	77.6667
327641	chr19	35903842	35921173	AC002511.2	chr19	35922293	35929272	233	225	205	221
327644	chr19	35923942	35924938	AC002511.3	chr19	35929273	35933645	457	220	208	295
294839	chr17	68117083	68127423	AC002539.1	chr17	68127734	68128814	124	67	76	89
282513	chr17	15942879	15950350	AC002553.1	chr17	15941023	15941565	545	403	354	434
288653	chr17	45183304	45196211	AC002558.1	chr17	45196419	45204642	9	8	6	7.66667
175411	chr12	111505356	111513903	AC002978.1	chr12	111499160	111501966	412	210	333	318.333
175469	chr12	111723835	111753943	AC002979.1	chr12	111722246	111722424	297	175	383	285
788191	chrX	12164417	12166833	AC002981.1	chrX	12163709	12164064	33	42	17	30.6667
693438	chr7	111446838	111456213	AC003077.1	chr7	111456846	111458915	286	302	154	247.333
789043	chrX	14781673	14783307	AC003658.1	chrX	14777744	14786672	221	145	135	167
288831	chr17	46017787	46020845	AC003665.1	chr17	46024514	46029316	238	97	133	156
787561	chrX	10183841	10190318	AC003666.1	chrX	10181451	10183187	388	399	215	334
331781	chr19	58070618	58071857	AC003682.1	chr19	58077186	58081824	465	250	200	305
287465	chr17	39556895	39559653	AC003958.2	chr17	39561754	39566988	264	129	188	193.667
698064	chr7	125677124	125681676	AC003968.1	chr7	125682769	125685944	192	131	134	152.333
667078	chr7	19149889	19152619	AC003986.6	chr7	18391696	18400633	17	7	5	9.66667
667078	chr7	19149889	19152619	AC003986.6	chr7	19139139	19154063	634	127	308	356.333
667078	chr7	19149889	19152619	AC003986.6	chr7	19692953	19702070	23	6	17	15.3333
668903	chr7	24940241	24944765	AC004016.1	chr7	24608143	24620039	7	3	4	4.66667
668903	chr7	24940241	24944765	AC004016.1	chr7	24946896	24950375	337	157	280	258
331816	chr19	58201503	58211052	AC004017.1	chr19	58668406	58679606	10	8	6	8
523546	chr4	92022003	92034865	AC004054.1	chr4	92035384	92043277	123	62	56	80.3333
528211	chr4	106470817	106473904	AC004066.3	chr4	106464467	106481293	390	173	172	245
528089	chr4	106098019	106101391	AC004069.3	chr4	106106436	106107953	192	140	139	157
528089	chr4	106098019	106101391	AC004069.3	chr4	106377359	106382876	30	12	26	22.6667
669601	chr7	27143269	27156411	AC004080.12	chr7	25932772	25939578	6	6	11	7.66667
669601	chr7	27143269	27156411	AC004080.12	chr7	26414225	26428725	20	7	6	11
669601	chr7	27143269	27156411	AC004080.12	chr7	26902412	26905527	32	14	17	21
669601	chr7	27143269	27156411	AC004080.12	chr7	27158218	27164725	294	109	344	249
664555	chr7	11446419	11448376	AC004160.4	chr7	11451669	11454857	282	180	199	220.333
287335	chr17	39072966	39081007	AC004231.2	chr17	39470113	39485945	42	24	18	28
596414	chr5	132021077	132026796	AC004237.1	chr5	132010405	132020752	303	353	182	279.333
695362	chr7	117326533	117332208	AC004240.2	chr7	117112125	117119359	20	14	16	16.6667
695362	chr7	117326533	117332208	AC004240.2	chr7	117336768	117337956	449	263	325	345.667
263590	chr16	20809499	20832372	AC004381.6	chr16	20834034	20838377	295	240	190	241.667
263590	chr16	20809499	20832372	AC004381.6	chr16	21092789	21109982	51	11	28	30
689210	chr7	96097482	96097899	AC004458.1	chr7	95708779	95717041	29	14	17	20
689210	chr7	96097482	96097899	AC004458.1	chr7	96102328	96105818	327	201	217	248.333
668717	chr7	24292338	24302526	AC004485.3	chr7	24289667	24291641	30	14	11	18.3333
691985	chr7	106932849	106935805	AC004492.1	chr7	106926342	106943819	123	72	68	87.6667
669365	chr7	26414940	26426318	AC004540.4	chr7	25918726	25936200	31	23	25	26.3333
669365	chr7	26414940	26426318	AC004540.4	chr7	26428726	26435210	146	83	117	115.333
669365	chr7	26414940	26426318	AC004540.4	chr7	26695958	26715482	69	28	24	40.3333
669365	chr7	26414940	26426318	AC004540.4	chr7	27201207	27207966	41	24	38	34.3333
670274	chr7	29244468	29248959	AC004593.3	chr7	28967121	28974978	16	14	12	14
791573	chrX	23138197	23142068	AC004673.1	chrX	23130919	23149885	257	127	128	170.667
670744	chr7	30839356	30845759	AC004691.5	chr7	30835243	30839327	250	165	222	212.333
670744	chr7	30839356	30845759	AC004691.5	chr7	31156368	31160121	31	14	16	20.3333
674504	chr7	43285149	43293141	AC004692.4	chr7	43282105	43282592	459	364	482	435
667002	chr7	18936264	18939440	AC004744.3	chr7	18925423	18945019	93	124	200	139
689476	chr7	96919479	96921456	AC004745.1	chr7	96914197	96916447	316	306	164	262
322833	chr19	16122752	16134790	AC004790.1	chr19	16115279	16121309	44	31	45	40
673397	chr7	39649880	39651654	AC004837.4	chr7	39655239	39655868	384	234	213	277
673416	chr7	39742394	39746096	AC004837.5	chr7	39737429	39739910	14	13	10	12.3333
696566	chr7	121209377	121214902	AC004875.1	chr7	120992386	121000548	6	4	6	5.33333
696566	chr7	121209377	121214902	AC004875.1	chr7	121220193	121221430	78	54	82	71.3333
689902	chr7	98610216	98611812	AC004893.11	chr7	98614331	98615491	672	388	369	476.333
662253	chr7	2981215	2986553	AC004906.3	chr7	2986624	2987443	272	172	207	217
704797	chr7	149095265	149099206	AC004941.3	chr7	149089049	149091891	380	190	195	255
687191	chr7	89797750	89805367	AC004969.1	chr7	89806288	89807456	36	34	55	41.6667
687191	chr7	89797750	89805367	AC004969.1	chr7	90053320	90068138	7	6	11	8
684306	chr7	80802658	80808518	AC005008.2	chr7	80809267	80809939	238	138	132	169.333
686128	chr7	86404114	86410019	AC005009.1	chr7	86400291	86418805	200	88	107	131.667
686128	chr7	86404114	86410019	AC005009.1	chr7	86851007	86860547	9	9	3	7
669962	chr7	28214270	28220875	AC005017.1	chr7	27216015	27216168	9	5	6	6.66667
669962	chr7	28214270	28220875	AC005017.1	chr7	27780243	27787266	15	7	9	10.3333
669962	chr7	28214270	28220875	AC005017.1	chr7	28222137	28232815	1226	378	501	701.667
674039	chr7	41727444	41736387	AC005027.4	chr7	40358497	40370778	17	9	18	14.6667
674039	chr7	41727444	41736387	AC005027.4	chr7	41726681	41726916	202	135	160	165.667
360641	chr2	102507522	102509732	AC005035.1	chr2	101627021	101641195	7	13	8	9.33333
360641	chr2	102507522	102509732	AC005035.1	chr2	102513197	102515962	767	478	345	530
391582	chr2	201697328	201710181	AC005037.1	chr2	200834555	200835581	13	6	6	8.33333
391582	chr2	201697328	201710181	AC005037.1	chr2	201710315	201713542	358	137	147	214
391613	chr2	201822381	201832549	AC005037.3	chr2	201818539	201819235	480	284	248	337.333
353933	chr2	74724092	74730955	AC005041.17	chr2	74719652	74720494	245	126	83	151.333
378112	chr2	159589994	159594240	AC005042.4	chr2	158896289	158906495	25	12	11	16
378112	chr2	159589994	159594240	AC005042.4	chr2	159585537	159588987	394	271	288	317.667
692212	chr7	107675249	107677856	AC005048.1	chr7	107664462	107682243	357	240	163	253.333
690221	chr7	99945535	99957189	AC005071.2	chr7	99958147	99968909	120	204	246	190
690229	chr7	99995835	100003646	AC005071.3	chr7	100009695	100011445	189	104	87	126.667
668396	chr7	23205292	23213193	AC005082.1	chr7	23198525	23204964	179	119	107	135
403284	chr2	242289894	242306608	AC005104.3	chr2	242282948	242287044	242	142	198	194
670673	chr7	30621402	30628695	AC005154.5	chr7	30619961	30632311	171	44	43	86
684686	chr7	81916023	81922657	AC005159.1	chr7	81909937	81914512	133	97	131	120.333
670204	chr7	29039930	29041158	AC005162.3	chr7	29035699	29039773	221	195	167	194.333
670230	chr7	29118306	29127727	AC005162.4	chr7	29112907	29131438	169	166	242	192.333
670230	chr7	29118306	29127727	AC005162.4	chr7	29426099	29444486	29	14	9	17.3333
670196	chr7	29021999	29027595	AC005162.5	chr7	29016830	29033111	195	101	117	137.667
529821	chr4	111219390	111231594	AC005187.1	chr4	110540020	110558279	5	7	2	4.66667
529821	chr4	111219390	111231594	AC005187.1	chr4	111206041	111215227	149	235	205	196.333
599058	chr5	141906466	141919576	AC005215.1	chr5	141891316	141905047	210	112	189	170.333
416678	chr20	52556648	52560771	AC005220.3	chr20	51773065	51789272	19	23	13	18.3333
416678	chr20	52556648	52560771	AC005220.3	chr20	52552339	52564603	682	460	362	501.333
416678	chr20	52556648	52560771	AC005220.3	chr20	52674027	52680156	350	121	31	167.333
416678	chr20	52556648	52560771	AC005220.3	chr20	52815161	52822454	102	53	25	60
281994	chr17	14112611	14117729	AC005224.2	chr17	14102528	14120899	203	78	119	133.333
403228	chr2	241993388	242007843	AC005237.4	chr2	242010377	242019992	45	16	54	38.3333
226887	chr14	73906576	73921687	AC005280.2	chr14	73925446	73925698	333	236	111	226.667
281003	chr17	10956285	10958706	AC005284.1	chr17	10961021	10968663	253	179	208	213.333
280888	chr17	10436767	10461060	AC005323.1	chr17	10465577	10466777	101	56	71	76
281492	chr17	12607530	12615124	AC005358.3	chr17	12616657	12625941	150	282	169	200.333
599092	chr5	142028309	142037056	AC005370.1	chr5	142253282	142266911	32	16	15	21
706942	chr7	157394807	157419983	AC005481.5	chr7	157389897	157393732	216	141	127	161.333
673330	chr7	39443814	39453173	AC005483.3	chr7	38829093	38842220	8	5	15	9.33333
673330	chr7	39443814	39453173	AC005483.3	chr7	39441846	39457084	172	113	136	140.333
322380	chr19	13472343	13487123	AC005513.1	chr19	13461416	13467307	103	65	101	89.6667
706699	chr7	156449637	156452943	AC005534.8	chr7	156445416	156459865	135	149	107	130.333
706703	chr7	156467718	156471115	AC005534.9	chr7	156471235	156475067	406	248	262	305.333
401510	chr2	234863824	234864689	AC005538.5	chr2	234852749	234862763	193	144	172	169.667
293990	chr17	65017447	65035836	AC005544.1	chr17	65045184	65049456	169	94	98	120.333
281025	chr17	11030374	11041661	AC005548.2	chr17	11042198	11048380	89	86	78	84.3333
320999	chr19	4675596	4689195	AC005594.1	chr19	4690489	4707080	16	5	7	9.33333
328764	chr19	42067130	42072031	AC005626.1	chr19	42058065	42065467	696	397	256	449.667
281060	chr17	11169777	11171608	AC005725.1	chr17	11163438	11169212	485	289	450	408
284385	chr17	26921285	26928795	AC005726.11	chr17	26917049	26919174	15	20	10	15
598917	chr5	141358041	141365080	AC005740.5	chr5	141365551	141368249	66	82	70	72.6667
598917	chr5	141358041	141365080	AC005740.5	chr5	141519259	141525570	46	16	12	24.6667
142508	chr12	2946158	2967420	AC005841.1	chr12	2972101	2983852	357	211	232	266.667
282158	chr17	14678861	14683932	AC005863.1	chr17	14686237	14696128	146	85	122	117.667
793794	chrX	30332281	30337512	AC005926.1	chrX	30323047	30324292	74	51	53	59.3333
282571	chr17	16219732	16239233	AC005971.3	chr17	16216449	16217227	261	148	217	208.667
666076	chr7	16128615	16132568	AC006035.2	chr7	14758172	14762782	10	2	4	5.33333
666076	chr7	16128615	16132568	AC006035.2	chr7	15348201	15359458	8	9	6	7.66667
666076	chr7	16128615	16132568	AC006035.2	chr7	16120059	16137647	187	123	92	134
666076	chr7	16128615	16132568	AC006035.2	chr7	16462079	16475278	24	15	14	17.6667
666076	chr7	16128615	16132568	AC006035.2	chr7	16595430	16609351	35	18	38	30.3333
663468	chr7	8153167	8156322	AC006042.6	chr7	7468799	7483071	9	5	8	7.33333
684583	chr7	81638222	81640005	AC006145.4	chr7	80327316	80339256	8	3	6	5.66667
684583	chr7	81638222	81640005	AC006145.4	chr7	81131151	81142690	24	21	16	20.3333
684583	chr7	81638222	81640005	AC006145.4	chr7	81634836	81640686	118	146	258	174
684583	chr7	81638222	81640005	AC006145.4	chr7	82224187	82233553	9	3	9	7
694986	chr7	116210079	116213191	AC006159.4	chr7	115900071	115912445	68	27	40	45
694986	chr7	116210079	116213191	AC006159.4	chr7	116201521	116204180	357	201	213	257
694980	chr7	116182823	116192788	AC006159.5	chr7	116195909	116200733	372	191	208	257
500997	chr4	17608919	17616354	AC006160.5	chr4	17597131	17607429	340	211	192	247.667
500997	chr4	17608919	17616354	AC006160.5	chr4	17813639	17815798	65	30	35	43.3333
500997	chr4	17608919	17616354	AC006160.5	chr4	18025641	18032970	15	7	10	10.6667
321691	chr19	9343318	9353405	AC006271.2	chr19	9356576	9357853	149	88	106	114.333
321691	chr19	9343318	9353405	AC006271.2	chr19	9574685	9585122	23	13	17	17.6667
320784	chr19	2906665	2917330	AC006277.2	chr19	2923283	2934464	323	126	186	211.667
313206	chr18	53858306	53862432	AC006305.1	chr18	53849710	53856574	115	76	109	100
685217	chr7	83545597	83552907	AC006322.1	chr7	83544634	83545104	249	146	122	172.333
685217	chr7	83545597	83552907	AC006322.1	chr7	84649783	84659723	8	8	14	10
342797	chr2	37826702	37832022	AC006369.2	chr2	37834471	37840247	216	219	110	181.667
706921	chr7	157310478	157323885	AC006372.1	chr7	157329264	157342852	397	207	59	221
671038	chr7	31830858	31834729	AC006377.1	chr7	31835004	31835172	709	547	498	584.667
671038	chr7	31830858	31834729	AC006377.1	chr7	32083323	32088890	36	20	33	29.6667
671038	chr7	31830858	31834729	AC006377.1	chr7	32237555	32255690	38	15	21	24.6667
688428	chr7	93596333	93601243	AC006378.2	chr7	93592071	93595053	246	144	169	186.333
670911	chr7	31353919	31359988	AC006380.1	chr7	31348182	31353216	210	113	147	156.667
279153	chr17	2314092	2319703	AC006435.1	chr17	1796696	1813312	18	13	15	15.3333
279153	chr17	2314092	2319703	AC006435.1	chr17	1965344	1971785	42	25	25	30.6667
279153	chr17	2314092	2319703	AC006435.1	chr17	2305925	2307732	814	439	442	565
388350	chr2	191569644	191574683	AC006460.2	chr2	191576504	191580579	342	216	266	274.667
663326	chr7	7670628	7680978	AC006465.3	chr7	7682482	7685379	96	61	91	82.6667
663326	chr7	7670628	7680978	AC006465.3	chr7	8012182	8013680	12	7	8	9
663326	chr7	7670628	7680978	AC006465.3	chr7	8244808	8261679	9	9	9	9
301841	chr18	14117699	14124966	AC006557.2	chr18	14112378	14114992	74	56	33	54.3333
147973	chr12	21560223	21566894	AC006559.1	chr12	21551599	21558427	107	163	265	178.333
672450	chr7	36501010	36504170	AC006960.7	chr7	36489994	36493782	209	115	129	151
672450	chr7	36501010	36504170	AC006960.7	chr7	37225132	37236225	32	18	24	24.6667
686711	chr7	88269219	88272948	AC006988.1	chr7	88264809	88266546	211	161	107	159.667
686711	chr7	88269219	88272948	AC006988.1	chr7	89096378	89113535	5	6	3	4.66667
667428	chr7	20171189	20182032	AC007001.4	chr7	20183873	20187163	263	205	211	226.333
667428	chr7	20171189	20182032	AC007001.4	chr7	20346880	20352838	19	11	17	15.6667
667428	chr7	20171189	20182032	AC007001.4	chr7	20638036	20639529	12	8	8	9.33333
394370	chr2	210893932	210895712	AC007038.7	chr2	210885660	210886566	276	131	178	195
352998	chr2	71215399	71238800	AC007040.6	chr2	71206828	71215263	16	16	20	17.3333
352987	chr2	71171022	71181375	AC007040.7	chr2	70546325	70558229	15	6	9	10
352987	chr2	71171022	71181375	AC007040.7	chr2	71168992	71169598	599	371	466	478.667
430243	chr22	20874573	20891767	AC007050.17	chr22	20866800	20872761	339	177	306	274
228118	chr14	78856357	78870336	AC007056.1	chr14	78873507	78873672	52	42	37	43.6667
670231	chr7	29127728	29130040	AC007096.1	chr7	29131439	29134984	234	160	150	181.333
670231	chr7	29127728	29130040	AC007096.1	chr7	29420272	29437100	15	16	10	13.6667
350586	chr2	63083481	63093347	AC007098.1	chr2	63094055	63094401	17	24	8	16.3333
354213	chr2	75699717	75702099	AC007099.2	chr2	74914338	74919833	4	3	4	3.66667
354213	chr2	75699717	75702099	AC007099.2	chr2	75146467	75154388	19	11	7	12.3333
354213	chr2	75699717	75702099	AC007099.2	chr2	75406658	75412869	30	14	14	19.3333
354213	chr2	75699717	75702099	AC007099.2	chr2	75693658	75696000	221	183	157	187
349523	chr2	59467626	59474178	AC007131.1	chr2	59462352	59465893	276	162	195	211
349549	chr2	59548855	59555328	AC007131.2	chr2	59533606	59548758	87	60	39	62
227428	chr14	76041807	76048096	AC007182.1	chr14	76035473	76038270	237	114	144	165
391864	chr2	202703438	202707658	AC007242.1	chr2	202708703	202717571	1012	570	648	743.333
391864	chr2	202703438	202707658	AC007242.1	chr2	203028395	203044606	107	50	63	73.3333
360745	chr2	102796770	102798587	AC007271.3	chr2	101672119	101690545	5	3	5	4.33333
360745	chr2	102796770	102798587	AC007271.3	chr2	102631079	102642523	70	27	65	54
360745	chr2	102796770	102798587	AC007271.3	chr2	102789465	102790458	402	233	255	296.667
360745	chr2	102796770	102798587	AC007271.3	chr2	103068769	103078419	31	18	23	24
670506	chr7	30031879	30040472	AC007285.1	chr7	30050489	30059821	8	7	5	6.66667
670505	chr7	30020860	30031878	AC007285.6	chr7	30016316	30020819	362	384	148	298
670528	chr7	30114142	30117439	AC007285.7	chr7	29646948	29665726	12	8	13	11
670528	chr7	30114142	30117439	AC007285.7	chr7	30109146	30119750	441	200	159	266.667
670528	chr7	30114142	30117439	AC007285.7	chr7	30601302	30608930	19	9	26	18
430286	chr22	21074475	21084073	AC007308.1	chr22	21104135	21118577	81	52	43	58.6667
672378	chr7	36267377	36276565	AC007327.5	chr7	36263238	36263783	14	15	10	13
268707	chr16	52281792	52289815	AC007333.1	chr16	52291954	52294753	326	208	302	278.667
268010	chr16	49689083	49714490	AC007339.1	chr16	49686792	49687357	129	110	156	131.667
672551	chr7	36873585	36884968	AC007349.7	chr7	36871919	36891582	120	50	92	87.3333
672551	chr7	36873585	36884968	AC007349.7	chr7	37223064	37235480	7	4	5	5.33333
391895	chr2	202817838	202818898	AC007358.1	chr2	202811155	202813601	438	264	287	329.667
393006	chr2	206624678	206641859	AC007362.3	chr2	206618306	206622607	303	186	233	240.667
351209	chr2	65002925	65007574	AC007365.1	chr2	65010613	65019370	386	212	429	342.333
393097	chr2	206976307	206983973	AC007383.4	chr2	206970430	206988904	431	304	201	312
342660	chr2	37421923	37427666	AC007390.5	chr2	37421134	37421902	225	105	116	148.667
342749	chr2	37672593	37690496	AC007391.1	chr2	37665578	37670628	32	30	35	32.3333
352920	chr2	70907748	70915617	AC007395.3	chr2	70917385	70924771	164	84	77	108.333
342452	chr2	36770420	36781752	AC007401.2	chr2	36763311	36763815	169	97	76	114
346965	chr2	51657421	51664215	AC007402.1	chr2	51651924	51655991	213	129	146	162.667
381994	chr2	171568282	171575554	AC007405.2	chr2	170788074	170799173	9	4	4	5.66667
381994	chr2	171568282	171575554	AC007405.2	chr2	171246094	171257838	16	12	14	14
382013	chr2	171638259	171641967	AC007405.7	chr2	170797853	170805855	14	11	17	14
382013	chr2	171638259	171641967	AC007405.7	chr2	171235316	171251450	79	27	35	47
382013	chr2	171638259	171641967	AC007405.7	chr2	171635584	171647390	714	592	519	608.333
291621	chr17	55808976	55828271	AC007431.1	chr17	55829598	55835138	244	160	149	184.333
144113	chr12	9279208	9287943	AC007436.1	chr12	9273212	9273654	149	69	128	115.333
144937	chr12	11694590	11696292	AC007450.1	chr12	11692659	11698794	275	133	155	187.667
144937	chr12	11694590	11696292	AC007450.1	chr12	12167498	12182209	13	12	14	13
146384	chr12	16560246	16569197	AC007528.1	chr12	16315536	16324412	9	4	6	6.33333
145537	chr12	13739260	13744348	AC007535.1	chr12	13733373	13737953	505	188	466	386.333
672280	chr7	35878511	35889686	AC007551.1	chr7	35866857	35877125	96	88	103	95.6667
381490	chr2	169956259	169964906	AC007556.3	chr2	169952750	169969000	369	204	288	287
396624	chr2	217734628	217739661	AC007557.1	chr2	217741055	217743228	672	488	253	471
396624	chr2	217734628	217739661	AC007557.1	chr2	218007428	218015936	22	19	12	17.6667
396621	chr2	217713111	217719878	AC007557.4	chr2	218000758	218015576	29	10	12	17
261359	chr16	12180269	12184172	AC007601.1	chr16	12185147	12202393	174	132	101	135.667
267733	chr16	48684084	48687486	AC007611.1	chr16	48678445	48681442	29	31	18	26
490951	chr3	179112683	179117920	AC007620.3	chr3	179111203	179120922	333	280	217	276.667
145190	chr12	12507457	12515147	AC007621.1	chr12	11799778	11816191	23	12	8	14.3333
145190	chr12	12507457	12515147	AC007621.1	chr12	12515342	12520055	248	136	249	211
393060	chr2	206849773	206862955	AC007679.3	chr2	206867008	206867378	378	265	236	293
346801	chr2	51166414	51173621	AC007682.1	chr2	51176892	51177253	277	195	155	209
346808	chr2	51185620	51189733	AC007682.2	chr2	51181846	51185408	147	76	66	96.3333
379438	chr2	163623892	163626890	AC007740.1	chr2	163628299	163629477	159	129	128	138.667
379236	chr2	163013915	163023237	AC007750.5	chr2	161758194	161768195	3	2	2	2.33333
379236	chr2	163013915	163023237	AC007750.5	chr2	162103051	162108030	4	3	5	4
379236	chr2	163013915	163023237	AC007750.5	chr2	162291710	162309554	8	6	10	8
379236	chr2	163013915	163023237	AC007750.5	chr2	163025085	163031520	393	262	294	316.333
294312	chr17	66382529	66387178	AC007780.1	chr17	66376040	66391929	52	28	57	45.6667
175153	chr12	110205640	110213215	AC007834.3	chr12	109952217	109962510	57	34	25	38.6667
227188	chr14	75179298	75195674	AC007956.1	chr14	74955837	74967117	12	10	7	9.66667
227188	chr14	75179298	75195674	AC007956.1	chr14	75173441	75177266	351	214	178	247.667
700011	chr7	132714971	132721968	AC008038.1	chr7	132724011	132726967	553	371	397	440.333
228191	chr14	79082516	79084562	AC008045.1	chr14	79085815	79095437	265	234	239	246
706367	chr7	155301716	155306664	AC008060.5	chr7	155294156	155298597	298	185	178	220.333
706333	chr7	155173835	155182619	AC008060.7	chr7	154703437	154718901	33	7	9	16.3333
706350	chr7	155247684	155262051	AC008060.8	chr7	155242815	155244876	296	158	214	222.667
379207	chr2	162928826	162933700	AC008063.2	chr2	162525558	162540024	4	4	8	5.33333
379207	chr2	162928826	162933700	AC008063.2	chr2	162925268	162927831	292	206	386	294.667
336791	chr2	17022736	17028169	AC008069.1	chr2	17016528	17034350	376	246	238	286.667
336791	chr2	17022736	17028169	AC008069.1	chr2	17487978	17495553	19	15	20	18
336794	chr2	17034351	17039791	AC008069.2	chr2	17028170	17042143	319	106	158	194.333
336794	chr2	17034351	17039791	AC008069.2	chr2	17483567	17500918	6	8	10	8
338984	chr2	24295863	24302128	AC008073.5	chr2	24042024	24049052	56	18	26	33.3333
338984	chr2	24295863	24302128	AC008073.5	chr2	24281136	24290674	381	436	100	305.667
338984	chr2	24295863	24302128	AC008073.5	chr2	25035298	25042052	9	9	6	8
339005	chr2	24396269	24400364	AC008073.7	chr2	24042024	24047787	21	11	6	12.6667
339005	chr2	24396269	24400364	AC008073.7	chr2	24390476	24395815	129	78	86	97.6667
339014	chr2	24423614	24425787	AC008073.9	chr2	24425912	24434860	235	235	164	211.333
351094	chr2	64676041	64685208	AC008074.3	chr2	64685552	64686696	290	244	215	249.667
699676	chr7	131536573	131538666	AC008085.1	chr7	130518656	130533880	4	5	4	4.33333
699676	chr7	131536573	131538666	AC008085.1	chr7	131529713	131547495	609	204	462	425
699676	chr7	131536573	131538666	AC008085.1	chr7	132251298	132269149	11	11	10	10.6667
700407	chr7	134070085	134076097	AC008154.1	chr7	134067735	134082280	83	27	46	52
700378	chr7	133968001	133984111	AC008154.4	chr7	133986185	133986422	328	220	174	240.667
386782	chr2	186664132	186666379	AC008174.3	chr2	186658945	186672598	582	393	341	438.667
336458	chr2	15828658	15834232	AC008271.1	chr2	15822467	15841732	145	113	22	93.3333
378308	chr2	160242682	160244321	AC008277.1	chr2	160237369	160241718	464	357	244	355
378308	chr2	160242682	160244321	AC008277.1	chr2	160541845	160555790	39	15	14	22.6667
336419	chr2	15701485	15705850	AC008278.2	chr2	15103876	15113690	12	3	3	6
336419	chr2	15701485	15705850	AC008278.2	chr2	15696011	15712784	673	443	134	416.667
336454	chr2	15818632	15822432	AC008278.3	chr2	15822467	15824624	34	38	25	32.3333
581851	chr5	86534776	86538784	AC008394.1	chr5	86531968	86533544	533	371	311	405
602869	chr5	154402015	154408382	AC008410.1	chr5	154023093	154025379	19	8	5	10.6667
331084	chr19	54373773	54391658	AC008440.5	chr19	54394837	54398205	257	120	171	182.667
327527	chr19	35321278	35324100	AC008555.3	chr19	34463039	34482900	5	5	4	4.66667
327527	chr19	35321278	35324100	AC008555.3	chr19	35314280	35315393	418	210	191	273
578666	chr5	76431806	76434805	AC008581.1	chr5	76423684	76441296	250	236	271	252.333
578666	chr5	76431806	76434805	AC008581.1	chr5	77435004	77445797	6	5	6	5.66667
584649	chr5	95187970	95189230	AC008592.4	chr5	94982791	94994408	45	17	28	30
584649	chr5	95187970	95189230	AC008592.4	chr5	95198707	95200213	162	119	75	118.667
584649	chr5	95187970	95189230	AC008592.4	chr5	95671361	95678707	74	39	37	50
584651	chr5	95191249	95198706	AC008592.5	chr5	95200214	95204496	257	185	137	193
584651	chr5	95191249	95198706	AC008592.5	chr5	95669358	95678707	55	37	28	40
584651	chr5	95191249	95198706	AC008592.5	chr5	95936498	95941652	28	15	17	20
728702	chr8	74183162	74188264	AC008598.1	chr8	74188385	74191726	178	124	139	147
602715	chr5	153717005	153720295	AC008625.1	chr5	153445910	153448693	19	24	11	18
602715	chr5	153717005	153720295	AC008625.1	chr5	153710253	153716621	358	234	136	242.667
608237	chr5	171703461	171707150	AC008671.1	chr5	171698972	171715668	28	45	18	30.3333
603608	chr5	156800655	156804320	AC008676.1	chr5	156807857	156809004	281	205	244	243.333
330431	chr19	51144097	51154976	AC008743.7	chr19	51219302	51219523	5	3	4	4
331168	chr19	54935995	54949473	AC008746.3	chr19	54950627	54955080	151	57	54	87.3333
598817	chr5	140997436	141001348	AC008781.7	chr5	141487095	141506362	25	9	6	13.3333
567729	chr5	40793690	40802064	AC008810.1	chr5	40777574	40788633	180	87	110	125.667
573787	chr5	60850090	60854961	AC008836.1	chr5	60845472	60861966	282	219	282	261
572230	chr5	56154298	56165554	AC008937.2	chr5	55560746	55573423	45	45	37	42.3333
572230	chr5	56154298	56165554	AC008937.2	chr5	56165840	56169853	238	163	194	198.333
572230	chr5	56154298	56165554	AC008937.2	chr5	56532393	56541243	30	30	34	31.3333
564950	chr5	32378290	32379816	AC008949.1	chr5	32249669	32255466	26	18	17	20.3333
564950	chr5	32378290	32379816	AC008949.1	chr5	32383552	32384456	230	181	119	176.667
564950	chr5	32378290	32379816	AC008949.1	chr5	32602126	32612692	24	7	18	16.3333
564950	chr5	32378290	32379816	AC008949.1	chr5	33458047	33469783	5	9	4	6
597206	chr5	135048409	135058021	AC009009.1	chr5	135058378	135058803	190	155	130	158.333
258956	chr16	1029620	1036012	AC009041.2	chr16	1036134	1038654	291	137	175	201
259121	chr16	2308285	2320357	AC009065.2	chr16	2476313	2476587	44	23	27	31.3333
273164	chr16	67647068	67654519	AC009095.4	chr16	67672322	67674057	423	174	208	268.333
273164	chr16	67647068	67654519	AC009095.4	chr16	68211707	68216174	23	13	11	15.6667
278504	chr16	89231413	89240729	AC009113.2	chr16	89011312	89015141	76	52	37	55
278504	chr16	89231413	89240729	AC009113.2	chr16	89615575	89631092	13	8	7	9.33333
261222	chr16	11428923	11444698	AC009121.1	chr16	11447315	11452430	553	326	343	407.333
277591	chr16	84225815	84257830	AC009123.1	chr16	84261133	84262442	18	17	19	18
265790	chr16	29819843	29830118	AC009133.1	chr16	29837305	29840089	31	18	24	24.3333
277403	chr16	83434090	83438391	AC009142.1	chr16	83438856	83448911	98	121	145	121.333
276333	chr16	79702029	79710780	AC009159.1	chr16	79697132	79701185	273	138	237	216
276333	chr16	79702029	79710780	AC009159.1	chr16	80491145	80507447	9	6	5	6.66667
393473	chr2	208174591	208175887	AC009226.1	chr2	207661375	207671007	22	8	11	13.6667
393473	chr2	208174591	208175887	AC009226.1	chr2	208164029	208173463	387	484	249	373.333
376766	chr2	155308983	155314644	AC009227.2	chr2	155299025	155306576	508	183	316	335.667
346725	chr2	50922472	50929597	AC009234.1	chr2	50931398	50933196	216	157	159	177.333
378964	chr2	162199599	162208201	AC009299.1	chr2	162208323	162216639	247	116	75	146
378936	chr2	162108416	162118044	AC009299.2	chr2	162094370	162100079	121	54	83	86
365459	chr2	118749134	118755558	AC009303.1	chr2	118578889	118586224	85	48	54	62.3333
365390	chr2	118555596	118563122	AC009312.1	chr2	118544882	118548592	109	64	75	82.6667
378896	chr2	162013468	162020247	AC009313.1	chr2	162010570	162012747	209	160	164	177.667
699924	chr7	132443212	132448012	AC009365.4	chr7	132434530	132454485	186	163	107	152
663414	chr7	7986211	7991370	AC009473.1	chr7	7981773	7983420	324	193	201	239.333
374592	chr2	148659912	148660536	AC009480.3	chr2	148653387	148658465	717	328	211	418.667
378991	chr2	162278434	162285226	AC009487.4	chr2	162275757	162277412	403	333	245	327
378991	chr2	162278434	162285226	AC009487.4	chr2	162809304	162828481	10	3	7	6.66667
350652	chr2	63274196	63276073	AC009501.4	chr2	63015866	63026228	43	24	25	30.6667
350652	chr2	63274196	63276073	AC009501.4	chr2	63266472	63270099	609	312	304	408.333
361840	chr2	106471337	106474382	AC009505.2	chr2	105959435	105970619	15	8	13	12
361840	chr2	106471337	106474382	AC009505.2	chr2	106191584	106199429	34	15	16	21.6667
361840	chr2	106471337	106474382	AC009505.2	chr2	106466603	106468950	613	373	494	493.333
378381	chr2	160470703	160474295	AC009506.1	chr2	159995589	160000564	33	15	7	18.3333
378381	chr2	160470703	160474295	AC009506.1	chr2	160464425	160470350	336	137	125	199.333
699951	chr7	132514929	132517014	AC009518.8	chr7	132510702	132522960	714	314	371	466.333
700651	chr7	134878946	134885205	AC009542.2	chr7	134690454	134694556	41	21	26	29.3333
700651	chr7	134878946	134885205	AC009542.2	chr7	134885224	134894091	742	261	414	472.333
249922	chr15	70017141	70023265	AC009677.1	chr15	70014794	70016593	322	174	162	219.333
249922	chr15	70017141	70023265	AC009677.1	chr15	70775928	70795924	23	9	20	17.3333
700958	chr7	135926229	135930509	AC009784.1	chr7	135921974	135936883	230	178	170	192.667
305802	chr18	30104299	30111824	AC009835.1	chr18	29751191	29767631	10	4	5	6.33333
305802	chr18	30104299	30111824	AC009835.1	chr18	30114963	30117192	114	85	122	107
400597	chr2	231033334	231037959	AC009950.2	chr2	231032134	231032571	415	260	276	317
349948	chr2	60722184	60725012	AC009970.1	chr2	60716673	60717200	536	395	307	412.667
400537	chr2	230856524	230861388	AC009973.1	chr2	230872818	230877233	77	33	44	51.3333
400537	chr2	230856524	230861388	AC009973.1	chr2	231445661	231449528	9	6	8	7.66667
99898	chr10	125494351	125510302	AC009987.1	chr10	125518984	125519797	59	31	57	49
242481	chr15	44822817	44829911	AC009996.1	chr15	44578112	44591948	45	10	12	22.3333
242481	chr15	44822817	44829911	AC009996.1	chr15	44815653	44821505	291	198	202	230.333
245938	chr15	56050721	56059493	AC009997.1	chr15	56062778	56065377	255	119	208	194
666841	chr7	18469758	18490399	AC010082.2	chr7	18491450	18493239	214	171	157	180.667
380476	chr2	166787508	166792582	AC010127.5	chr2	166777912	166779626	137	79	107	107.667
396965	chr2	218837220	218846235	AC010136.2	chr2	218651388	218662944	33	27	16	25.3333
396965	chr2	218837220	218846235	AC010136.2	chr2	218846312	218854150	130	120	237	162.333
370785	chr2	137300815	137304108	AC010146.1	chr2	137295654	137307261	527	230	430	395.667
339383	chr2	25939081	25945218	AC010150.1	chr2	25949746	25957412	79	49	59	62.3333
476661	chr3	134126245	134129192	AC010207.1	chr3	134120997	134133405	388	253	367	336
172511	chr12	101048492	101052686	AC010209.1	chr12	100629215	100641760	12	7	9	9.33333
172511	chr12	101048492	101052686	AC010209.1	chr12	101057580	101069766	192	114	117	141
590975	chr5	114937005	114941483	AC010226.4	chr5	114637936	114643560	70	70	42	60.6667
590975	chr5	114937005	114941483	AC010226.4	chr5	114934287	114945631	719	310	334	454.333
590975	chr5	114937005	114941483	AC010226.4	chr5	115184962	115185674	59	35	32	42
591074	chr5	115288934	115299576	AC010282.1	chr5	115300388	115306519	288	254	306	282.667
602636	chr5	153469738	153475565	AC010295.1	chr5	153466748	153480938	358	117	91	188.667
602636	chr5	153469738	153475565	AC010295.1	chr5	153790881	153793238	43	28	18	29.6667
602636	chr5	153469738	153475565	AC010295.1	chr5	154251210	154269074	7	5	3	5
602636	chr5	153469738	153475565	AC010295.1	chr5	154418533	154437556	4	9	4	5.66667
321490	chr19	7964624	7985867	AC010336.2	chr19	7955999	7961980	118	54	69	80.3333
565785	chr5	35034176	35037074	AC010368.1	chr5	35031119	35033795	289	194	225	236
575869	chr5	67262227	67272248	AC010376.1	chr5	67257257	67274902	217	122	158	165.667
563594	chr5	27984805	27988774	AC010455.1	chr5	27993200	27994860	15	11	5	10.3333
330024	chr19	48552650	48555114	AC010458.1	chr19	48556362	48567084	105	42	84	77
589528	chr5	110603795	110607566	AC010468.2	chr5	110591427	110599718	193	101	167	153.667
278289	chr16	87734983	87747486	AC010536.1	chr16	87748635	87757997	279	235	123	212.333
278289	chr16	87734983	87747486	AC010536.1	chr16	88088615	88094980	15	21	8	14.6667
278287	chr16	87726406	87733963	AC010536.2	chr16	87747487	87748634	117	67	68	84
271829	chr16	62858452	62863213	AC010546.1	chr16	62852019	62852209	323	209	294	275.333
603568	chr5	156654508	156666310	AC010609.1	chr5	156902433	156912212	16	8	11	11.6667
384455	chr2	179499966	179504080	AC010680.1	chr2	179494615	179496370	252	170	176	199.333
393255	chr2	207473769	207475203	AC010731.2	chr2	207467752	207478469	250	155	123	176
393255	chr2	207473769	207475203	AC010731.2	chr2	208344463	208346695	4	6	3	4.33333
393275	chr2	207503231	207509772	AC010731.3	chr2	207511193	207514643	601	372	432	468.333
344061	chr2	41820977	41823735	AC010739.1	chr2	41826363	41832454	90	70	102	87.3333
303026	chr18	21472406	21475822	AC010754.1	chr18	21465510	21472163	293	185	247	241.667
736007	chr8	97655976	97662338	AC010859.1	chr8	97653776	97671090	176	226	170	190.667
736007	chr8	97655976	97662338	AC010859.1	chr8	98168427	98182820	14	10	11	11.6667
338123	chr2	21344865	21349759	AC010872.2	chr2	21343333	21343593	278	208	101	195.667
344502	chr2	43455071	43460452	AC010883.5	chr2	43711710	43717356	67	43	57	55.6667
103230	chr11	4463939	4472503	AC010930.1	chr11	4216460	4219862	42	16	29	29
103230	chr11	4463939	4472503	AC010930.1	chr11	4475091	4476395	403	228	160	263.667
334815	chr2	10141130	10167070	AC010969.1	chr2	9938282	9951633	15	8	12	11.6667
334815	chr2	10141130	10167070	AC010969.1	chr2	10120126	10130933	80	51	46	59
705190	chr7	150720024	150728615	AC010973.1	chr7	151211791	151215276	6	8	4	6
369589	chr2	133415643	133418532	AC010974.3	chr2	133421101	133428934	276	180	211	222.333
355485	chr2	79726832	79729925	AC010975.1	chr2	79723355	79735631	110	114	85	103
368206	chr2	128224215	128225863	AC010976.2	chr2	128085994	128094099	41	17	22	26.6667
368206	chr2	128224215	128225863	AC010976.2	chr2	128228437	128229809	427	229	230	295.333
368206	chr2	128224215	128225863	AC010976.2	chr2	128765525	128774235	4	5	3	4
398171	chr2	223182946	223186906	AC010980.2	chr2	222913615	222928926	18	14	11	14.3333
398171	chr2	223182946	223186906	AC010980.2	chr2	223191010	223194108	220	125	100	148.333
85650	chr10	77152036	77167684	AC010997.1	chr10	77171382	77176267	165	105	104	124.667
85650	chr10	77152036	77167684	AC010997.1	chr10	77792181	77799138	34	17	38	29.6667
85650	chr10	77152036	77167684	AC010997.1	chr10	78062690	78078540	15	6	13	11.3333
246296	chr15	57255608	57268106	AC010999.1	chr15	57241817	57244492	35	22	28	28.3333
246296	chr15	57255608	57268106	AC010999.1	chr15	57413422	57426217	5	18	18	13.6667
726618	chr8	67831881	67835836	AC011031.1	chr8	67829447	67830263	561	343	227	377
726618	chr8	67831881	67835836	AC011031.1	chr8	67937497	67952340	67	28	22	39
338840	chr2	23746714	23748787	AC011239.1	chr2	23744995	23745445	137	96	93	108.667
343104	chr2	38824491	38833092	AC011247.3	chr2	38140081	38149031	8	5	6	6.33333
343104	chr2	38824491	38833092	AC011247.3	chr2	38837142	38839029	507	255	189	317
662432	chr7	3682500	3683828	AC011284.3	chr7	3679292	3681758	120	196	187	167.667
673385	chr7	39600890	39606716	AC011290.4	chr7	38839627	38849101	16	13	11	13.3333
673385	chr7	39600890	39606716	AC011290.4	chr7	39773241	39784213	137	42	96	91.6667
673385	chr7	39600890	39606716	AC011290.4	chr7	39867868	39886196	34	11	25	23.3333
675345	chr7	46798106	46804187	AC011294.3	chr7	46795361	46798000	242	168	171	193.667
495714	chr3	194864153	194868702	AC011325.1	chr3	194394495	194403841	41	25	17	27.6667
495714	chr3	194864153	194868702	AC011325.1	chr3	194869112	194871165	579	342	226	382.333
608684	chr5	173471072	173474167	AC011333.1	chr5	173464597	173466502	398	287	333	339.333
608684	chr5	173471072	173474167	AC011333.1	chr5	173738264	173751623	45	16	23	28
600490	chr5	146453876	146465843	AC011357.1	chr5	146449708	146450163	192	105	151	149.333
604616	chr5	160082781	160092590	AC011363.1	chr5	160078111	160078646	256	163	173	197.333
589082	chr5	109216588	109220762	AC011366.3	chr5	107970865	107983618	10	8	4	7.33333
589082	chr5	109216588	109220762	AC011366.3	chr5	109210385	109230346	230	93	76	133
589082	chr5	109216588	109220762	AC011366.3	chr5	109957190	109965911	8	4	6	6
608277	chr5	171863813	171879294	AC011407.1	chr5	171859274	171861296	244	137	234	205
328339	chr19	39573814	39596841	AC011443.1	chr19	39602205	39605969	98	62	82	80.6667
328201	chr19	38543471	38546215	AC011465.1	chr19	37842410	37848537	6	11	4	7
328201	chr19	38543471	38546215	AC011465.1	chr19	38536734	38553713	403	297	280	326.667
324324	chr19	22784025	22790756	AC011467.2	chr19	22299449	22304079	5	4	2	3.66667
324324	chr19	22784025	22790756	AC011467.2	chr19	22623622	22634827	7	3	4	4.66667
324324	chr19	22784025	22790756	AC011467.2	chr19	22795533	22799956	104	52	73	76.3333
321954	chr19	10777033	10778793	AC011475.2	chr19	10786221	10794126	611	276	314	400.333
326487	chr19	31101478	31115185	AC011478.1	chr19	31095182	31100531	253	159	210	207.333
326487	chr19	31101478	31115185	AC011478.1	chr19	31647655	31658091	8	7	6	7
329783	chr19	46992305	47002560	AC011484.1	chr19	47008270	47011712	86	52	60	66
328932	chr19	42920697	42933052	AC011497.1	chr19	42613000	42628922	28	15	22	21.6667
328932	chr19	42920697	42933052	AC011497.1	chr19	42937624	42938384	239	159	125	174.333
699810	chr7	132031756	132038662	AC011625.1	chr7	132043453	132049158	94	67	97	86
699810	chr7	132031756	132038662	AC011625.1	chr7	132245037	132263587	16	9	13	12.6667
743847	chr8	122077979	122083719	AC011626.1	chr8	121687518	121702894	16	5	11	10.6667
355813	chr2	80752200	80755142	AC011741.1	chr2	80745903	80758001	236	323	398	319
334448	chr2	8821099	8824736	AC011747.7	chr2	7564202	7575376	14	5	11	10
334448	chr2	8821099	8824736	AC011747.7	chr2	8443613	8457936	29	11	15	18.3333
334448	chr2	8821099	8824736	AC011747.7	chr2	8811210	8828142	254	92	100	148.667
341791	chr2	34628660	34632131	AC011748.1	chr2	34632274	34634080	89	56	81	75.3333
370560	chr2	136566352	136579822	AC011893.3	chr2	135748948	135761608	20	12	5	12.3333
370560	chr2	136566352	136579822	AC011893.3	chr2	136581899	136588696	296	152	197	215
370560	chr2	136566352	136579822	AC011893.3	chr2	137133665	137139709	14	7	6	9
707014	chr7	157818448	157820817	AC011899.10	chr7	157814779	157826297	531	306	346	394.333
252340	chr15	79268847	79273009	AC011944.1	chr15	79273033	79274548	589	355	417	453.667
252340	chr15	79268847	79273009	AC011944.1	chr15	79474470	79481251	45	16	32	31
725423	chr8	64114923	64122494	AC011978.1	chr8	64107807	64126378	116	69	128	104.333
243408	chr15	47843264	47845877	AC012050.1	chr15	47841486	47851229	246	232	176	218
243408	chr15	47843264	47845877	AC012050.1	chr15	48224450	48238380	10	5	11	8.66667
244379	chr15	51056770	51060365	AC012100.1	chr15	51062782	51065599	635	351	340	442
244379	chr15	51056770	51060365	AC012100.1	chr15	51165832	51173443	156	71	59	95.3333
714103	chr8	23625837	23626477	AC012119.1	chr8	23622763	23624231	279	178	174	210.333
305881	chr18	30343576	30351087	AC012123.1	chr18	30340698	30343061	88	44	62	64.6667
259818	chr16	5808644	5813214	AC012175.1	chr16	5807144	5818141	121	86	94	100.333
717705	chr8	35646020	35651234	AC012215.1	chr8	35640987	35645768	268	118	241	209
401943	chr2	236475721	236491563	AC012305.1	chr2	236472548	236474278	58	35	71	54.6667
359115	chr2	96867770	96885100	AC012307.3	chr2	96859148	96866717	251	165	83	166.333
328023	chr19	37726761	37730425	AC012309.4	chr19	37732589	37734108	801	433	406	546.667
331132	chr19	54703387	54706732	AC012314.20	chr19	54708944	54715550	471	600	406	492.333
331118	chr19	54622003	54643157	AC012314.8	chr19	54647786	54653910	232	143	171	182
345003	chr2	45147796	45150147	AC012354.1	chr2	44703066	44713036	38	28	29	31.6667
345003	chr2	45147796	45150147	AC012354.1	chr2	45139317	45154392	847	284	571	567.333
345003	chr2	45147796	45150147	AC012354.1	chr2	45703311	45718698	24	10	16	16.6667
348241	chr2	55504703	55510852	AC012358.1	chr2	54806289	54822425	7	3	9	6.33333
348241	chr2	55504703	55510852	AC012358.1	chr2	55495767	55495937	424	249	174	282.333
348218	chr2	55435744	55447208	AC012358.7	chr2	55249163	55267726	27	21	12	20
348218	chr2	55435744	55447208	AC012358.7	chr2	55449358	55452899	232	160	84	158.667
361711	chr2	105988215	105992684	AC012360.6	chr2	105995298	105996296	867	588	580	678.333
366091	chr2	120972997	120976985	AC012363.4	chr2	120508455	120522212	32	10	9	17
366091	chr2	120972997	120976985	AC012363.4	chr2	120978858	120988066	305	353	348	335.333
335215	chr2	11862104	11866370	AC012456.3	chr2	11854706	11858850	455	246	268	323
335215	chr2	11862104	11866370	AC012456.3	chr2	12866675	12872046	8	9	6	7.66667
335217	chr2	11885173	11887693	AC012456.4	chr2	10948080	10964088	15	6	6	9
335217	chr2	11885173	11887693	AC012456.4	chr2	11893967	11903906	274	130	166	190
335217	chr2	11885173	11887693	AC012456.4	chr2	12850571	12865712	13	6	13	10.6667
339270	chr2	25420261	25430720	AC012457.2	chr2	25196087	25207941	56	28	27	37
362628	chr2	109144635	109152181	AC012487.2	chr2	109158414	109166052	122	72	56	83.3333
362628	chr2	109144635	109152181	AC012487.2	chr2	109394954	109409090	12	10	7	9.66667
384130	chr2	178560531	178566375	AC012499.1	chr2	178567346	178567842	119	91	101	103.667
400782	chr2	231772014	231777477	AC012507.4	chr2	231779066	231780691	352	220	194	255.333
396458	chr2	217122614	217126407	AC012513.6	chr2	217119946	217121974	406	216	166	262.667
381876	chr2	171206926	171209245	AC012594.1	chr2	171202104	171203692	404	340	232	325.333
381876	chr2	171206926	171209245	AC012594.1	chr2	171659378	171664026	44	27	23	31.3333
263259	chr16	19603119	19613126	AC012621.1	chr16	19600100	19600936	761	491	453	568.333
263259	chr16	19603119	19613126	AC012621.1	chr16	19882309	19894205	59	36	31	42
390480	chr2	198059736	198063912	AC013264.2	chr2	198056474	198067200	217	144	140	167
390480	chr2	198059736	198063912	AC013264.2	chr2	198633755	198648039	12	7	3	7.33333
365887	chr2	120233357	120234537	AC013275.2	chr2	119774102	119782570	11	8	10	9.66667
365887	chr2	120233357	120234537	AC013275.2	chr2	119985371	120001587	14	11	8	11
365887	chr2	120233357	120234537	AC013275.2	chr2	120236774	120240150	201	117	119	145.667
171846	chr12	98997010	99001205	AC013283.1	chr12	98990932	98996949	201	110	103	138
674837	chr7	44812016	44830988	AC013436.6	chr7	44808380	44811973	272	158	145	191.667
372928	chr2	143761781	143765376	AC013444.1	chr2	142932384	142950417	8	4	6	6
372928	chr2	143761781	143765376	AC013444.1	chr2	143424711	143436971	30	18	17	21.6667
372928	chr2	143761781	143765376	AC013444.1	chr2	143758205	143771246	401	86	145	210.667
382707	chr2	173934854	173949207	AC013461.1	chr2	173952343	173953341	321	196	104	207
382707	chr2	173934854	173949207	AC013461.1	chr2	174068399	174071441	39	48	40	42.3333
382707	chr2	173934854	173949207	AC013461.1	chr2	175222491	175236232	5	5	4	4.66667
388056	chr2	190640564	190644188	AC013468.1	chr2	190653626	190654586	128	87	93	102.667
388056	chr2	190640564	190644188	AC013468.1	chr2	190935862	190939750	33	17	11	20.3333
388056	chr2	190640564	190644188	AC013468.1	chr2	191155398	191167441	12	5	10	9
388056	chr2	190640564	190644188	AC013468.1	chr2	191380662	191390087	12	7	4	7.66667
388056	chr2	190640564	190644188	AC013468.1	chr2	191753832	191758059	5	8	6	6.33333
339711	chr2	27235655	27241543	AC013472.3	chr2	27220124	27231055	199	100	121	140
339709	chr2	27231056	27232697	AC013472.4	chr2	27214154	27220123	248	193	190	210.333
344158	chr2	42181346	42185198	AC013480.1	chr2	42167996	42179539	71	74	129	91.3333
344179	chr2	42250839	42255725	AC013480.2	chr2	42249287	42263463	330	202	656	396
360392	chr2	101744828	101752846	AC013722.1	chr2	101731502	101742873	204	62	213	159.667
377864	chr2	158710443	158713813	AC013731.1	chr2	158162013	158173218	5	7	7	6.33333
377864	chr2	158710443	158713813	AC013731.1	chr2	158700552	158704803	391	159	252	267.333
732884	chr8	87669585	87678149	AC013751.1	chr8	87665437	87666490	61	33	37	43.6667
102840	chr11	2878924	2889769	AC013791.10	chr11	2558431	2573010	50	23	29	34
102840	chr11	2878924	2889769	AC013791.10	chr11	2894689	2895792	296	126	190	204
747948	chr8	135604197	135611914	AC015599.1	chr8	135601384	135603659	336	220	378	311.333
258387	chr15	100888624	100891243	AC015723.1	chr15	100891547	100894783	21	28	16	21.6667
252628	chr15	80214950	80219292	AC015871.2	chr15	80208110	80209567	22	27	24	24.3333
280957	chr17	10783608	10791885	AC015908.1	chr17	10775473	10793992	255	149	347	250.333
280957	chr17	10783608	10791885	AC015908.1	chr17	11041662	11048380	51	17	28	32
280957	chr17	10783608	10791885	AC015908.1	chr17	11850802	11864837	21	10	8	13
293056	chr17	61491614	61491812	AC015923.1	chr17	60747274	60748337	70	41	41	50.6667
293056	chr17	61491614	61491812	AC015923.1	chr17	61155878	61165653	70	63	29	54
293056	chr17	61491614	61491812	AC015923.1	chr17	61488373	61495893	1132	552	553	745.667
304285	chr18	25531042	25538289	AC015933.2	chr18	25544434	25548999	55	20	8	27.6667
288144	chr17	42979068	42995720	AC015936.3	chr17	42998383	43008330	378	227	244	283
339641	chr2	26893511	26897707	AC015977.6	chr2	26890850	26892695	79	55	45	59.6667
700848	chr7	135611431	135613304	AC015987.1	chr7	135606759	135614105	654	279	372	435
315218	chr18	60488852	60513017	AC015989.1	chr18	60518272	60519195	196	104	92	130.667
315218	chr18	60488852	60513017	AC015989.1	chr18	60990420	61007855	9	4	4	5.66667
722218	chr8	53949717	53958099	AC016113.1	chr8	55118446	55137679	2	4	2	2.66667
296830	chr17	76488337	76495298	AC016182.1	chr17	76485435	76485674	156	119	94	123
296830	chr17	76488337	76495298	AC016182.1	chr17	76694689	76713558	13	7	11	10.3333
729422	chr8	76696203	76703622	AC016194.1	chr8	76709761	76721756	71	102	131	101.333
278915	chr17	1075669	1094570	AC016292.1	chr17	1095770	1096852	101	52	79	77.3333
744434	chr8	123849078	123876494	AC016405.1	chr8	123882359	123890733	48	57	100	68.3333
559619	chr5	14906479	14911874	AC016575.1	chr5	14732777	14752593	37	21	11	23
320931	chr19	4032971	4043411	AC016586.1	chr19	4044767	4061868	56	36	47	46.3333
572253	chr5	56231243	56241729	AC016644.1	chr5	55556634	55567802	19	11	6	12
572253	chr5	56231243	56241729	AC016644.1	chr5	56228457	56229898	465	302	214	327
355706	chr2	80470450	80474263	AC016670.1	chr2	80475362	80476503	573	352	389	438
363916	chr2	113922865	113938924	AC016683.5	chr2	113906423	113913602	49	38	23	36.6667
363918	chr2	113959161	113969848	AC016683.6	chr2	113975079	113977017	174	89	159	140.667
342928	chr2	38262015	38264301	AC016689.1	chr2	38269729	38275591	240	141	100	160.333
393750	chr2	209118065	209122124	AC016697.3	chr2	208625317	208628602	24	21	14	19.6667
393750	chr2	209118065	209122124	AC016697.3	chr2	209110019	209114272	344	187	165	232
372702	chr2	143069651	143072487	AC016706.1	chr2	143062595	143068550	253	193	226	224
355641	chr2	80254559	80259712	AC016716.2	chr2	80260864	80261086	420	272	357	349.667
355641	chr2	80254559	80259712	AC016716.2	chr2	80668177	80677362	9	8	3	6.66667
345546	chr2	47036996	47044895	AC016722.1	chr2	47032504	47035850	233	136	224	197.667
345553	chr2	47078934	47085466	AC016722.3	chr2	45909199	45914292	7	4	5	5.33333
345553	chr2	47078934	47085466	AC016722.3	chr2	47087848	47088197	442	227	271	313.333
381112	chr2	168797156	168798978	AC016723.4	chr2	168345965	168357970	7	7	9	7.66667
381112	chr2	168797156	168798978	AC016723.4	chr2	168793869	168796585	458	200	180	279.333
365833	chr2	120001588	120012611	AC016736.2	chr2	120012702	120018638	250	54	151	151.667
360346	chr2	101593126	101596772	AC016738.3	chr2	101220825	101227040	63	25	33	40.3333
383547	chr2	176753831	176772031	AC016751.3	chr2	176748921	176751680	79	74	72	75
402624	chr2	239071229	239078324	AC016757.1	chr2	238864019	238879844	50	12	10	24
402624	chr2	239071229	239078324	AC016757.1	chr2	239087286	239087476	278	159	245	227.333
402642	chr2	239134204	239140787	AC016757.3	chr2	239123968	239133132	599	303	322	408
366294	chr2	121791158	121792988	AC016764.1	chr2	121462012	121471480	34	15	9	19.3333
366294	chr2	121791158	121792988	AC016764.1	chr2	121783120	121789585	305	165	241	237
84141	chr10	71123308	71123624	AC016821.1	chr10	70737517	70747351	30	21	19	23.3333
340543	chr2	30272929	30289656	AC016907.1	chr2	29500109	29515202	4	2	3	3
340543	chr2	30272929	30289656	AC016907.1	chr2	30266093	30272791	87	39	38	54.6667
340567	chr2	30360487	30371449	AC016907.3	chr2	30352632	30358167	669	441	168	426
340567	chr2	30360487	30371449	AC016907.3	chr2	31431087	31443387	13	10	3	8.66667
369677	chr2	133668372	133676225	AC016909.1	chr2	133666107	133668357	200	112	181	164.333
373216	chr2	144693938	144696604	AC016910.1	chr2	144691190	144702317	339	669	500	502.667
362101	chr2	107450623	107450921	AC016994.2	chr2	107442758	107448934	609	214	446	423
345328	chr2	46304451	46309557	AC017006.2	chr2	46310912	46311543	614	374	339	442.333
345328	chr2	46304451	46309557	AC017006.2	chr2	46585062	46598734	51	15	29	31.6667
345348	chr2	46389475	46395336	AC017006.3	chr2	46381656	46400559	194	116	129	146.333
402862	chr2	240081688	240090513	AC017028.1	chr2	240074944	240076479	639	289	419	449
333905	chr2	6970754	6982777	AC017076.5	chr2	6985251	6987576	221	128	98	149
333905	chr2	6970754	6982777	AC017076.5	chr2	8343899	8357299	3	4	2	3
352276	chr2	68499363	68503707	AC017083.2	chr2	67610331	67627450	3	4	2	3
352276	chr2	68499363	68503707	AC017083.2	chr2	68493845	68510110	693	463	343	499.667
352265	chr2	68458547	68461186	AC017083.3	chr2	68461489	68470616	304	334	182	273.333
352865	chr2	70678061	70686539	AC017084.1	chr2	70687532	70690404	709	392	575	558.667
400909	chr2	232316580	232318550	AC017104.2	chr2	231702295	231713086	13	17	14	14.6667
400909	chr2	232316580	232318550	AC017104.2	chr2	232087517	232091108	123	85	77	95
400909	chr2	232316580	232318550	AC017104.2	chr2	232321430	232332442	433	978	182	531
479226	chr3	142882975	142887640	AC018450.1	chr3	142878225	142881146	528	359	373	420
479226	chr3	142882975	142887640	AC018450.1	chr3	143552325	143563881	12	4	9	8.33333
239155	chr15	33249877	33256595	AC018515.1	chr15	32955813	32962148	29	18	29	25.3333
239155	chr15	33249877	33256595	AC018515.1	chr15	33990396	34006245	6	4	5	5
266914	chr16	34679928	34683109	AC018558.1	chr16	34671804	34675019	239	135	132	168.667
292694	chr17	60089008	60102448	AC018628.1	chr17	60077580	60079028	168	104	108	126.667
699535	chr7	131010766	131014763	AC018642.1	chr7	130786246	130793407	63	25	39	42.3333
699535	chr7	131010766	131014763	AC018642.1	chr7	131003994	131023103	260	205	333	266
699794	chr7	131943941	131947790	AC018643.4	chr7	131948310	131948704	57	72	49	59.3333
699794	chr7	131943941	131947790	AC018643.4	chr7	132259760	132269149	9	6	8	7.66667
374302	chr2	147889185	147892764	AC018678.1	chr2	147885683	147887507	307	230	277	271.333
345424	chr2	46655549	46657113	AC018682.6	chr2	46667091	46667527	127	75	60	87.3333
359967	chr2	100113943	100156231	AC018690.1	chr2	100160335	100161102	181	125	106	137.333
359967	chr2	100113943	100156231	AC018690.1	chr2	100433114	100445767	24	13	11	16
343143	chr2	39088831	39090117	AC018693.6	chr2	39074302	39081661	168	129	116	137.667
343143	chr2	39088831	39090117	AC018693.6	chr2	39469526	39478503	20	9	8	12.3333
676445	chr7	50592159	50601327	AC018705.5	chr7	50601846	50602819	11	8	7	8.66667
361565	chr2	105466818	105475583	AC018730.1	chr2	104641586	104655141	5	3	4	4
361565	chr2	105466818	105475583	AC018730.1	chr2	105731003	105747565	17	6	10	11
330583	chr19	52089926	52098767	AC018755.11	chr19	52087690	52089281	595	376	316	429
438393	chr3	4922743	4934001	AC018816.3	chr3	4937141	4937511	176	122	111	136.333
387032	chr2	187359727	187364693	AC018867.1	chr2	186596081	186603302	16	3	9	9.33333
387032	chr2	187359727	187364693	AC018867.1	chr2	187366424	187367453	536	329	224	363
361926	chr2	106795423	106796052	AC018878.3	chr2	105956689	105964553	10	5	7	7.33333
361926	chr2	106795423	106796052	AC018878.3	chr2	106786380	106800312	352	387	348	362.333
333985	chr2	7217303	7221612	AC019048.1	chr2	6957059	6970753	27	20	9	18.6667
333985	chr2	7217303	7221612	AC019048.1	chr2	7207343	7214782	133	170	169	157.333
675603	chr7	47800071	47804453	AC019066.3	chr7	47290882	47306676	20	10	32	20.6667
675603	chr7	47800071	47804453	AC019066.3	chr7	47806336	47814994	247	132	194	191
402141	chr2	237296564	237304237	AC019068.2	chr2	237306671	237314185	118	63	122	101
362535	chr2	108833744	108836074	AC019100.3	chr2	108842528	108843128	296	189	276	253.667
362535	chr2	108833744	108836074	AC019100.3	chr2	109179109	109188111	24	11	25	20
526103	chr4	99846712	99851952	AC019131.1	chr4	99390463	99399505	62	45	18	41.6667
526103	chr4	99846712	99851952	AC019131.1	chr4	99572385	99591580	27	31	39	32.3333
526103	chr4	99846712	99851952	AC019131.1	chr4	99840584	99845607	424	291	234	316.333
380114	chr2	165693725	165698989	AC019181.2	chr2	165687468	165693555	319	169	46	178
377739	chr2	158296257	158299768	AC019201.1	chr2	158291613	158292036	295	318	221	278
287489	chr17	39649147	39660161	AC019349.5	chr17	39660237	39664326	85	47	35	55.6667
341543	chr2	33788111	33788883	AC020594.5	chr2	32996155	33008656	20	8	7	11.6667
341543	chr2	33788111	33788883	AC020594.5	chr2	33781772	33796820	607	468	282	452.333
443967	chr3	23808200	23812125	AC020626.1	chr3	23816719	23833516	172	75	73	106.667
481794	chr3	150635201	150636310	AC020636.1	chr3	150637644	150644971	731	500	366	532.333
543852	chr4	154792622	154798776	AC020703.1	chr4	154799013	154812092	348	303	260	303.667
676327	chr7	50175558	50188164	AC020743.2	chr7	50479281	50494764	61	41	26	42.6667
273813	chr16	70779902	70791759	AC020763.1	chr16	70794120	70795672	655	363	431	483
273813	chr16	70779902	70791759	AC020763.1	chr16	71396513	71403920	8	8	6	7.33333
584894	chr5	95919184	95927048	AC020900.1	chr5	95202959	95215457	6	8	12	8.66667
584894	chr5	95919184	95927048	AC020900.1	chr5	95928967	95938085	102	79	87	89.3333
331331	chr19	55892329	55898826	AC020922.1	chr19	55900438	55904871	709	326	265	433.333
157136	chr12	52641149	52659404	AC021066.1	chr12	52665279	52665687	181	81	136	132.667
601303	chr5	148978642	148996459	AC021078.1	chr5	149191947	149208142	60	25	47	44
601303	chr5	148978642	148996459	AC021078.1	chr5	149360139	149376554	18	15	16	16.3333
359137	chr2	96986565	96990459	AC021188.4	chr2	97002287	97008828	540	246	323	369.667
706512	chr7	155755323	155756273	AC021218.2	chr7	155757904	155763205	328	117	299	248
296762	chr17	76103774	76107152	AC021593.1	chr17	76685639	76705146	6	4	3	4.33333
114242	chr11	39881609	39884051	AC021749.1	chr11	39871850	39877464	36	39	112	62.3333
249936	chr15	70069866	70077900	AC021818.1	chr15	70079155	70079963	49	29	24	34
72602	chr10	28596640	28600773	AC022021.1	chr10	27814879	27828868	9	8	5	7.33333
72602	chr10	28596640	28600773	AC022021.1	chr10	28601051	28601784	292	215	152	219.667
604808	chr5	160656676	160657354	AC022120.1	chr5	160658183	160660551	203	150	154	169
585597	chr5	97974926	97975107	AC022142.1	chr5	96729437	96746992	16	10	11	12.3333
585597	chr5	97974926	97975107	AC022142.1	chr5	97969768	97980057	984	548	318	616.667
328088	chr19	38028682	38042885	AC022148.1	chr19	36884540	36903512	5	5	7	5.66667
328088	chr19	38028682	38042885	AC022148.1	chr19	38024565	38028144	120	74	102	98.6667
701523	chr7	137636045	137645086	AC022173.2	chr7	137633112	137634388	173	247	212	210.667
322186	chr19	12162841	12171530	AC022415.4	chr19	11904541	11908075	31	15	9	18.3333
322186	chr19	12162841	12171530	AC022415.4	chr19	12155576	12157059	168	91	102	120.333
322205	chr19	12262669	12269340	AC022415.5	chr19	11904541	11917536	23	9	10	14
322205	chr19	12262669	12269340	AC022415.5	chr19	11993788	11999892	13	13	6	10.6667
322205	chr19	12262669	12269340	AC022415.5	chr19	12256018	12256716	155	112	114	127
572142	chr5	55901742	55902125	AC022431.2	chr5	55897503	55906099	794	524	440	586
572142	chr5	55901742	55902125	AC022431.2	chr5	56120458	56124361	50	26	22	32.6667
572142	chr5	55901742	55902125	AC022431.2	chr5	56535802	56549181	13	7	4	8
493457	chr3	187889620	187901214	AC022498.1	chr3	187889169	187905249	165	223	450	279.333
84386	chr10	72191639	72194631	AC022532.1	chr10	72172619	72183766	531	215	278	341.333
84386	chr10	72191639	72194631	AC022532.1	chr10	73295313	73314789	5	3	6	4.66667
83094	chr10	67465854	67473870	AC022538.1	chr10	67476847	67485577	215	176	140	177
258206	chr15	100257875	100263888	AC022692.1	chr15	99808166	99816141	12	9	15	12
258206	chr15	100257875	100263888	AC022692.1	chr15	100265274	100269324	49	23	38	36.6667
250599	chr15	72339044	72344992	AC022872.1	chr15	72333323	72337095	279	225	166	223.333
258642	chr15	101816805	101818647	AC023024.1	chr15	101810931	101815534	703	628	208	513
258642	chr15	101816805	101818647	AC023024.1	chr15	101988804	101995872	38	43	24	35
258642	chr15	101816805	101818647	AC023024.1	chr15	102179537	102192118	104	80	41	75
151332	chr12	32052599	32069592	AC023050.1	chr12	32070817	32071847	343	109	91	181
724625	chr8	61604423	61604944	AC023102.1	chr8	60952539	60972267	8	8	2	6
724625	chr8	61604423	61604944	AC023102.1	chr8	61608679	61615070	427	398	203	342.667
724625	chr8	61604423	61604944	AC023102.1	chr8	61932382	61935041	51	26	29	35.3333
710112	chr8	9944105	9953342	AC023385.1	chr8	9209038	9228611	5	2	2	3
710112	chr8	9944105	9953342	AC023385.1	chr8	9954730	9955535	544	326	369	413
375670	chr2	151904591	151906592	AC023469.1	chr2	151899826	151904209	215	140	153	169.333
375640	chr2	151836635	151846615	AC023469.2	chr2	151831327	151835553	199	110	177	162
149093	chr12	25157789	25161205	AC023510.1	chr12	25147901	25167420	86	74	145	101.667
154376	chr12	42465506	42487837	AC023513.1	chr12	41665595	41673355	5	5	7	5.66667
154376	chr12	42465506	42487837	AC023513.1	chr12	41919145	41929184	11	4	3	6
154376	chr12	42465506	42487837	AC023513.1	chr12	42488938	42492973	257	207	159	207.667
154376	chr12	42465506	42487837	AC023513.1	chr12	42733820	42737783	14	10	14	12.6667
742924	chr8	119292651	119294751	AC023590.1	chr8	119297654	119298885	522	345	424	430.333
474737	chr3	127381579	127388663	AC023593.1	chr3	127375071	127377633	346	320	275	313.667
474737	chr3	127381579	127388663	AC023593.1	chr3	127678848	127688403	52	16	35	34.3333
496054	chr3	196359104	196362168	AC023797.1	chr3	196351848	196356134	322	186	137	215
443378	chr3	21871007	21871666	AC023798.1	chr3	21876103	21884494	156	201	213	190
267666	chr16	48438126	48458019	AC023818.1	chr16	48427942	48428546	63	49	44	52
438019	chr3	3684100	3692160	AC024158.1	chr3	3694764	3697603	398	247	296	313.667
438019	chr3	3684100	3692160	AC024158.1	chr3	4316416	4328884	17	10	8	11.6667
438276	chr3	4529815	4535454	AC024168.2	chr3	3214278	3219513	13	3	6	7.33333
438276	chr3	4529815	4535454	AC024168.2	chr3	4523503	4540592	333	340	135	269.333
529987	chr4	111774326	111779159	AC024198.1	chr4	111781077	111783865	209	167	173	183
706125	chr7	154401097	154403856	AC024239.1	chr7	154404307	154407745	160	135	185	160
253577	chr15	83875407	83891067	AC024270.1	chr15	83514318	83515743	17	5	10	10.6667
253577	chr15	83875407	83891067	AC024270.1	chr15	83865039	83870248	140	107	66	104.333
578945	chr5	77347429	77357513	AC024568.1	chr5	77357951	77358423	356	228	147	243.667
285696	chr17	32191778	32206026	AC024610.1	chr17	32178239	32189016	47	63	68	59.3333
151202	chr12	31476368	31479637	AC024940.1	chr12	30903467	30913833	21	12	10	14.3333
151202	chr12	31476368	31479637	AC024940.1	chr12	31470520	31473143	692	414	320	475.333
151202	chr12	31476368	31479637	AC024940.1	chr12	32844910	32857002	16	13	6	11.6667
275194	chr16	75731697	75740650	AC025287.1	chr16	75741413	75741737	39	26	23	29.3333
565207	chr5	33277548	33284831	AC025472.1	chr5	32703472	32706320	22	13	12	15.6667
565207	chr5	33277548	33284831	AC025472.1	chr5	33287852	33290323	297	170	150	205.667
160569	chr12	64495191	64497303	AC025576.1	chr12	64488458	64494136	136	216	314	222
698909	chr7	128540671	128551819	AC025594.1	chr7	128551827	128553573	56	54	89	66.3333
698909	chr7	128540671	128551819	AC025594.1	chr7	128730042	128735545	14	12	12	12.6667
246900	chr15	59179669	59185922	AC025918.2	chr15	59186625	59187545	421	251	275	315.667
246900	chr15	59179669	59185922	AC025918.2	chr15	59373166	59388565	29	23	19	23.6667
246900	chr15	59179669	59185922	AC025918.2	chr15	59945115	59957836	12	4	8	8
438481	chr3	5228182	5235779	AC026202.3	chr3	4359291	4368590	13	4	4	7
438481	chr3	5228182	5235779	AC026202.3	chr3	4527877	4540592	7	4	6	5.66667
438481	chr3	5228182	5235779	AC026202.3	chr3	5222852	5227503	265	150	123	179.333
438481	chr3	5228182	5235779	AC026202.3	chr3	5806945	5809038	18	12	3	11
151673	chr12	33194147	33213965	AC026357.1	chr12	33189243	33194066	226	143	124	164.333
151673	chr12	33194147	33213965	AC026357.1	chr12	34135111	34149227	5	3	3	3.66667
270835	chr16	59765131	59768934	AC026457.1	chr16	59752792	59760299	73	95	175	114.333
581301	chr5	84823412	84825128	AC026700.1	chr5	84361031	84378559	5	5	4	4.66667
581301	chr5	84823412	84825128	AC026700.1	chr5	84817729	84821570	177	215	94	162
565061	chr5	32784706	32790384	AC026703.1	chr5	33297003	33312812	18	18	12	16
556398	chr5	4297737	4306828	AC026711.1	chr5	4290626	4296598	266	165	197	209.333
583602	chr5	92051477	92053230	AC026781.1	chr5	92047177	92050654	91	90	102	94.3333
556981	chr5	6111603	6119622	AC026797.1	chr5	6121433	6131073	57	94	150	100.333
565711	chr5	34793158	34802761	AC026801.2	chr5	34790113	34809856	424	125	196	248.333
330163	chr19	49417733	49426104	AC026803.14	chr19	49408950	49417671	289	143	160	197.333
459584	chr3	76466794	76471364	AC026877.1	chr3	76472310	76478598	79	36	65	60
253171	chr15	82335167	82338934	AC026956.1	chr15	82229707	82244785	119	63	57	79.6667
253171	chr15	82335167	82338934	AC026956.1	chr15	82323796	82324699	292	147	147	195.333
743887	chr8	122195647	122200017	AC027238.1	chr8	122200980	122206492	363	150	242	251.667
743887	chr8	122195647	122200017	AC027238.1	chr8	122615715	122635156	10	4	3	5.66667
273841	chr16	70905383	70907438	AC027281.1	chr16	70907620	70909723	604	626	363	531
273841	chr16	70905383	70907438	AC027281.1	chr16	71169906	71180626	31	18	21	23.3333
280141	chr17	6907157	6920155	AC027763.2	chr17	6905755	6906113	254	182	96	177.333
253815	chr15	84652681	84659759	AC027807.1	chr15	84647930	84652419	210	126	202	179.333
525642	chr4	98402897	98412896	AC034154.1	chr4	98400583	98415433	366	104	352	274
601753	chr5	150747876	150751086	AC034205.1	chr5	150737302	150741708	342	197	226	255
596241	chr5	131346228	131348836	AC034228.2	chr5	130766034	130780544	16	4	9	9.66667
596241	chr5	131346228	131348836	AC034228.2	chr5	130922554	130930467	47	19	31	32.3333
596239	chr5	131338044	131341756	AC034228.3	chr5	130771559	130774147	20	7	8	11.6667
596239	chr5	131338044	131341756	AC034228.3	chr5	130922554	130930467	49	30	46	41.6667
596239	chr5	131338044	131341756	AC034228.3	chr5	131336834	131337290	511	431	339	427
596214	chr5	131268217	131282809	AC034228.4	chr5	131261826	131265850	187	145	137	156.333
591099	chr5	115378790	115379689	AC034236.1	chr5	114979226	114997236	37	9	19	21.6667
591099	chr5	115378790	115379689	AC034236.1	chr5	115380326	115388520	171	140	126	145.667
591095	chr5	115356251	115372004	AC034236.2	chr5	114979226	114994328	14	12	16	14
591095	chr5	115356251	115372004	AC034236.2	chr5	115374017	115375901	146	116	118	126.667
302299	chr18	18635617	18642649	AC036178.1	chr18	18643550	18643728	713	526	439	559.333
292982	chr17	61274653	61275321	AC037445.1	chr17	61275342	61278380	543	379	330	417.333
273082	chr16	67259494	67270530	AC040160.1	chr16	67251160	67251957	999	507	531	679
273211	chr16	67911016	67912047	AC040162.1	chr16	67916071	67917947	699	462	460	540.333
270739	chr16	59446558	59448694	AC040163.1	chr16	58858191	58866464	6	5	3	4.66667
270739	chr16	59446558	59448694	AC040163.1	chr16	59444585	59460740	85	140	69	98
296306	chr17	73965350	73987299	AC040980.1	chr17	73955271	73961639	29	26	57	37.3333
495562	chr3	194303099	194309010	AC046143.5	chr3	194187597	194206599	79	37	8	41.3333
723141	chr8	56948717	56962004	AC046176.1	chr8	56710047	56714811	33	19	27	26.3333
723141	chr8	56948717	56962004	AC046176.1	chr8	56966771	56977211	130	172	64	122
478432	chr3	140208298	140209898	AC048346.1	chr3	140212980	140215196	118	98	129	115
714052	chr8	23424387	23432475	AC051642.1	chr8	23421952	23436385	249	521	538	436
714052	chr8	23424387	23432475	AC051642.1	chr8	24055285	24071580	13	7	9	9.66667
397295	chr2	220285999	220296217	AC053503.6	chr2	220281350	220282393	525	242	378	381.667
533797	chr4	123537947	123541498	AC053545.3	chr4	122838930	122853418	9	12	9	10
533797	chr4	123537947	123541498	AC053545.3	chr4	123533137	123537856	402	289	269	320
480172	chr3	145614897	145620836	AC055758.1	chr3	145609970	145612529	332	234	233	266.333
496367	chr3	197556482	197564315	AC055764.1	chr3	197549761	197569420	204	126	176	168.667
287919	chr17	41825537	41827515	AC055813.1	chr17	41829311	41830707	558	344	396	432.667
257376	chr15	97632988	97635929	AC055873.1	chr15	97629146	97637603	191	139	165	165
376842	chr2	155538447	155554993	AC061961.2	chr2	155556747	155558879	54	27	15	32
296800	chr17	76309328	76312541	AC061992.2	chr17	76301432	76307691	165	79	143	129
402899	chr2	240319726	240332218	AC062017.1	chr2	240927592	240936127	24	8	6	12.6667
468478	chr3	107081833	107093293	AC063944.1	chr3	107100022	107103084	248	157	177	194
169924	chr12	92814194	92815377	AC063949.1	chr12	92543514	92559630	13	9	11	11
401989	chr2	236691274	236695891	AC064874.1	chr2	236698218	236700958	291	205	264	253.333
401989	chr2	236691274	236695891	AC064874.1	chr2	237962707	237976503	4	5	7	5.33333
364532	chr2	115913220	115921819	AC066593.1	chr2	115921898	115923060	176	125	154	151.667
81983	chr10	63684545	63688453	AC067742.1	chr10	63674801	63693656	317	171	112	200
81983	chr10	63684545	63688453	AC067742.1	chr10	63992842	64000181	11	10	13	11.3333
388463	chr2	191877639	191893225	AC067945.2	chr2	191894367	191896132	271	164	149	194.667
388463	chr2	191877639	191893225	AC067945.2	chr2	192525832	192539340	3	2	2	2.33333
344954	chr2	45009025	45016067	AC067957.1	chr2	45017910	45021292	267	167	232	222
382342	chr2	172626475	172635456	AC068039.4	chr2	172637224	172641586	24	24	11	19.6667
382342	chr2	172626475	172635456	AC068039.4	chr2	172954154	172963112	25	16	22	21
99947	chr10	125668607	125671456	AC068058.1	chr10	125671490	125673263	96	57	61	71.3333
381872	chr2	171196248	171202103	AC068280.1	chr2	170795302	170799173	27	14	8	16.3333
381872	chr2	171196248	171202103	AC068280.1	chr2	171202707	171203692	331	224	183	246
381872	chr2	171196248	171202103	AC068280.1	chr2	171655424	171664026	48	22	13	27.6667
333079	chr2	4267389	4278492	AC068292.1	chr2	4264333	4266008	342	251	199	264
709626	chr8	8238661	8248628	AC068353.1	chr8	8233683	8237389	866	509	694	689.667
709626	chr8	8238661	8248628	AC068353.1	chr8	8498460	8514933	45	21	33	33
320317	chr18	77421105	77447969	AC068473.1	chr18	77145131	77153597	11	5	7	7.66667
320317	chr18	77421105	77447969	AC068473.1	chr18	77451114	77458928	138	91	132	120.333
306561	chr18	32392811	32401125	AC068506.1	chr18	32387853	32406944	380	109	240	243
364436	chr2	115582385	115598189	AC068542.1	chr2	115005922	115020329	5	2	4	3.66667
364436	chr2	115582385	115598189	AC068542.1	chr2	115575446	115576776	117	93	107	105.667
746216	chr8	129821061	129833018	AC068570.1	chr8	128723345	128730920	16	12	12	13.3333
746216	chr8	129821061	129833018	AC068570.1	chr8	129834258	129839974	284	294	348	308.667
746216	chr8	129821061	129833018	AC068570.1	chr8	130540945	130548285	17	6	13	12
173309	chr12	103614315	103637450	AC068643.1	chr12	103608582	103611484	180	130	169	159.667
383691	chr2	177244837	177252725	AC068706.1	chr2	177244481	177244796	140	126	127	131
473287	chr3	122000412	122001729	AC068754.1	chr3	121821912	121830288	35	15	13	21
473287	chr3	122000412	122001729	AC068754.1	chr3	121995372	122010698	168	167	192	175.667
176945	chr12	117705814	117723821	AC068799.1	chr12	117726260	117727527	246	145	132	174.333
255575	chr15	91477137	91484708	AC068831.3	chr15	91474708	91475551	569	339	174	360.667
255575	chr15	91477137	91484708	AC068831.3	chr15	91812229	91823802	8	4	6	6
255583	chr15	91509387	91510054	AC068831.8	chr15	90873037	90880085	9	13	4	8.66667
255583	chr15	91509387	91510054	AC068831.8	chr15	91013169	91024799	10	5	7	7.33333
255583	chr15	91509387	91510054	AC068831.8	chr15	91511114	91518812	789	464	615	622.667
255583	chr15	91509387	91510054	AC068831.8	chr15	91808917	91815399	26	21	23	23.3333
482025	chr3	151349921	151356323	AC069067.1	chr3	151179997	151185966	36	26	20	27.3333
482025	chr3	151349921	151356323	AC069067.1	chr3	151345291	151349228	184	100	143	142.333
252377	chr15	79400377	79407603	AC069082.1	chr15	79397307	79416178	119	91	117	109
377951	chr2	159022782	159028219	AC069146.2	chr2	159029052	159031440	448	254	344	348.667
377951	chr2	159022782	159028219	AC069146.2	chr2	159598993	159604007	20	14	30	21.3333
365898	chr2	120301141	120311680	AC069154.2	chr2	120289773	120298728	169	86	114	123
495931	chr3	195963352	195978341	AC069257.8	chr3	195955685	195962453	292	210	164	222
662368	chr7	3445945	3459460	AC069286.1	chr7	3444252	3445205	314	167	180	220.333
705095	chr7	150280112	150283829	AC069304.1	chr7	150275823	150278790	361	186	205	250.667
286345	chr17	34405627	34410796	AC069363.1	chr17	34399130	34404284	579	260	286	375
248615	chr15	65130647	65137299	AC069368.3	chr15	65128476	65129851	638	340	297	425
353798	chr2	74206925	74215413	AC073046.4	chr2	74194255	74195810	70	46	44	53.3333
397188	chr2	219793126	219799268	AC073128.10	chr2	219789857	219790817	211	135	81	142.333
694906	chr7	115967531	115969615	AC073130.3	chr7	115971061	115972872	717	563	364	548
694906	chr7	115967531	115969615	AC073130.3	chr7	116414427	116425512	8	6	13	9
401154	chr2	233449164	233457454	AC073254.1	chr2	233448211	233468030	247	199	169	205
401154	chr2	233449164	233457454	AC073254.1	chr2	233882279	233885650	16	6	22	14.6667
340639	chr2	30654269	30656625	AC073255.1	chr2	30646643	30653889	481	618	464	521
340639	chr2	30654269	30656625	AC073255.1	chr2	31729495	31748706	6	3	3	4
353832	chr2	74361314	74362538	AC073263.1	chr2	74352611	74353398	663	378	263	434.667
345612	chr2	47292124	47300128	AC073283.7	chr2	47303572	47307245	224	149	238	203.667
666287	chr7	16755654	16766587	AC073333.8	chr7	16770673	16774015	39	19	32	30
702925	chr7	142977819	142989457	AC073342.12	chr7	142697097	142698830	15	8	9	10.6667
702925	chr7	142977819	142989457	AC073342.12	chr7	142989567	142991185	232	137	95	154.667
663042	chr7	6713226	6713790	AC073343.1	chr7	6716755	6722092	987	611	568	722
693863	chr7	112749478	112761357	AC073346.2	chr7	112575177	112583311	30	19	17	22
693863	chr7	112749478	112761357	AC073346.2	chr7	112745916	112765513	248	148	124	173.333
693985	chr7	113090855	113091667	AC073348.1	chr7	112365762	112383613	8	4	4	5.33333
693985	chr7	113090855	113091667	AC073348.1	chr7	113093926	113097109	634	293	397	441.333
97734	chr10	117874268	117880882	AC073588.1	chr10	117883334	117885370	220	151	271	214
789572	chrX	16393742	16396904	AC073597.1	chrX	16391314	16406218	72	92	56	73.3333
156385	chr12	49349427	49359771	AC073610.1	chr12	49373704	49376486	189	78	91	119.333
156382	chr12	49333266	49336024	AC073610.5	chr12	49636910	49648560	15	4	3	7.33333
296936	chr17	77021883	77025543	AC073624.1	chr17	77017137	77018704	540	309	464	437.667
296936	chr17	77021883	77025543	AC073624.1	chr17	77378304	77393682	34	19	21	24.6667
398675	chr2	224824290	224834357	AC073641.2	chr2	225139782	225157172	13	3	4	6.66667
398675	chr2	224824290	224834357	AC073641.2	chr2	225450854	225456812	7	10	3	6.66667
698602	chr7	127289511	127298661	AC073934.6	chr7	127318070	127318814	278	171	182	210.333
661961	chr7	1065596	1082452	AC073957.15	chr7	1084762	1087408	571	313	278	387.333
340130	chr2	28884399	28889659	AC074011.2	chr2	28881642	28894469	786	486	557	609.667
339846	chr2	27803057	27808708	AC074091.1	chr2	27798271	27812555	596	239	341	392
339877	chr2	27937293	27939466	AC074091.13	chr2	27929976	27935427	234	126	199	186.333
566793	chr5	38081824	38083520	AC074129.1	chr5	38083837	38085434	295	201	193	229.667
327872	chr19	37177995	37182425	AC074138.3	chr19	37165959	37176963	625	194	220	346.333
327872	chr19	37177995	37182425	AC074138.3	chr19	37713862	37714100	26	10	9	15
329646	chr19	46234256	46237240	AC074212.3	chr19	46237393	46252024	314	131	145	196.667
86653	chr10	80502066	80511954	AC074323.1	chr10	80954645	80969155	20	11	11	14
343114	chr2	38898412	38909430	AC074366.3	chr2	38915796	38920774	151	46	48	81.6667
662053	chr7	1725636	1738329	AC074389.6	chr7	1740465	1747974	356	191	340	295.667
662053	chr7	1725636	1738329	AC074389.6	chr7	2227615	2228230	42	17	25	28
351565	chr2	66267516	66273866	AC074391.1	chr2	66264710	66277603	264	158	59	160.333
473467	chr3	122644652	122651221	AC078794.1	chr3	122478517	122488244	13	9	11	11
487946	chr3	169484905	169489846	AC078802.1	chr3	168850219	168865687	8	3	10	7
487946	chr3	169484905	169489846	AC078802.1	chr3	169181787	169187933	7	8	10	8.33333
487946	chr3	169484905	169489846	AC078802.1	chr3	169664118	169677215	19	15	13	15.6667
173530	chr12	104371119	104380113	AC078819.2	chr12	104361086	104370716	161	116	129	135.333
371895	chr2	140576543	140584459	AC078851.1	chr2	140569969	140573539	32	12	29	24.3333
468812	chr3	108038255	108039759	AC078855.1	chr3	108040513	108041012	534	414	352	433.333
551532	chr4	178463156	178484989	AC078881.1	chr4	178486679	178487746	33	29	21	27.6667
382540	chr2	173322334	173335974	AC078883.3	chr2	173320118	173336525	190	214	116	173.333
323516	chr19	20470309	20485019	AC078899.1	chr19	20486319	20496997	30	16	51	32.3333
165619	chr12	79740605	79743724	AC078917.1	chr12	78565012	78573728	15	9	5	9.66667
165619	chr12	79740605	79743724	AC078917.1	chr12	79734916	79739975	305	174	150	209.667
488572	chr3	171524708	171529566	AC078953.1	chr3	171529628	171532213	309	363	153	275
488572	chr3	171524708	171529566	AC078953.1	chr3	171764952	171777210	18	5	14	12.3333
789546	chrX	16314814	16317457	AC078993.1	chrX	16308722	16324238	256	161	189	202
292355	chr17	58886757	58893300	AC079005.1	chr17	59383867	59394562	13	8	11	10.6667
553577	chr4	185188446	185189692	AC079080.1	chr4	185192718	185197299	295	264	103	220.667
553577	chr4	185188446	185189692	AC079080.1	chr4	185550571	185568671	80	40	31	50.3333
282725	chr17	16978636	16983801	AC079111.1	chr17	16988246	16990532	442	287	144	291
354689	chr2	77208622	77216846	AC079117.1	chr2	77221599	77224909	159	83	128	123.333
398493	chr2	224263734	224266318	AC079120.1	chr2	224258727	224262453	261	191	167	206.333
402089	chr2	237072120	237077830	AC079135.1	chr2	236679269	236691273	37	22	30	29.6667
402089	chr2	237072120	237077830	AC079135.1	chr2	237083864	237095013	368	163	100	210.333
367163	chr2	124782517	124786838	AC079154.1	chr2	124781520	124791415	392	233	174	266.333
383979	chr2	178125221	178130928	AC079305.10	chr2	178121984	178132575	453	548	253	418
383979	chr2	178125221	178130928	AC079305.10	chr2	178266242	178272170	45	23	39	35.6667
533539	chr4	122684930	122690839	AC079341.1	chr4	122695601	122702670	462	362	207	343.667
391924	chr2	202934826	202940082	AC079354.1	chr2	202947437	202950556	161	83	92	112
391938	chr2	202980380	202985289	AC079354.3	chr2	202989826	202990008	626	416	455	499
346189	chr2	49285223	49292457	AC079394.1	chr2	49295409	49296529	235	161	191	195.667
575701	chr5	66758677	66760941	AC079467.1	chr5	66750725	66755117	354	260	331	315
166800	chr12	83384835	83405777	AC079595.1	chr12	83381703	83381904	195	137	222	184.667
154748	chr12	43683570	43685885	AC079603.1	chr12	42873265	42886330	15	4	7	8.66667
154748	chr12	43683570	43685885	AC079603.1	chr12	43688991	43689899	231	164	115	170
402930	chr2	240498105	240505607	AC079612.1	chr2	240489044	240492650	239	137	190	188.667
363819	chr2	113594484	113606655	AC079753.1	chr2	113588495	113592712	308	205	159	224
332068	chr2	283104	287292	AC079779.4	chr2	274456	281360	321	201	180	234
332068	chr2	283104	287292	AC079779.4	chr2	1553448	1556131	9	6	5	6.66667
332043	chr2	196807	199069	AC079779.7	chr2	193264	194543	208	132	191	177
375973	chr2	152951975	152959709	AC079790.2	chr2	152942869	152945897	139	58	90	95.6667
375973	chr2	152951975	152959709	AC079790.2	chr2	153497150	153507175	10	5	12	9
685033	chr7	82975946	82984868	AC079799.2	chr7	82988136	82997004	71	76	28	58.3333
345866	chr2	48130849	48134742	AC079807.2	chr2	48126444	48128878	471	338	370	393
345866	chr2	48130849	48134742	AC079807.2	chr2	48326706	48334603	112	70	84	88.6667
345866	chr2	48130849	48134742	AC079807.2	chr2	48653874	48662848	29	17	23	23
397901	chr2	222383486	222389522	AC079834.1	chr2	221544632	221561918	30	4	9	14.3333
397901	chr2	222383486	222389522	AC079834.1	chr2	222377224	222396365	135	131	54	106.667
256471	chr15	94623753	94628327	AC080032.1	chr15	93622210	93627612	21	12	19	17.3333
256471	chr15	94623753	94628327	AC080032.1	chr15	94630701	94636030	641	194	413	416
295641	chr17	70708801	70720496	AC080037.1	chr17	70707427	70721412	189	148	79	138.667
295641	chr17	70708801	70720496	AC080037.1	chr17	70974158	70983347	46	5	4	18.3333
295641	chr17	70708801	70720496	AC080037.1	chr17	71169975	71187906	13	10	30	17.6667
391521	chr2	201449367	201453446	AC080164.1	chr2	200849163	200850004	32	22	24	26
391521	chr2	201449367	201453446	AC080164.1	chr2	201448050	201463014	510	285	397	397.333
166559	chr12	82730993	82739612	AC083811.1	chr12	82740038	82740268	31	37	29	32.3333
522659	chr4	89410331	89420622	AC083829.1	chr4	88066238	88084900	5	3	10	6
522659	chr4	89410331	89420622	AC083829.1	chr4	88607105	88615668	16	8	10	11.3333
522659	chr4	89410331	89420622	AC083829.1	chr4	89155453	89163801	90	27	51	56
522659	chr4	89410331	89420622	AC083829.1	chr4	89405633	89420884	798	373	503	558
700071	chr7	132945812	132952366	AC083875.1	chr7	132957355	132964254	231	113	183	175.667
700071	chr7	132945812	132952366	AC083875.1	chr7	133683271	133702926	8	3	5	5.33333
701905	chr7	139065368	139075747	AC083883.1	chr7	139077083	139077370	566	359	416	447
393663	chr2	208842013	208843327	AC083900.1	chr2	208621373	208628602	53	36	32	40.3333
393663	chr2	208842013	208843327	AC083900.1	chr2	208834890	208841104	265	233	317	271.667
726383	chr8	67024487	67035306	AC084082.3	chr8	67016525	67017807	142	89	68	99.6667
750347	chr8	145659910	145665922	AC084125.4	chr8	145674891	145676334	150	61	93	101.333
466658	chr3	101393991	101404832	AC084198.1	chr3	100444660	100454240	11	6	15	10.6667
466658	chr3	101393991	101404832	AC084198.1	chr3	101382774	101390264	586	115	95	265.333
715698	chr8	29122859	29136730	AC084262.1	chr8	29116227	29119371	84	24	31	46.3333
689166	chr7	95932648	95940705	AC084368.1	chr7	95928160	95944635	354	374	392	373.333
689166	chr7	95932648	95940705	AC084368.1	chr7	96323440	96331102	21	8	10	13
689166	chr7	95932648	95940705	AC084368.1	chr7	96649926	96653662	19	7	9	11.6667
285412	chr17	31202849	31210495	AC084809.2	chr17	31115299	31121863	113	61	48	74
285412	chr17	31202849	31210495	AC084809.2	chr17	31201229	31202799	263	171	170	201.333
704040	chr7	146593218	146593816	AC084872.1	chr7	146595122	146601239	348	242	124	238
243303	chr15	47534156	47536596	AC084882.1	chr15	47538175	47541120	287	312	354	317.667
672493	chr7	36680627	36688729	AC087069.1	chr7	36688740	36696508	458	254	277	329.667
672493	chr7	36680627	36688729	AC087069.1	chr7	37224933	37235480	26	13	11	16.6667
147537	chr12	20125723	20126936	AC087237.1	chr12	20120707	20131467	337	193	199	243
296278	chr17	73796527	73818604	AC087289.1	chr17	73819849	73836875	116	94	75	95
243225	chr15	47245893	47254578	AC087433.1	chr15	47255982	47256808	30	37	36	34.3333
251971	chr15	77540597	77547703	AC087465.1	chr15	77576959	77584713	16	9	7	10.6667
296791	chr17	76267001	76276392	AC087645.1	chr17	76277529	76287799	30	32	14	25.3333
253705	chr15	84280779	84287446	AC087738.1	chr15	84277125	84277590	337	181	212	243.333
239229	chr15	33484018	33489091	AC090098.1	chr15	33491032	33506130	412	372	568	450.667
239229	chr15	33484018	33489091	AC090098.1	chr15	34004678	34011222	24	17	18	19.6667
715125	chr8	27005062	27005677	AC090150.1	chr8	26537771	26556832	11	8	7	8.66667
715125	chr8	27005062	27005677	AC090150.1	chr8	27006817	27018017	175	473	312	320
721834	chr8	52724434	52732554	AC090186.1	chr8	52722151	52723562	73	61	58	64
303837	chr18	24166518	24173112	AC090206.1	chr18	24173212	24178396	142	112	106	120
279311	chr17	3123068	3134647	AC090282.1	chr17	3109107	3117407	32	14	39	28.3333
313771	chr18	55680797	55693307	AC090324.1	chr18	55675934	55693515	461	196	268	308.333
313771	chr18	55680797	55693307	AC090324.1	chr18	55796702	55814758	55	34	34	41
712737	chr8	18666233	18668800	AC090420.1	chr8	18672215	18682853	336	231	125	230.667
745368	chr8	127151267	127154067	AC090573.1	chr8	127154523	127159190	65	50	40	51.6667
285236	chr17	30470057	30470999	AC090616.2	chr17	29866423	29880605	12	6	8	8.66667
285236	chr17	30470057	30470999	AC090616.2	chr17	30466029	30466904	1033	678	461	724
279109	chr17	2114048	2121936	AC090617.1	chr17	2107095	2107556	201	124	117	147.333
288929	chr17	46371490	46372886	AC090627.1	chr17	46362614	46367918	354	423	213	330
288929	chr17	46371490	46372886	AC090627.1	chr17	46676325	46681579	50	28	18	32
441768	chr3	17175390	17191844	AC090644.1	chr3	16639661	16651818	21	15	11	15.6667
312165	chr18	50460944	50467526	AC090660.1	chr18	50475657	50476442	139	110	62	103.667
312537	chr18	51611202	51614655	AC090666.1	chr18	51615375	51622684	10	9	12	10.3333
161125	chr12	66251080	66251924	AC090673.1	chr12	66260437	66261550	223	153	72	149.333
237778	chr15	28018948	28025560	AC090696.2	chr15	28028833	28033319	210	127	181	172.667
258212	chr15	100287393	100293370	AC090825.2	chr15	100293926	100295205	140	92	72	101.333
440001	chr3	10522297	10523952	AC090841.1	chr3	10507859	10520144	152	78	209	146.333
441041	chr3	14689831	14693040	AC090952.5	chr3	13927601	13940372	13	9	3	8.33333
441041	chr3	14689831	14693040	AC090952.5	chr3	14680504	14689576	687	388	217	430.667
441041	chr3	14689831	14693040	AC090952.5	chr3	15251383	15259007	14	15	10	13
441154	chr3	15160779	15177920	AC090954.1	chr3	14964906	14974450	11	13	16	13.3333
441154	chr3	15160779	15177920	AC090954.1	chr3	15449848	15462721	18	10	15	14.3333
441077	chr3	14807934	14812919	AC090957.2	chr3	14805959	14807593	166	111	111	129.333
256259	chr15	93959264	93963637	AC091078.1	chr15	93971342	93972806	105	44	42	63.6667
734812	chr8	93647524	93656142	AC091096.1	chr8	93660603	93663651	108	73	96	92.3333
289089	chr17	47005121	47031529	AC091133.1	chr17	46992531	46996817	265	159	114	179.333
279604	chr17	4569753	4594037	AC091153.4	chr17	4561839	4562636	176	92	80	116
284937	chr17	29283181	29285996	AC091177.1	chr17	29280475	29281754	55	43	33	43.6667
102620	chr11	1521441	1540827	AC091196.1	chr11	1223607	1228547	41	23	27	30.3333
102620	chr11	1521441	1540827	AC091196.1	chr11	1514200	1515740	216	102	198	172
304816	chr18	27057839	27064484	AC091321.1	chr18	27050677	27056282	286	158	108	184
567064	chr5	38814977	38822802	AC091435.2	chr5	38430400	38438312	7	7	7	7
567064	chr5	38814977	38822802	AC091435.2	chr5	38808907	38809379	41	41	53	45
711701	chr8	15379224	15379628	AC091559.1	chr8	15375431	15376887	659	420	514	531
316449	chr18	64320625	64323102	AC091643.1	chr18	64313477	64320400	120	71	85	92
666794	chr7	18336829	18339704	AC091697.1	chr7	17802883	17810296	18	19	19	18.6667
666794	chr7	18336829	18339704	AC091697.1	chr7	18332789	18336780	391	244	275	303.333
669124	chr7	25608722	25612226	AC091705.1	chr7	25293290	25295285	40	32	22	31.3333
669124	chr7	25608722	25612226	AC091705.1	chr7	25430460	25433117	51	34	25	36.6667
669124	chr7	25608722	25612226	AC091705.1	chr7	25601689	25614431	391	80	238	236.333
669124	chr7	25608722	25612226	AC091705.1	chr7	25884737	25887840	39	23	17	26.3333
661967	chr7	1119003	1133678	AC091729.8	chr7	1139130	1142253	135	82	138	118.333
661984	chr7	1197010	1200280	AC091729.9	chr7	1193385	1194266	368	233	260	287
700809	chr7	135479401	135491267	AC091736.1	chr7	135495387	135503002	215	109	146	156.667
700809	chr7	135479401	135491267	AC091736.1	chr7	135693962	135697836	212	81	49	114
700785	chr7	135390691	135395993	AC091736.11	chr7	135404263	135406001	73	26	21	40
662304	chr7	3200654	3217536	AC091801.1	chr7	3219135	3223017	5	6	5	5.33333
571745	chr5	54478208	54482382	AC091977.1	chr5	54473684	54487375	179	117	136	144
53317	chr1	211373677	211385428	AC092017.1	chr1	211385739	211391727	196	132	126	151.333
689222	chr7	96132429	96133386	AC092031.1	chr7	95708779	95712666	28	15	12	18.3333
689222	chr7	96132429	96133386	AC092031.1	chr7	96133645	96141301	865	549	365	593
443863	chr3	23438751	23441692	AC092038.1	chr3	23430011	23435606	257	144	176	192.333
449824	chr3	42466644	42470502	AC092047.1	chr3	41936023	41940204	19	12	5	12
449824	chr3	42466644	42470502	AC092047.1	chr3	42475359	42485265	460	175	172	269
449822	chr3	42460470	42464729	AC092048.1	chr3	42470503	42476624	233	127	102	154
323272	chr19	19548703	19569634	AC092067.1	chr19	19534269	19534493	104	71	52	75.6667
259210	chr16	2790526	2791718	AC092117.1	chr16	2803685	2812644	237	130	177	181.333
259207	chr16	2757400	2769027	AC092117.2	chr16	2774465	2790525	105	60	76	80.3333
350521	chr2	62886472	62890963	AC092155.4	chr2	62694217	62703429	46	32	21	33
350521	chr2	62886472	62890963	AC092155.4	chr2	62894014	62903754	258	169	129	185.333
6386	chr1	30113931	30119220	AC092265.1	chr1	30123753	30133110	81	43	152	92
6386	chr1	30113931	30119220	AC092265.1	chr1	30779061	30797061	5	5	4	4.66667
324796	chr19	24176984	24192248	AC092279.1	chr19	24174560	24175164	212	139	193	181.333
324796	chr19	24176984	24192248	AC092279.1	chr19	24397716	24404050	4	2	3	3
324796	chr19	24176984	24192248	AC092279.1	chr19	24489189	24508893	4	3	4	3.66667
327837	chr19	37017641	37022231	AC092295.4	chr19	37010740	37013559	232	126	167	175
327847	chr19	37061433	37072661	AC092295.7	chr19	37058733	37059041	48	36	26	36.6667
324554	chr19	23437350	23451255	AC092329.1	chr19	24485932	24492593	4	5	3	4
278467	chr16	89001969	89011311	AC092384.1	chr16	89015142	89024679	330	179	202	237
496703	chr4	1134385	1146135	AC092535.3	chr4	1147179	1147789	41	26	34	33.6667
510353	chr4	47559161	47563599	AC092597.3	chr4	47554004	47568904	149	122	120	130.333
373134	chr2	144410041	144420884	AC092652.1	chr2	144402973	144409908	28	14	22	21.3333
360127	chr2	100718771	100723132	AC092667.2	chr2	100728261	100740797	55	32	72	53
351685	chr2	66666185	66670392	AC092669.4	chr2	65862250	65866249	16	5	5	8.66667
351685	chr2	66666185	66670392	AC092669.4	chr2	66672322	66683097	169	284	145	199.333
351685	chr2	66666185	66670392	AC092669.4	chr2	67627451	67633335	9	11	6	8.66667
359653	chr2	98968858	98974970	AC092675.3	chr2	98967280	98967579	240	194	255	229.667
359653	chr2	98968858	98974970	AC092675.3	chr2	99173127	99179615	17	9	9	11.6667
334933	chr2	10729203	10730544	AC092687.5	chr2	10719643	10736754	250	92	75	139
275798	chr16	77743478	77758893	AC092724.1	chr16	77739670	77743462	257	166	231	218
247016	chr15	59507189	59510619	AC092756.1	chr15	58708047	58726442	4	4	3	3.66667
246994	chr15	59443065	59446355	AC092757.1	chr15	58514565	58524550	12	5	4	7
246994	chr15	59443065	59446355	AC092757.1	chr15	59256467	59270436	23	16	25	21.3333
246994	chr15	59443065	59446355	AC092757.1	chr15	59450667	59458097	253	139	277	223
246994	chr15	59443065	59446355	AC092757.1	chr15	59783525	59799351	44	13	42	33
56736	chr1	222186067	222186868	AC092765.1	chr1	222190732	222199320	297	69	56	140.667
56736	chr1	222186067	222186868	AC092765.1	chr1	222611744	222620571	13	8	6	9
370824	chr2	137402452	137404553	AC092786.1	chr2	137406493	137406979	563	387	376	442
57694	chr1	225596388	225605175	AC092811.1	chr1	224596465	224607683	12	7	8	9
57694	chr1	225596388	225605175	AC092811.1	chr1	225589944	225592332	630	380	384	464.667
57694	chr1	225596388	225605175	AC092811.1	chr1	225952225	225956693	16	9	6	10.3333
57694	chr1	225596388	225605175	AC092811.1	chr1	226161582	226175453	19	30	23	24
25848	chr1	96351954	96358269	AC092812.1	chr1	96361735	96364721	35	30	32	32.3333
347983	chr2	54765447	54769186	AC092839.3	chr2	54771379	54774753	199	221	260	226.667
347983	chr2	54765447	54769186	AC092839.3	chr2	55402401	55413457	5	4	8	5.66667
347986	chr2	54772738	54774404	AC092839.4	chr2	54769187	54778585	290	188	68	182
379159	chr2	162774454	162776434	AC092841.1	chr2	162766811	162768668	336	228	239	267.667
503268	chr4	24419783	24424102	AC092846.1	chr4	23135980	23139107	50	22	31	34.3333
503268	chr4	24419783	24424102	AC092846.1	chr4	24424440	24427540	600	379	417	465.333
469150	chr3	109211192	109216733	AC092905.1	chr3	109194518	109208140	256	160	109	175
480834	chr3	147623803	147637757	AC092925.1	chr3	147639243	147644351	239	185	142	188.667
480894	chr3	147796068	147801751	AC092958.1	chr3	147075252	147083538	17	8	12	12.3333
480894	chr3	147796068	147801751	AC092958.1	chr3	147791224	147795619	199	152	152	167.667
488729	chr3	172028675	172038648	AC092964.1	chr3	171771779	171777210	48	32	31	37
488729	chr3	172028675	172038648	AC092964.1	chr3	172014327	172019217	280	166	324	256.667
495117	chr3	192875877	192886568	AC092966.1	chr3	192873269	192874539	168	147	168	161
178711	chr12	125737810	125747583	AC093028.1	chr12	125748955	125750459	230	124	184	179.333
348032	chr2	54888688	54892284	AC093110.3	chr2	54130040	54133326	16	8	9	11
348032	chr2	54888688	54892284	AC093110.3	chr2	54885565	54894395	681	495	552	576
348032	chr2	54888688	54892284	AC093110.3	chr2	55060027	55062617	72	42	49	54.3333
348032	chr2	54888688	54892284	AC093110.3	chr2	55404514	55410623	37	45	27	36.3333
357294	chr2	85520234	85532793	AC093162.1	chr2	85280999	85300451	14	8	4	8.66667
357294	chr2	85520234	85532793	AC093162.1	chr2	85541865	85545274	72	36	38	48.6667
357294	chr2	85520234	85532793	AC093162.1	chr2	85776014	85787961	9	3	6	6
400582	chr2	230989680	230999008	AC093171.1	chr2	231000602	231008677	189	120	150	153
400582	chr2	230989680	230999008	AC093171.1	chr2	231427008	231443477	16	9	13	12.6667
593250	chr5	122111880	122113314	AC093267.1	chr5	122103672	122117254	381	693	287	453.667
606980	chr5	167292237	167300942	AC093304.1	chr5	167305328	167306177	158	110	181	149.667
584199	chr5	93913103	93917429	AC093311.1	chr5	93902963	93912720	177	163	181	173.667
370607	chr2	136741463	136749415	AC093391.2	chr2	136735943	136754653	55	27	39	40.3333
370607	chr2	136741463	136749415	AC093391.2	chr2	136867487	136876755	11	6	14	10.3333
370607	chr2	136741463	136749415	AC093391.2	chr2	137126420	137141367	6	3	8	5.66667
440914	chr3	14185108	14187206	AC093495.4	chr3	14184209	14184377	389	330	141	286.667
440914	chr3	14185108	14187206	AC093495.4	chr3	14504553	14511821	16	11	7	11.3333
440914	chr3	14185108	14187206	AC093495.4	chr3	14689577	14695234	8	9	8	8.33333
582923	chr5	89769063	89774911	AC093510.2	chr5	89779895	89787223	232	168	199	199.667
260411	chr16	7939645	7955930	AC093515.1	chr16	7956364	7956725	55	36	55	48.6667
24976	chr1	93446633	93461668	AC093577.1	chr1	93464463	93465960	334	233	311	292.667
25013	chr1	93566378	93572383	AC093577.4	chr1	94325065	94344270	6	2	5	4.33333
403222	chr2	241949478	241961496	AC093585.6	chr2	241967796	241981793	292	167	167	208.667
440785	chr3	13687304	13698891	AC093611.1	chr3	13700088	13708148	68	50	52	56.6667
662823	chr7	5441213	5461830	AC093620.5	chr7	5470760	5471307	151	95	78	108
527860	chr4	105411790	105414767	AC093628.1	chr4	105409627	105419716	366	201	192	253
702951	chr7	143072636	143081630	AC093673.5	chr7	143085174	143085806	115	72	63	83.3333
528518	chr4	107332845	107343411	AC093680.1	chr4	107348141	107351517	95	45	48	62.6667
528518	chr4	107332845	107343411	AC093680.1	chr4	107818693	107832876	10	2	3	5
340046	chr2	28533312	28534163	AC093690.1	chr2	28530219	28531234	237	175	176	196
681097	chr7	68525974	68529366	AC093693.1	chr7	68518844	68525246	128	77	290	165
545554	chr4	159919519	159928740	AC093700.1	chr4	159913681	159932250	273	115	110	166
706203	chr7	154718902	154726320	AC093726.6	chr7	154713714	154717565	232	149	234	205
706203	chr7	154718902	154726320	AC093726.6	chr7	154981659	154985167	16	26	22	21.3333
706203	chr7	154718902	154726320	AC093726.6	chr7	155137996	155145656	29	26	25	26.6667
545072	chr4	158506469	158509536	AC093817.1	chr4	158510854	158513586	39	41	25	35
550952	chr4	176663921	176671121	AC093819.1	chr4	176672049	176683250	136	68	74	92.6667
395313	chr2	213625136	213630979	AC093865.1	chr2	214018498	214027168	44	18	25	29
519280	chr4	79107742	79110300	AC093897.1	chr4	79101967	79106651	428	324	345	365.667
19847	chr1	77854739	77859422	AC095030.1	chr1	77851305	77863244	500	365	422	429
513708	chr4	61524272	61536848	AC095061.1	chr4	61537368	61538025	113	79	96	96
373072	chr2	144232410	144239878	AC096558.1	chr2	144226688	144231440	317	192	115	208
377575	chr2	157786571	157789208	AC096589.1	chr2	157780267	157790160	193	246	158	199
50334	chr1	200111191	200115077	AC096633.1	chr1	199825410	199834336	15	3	8	8.66667
50334	chr1	200111191	200115077	AC096633.1	chr1	200119139	200125151	206	56	44	102
55934	chr1	219561338	219575438	AC096642.1	chr1	219557600	219560903	445	144	158	249
56017	chr1	219834718	219836813	AC096643.1	chr1	219837930	219842386	385	409	382	392
51294	chr1	203964633	203970158	AC096645.1	chr1	203950830	203961979	243	147	181	190.333
383373	chr2	176193018	176199329	AC096649.1	chr2	176191525	176204912	483	220	433	378.667
383373	chr2	176193018	176199329	AC096649.1	chr2	176931852	176940240	21	8	28	19
383373	chr2	176193018	176199329	AC096649.1	chr2	177595117	177612659	6	3	7	5.33333
350835	chr2	63919848	63925484	AC096664.1	chr2	63909821	63916529	145	101	118	121.333
350835	chr2	63919848	63925484	AC096664.1	chr2	64089509	64099006	148	68	47	87.6667
386396	chr2	185464323	185473477	AC096667.1	chr2	185474929	185477497	267	163	346	258.667
386396	chr2	185464323	185473477	AC096667.1	chr2	186596081	186602514	8	4	8	6.66667
363330	chr2	111872736	111883621	AC096670.3	chr2	111574535	111583733	26	16	26	22.6667
363330	chr2	111872736	111883621	AC096670.3	chr2	111884320	111886600	348	209	144	233.667
499451	chr4	12795948	12803998	AC096750.1	chr4	12804456	12807741	69	55	105	76.3333
457094	chr3	68678183	68687054	AC096922.1	chr3	68690230	68695434	180	128	233	180.333
457094	chr3	68678183	68687054	AC096922.1	chr3	68916483	68930230	7	8	6	7
457801	chr3	70926100	70934093	AC096971.1	chr3	70925240	70925618	248	160	179	195.667
452389	chr3	53241813	53245478	AC097015.1	chr3	53235357	53241366	348	161	122	210.333
445710	chr3	29049420	29053742	AC097361.1	chr3	29041636	29059116	98	54	118	90
445710	chr3	29049420	29053742	AC097361.1	chr3	29555287	29569917	4	2	3	3
541405	chr4	147043195	147043441	AC097372.1	chr4	146576565	146579753	11	9	6	8.66667
541405	chr4	147043195	147043441	AC097372.1	chr4	147044570	147045186	647	445	382	491.333
504236	chr4	27620878	27639303	AC097380.1	chr4	27618127	27618440	74	61	46	60.3333
498125	chr4	7939815	7944483	AC097381.1	chr4	7947463	7947763	129	111	76	105.333
543187	chr4	152482037	152487206	AC097455.1	chr4	152472315	152479783	367	134	233	244.667
543187	chr4	152482037	152487206	AC097455.1	chr4	152696344	152715778	18	11	16	15
543187	chr4	152482037	152487206	AC097455.1	chr4	153633789	153641941	2	4	2	2.66667
398350	chr2	223777367	223787348	AC097461.4	chr2	223163760	223176104	7	4	7	6
398350	chr2	223777367	223787348	AC097461.4	chr2	223553319	223569521	69	41	48	52.6667
544352	chr4	156273862	156277968	AC097467.2	chr4	155471796	155480034	23	12	9	14.6667
544352	chr4	156273862	156277968	AC097467.2	chr4	155726698	155734924	22	16	21	19.6667
544352	chr4	156273862	156277968	AC097467.2	chr4	155904092	155920794	15	12	15	14
544352	chr4	156273862	156277968	AC097467.2	chr4	156266289	156284072	214	147	227	196
352440	chr2	69050828	69060264	AC097495.2	chr2	68697017	68701343	53	26	42	40.3333
352440	chr2	69050828	69060264	AC097495.2	chr2	69061155	69061460	584	400	278	420.667
550110	chr4	174189057	174189493	AC097534.1	chr4	173932497	173938623	44	27	24	31.6667
550110	chr4	174189057	174189493	AC097534.1	chr4	174181415	174196639	495	353	87	311.667
340141	chr2	28944491	28960466	AC097724.3	chr2	28935222	28942704	195	112	98	135
388754	chr2	192782923	192787339	AC098617.1	chr2	192768391	192778520	105	18	46	56.3333
388741	chr2	192705523	192718847	AC098617.2	chr2	192428533	192431444	60	29	33	40.6667
388741	chr2	192705523	192718847	AC098617.2	chr2	192721161	192726826	383	250	193	275.333
388741	chr2	192705523	192718847	AC098617.2	chr2	193024389	193031660	71	17	44	44
445857	chr3	29407562	29412112	AC098650.1	chr3	29413584	29415326	221	177	217	205
24534	chr1	91851952	91860609	AC098691.1	chr1	91845151	91849670	252	161	151	188
499727	chr4	13656172	13660692	AC098830.1	chr4	13650699	13665232	14	26	8	16
314281	chr18	57412470	57418000	AC098847.1	chr18	57418401	57428367	78	72	204	118
508169	chr4	40462512	40474955	AC098869.1	chr4	40477753	40478016	210	140	170	173.333
388725	chr2	192653057	192660372	AC098872.3	chr2	192416521	192426285	15	9	6	10
388725	chr2	192653057	192660372	AC098872.3	chr2	192663020	192666109	88	52	48	62.6667
388725	chr2	192653057	192660372	AC098872.3	chr2	193024389	193033326	21	12	10	14.3333
543547	chr4	153818551	153824482	AC099339.1	chr4	153813657	153815435	561	396	264	407
543547	chr4	153818551	153824482	AC099339.1	chr4	154506804	154517130	16	11	17	14.6667
543547	chr4	153818551	153824482	AC099339.1	chr4	154651177	154670613	7	8	4	6.33333
277230	chr16	82868141	82877186	AC099506.1	chr16	82865930	82866322	175	135	120	143.333
445202	chr3	27397888	27406909	AC099535.1	chr3	27407980	27408625	180	90	175	148.333
445202	chr3	27397888	27406909	AC099535.1	chr3	27702290	27721880	23	9	5	12.3333
445202	chr3	27397888	27406909	AC099535.1	chr3	27950827	27967633	4	2	5	3.66667
450707	chr3	45632014	45645644	AC099539.1	chr3	45649911	45665906	282	184	119	195
446530	chr3	31435762	31437655	AC099540.1	chr3	31428085	31433009	265	369	147	260.333
455442	chr3	63318853	63324204	AC099545.1	chr3	63794366	63803172	22	17	22	20.3333
706283	chr7	154986672	154991769	AC099552.4	chr7	154984226	154985167	122	65	85	90.6667
63180	chr1	244744391	244757248	AC099757.1	chr1	244762038	244775152	130	264	461	285
63180	chr1	244744391	244757248	AC099757.1	chr1	245196609	245214746	21	14	19	18
313531	chr18	54813047	54831932	AC100775.1	chr18	54812549	54812947	113	89	117	106.333
297078	chr17	77782841	77807007	AC100791.2	chr17	77772911	77773716	249	140	139	176
713153	chr8	19931874	19944876	AC100802.3	chr8	19928804	19929280	264	175	245	228
749919	chr8	142516976	142519160	AC100803.1	chr8	142506248	142511549	55	27	30	37.3333
723044	chr8	56588559	56591225	AC100817.1	chr8	56580974	56581710	332	206	220	252.667
723044	chr8	56588559	56591225	AC100817.1	chr8	57002534	57010398	8	6	5	6.33333
291938	chr17	57066082	57069739	AC100832.1	chr17	56789380	56794944	33	10	4	15.6667
291938	chr17	57066082	57069739	AC100832.1	chr17	57060361	57062876	153	127	151	143.667
290175	chr17	51061277	51064056	AC102948.1	chr17	51053627	51054817	197	137	130	154.667
358796	chr2	95709112	95720490	AC103563.9	chr2	95705524	95707509	215	111	189	171.667
444689	chr3	25911297	25919877	AC103588.1	chr3	25679060	25687664	30	10	12	17.3333
444689	chr3	25911297	25919877	AC103588.1	chr3	25932449	25933961	101	38	80	73
444689	chr3	25911297	25919877	AC103588.1	chr3	26302388	26322270	9	3	4	5.33333
444689	chr3	25911297	25919877	AC103588.1	chr3	26752244	26762867	4	4	4	4
720594	chr8	48792847	48810864	AC103686.1	chr8	48181794	48186500	9	7	10	8.66667
720594	chr8	48792847	48810864	AC103686.1	chr8	48288446	48303479	7	10	8	8.33333
720594	chr8	48792847	48810864	AC103686.1	chr8	48788162	48791900	728	386	235	449.667
103314	chr11	4729406	4735188	AC103710.1	chr11	4719198	4725263	259	237	287	261
106788	chr11	16144657	16146562	AC103794.1	chr11	16139751	16151340	441	320	310	357
106788	chr11	16144657	16146562	AC103794.1	chr11	16480077	16490926	29	10	8	15.6667
106788	chr11	16144657	16146562	AC103794.1	chr11	16617656	16628041	29	15	7	17
108823	chr11	22634465	22649497	AC103801.2	chr11	22651345	22655001	69	33	31	44.3333
732162	chr8	85207952	85213374	AC103816.1	chr8	85203333	85206742	110	86	84	93.3333
116607	chr11	48028349	48056146	AC103828.1	chr11	48058970	48068998	166	122	133	140.333
742170	chr8	117142014	117149562	AC103863.1	chr8	117135908	117151753	366	306	348	340
256406	chr15	94438428	94443402	AC103996.1	chr15	94432952	94436339	236	223	323	260.667
728184	chr8	72743513	72744958	AC104012.1	chr8	71745349	71746505	24	9	9	14
728184	chr8	72743513	72744958	AC104012.1	chr8	72743037	72750014	410	336	299	348.333
728184	chr8	72743513	72744958	AC104012.1	chr8	72894424	72907640	80	15	57	50.6667
728184	chr8	72743513	72744958	AC104012.1	chr8	73056738	73068860	78	14	18	36.6667
282710	chr17	16890665	16896704	AC104024.2	chr17	16877118	16884108	38	22	34	31.3333
282710	chr17	16890665	16896704	AC104024.2	chr17	17075693	17076841	11	8	9	9.33333
385186	chr2	181844443	181846639	AC104076.3	chr2	180991774	181005429	20	24	15	19.6667
385186	chr2	181844443	181846639	AC104076.3	chr2	181849146	181857861	394	412	219	341.667
385186	chr2	181844443	181846639	AC104076.3	chr2	182333065	182341271	29	23	20	24
573565	chr5	60211231	60220325	AC104113.3	chr5	59975982	59984047	29	19	24	24
573565	chr5	60211231	60220325	AC104113.3	chr5	60220425	60222924	127	258	157	180.667
706483	chr7	155663991	155677017	AC104133.1	chr7	155677885	155678774	67	39	44	50
22313	chr1	85258626	85259072	AC104169.1	chr1	84584284	84592983	12	11	7	10
22313	chr1	85258626	85259072	AC104169.1	chr1	85261612	85261989	438	328	269	345
744023	chr8	122648732	122658380	AC104233.1	chr8	122280933	122284925	8	5	13	8.66667
744023	chr8	122648732	122658380	AC104233.1	chr8	122644083	122661555	106	112	112	110
255894	chr15	92514852	92521622	AC104236.1	chr15	92522399	92525785	102	121	110	111
734655	chr8	93179646	93180246	AC104339.1	chr8	93185666	93188052	47	130	57	78
734655	chr8	93179646	93180246	AC104339.1	chr8	93599582	93615082	5	5	4	4.66667
103466	chr11	5225324	5241469	AC104389.16	chr11	5217158	5218974	166	143	125	144.667
103466	chr11	5225324	5241469	AC104389.16	chr11	5819737	5835305	4	7	6	5.66667
369541	chr2	133277794	133288326	AC104405.1	chr2	133269016	133277337	156	147	218	173.667
750005	chr8	143021958	143030727	AC104417.1	chr8	143015715	143033360	188	245	170	201
450014	chr3	43250282	43252715	AC104434.1	chr3	43245388	43246365	421	298	340	353
450014	chr3	43250282	43252715	AC104434.1	chr3	43541838	43553218	44	31	19	31.3333
450014	chr3	43250282	43252715	AC104434.1	chr3	43774046	43788033	16	8	7	10.3333
443138	chr3	21174454	21180242	AC104441.1	chr3	21182786	21190628	23	29	15	22.3333
27352	chr1	100838675	100845342	AC104457.1	chr1	100845608	100847052	47	44	34	41.6667
483367	chr3	155459208	155463682	AC104472.1	chr3	154876759	154891622	12	6	7	8.33333
483367	chr3	155459208	155463682	AC104472.1	chr3	155084973	155095229	45	14	14	24.3333
483367	chr3	155459208	155463682	AC104472.1	chr3	155453754	155470079	368	396	351	371.667
336695	chr2	16702524	16708458	AC104623.2	chr2	16071575	16072330	49	20	38	35.6667
336695	chr2	16702524	16708458	AC104623.2	chr2	16697268	16715304	494	286	459	413
361637	chr2	105717464	105731002	AC104655.2	chr2	105732500	105739459	287	105	206	199.333
361637	chr2	105717464	105731002	AC104655.2	chr2	106137991	106146456	5	6	4	5
402498	chr2	238498712	238509861	AC104667.3	chr2	238492805	238512274	76	115	173	121.333
339308	chr2	25639818	25653459	AC104699.1	chr2	25633899	25637987	234	153	150	179
348062	chr2	54971580	54977395	AC104781.1	chr2	54978516	54978670	527	436	452	471.667
334824	chr2	10223532	10224297	AC104794.4	chr2	9940869	9947519	70	28	34	44
334824	chr2	10223532	10224297	AC104794.4	chr2	10235582	10242963	227	122	185	178
334824	chr2	10223532	10224297	AC104794.4	chr2	10571133	10585659	102	44	17	54.3333
334824	chr2	10223532	10224297	AC104794.4	chr2	10805903	10821253	29	23	18	23.3333
398750	chr2	225102992	225109926	AC104802.1	chr2	225098795	225099831	202	123	158	161
403204	chr2	241841318	241867093	AC104809.3	chr2	241868587	241870565	269	199	168	212
20214	chr1	79152520	79154652	AC104837.1	chr1	78606807	78617777	21	8	19	16
20214	chr1	79152520	79154652	AC104837.1	chr1	79147051	79159356	175	240	404	273
116513	chr11	47598873	47600306	AC104942.1	chr11	47594561	47605995	515	330	200	348.333
251518	chr15	75969902	75982214	AC105020.1	chr15	76208724	76215665	9	8	7	8
357407	chr2	86038814	86043064	AC105053.3	chr2	86028953	86038555	235	142	171	182.667
357407	chr2	86038814	86043064	AC105053.3	chr2	86295048	86309564	80	39	101	73.3333
313918	chr18	56133335	56134967	AC105105.1	chr18	56126002	56140865	336	181	249	255.333
248735	chr15	65667181	65670844	AC105129.1	chr15	65650002	65661148	312	194	247	251
304733	chr18	26776373	26778544	AC105245.1	chr18	26772775	26774159	33	34	16	27.6667
550092	chr4	174098090	174109628	AC105285.1	chr4	174094392	174095437	449	265	182	298.667
545658	chr4	160214977	160218478	AC105316.1	chr4	159626758	159632041	16	13	15	14.6667
545658	chr4	160214977	160218478	AC105316.1	chr4	160210017	160212922	368	235	302	301.667
340248	chr2	29320296	29330046	AC105398.3	chr2	29330875	29336316	122	83	94	99.6667
374895	chr2	149637499	149652244	AC105402.4	chr2	148699946	148712835	11	5	9	8.33333
374895	chr2	149637499	149652244	AC105402.4	chr2	149657894	149658134	144	92	136	124
401011	chr2	232861098	232882131	AC105461.1	chr2	232855342	232859104	376	259	259	298
402342	chr2	237963367	237973252	AC105760.3	chr2	236684094	236703097	7	4	4	5
402342	chr2	237963367	237973252	AC105760.3	chr2	237254007	237272999	16	10	34	20
402342	chr2	237963367	237973252	AC105760.3	chr2	237420945	237425836	34	7	18	19.6667
402342	chr2	237963367	237973252	AC105760.3	chr2	237973441	237974862	211	148	223	194
50055	chr1	199165329	199171424	AC105941.1	chr1	199158506	199173694	433	374	270	359
495696	chr3	194812046	194817485	AC106705.2	chr3	194400760	194416531	50	17	56	41
495696	chr3	194812046	194817485	AC106705.2	chr3	194806724	194810155	163	91	117	123.667
482217	chr3	151979492	151989579	AC106722.1	chr3	151971381	151975956	312	221	262	265
482217	chr3	151979492	151989579	AC106722.1	chr3	152161960	152163018	56	36	15	35.6667
273976	chr16	71361756	71371750	AC106736.1	chr16	71377005	71377261	179	120	119	139.333
603662	chr5	156984006	156994058	AC106801.1	chr5	156981351	156981872	79	22	37	46
546200	chr4	161923883	161926537	AC106860.1	chr4	161926932	161931458	34	36	64	44.6667
340491	chr2	30111991	30114675	AC106870.1	chr2	30105861	30119514	265	183	207	218.333
340496	chr2	30121640	30123897	AC106870.2	chr2	30119515	30124864	393	313	239	315
695116	chr7	116604326	116608061	AC106873.4	chr7	116608815	116619445	379	434	299	370.667
695116	chr7	116604326	116608061	AC106873.4	chr7	116765596	116768233	69	49	62	60
695116	chr7	116604326	116608061	AC106873.4	chr7	117825295	117837704	4	3	5	4
401269	chr2	233876686	233877947	AC106876.2	chr2	233881573	233885650	546	284	390	406.667
401269	chr2	233876686	233877947	AC106876.2	chr2	234672960	234683622	12	3	4	6.33333
179701	chr12	129149066	129161674	AC107020.1	chr12	129164450	129170123	146	86	73	101.667
480240	chr3	145779886	145782471	AC107021.1	chr3	145789724	145795853	262	104	195	187
480240	chr3	145779886	145782471	AC107021.1	chr3	145901746	145911413	105	53	33	63.6667
480240	chr3	145779886	145782471	AC107021.1	chr3	146045841	146050470	58	24	38	40
480240	chr3	145779886	145782471	AC107021.1	chr3	146304193	146305854	49	24	10	27.6667
510490	chr4	47974062	47978426	AC107068.1	chr4	47962449	47971200	177	78	151	135.333
350298	chr2	62094729	62096825	AC107081.5	chr2	61729124	61734059	50	21	17	29.3333
350298	chr2	62094729	62096825	AC107081.5	chr2	62099161	62104530	358	179	203	246.667
283207	chr17	19205690	19214834	AC107982.5	chr17	19199352	19202247	15	16	11	14
287675	chr17	40543687	40554702	AC107993.1	chr17	40477331	40487053	154	73	90	105.667
278766	chr17	262444	263865	AC108004.3	chr17	290033	293664	58	29	24	37
278766	chr17	262444	263865	AC108004.3	chr17	884621	888502	12	9	3	8
333573	chr2	5828892	5834630	AC108025.2	chr2	5837686	5838580	113	71	90	91.3333
333573	chr2	5828892	5834630	AC108025.2	chr2	6170213	6186942	3	5	2	3.33333
251126	chr15	74180278	74184835	AC108137.1	chr15	74185767	74199346	150	77	193	140
512044	chr4	56135731	56139818	AC108209.1	chr4	56131564	56141015	246	148	127	173.667
544649	chr4	157215059	157219250	AC108211.1	chr4	157223018	157227694	357	194	212	254.333
102890	chr11	3208601	3219519	AC108448.3	chr11	3226277	3228821	73	23	39	45
332335	chr2	1345434	1350653	AC108462.1	chr2	1351836	1353661	168	113	181	154
363370	chr2	111993002	112000145	AC108463.1	chr2	111988556	112002961	167	209	111	162.333
462089	chr3	84339096	84348796	AC108696.1	chr3	84350777	84353537	244	101	228	191
464946	chr3	96151680	96157352	AC108697.1	chr3	96146339	96160285	65	64	63	64
464867	chr3	95878375	95902979	AC108739.1	chr3	95903387	95907819	93	80	88	87
554364	chr4	187778610	187781422	AC108865.1	chr4	187775143	187784274	264	122	284	223.333
537959	chr4	136291196	136294250	AC108867.1	chr4	136289151	136294772	547	437	222	402
102897	chr11	3245576	3248332	AC109309.4	chr11	3250248	3257566	350	180	127	219
311655	chr18	48917605	48919292	AC109315.1	chr18	48923442	48925594	22	24	14	20
287833	chr17	41369970	41383064	AC109326.1	chr17	41367709	41368355	189	121	121	143.667
533933	chr4	123925124	123929327	AC109357.1	chr4	123929820	123935202	29	27	26	27.3333
573410	chr5	59724641	59730170	AC109486.1	chr5	59116718	59119277	17	10	10	12.3333
573410	chr5	59724641	59730170	AC109486.1	chr5	59733050	59738706	596	326	301	407.667
580803	chr5	83267748	83271718	AC109496.1	chr5	83272168	83274518	228	167	171	188.667
445563	chr3	28614815	28621005	AC109586.1	chr3	28622471	28624455	415	243	277	311.667
828773	chrX	149654590	149661925	AC109994.1	chrX	149122677	149139222	22	10	19	17
297372	chr17	79371698	79373802	AC110285.1	chr17	79364206	79381224	351	235	198	261.333
511666	chr4	54965701	54970271	AC110298.1	chr4	54974629	54975706	355	197	296	282.667
465380	chr3	97540233	97541685	AC110491.1	chr3	97537123	97544982	403	316	244	321
465380	chr3	97540233	97541685	AC110491.1	chr3	98060441	98072448	5	6	9	6.66667
512245	chr4	56793047	56801123	AC110611.1	chr4	56787431	56792886	217	120	126	154.333
512245	chr4	56793047	56801123	AC110611.1	chr4	57157883	57168391	43	25	11	26.3333
364136	chr2	114746134	114749226	AC110769.1	chr2	114743391	114750816	610	391	476	492.333
662075	chr7	1881075	1888085	AC110781.5	chr7	1892307	1902380	165	121	116	134
542917	chr4	151559524	151562309	AC110813.1	chr4	151558344	151564996	289	182	83	184.667
296612	chr17	75437247	75443481	AC111170.2	chr17	75433935	75453439	445	230	211	295.333
296612	chr17	75437247	75443481	AC111170.2	chr17	75715871	75727539	39	15	10	21.3333
296612	chr17	75437247	75443481	AC111170.2	chr17	76000788	76015679	37	9	13	19.6667
571624	chr5	54146426	54152522	AC112198.1	chr5	53542564	53550204	22	11	10	14.3333
571624	chr5	54146426	54152522	AC112198.1	chr5	54160352	54161925	180	96	128	134.667
458242	chr3	72310003	72312584	AC112219.1	chr3	72307422	72315615	558	561	247	455.333
458242	chr3	72310003	72312584	AC112219.1	chr3	72862020	72871088	26	17	11	18
518713	chr4	77413695	77421053	AC112249.1	chr4	77082679	77101441	17	16	20	17.6667
518713	chr4	77413695	77421053	AC112249.1	chr4	77410831	77412579	455	259	290	334.667
518713	chr4	77413695	77421053	AC112249.1	chr4	77941772	77957542	19	6	5	10
518713	chr4	77413695	77421053	AC112249.1	chr4	78126391	78133639	11	9	12	10.6667
518713	chr4	77413695	77421053	AC112249.1	chr4	78272402	78280143	8	8	7	7.66667
484822	chr3	159941781	159946589	AC112641.1	chr3	159936929	159938824	612	359	485	485.333
256227	chr15	93827543	93831528	AC112693.1	chr15	93831954	93841381	52	67	83	67.3333
402407	chr2	238165570	238166755	AC112715.2	chr2	238158032	238163112	336	395	448	393
402461	chr2	238332414	238337544	AC112721.1	chr2	238070671	238088757	35	13	23	23.6667
402461	chr2	238332414	238337544	AC112721.1	chr2	238338312	238346755	242	176	188	202
402461	chr2	238332414	238337544	AC112721.1	chr2	238686933	238703479	20	7	11	12.6667
792153	chrX	25224260	25224756	AC112778.1	chrX	25215248	25230177	215	173	70	152.667
332224	chr2	913159	919626	AC113607.3	chr2	1553448	1556131	13	5	3	7
565619	chr5	34524205	34527732	AC114302.1	chr5	34523009	34533227	307	254	160	240.333
29638	chr1	107988292	107992191	AC114491.1	chr1	107987092	107997464	179	222	159	186.667
29638	chr1	107988292	107992191	AC114491.1	chr1	108285635	108301354	26	5	7	12.6667
29664	chr1	108107960	108117229	AC114491.2	chr1	108101949	108105522	271	162	216	216.333
54405	chr1	215061912	215066242	AC114496.1	chr1	215056369	215072367	94	68	45	69
239795	chr15	35268876	35270916	AC114546.1	chr15	34514797	34532876	7	5	4	5.33333
239795	chr15	35268876	35270916	AC114546.1	chr15	35256363	35268545	249	62	78	129.667
239795	chr15	35268876	35270916	AC114546.1	chr15	35731448	35742514	8	9	3	6.66667
403356	chr2	242662180	242678739	AC114730.11	chr2	242679671	242684947	151	73	56	93.3333
403369	chr2	242751360	242773821	AC114730.3	chr2	242774857	242775643	203	136	104	147.667
403367	chr2	242732593	242750635	AC114730.5	chr2	242773822	242774856	95	48	47	63.3333
403360	chr2	242687424	242697786	AC114730.7	chr2	242010377	242024540	11	8	5	8
403360	chr2	242687424	242697786	AC114730.7	chr2	242679671	242684947	210	73	102	128.333
397470	chr2	221048114	221058160	AC114765.1	chr2	221058682	221062448	55	27	37	39.6667
352615	chr2	69681751	69695641	AC114772.1	chr2	69700707	69701858	466	193	315	324.667
402812	chr2	239893547	239896559	AC114788.1	chr2	239897341	239901242	293	236	201	243.333
553156	chr4	183741759	183750195	AC114798.1	chr4	183756002	183765171	155	34	114	101
332287	chr2	1151418	1158503	AC114808.2	chr2	1149270	1149817	247	105	250	200.667
332263	chr2	1060315	1064661	AC114808.3	chr2	1058457	1059170	440	310	352	367.333
332877	chr2	3486045	3506592	AC114810.5	chr2	3478499	3485249	31	27	44	34
445016	chr3	26792275	26802542	AC114877.1	chr3	25932449	25947851	7	2	3	4
568551	chr5	43185152	43196278	AC114947.1	chr5	43180409	43196768	91	44	43	59.3333
7424	chr1	34640946	34643851	AC115286.1	chr1	34637702	34640428	265	142	179	195.333
448767	chr3	38944444	38951566	AC116038.1	chr3	38940475	38942365	104	81	113	99.3333
448724	chr3	38841385	38841899	AC116038.2	chr3	38842218	38842942	976	754	708	812.667
735728	chr8	96689854	96691658	AC116154.1	chr8	96684256	96694707	35	35	43	37.6667
577435	chr5	72449259	72453718	AC116345.1	chr5	72455865	72456323	22	17	9	16
596348	chr5	131758776	131769186	AC116366.5	chr5	131778587	131781009	193	139	110	147.333
107092	chr11	17091057	17100015	AC116533.1	chr11	16808632	16822315	45	31	23	33
107092	chr11	17091057	17100015	AC116533.1	chr11	17100692	17115460	165	56	112	111
107092	chr11	17091057	17100015	AC116533.1	chr11	17520879	17537451	9	5	13	9
267020	chr16	35115511	35139004	AC116553.1	chr16	35100588	35105222	50	31	29	36.6667
332229	chr2	940123	949577	AC116614.1	chr2	954226	954884	193	95	135	141
473766	chr3	123780446	123789572	AC117401.1	chr3	123777406	123777562	314	222	301	279
491683	chr3	181417166	181417570	AC117415.1	chr3	181047216	181063207	41	26	21	29.3333
491683	chr3	181417166	181417570	AC117415.1	chr3	181410766	181415673	303	302	271	292
491683	chr3	181417166	181417570	AC117415.1	chr3	181971309	181975558	12	10	21	14.3333
491683	chr3	181417166	181417570	AC117415.1	chr3	182397963	182402805	36	36	19	30.3333
465027	chr3	96384810	96387175	AC117444.1	chr3	96378993	96381731	133	97	99	109.667
328558	chr19	40766703	40796739	AC118344.1	chr19	40902499	40902903	22	20	8	16.6667
328553	chr19	40699298	40714988	AC118344.2	chr19	40694580	40696027	57	29	28	38
351613	chr2	66464075	66469678	AC118345.1	chr2	67050461	67069449	11	8	10	9.66667
471204	chr3	115399992	115402594	AC119795.1	chr3	114814891	114825687	15	9	10	11.3333
471204	chr3	115399992	115402594	AC119795.1	chr3	114937056	114951640	19	7	7	11
471204	chr3	115399992	115402594	AC119795.1	chr3	115390566	115395263	224	127	102	151
727745	chr8	71482697	71503116	AC120194.1	chr8	71508116	71508285	90	76	80	82
526472	chr4	101043625	101058516	AC121157.1	chr4	101059184	101062535	69	56	47	57.3333
475606	chr3	130826902	130837187	AC121332.1	chr3	130819029	130824394	120	144	64	109.333
153499	chr12	39829256	39837434	AC121334.1	chr12	39816546	39827033	149	89	31	89.6667
153607	chr12	40199842	40205192	AC121336.1	chr12	40207519	40208088	33	26	25	28
282869	chr17	17672846	17689360	AC122129.3	chr17	17698134	17699250	108	55	43	68.6667
396347	chr2	216741724	216744901	AC122136.1	chr2	216745133	216746021	225	178	151	184.667
718766	chr8	39416581	39423158	AC123767.1	chr8	39413384	39413779	186	185	202	191
676389	chr7	50411807	50412756	AC124014.1	chr7	50248598	50256121	35	13	29	25.6667
676389	chr7	50411807	50412756	AC124014.1	chr7	50415143	50415515	497	366	222	361.667
403078	chr2	241200117	241204178	AC124861.1	chr2	241206747	241207818	633	388	379	466.667
162079	chr12	69180877	69189302	AC124890.1	chr12	69173345	69176394	175	113	121	136.333
392370	chr2	204626738	204632016	AC125238.1	chr2	204639327	204640270	121	68	40	76.3333
247930	chr15	62526730	62549847	AC126323.2	chr15	62518015	62521202	123	63	101	95.6667
297302	chr17	78971085	78980823	AC127496.1	chr17	78980928	78981412	81	43	88	70.6667
297311	chr17	78997936	79010374	AC127496.3	chr17	79013530	79016605	93	49	89	77
162203	chr12	69591231	69599811	AC127894.1	chr12	69588436	69589064	42	33	43	39.3333
280334	chr17	7977175	8003541	AC129492.6	chr17	7969230	7969570	63	45	18	42
264357	chr16	23763840	23767231	AC130454.2	chr16	23013504	23030898	6	6	8	6.66667
264357	chr16	23763840	23767231	AC130454.2	chr16	23769479	23770291	564	372	408	448
264357	chr16	23763840	23767231	AC130454.2	chr16	24033308	24047076	30	20	32	27.3333
273257	chr16	68089122	68097049	AC130462.1	chr16	68085697	68087371	128	68	35	77
550880	chr4	176387041	176398020	AC131094.1	chr4	176401618	176404985	106	105	79	96.6667
403380	chr2	242843557	242848582	AC131097.4	chr2	242835906	242836815	164	77	64	101.667
492276	chr3	183516859	183523613	AC131160.1	chr3	182843377	182861939	13	5	11	9.66667
492276	chr3	183516859	183523613	AC131160.1	chr3	183507780	183507981	256	142	156	184.667
163436	chr12	73184078	73184875	AC131213.1	chr12	73187116	73188449	310	195	99	201.333
715909	chr8	29786004	29791167	AC131254.1	chr8	29794086	29794987	61	56	27	48
102853	chr11	2965308	2972282	AC131971.3	chr11	2961720	2975464	550	291	236	359
274477	chr16	73016384	73022136	AC132068.1	chr16	72522547	72527773	21	9	11	13.6667
274477	chr16	73016384	73022136	AC132068.1	chr16	73008745	73013468	305	175	190	223.333
272921	chr16	66519353	66529046	AC132186.2	chr16	66544632	66555692	63	56	36	51.6667
112443	chr11	33899900	33906435	AC132216.1	chr11	34467287	34467766	27	14	10	17
387834	chr2	189955317	189968416	AC133106.2	chr2	189386915	189404748	5	9	4	6
387834	chr2	189955317	189968416	AC133106.2	chr2	190268027	190274708	13	13	12	12.6667
457589	chr3	70298072	70302999	AC134025.1	chr3	70294494	70305578	175	65	125	121.667
719888	chr8	43414177	43418398	AC134698.1	chr8	43418841	43419655	197	141	140	159.333
266023	chr16	31072183	31083126	AC135050.1	chr16	31057317	31061528	161	82	105	116
280384	chr17	8257967	8263924	AC135178.1	chr17	8656703	8675118	29	19	26	24.6667
710906	chr8	12807448	12809754	AC135352.1	chr8	12805189	12817800	76	91	93	86.6667
710902	chr8	12800533	12804685	AC135352.2	chr8	12805189	12807242	248	203	226	225.667
710902	chr8	12800533	12804685	AC135352.2	chr8	13518072	13523279	21	9	14	14.6667
285044	chr17	29701174	29707014	AC135724.1	chr17	29709316	29713800	816	491	448	585
285044	chr17	29701174	29707014	AC135724.1	chr17	30177316	30184497	37	20	24	27
266793	chr16	34255114	34258726	AC135776.1	chr16	34265823	34266208	319	198	127	214.667
443791	chr3	23241132	23244119	AC135966.1	chr3	23233940	23246589	62	38	29	43
163768	chr12	74292225	74298847	AC136188.1	chr12	74283154	74291699	67	81	74	74
237583	chr15	27393597	27407391	AC136896.1	chr15	27409684	27411227	344	213	183	246.667
278444	chr16	88792685	88818896	AC138028.1	chr16	88820275	88824029	42	26	22	30
170146	chr12	93474916	93491944	AC138123.1	chr12	93776209	93790828	12	8	8	9.33333
288181	chr17	43306627	43324157	AC138150.4	chr17	43326206	43328870	213	110	148	157
749920	chr8	142519161	142530635	AC138647.1	chr8	142533079	142534409	284	159	227	223.333
496640	chr4	735083	759154	AC139887.4	chr4	761564	762605	77	48	40	55
162180	chr12	69506135	69511963	AC139931.1	chr12	69501048	69503971	143	91	133	122.333
561665	chr5	21733658	21735868	AC140132.1	chr5	21724253	21738946	32	29	22	27.6667
518109	chr4	75513396	75516680	AC142293.3	chr4	75231523	75244368	29	16	5	16.6667
375142	chr2	150438437	150444007	AC144449.1	chr2	149396183	149400623	6	5	3	4.66667
375142	chr2	150438437	150444007	AC144449.1	chr2	149881394	149894507	9	5	11	8.33333
332394	chr2	1603355	1625382	AC144450.1	chr2	1629935	1633376	219	126	203	182.667
175312	chr12	111066104	111084198	AC144522.1	chr12	111094654	111095755	135	78	119	110.667
661852	chr7	228327	300135	AC145676.2	chr7	814534	815293	13	8	7	9.33333
661901	chr7	635611	645253	AC147651.4	chr7	627766	632358	107	50	35	64
288305	chr17	43919210	43926368	AC217771.1	chr17	43706838	43708723	65	19	32	38.6667
350892	chr2	64104232	64112794	ACA59.1	chr2	63914484	63919847	22	15	12	16.3333
350892	chr2	64104232	64112794	ACA59.1	chr2	64100307	64103426	146	85	129	120
384599	chr2	179886965	179893096	ACA59.2	chr2	179894402	179896296	646	395	433	491.333
261414	chr16	12389969	12395540	ACA64.1	chr16	12396786	12398066	698	470	549	572.333
807565	chrX	80101741	80119843	ACA64.4	chrX	80655521	80675429	2	2	2	2
809917	chrX	87399841	87404097	ACA64.5	chrX	87394281	87399455	258	94	227	193
448541	chr3	38172857	38183749	ACAA1	chr3	38169828	38170452	293	165	75	177.667
448541	chr3	38172857	38183749	ACAA1	chr3	38513114	38524566	32	22	13	22.3333
311213	chr18	47339155	47341273	ACAA2	chr18	46074225	46088966	10	7	13	10
311213	chr18	47339155	47341273	ACAA2	chr18	47009856	47015163	139	79	27	81.6667
311213	chr18	47339155	47341273	ACAA2	chr18	47336580	47349099	911	688	359	652.667
311213	chr18	47339155	47341273	ACAA2	chr18	47798131	47799465	35	16	12	21
286629	chr17	35760663	35771365	ACACA	chr17	35780172	35780940	371	189	177	245.667
476133	chr3	132377167	132380058	ACAD11	chr3	132252559	132259525	84	49	55	62.6667
476133	chr3	132377167	132380058	ACAD11	chr3	132372187	132385478	384	274	231	296.333
476133	chr3	132377167	132380058	ACAD11	chr3	132753609	132764432	12	9	6	9
394427	chr2	211086927	211091873	ACADL	chr2	210833767	210846942	39	19	26	28
177815	chr12	121162947	121185293	ACADS	chr12	121149255	121158544	330	79	80	163
280191	chr17	7114907	7125387	ACADVL	chr17	6928808	6942623	54	16	47	39
280191	chr17	7114907	7125387	ACADVL	chr17	7131682	7133291	645	283	473	467
255103	chr15	89345586	89351106	ACAN	chr15	89341277	89342888	183	125	172	160
495785	chr3	195162417	195166617	ACAP2	chr3	194197927	194212758	18	8	5	10.3333
495785	chr3	195162417	195166617	ACAP2	chr3	194388836	194400759	48	26	7	27
495785	chr3	195162417	195166617	ACAP2	chr3	195154264	195161326	688	822	451	653.667
133868	chr11	107982760	107992465	ACAT1	chr11	107975842	107978487	430	213	194	279
133868	chr11	107982760	107992465	ACAT1	chr11	108170702	108178227	21	14	13	16
133868	chr11	107982760	107992465	ACAT1	chr11	108524330	108526967	62	25	26	37.6667
658650	chr6	160181052	160182218	ACAT2	chr6	160167471	160172762	373	216	256	281.667
658650	chr6	160181052	160182218	ACAT2	chr6	160393691	160396459	29	10	5	14.6667
658650	chr6	160181052	160182218	ACAT2	chr6	160868333	160879160	6	3	12	7
57891	chr1	226364150	226376557	ACBD3	chr1	226377433	226384835	309	239	149	232.333
72272	chr10	27524501	27534566	ACBD5	chr10	27133500	27152473	14	14	8	12
72272	chr10	27524501	27534566	ACBD5	chr10	27803120	27814878	11	7	9	9
72272	chr10	27524501	27534566	ACBD5	chr10	28817094	28836007	6	10	5	7
44154	chr1	180471076	180472609	ACBD6	chr1	180464624	180475113	968	616	435	673
44154	chr1	180471076	180472609	ACBD6	chr1	180832729	180842448	99	31	26	52
68596	chr10	15129208	15136019	ACBD7	chr10	14228517	14241983	14	5	12	10.3333
68596	chr10	15129208	15136019	ACBD7	chr10	15115866	15117168	266	144	229	213
285779	chr17	32480180	32487023	ACCN1	chr17	32094458	32108258	65	46	29	46.6667
285779	chr17	32480180	32487023	ACCN1	chr17	32476548	32478654	598	419	542	519.667
285779	chr17	32480180	32487023	ACCN1	chr17	33456093	33467177	9	6	5	6.66667
705194	chr7	150744633	150756543	ACCN3	chr7	150765376	150766535	156	84	96	112
544517	chr4	156786207	156789057	ACCN5	chr4	156780779	156794671	81	41	60	60.6667
115636	chr11	44087024	44098121	ACCS	chr11	44098674	44113185	115	68	74	85.6667
115628	chr11	44068373	44071468	ACCSL	chr11	43586072	43595727	14	4	16	11.3333
115628	chr11	44068373	44071468	ACCSL	chr11	44075647	44078763	277	202	303	260.667
273170	chr16	67684481	67698216	ACD	chr16	67672322	67674057	370	178	140	229.333
293068	chr17	61548609	61558823	ACE	chr17	61524925	61538321	159	87	93	113
789319	chrX	15618031	15622794	ACE2	chrX	15614987	15617168	615	428	292	445
123873	chr11	76566181	76584526	ACER3	chr11	76584621	76591276	510	347	251	369.333
211384	chr14	23564580	23570049	ACIN1	chr14	23033233	23049709	18	18	7	14.3333
211384	chr14	23564580	23570049	ACIN1	chr14	24590136	24594229	15	11	6	10.6667
287563	chr17	40058447	40089242	ACLY	chr17	40049235	40052628	9	7	8	8
370315	chr2	135596054	135596900	ACMSD	chr2	135595006	135596020	581	399	233	404.333
689404	chr7	96743050	96746650	ACN9	chr7	96755483	96761066	159	97	103	119.667
689404	chr7	96743050	96746650	ACN9	chr7	97364480	97367791	19	9	8	12
689404	chr7	96743050	96746650	ACN9	chr7	97476503	97484255	45	22	25	30.6667
760862	chr9	32382623	32396972	ACO1	chr9	32375202	32376557	122	68	62	84
760862	chr9	32382623	32396972	ACO1	chr9	32561996	32572016	38	28	23	29.6667
760862	chr9	32382623	32396972	ACO1	chr9	32973781	32984455	15	25	9	16.3333
434973	chr22	41864756	41866344	ACO2	chr22	41859795	41869116	1017	465	921	801
12664	chr1	55000713	55017339	ACOT11	chr1	55023640	55025979	18	15	10	14.3333
579934	chr5	80686668	80693147	ACOT12	chr5	80695265	80698250	220	130	276	208.667
579934	chr5	80686668	80693147	ACOT12	chr5	81027311	81031696	14	5	13	10.6667
226924	chr14	74067920	74085906	ACOT6	chr14	74062500	74065766	7	6	6	6.33333
791762	chrX	23759553	23804082	ACOT9	chrX	23749292	23750063	86	60	58	68
453894	chr3	58521219	58523884	ACOX2	chr3	58303832	58316681	57	43	66	55.3333
453894	chr3	58521219	58523884	ACOX2	chr3	58506396	58511244	188	150	126	154.667
363233	chr2	111488837	111492524	ACOXL	chr2	111493412	111495462	523	364	267	384.667
332065	chr2	262406	274455	ACP1	chr2	261892	262247	235	162	145	180.667
332065	chr2	262406	274455	ACP1	chr2	448174	462735	12	8	5	8.33333
34692	chr1	147138865	147143119	ACP6	chr1	146740495	146749377	25	10	12	15.6667
34692	chr1	147138865	147143119	ACP6	chr1	147138009	147138770	383	302	239	308
34692	chr1	147138865	147143119	ACP6	chr1	147364472	147368932	44	25	18	29
478658	chr3	140945205	140948298	ACPL2	chr3	140954294	140955409	154	88	99	113.667
476015	chr3	132028649	132048569	ACPP	chr3	131501019	131513699	6	3	3	4
476015	chr3	132028649	132048569	ACPP	chr3	132049872	132056476	174	167	255	198.667
804890	chrX	70795538	70801743	ACRC	chrX	70607029	70618528	47	23	28	32.6667
804890	chrX	70795538	70801743	ACRC	chrX	70782235	70786089	144	84	67	98.3333
138900	chr11	125550752	125552321	ACRV1	chr11	125552385	125553682	75	59	40	58
252179	chr15	78498248	78537992	ACSBG1	chr15	78488049	78494869	75	40	44	53
321232	chr19	6126548	6136182	ACSBG2	chr19	6116890	6120225	207	154	186	182.333
278485	chr16	89154236	89165493	ACSF3	chr16	89165897	89169428	96	56	71	74.3333
553738	chr4	185746200	185769431	ACSL1	chr4	185771069	185771920	456	172	327	318.333
398337	chr2	223725185	223727564	ACSL3	chr2	223728226	223747125	180	189	145	171.333
96589	chr10	114130957	114134676	ACSL5	chr10	114135171	114147600	115	83	47	81.6667
263559	chr16	20708093	20710422	ACSM1	chr16	19918512	19936950	8	5	6	6.33333
263559	chr16	20708093	20710422	ACSM1	chr16	20703799	20707676	765	491	525	593.667
263559	chr16	20708093	20710422	ACSM1	chr16	21284499	21294070	12	7	11	10
263577	chr16	20775177	20776937	ACSM3	chr16	20779785	20781339	346	238	156	246.667
263577	chr16	20775177	20776937	ACSM3	chr16	21302864	21314194	8	8	10	8.66667
143647	chr12	7455402	7459564	ACSM4	chr12	7459871	7460634	499	364	373	412
143647	chr12	7455402	7459564	ACSM4	chr12	7599660	7606687	44	28	26	32.6667
143647	chr12	7455402	7459564	ACSM4	chr12	7772088	7773800	26	10	17	17.6667
410693	chr20	25036380	25043735	ACSS1	chr20	25015053	25026142	457	185	299	313.667
410693	chr20	25036380	25043735	ACSS1	chr20	25376453	25377812	36	16	30	27.3333
411846	chr20	33452578	33468129	ACSS2	chr20	33469650	33485998	29	31	29	29.6667
58667	chr1	229562492	229571968	ACTA1	chr1	229558678	229578071	446	250	179	291.667
89679	chr10	90751013	90752197	ACTA2	chr10	89617406	89637057	5	7	4	5.33333
89679	chr10	90751013	90752197	ACTA2	chr10	90748291	90756761	608	455	305	456
89679	chr10	90751013	90752197	ACTA2	chr10	90971551	90990846	92	21	32	48.3333
89679	chr10	90751013	90752197	ACTA2	chr10	91143093	91159226	18	10	17	15
572382	chr5	56777073	56779944	ACTBL2	chr5	56780341	56782306	401	317	312	343.333
572382	chr5	56777073	56779944	ACTBL2	chr5	57049566	57064062	22	8	13	14.3333
572382	chr5	56777073	56779944	ACTBL2	chr5	57751035	57752379	17	15	16	16
572382	chr5	56777073	56779944	ACTBL2	chr5	58117794	58131300	4	6	7	5.66667
239739	chr15	35080552	35095671	ACTC1	chr15	35074568	35077713	198	121	96	138.333
297383	chr17	79477581	79481510	ACTG1	chr17	79458958	79476197	164	83	46	97.6667
353783	chr2	74117980	74121856	ACTG2	chr2	74102686	74111121	233	54	168	151.667
491008	chr3	179278890	179288214	ACTL6A	chr3	179289235	179298803	54	134	130	106
690260	chr7	100242483	100267766	ACTL6B	chr7	100213972	100215536	21	24	26	23.6667
778003	chr9	111622012	111628859	ACTL7A	chr9	111631182	111641389	369	217	231	272.333
778002	chr9	111613777	111622011	ACTL7B	chr9	111628860	111631181	271	109	178	186
3783	chr1	18080410	18082292	ACTL8	chr1	18089207	18090853	90	51	79	73.3333
60733	chr1	236840537	236853707	ACTN2	chr1	236281366	236296878	9	13	13	11.6667
60733	chr1	236840537	236853707	ACTN2	chr1	236833292	236838968	397	275	263	311.667
222305	chr14	58662860	58667225	ACTR10	chr14	58668775	58671035	94	193	122	136.333
93543	chr10	104261258	104262550	ACTR1A	chr10	104257768	104261099	741	429	288	486
359466	chr2	98279112	98286492	ACTR1B	chr2	98289637	98299347	514	270	134	306
351318	chr2	65452489	65459470	ACTR2	chr2	65463141	65468870	287	156	174	205.667
351318	chr2	65452489	65459470	ACTR2	chr2	65655338	65662825	43	20	22	28.3333
364107	chr2	114645986	114651473	ACTR3	chr2	114505365	114517882	149	22	127	99.3333
705599	chr7	152450889	152457916	ACTR3B	chr7	151320915	151330964	16	6	11	11
705599	chr7	152450889	152457916	ACTR3B	chr7	151872033	151887528	49	20	12	27
705599	chr7	152450889	152457916	ACTR3B	chr7	152014034	152029175	60	23	13	32
705599	chr7	152450889	152457916	ACTR3B	chr7	152444176	152459327	328	521	205	351.333
412705	chr20	37372292	37382197	ACTR5	chr20	37386285	37390095	9	9	7	8.33333
172361	chr12	100584952	100596174	ACTR6	chr12	100576329	100579803	201	128	224	184.333
172361	chr12	100584952	100596174	ACTR6	chr12	100954575	100959249	25	10	19	18
452582	chr3	53915522	53924632	ACTR8	chr3	52943981	52959722	5	7	3	5
452582	chr3	53915522	53924632	ACTR8	chr3	53377292	53391921	22	19	19	20
487	chr1	2927637	2944794	ACTRT2	chr1	2923149	2925227	229	272	226	242.333
487	chr1	2927637	2944794	ACTRT2	chr1	3338276	3346908	45	17	50	37.3333
377870	chr2	158732161	158733757	ACVR1	chr2	158159175	158172395	11	7	10	9.33333
377870	chr2	158732161	158733757	ACVR1	chr2	158734287	158745016	309	271	111	230.333
377790	chr2	158474399	158485896	ACVR1C	chr2	158487433	158495006	133	251	138	174
374564	chr2	148599900	148603822	ACVR2A	chr2	148595658	148597634	515	353	271	379.667
448626	chr3	38487578	38496689	ACVR2B	chr3	38504919	38513113	37	11	21	23
452123	chr3	52010821	52018535	ACY1	chr3	52025404	52027078	218	106	158	160.667
121775	chr11	67417569	67429735	ACY3	chr11	67431098	67438454	160	78	123	120.333
121775	chr11	67417569	67429735	ACY3	chr11	67960125	67978992	3	2	3	2.66667
227286	chr14	75534123	75537115	ACYP1	chr14	75530876	75543553	1256	790	360	802
347868	chr2	54339451	54349206	ACYP2	chr2	54703888	54715707	41	12	20	24.3333
347868	chr2	54339451	54349206	ACYP2	chr2	55061465	55075649	23	6	8	12.3333
327676	chr19	36065800	36067544	AD000090.1	chr19	36061677	36064671	94	55	64	71
327667	chr19	36033658	36039398	AD000090.2	chr19	36041759	36046958	253	140	168	187
327701	chr19	36204880	36219241	AD000671.1	chr19	36189643	36200395	212	45	126	127.667
414361	chr20	43276192	43283807	ADA	chr20	43283892	43290243	294	211	330	278.333
533728	chr4	123295978	123300136	ADAD1	chr4	122845295	122861877	10	5	5	6.66667
533728	chr4	123295978	123300136	ADAD1	chr4	123303556	123317673	129	80	57	88.6667
277590	chr16	84221012	84225814	ADAD2	chr16	84116111	84121790	91	84	72	82.3333
277590	chr16	84221012	84225814	ADAD2	chr16	84512129	84522797	31	16	24	23.6667
246874	chr15	59040631	59042709	ADAM10	chr15	58003759	58014258	9	5	5	6.33333
246874	chr15	59040631	59042709	ADAM10	chr15	58619207	58628325	76	43	19	46
246874	chr15	59040631	59042709	ADAM10	chr15	59029945	59038284	572	574	268	471.333
246874	chr15	59040631	59042709	ADAM10	chr15	59217291	59220921	78	62	39	59.6667
246874	chr15	59040631	59042709	ADAM10	chr15	59399234	59401051	24	14	23	20.3333
288124	chr17	42832618	42839130	ADAM11	chr17	42827706	42831703	132	37	154	107.667
100589	chr10	128070588	128077489	ADAM12	chr10	128066210	128068664	341	151	192	228
100589	chr10	128070588	128077489	ADAM12	chr10	128418047	128425663	11	7	4	7.33333
334707	chr2	9689098	9699428	ADAM17	chr2	9705442	9720796	124	132	224	160
718773	chr8	39440950	39442904	ADAM18	chr8	39433678	39437796	175	157	118	150
603664	chr5	156995435	157004260	ADAM19	chr5	157007628	157008254	289	138	245	224
718854	chr8	39692762	39698179	ADAM2	chr8	39684995	39690035	178	205	239	207.333
226000	chr14	70998144	71002275	ADAM20	chr14	70995565	71008011	137	88	140	121.667
225974	chr14	70922915	70927901	ADAM21	chr14	70903352	70917894	9	7	4	6.66667
686488	chr7	87561215	87565620	ADAM22	chr7	87567907	87569692	71	70	43	61.3333
393191	chr2	207305427	207314172	ADAM23	chr2	207320209	207324414	151	68	94	104.333
33335	chr1	120431471	120440812	ADAM30	chr1	120444241	120453511	261	329	374	321.333
718616	chr8	38962142	38967986	ADAM32	chr8	38956180	38961990	236	156	204	198.667
714348	chr8	24297853	24300033	ADAM7	chr8	24292420	24303992	396	288	190	291.333
714331	chr8	24238062	24251886	ADAMDEC1	chr8	24253345	24255134	152	100	111	121
423843	chr21	28214457	28218321	ADAMTS1	chr21	28211715	28219896	464	247	212	307.667
423843	chr21	28214457	28218321	ADAMTS1	chr21	28930767	28942833	16	3	8	9
321597	chr19	8670773	8673929	ADAMTS10	chr19	8658751	8659414	219	74	108	133.667
565411	chr5	33890114	33892962	ADAMTS12	chr5	32857720	32876468	6	4	4	4.66667
565411	chr5	33890114	33892962	ADAMTS12	chr5	33507413	33520378	20	7	12	13
565411	chr5	33890114	33892962	ADAMTS12	chr5	33894702	33904906	176	422	326	308
784309	chr9	136267204	136280614	ADAMTS13	chr9	136858311	136874972	6	5	5	5.33333
84439	chr10	72429875	72440931	ADAMTS14	chr10	72418497	72418649	56	38	71	55
140331	chr11	130316168	130326205	ADAMTS15	chr11	129734531	129744847	11	5	9	8.33333
140331	chr11	130316168	130326205	ADAMTS15	chr11	130723356	130729393	103	42	47	64
258385	chr15	100880331	100885379	ADAMTS17	chr15	100460399	100479726	6	11	9	8.66667
275710	chr16	77464853	77472366	ADAMTS18	chr16	77456906	77475866	327	94	173	198
595462	chr5	128791627	128798272	ADAMTS19	chr5	128449484	128459592	8	5	9	7.33333
595462	chr5	128791627	128798272	ADAMTS19	chr5	128800189	128811639	251	174	195	206.667
595462	chr5	128791627	128798272	ADAMTS19	chr5	129092578	129095075	22	19	20	20.3333
609982	chr5	178767617	178777381	ADAMTS2	chr5	178778518	178786443	282	143	198	207.667
154827	chr12	43942186	43950458	ADAMTS20	chr12	43922625	43934180	60	61	77	66
517423	chr4	73433084	73442570	ADAMTS3	chr4	73419945	73431892	372	144	161	225.667
517423	chr4	73433084	73442570	ADAMTS3	chr4	73574816	73579890	29	25	17	23.6667
423900	chr21	28335109	28341607	ADAMTS5	chr21	28346455	28347130	318	206	262	262
575102	chr5	64777556	64778174	ADAMTS6	chr5	64105189	64109332	68	82	28	59.3333
575102	chr5	64777556	64778174	ADAMTS6	chr5	64258368	64265008	33	26	33	30.6667
575102	chr5	64777556	64778174	ADAMTS6	chr5	64561521	64571386	26	16	7	16.3333
575102	chr5	64777556	64778174	ADAMTS6	chr5	64778410	64780817	316	278	279	291
140327	chr11	130296757	130307018	ADAMTS8	chr11	130071682	130086508	38	29	33	33.3333
140327	chr11	130296757	130307018	ADAMTS8	chr11	130307035	130316167	201	114	120	145
140327	chr11	130296757	130307018	ADAMTS8	chr11	130725267	130731663	145	42	54	80.3333
455872	chr3	64672693	64676281	ADAMTS9	chr3	64677632	64684682	427	89	327	281
455872	chr3	64672693	64676281	ADAMTS9	chr3	65239080	65244536	7	8	8	7.66667
455872	chr3	64672693	64676281	ADAMTS9	chr3	65326708	65340296	13	9	11	11
455827	chr3	64546185	64548376	ADAMTS9-AS1	chr3	64544110	64552511	474	363	425	420.667
756352	chr9	18473002	18476310	ADAMTSL1	chr9	18260120	18274285	15	9	10	11.3333
756352	chr9	18473002	18476310	ADAMTSL1	chr9	18467358	18479182	337	235	341	304.333
784338	chr9	136395933	136408466	ADAMTSL2	chr9	136391995	136392687	177	97	73	115.667
253717	chr15	84321060	84326442	ADAMTSL3	chr15	84311136	84313845	90	66	71	75.6667
661950	chr7	992498	1000005	ADAP1	chr7	1004237	1006587	347	171	128	215.333
36484	chr1	154596617	154601605	ADAR	chr1	154720776	154735346	127	44	82	84.3333
428918	chr21	46491229	46496124	ADARB1	chr21	46497240	46501432	803	419	398	540
64829	chr10	1779435	1780609	ADARB2	chr10	1783018	1785357	407	277	312	332
64829	chr10	1779435	1780609	ADARB2	chr10	2191929	2199930	11	6	6	7.66667
275174	chr16	75655746	75664032	ADAT1	chr16	75664405	75674700	72	53	54	59.6667
653761	chr6	143766881	143775109	ADAT2	chr6	142478830	142489784	4	3	3	3.33333
653761	chr6	143766881	143775109	ADAT2	chr6	143002606	143013393	10	5	7	7.33333
653761	chr6	143766881	143775109	ADAT2	chr6	143239603	143257060	15	5	6	8.66667
653761	chr6	143766881	143775109	ADAT2	chr6	143377159	143386794	20	7	7	11.3333
653761	chr6	143766881	143775109	ADAT2	chr6	143541674	143552566	14	3	6	7.66667
653761	chr6	143766881	143775109	ADAT2	chr6	143758382	143764172	234	260	124	206
227962	chr14	78254385	78275373	ADCK1	chr14	78282927	78283606	65	43	41	49.6667
702203	chr7	140366555	140392221	ADCK2	chr7	140394467	140394772	92	75	72	79.6667
702203	chr7	140366555	140392221	ADCK2	chr7	140704957	140714817	17	15	4	12
58065	chr1	227085018	227088371	ADCK3	chr1	227081717	227093521	299	159	167	208.333
58065	chr1	227085018	227088371	ADCK3	chr1	227615902	227624488	26	14	17	19
328606	chr19	41215027	41238732	ADCK4	chr19	41199075	41201543	193	110	100	134.333
675016	chr7	45604128	45619671	ADCY1	chr7	45596746	45601938	149	96	59	101.333
40189	chr1	167883044	167896876	ADCY10	chr1	167876182	167880083	593	331	216	380
557337	chr5	7394055	7399507	ADCY2	chr5	7390950	7404684	320	219	341	293.333
339201	chr2	25138835	25146662	ADCY3	chr2	25149728	25156397	715	448	183	448.667
211702	chr14	24800814	24805365	ADCY4	chr14	24387934	24407469	14	4	5	7.66667
211702	chr14	24800814	24805365	ADCY4	chr14	25144442	25155066	8	6	7	7
473578	chr3	123162907	123172340	ADCY5	chr3	123178270	123178839	385	191	190	255.333
156352	chr12	49174578	49186511	ADCY6	chr12	49166920	49168684	154	68	64	95.3333
746873	chr8	132053643	132056079	ADCY8	chr8	132048636	132064632	188	108	212	169.333
746873	chr8	132053643	132056079	ADCY8	chr8	132815091	132825153	22	17	15	18
259473	chr16	4163681	4169290	ADCY9	chr16	4158019	4170554	418	281	256	318.333
297908	chr18	902775	912992	ADCYAP1	chr18	891934	899475	135	147	78	120
670820	chr7	31088446	31093505	ADCYAP1R1	chr7	31077966	31085232	165	101	262	176
496970	chr4	2844877	2846675	ADD1	chr4	1874936	1885680	10	5	4	6.33333
496970	chr4	2844877	2846675	ADD1	chr4	2246332	2260879	15	15	5	11.6667
496970	chr4	2844877	2846675	ADD1	chr4	2839735	2840272	782	480	390	550.667
352942	chr2	70990316	71000235	ADD2	chr2	70986375	70989372	627	370	383	460
95825	chr10	111752628	111756722	ADD3	chr10	111752131	111752335	307	272	114	231
526198	chr4	100200869	100212365	ADH1A	chr4	100213494	100224190	83	273	27	127.667
526206	chr4	100235295	100243840	ADH1B	chr4	100248060	100250858	63	31	64	52.6667
526161	chr4	100076553	100084184	ADH4	chr4	100067059	100072248	285	203	134	207.333
526146	chr4	100009667	100017455	ADH5	chr4	99376235	99392415	10	16	4	10
526146	chr4	100009667	100017455	ADH5	chr4	99591581	99607011	7	9	8	8
526146	chr4	100009667	100017455	ADH5	chr4	99994152	99998910	136	56	55	82.3333
526146	chr4	100009667	100017455	ADH5	chr4	100319687	100333371	10	8	11	9.66667
526179	chr4	100139788	100144021	ADH6	chr4	100131507	100136673	385	264	265	304.667
526238	chr4	100351444	100357284	ADH7	chr4	100360636	100362023	225	108	111	148
412663	chr20	37209070	37215447	ADIG	chr20	37195948	37202566	135	74	98	102.333
493064	chr3	186571165	186574227	ADIPOQ-AS1	chr3	186578497	186590077	194	106	92	130.667
51050	chr1	202926054	202928210	ADIPOR1	chr1	202921995	202923694	576	378	277	410.333
142182	chr12	1796050	1798892	ADIPOR2	chr12	1227464	1243303	18	4	11	11
320405	chr18	77863651	77867865	ADNP2	chr18	77855561	77858112	276	325	114	238.333
82244	chr10	64562869	64568265	ADO	chr10	64569473	64577588	262	145	347	251.333
82244	chr10	64562869	64568265	ADO	chr10	64904644	64909537	52	40	17	36.3333
430980	chr22	24813221	24822908	ADORA2A	chr22	24810680	24813094	291	171	171	211
282480	chr17	15845336	15851234	ADORA2B	chr17	15837979	15843689	264	125	135	174.667
30800	chr1	112101231	112106609	ADORA3	chr1	112099410	112100497	229	171	106	168.667
250787	chr15	73072205	73077870	ADPGK	chr15	73061522	73062106	243	152	159	184.667
250787	chr15	73072205	73077870	ADPGK	chr15	73360276	73368317	60	19	30	36.3333
472458	chr3	119295533	119299881	ADPRH	chr3	118610801	118625650	4	6	3	4.33333
209974	chr13	114106930	114111600	ADPRHL1	chr13	114114054	114117177	263	228	265	252
715040	chr8	26720502	26726075	ADRA1A	chr8	26716889	26732103	319	250	264	277.667
604427	chr5	159341749	159345488	ADRA1B	chr5	158584195	158596908	33	6	29	22.6667
604427	chr5	159341749	159345488	ADRA1B	chr5	159079699	159082748	46	21	41	36
604427	chr5	159341749	159345488	ADRA1B	chr5	159334774	159350903	601	264	453	439.333
404364	chr20	4223812	4231069	ADRA1D	chr20	4239389	4239664	158	100	119	125.667
404364	chr20	4223812	4231069	ADRA1D	chr20	4565899	4575297	40	13	33	28.6667
96169	chr10	112832585	112839323	ADRA2A	chr10	112824472	112830622	244	360	429	344.333
96169	chr10	112832585	112839323	ADRA2A	chr10	113895303	113898530	11	5	9	8.33333
359095	chr2	96780361	96788417	ADRA2B	chr2	96797108	96799843	247	109	155	170.333
601068	chr5	148201249	148211066	ADRB2	chr5	148491915	148494342	72	46	30	49.3333
121719	chr11	67024509	67039529	ADRBK1	chr11	67018839	67019225	150	85	64	99.6667
418861	chr20	60871672	60890793	ADRM1	chr20	60869146	60870544	804	482	649	645
434750	chr22	40737045	40748584	ADSL	chr22	39929702	39944795	20	18	22	20
434750	chr22	40737045	40748584	ADSL	chr22	40435508	40450764	33	23	22	26
434750	chr22	40737045	40748584	ADSL	chr22	40724846	40729999	254	147	163	188
63154	chr1	244611695	244618371	ADSS	chr1	244605464	244608911	156	315	91	187.333
63154	chr1	244611695	244618371	ADSS	chr1	244811162	244824241	24	6	10	13.3333
235521	chr14	105182641	105202200	ADSSL1	chr14	104555095	104555272	18	12	10	13.3333
235521	chr14	105182641	105202200	ADSSL1	chr14	105174366	105178816	200	102	128	143.333
210985	chr14	22065499	22082209	AE000658.2	chr14	22089888	22093754	11	9	8	9.33333
211035	chr14	22246534	22249896	AE000659.2	chr14	22251151	22254720	303	273	341	305.667
211135	chr14	22608940	22611263	AE000660.1	chr14	22602906	22621324	197	201	211	203
211257	chr14	23021261	23030340	AE000662.92	chr14	22858543	22867112	88	24	23	45
211257	chr14	23021261	23030340	AE000662.92	chr14	23014172	23033077	351	211	141	234.333
211257	chr14	23021261	23030340	AE000662.92	chr14	23318455	23335597	57	27	33	39
674709	chr7	44139252	44145677	AEBP1	chr7	44126309	44137193	986	262	367	538.333
255056	chr15	89161102	89174277	AEN	chr15	89152635	89154318	245	136	97	159.333
427982	chr21	41949160	41957019	AF064863.1	chr21	41961604	41972956	12	7	10	9.66667
227345	chr14	75751241	75761416	AF111167.1	chr14	75598587	75607881	80	39	62	60.3333
227345	chr14	75751241	75761416	AF111167.1	chr14	75765010	75769817	142	88	68	99.3333
227853	chr14	77870133	77872885	AF111168.2	chr14	77880010	77882505	107	80	84	90.3333
424597	chr21	30560019	30560474	AF124730.4	chr21	30547782	30566021	354	521	269	381.333
420240	chr21	16332529	16333937	AF127577.10	chr21	15768802	15776265	21	15	12	16
420240	chr21	16332529	16333937	AF127577.10	chr21	16331129	16335543	601	398	233	410.667
420240	chr21	16332529	16333937	AF127577.10	chr21	16842073	16857748	24	8	19	17
420248	chr21	16342253	16344136	AF127577.11	chr21	16337932	16340171	584	401	342	442.333
420220	chr21	16288744	16292273	AF127577.8	chr21	16283250	16285866	75	68	81	74.6667
424564	chr21	30431527	30435396	AF129075.5	chr21	30421736	30426899	418	252	292	320.667
710406	chr8	10963469	10968690	AF131215.2	chr8	10958342	10961683	258	189	189	212
710413	chr8	10981035	10990686	AF131215.3	chr8	9806290	9815432	6	4	2	4
710416	chr8	10993657	10996630	AF131215.4	chr8	10990687	11009229	136	139	107	127.333
710393	chr8	10924507	10927347	AF131215.6	chr8	10923465	10924146	457	254	337	349.333
710502	chr8	11203058	11208972	AF131216.5	chr8	11212437	11214763	169	132	148	149.667
710494	chr8	11180600	11183225	AF131216.6	chr8	11183928	11185480	259	168	129	185.333
710494	chr8	11180600	11183225	AF131216.6	chr8	11813762	11820897	6	3	5	4.66667
741958	chr8	116520070	116523103	AF178030.2	chr8	115600288	115618345	8	5	3	5.33333
741958	chr8	116520070	116523103	AF178030.2	chr8	116524587	116528204	736	417	391	514.667
750394	chr8	145923812	145927598	AF186192.1	chr8	145933151	145933383	232	156	153	180.333
799278	chrX	48935142	48938502	AF196779.12	chrX	48927422	48933705	125	79	61	88.3333
799171	chrX	48364132	48371388	AF196972.9	chrX	47925336	47940306	24	26	15	21.6667
799171	chrX	48364132	48371388	AF196972.9	chrX	48351796	48353959	270	153	165	196
527252	chr4	103485281	103488948	AF213884.1	chr4	103483423	103484966	615	441	481	512.333
527252	chr4	103485281	103488948	AF213884.1	chr4	103929253	103935165	44	25	19	29.3333
747378	chr8	133692199	133696311	AF216667.1	chr8	133689796	133699639	557	427	377	453.667
747378	chr8	133692199	133696311	AF216667.1	chr8	134459790	134471688	10	9	7	8.66667
747439	chr8	133852946	133856865	AF230666.2	chr8	133852716	133858255	429	193	201	274.333
747439	chr8	133852946	133856865	AF230666.2	chr8	134456369	134470485	11	10	11	10.6667
601213	chr5	148647907	148653737	AFAP1L1	chr5	147268671	147280177	10	4	8	7.33333
601213	chr5	148647907	148653737	AFAP1L1	chr5	148118609	148130441	25	18	30	24.3333
601213	chr5	148647907	148653737	AFAP1L1	chr5	148526859	148529079	79	29	50	52.6667
601213	chr5	148647907	148653737	AFAP1L1	chr5	148646092	148661812	477	317	316	370
97174	chr10	116161016	116179427	AFAP1L2	chr10	116154578	116157301	124	99	161	128
522203	chr4	87852276	87859763	AFF1	chr4	87411476	87423506	32	5	10	15.6667
522203	chr4	87852276	87859763	AFF1	chr4	87844987	87848355	679	371	305	451.667
596504	chr5	132297911	132300277	AFF4	chr5	132291028	132296280	379	229	159	255.667
596504	chr5	132297911	132300277	AFF4	chr5	133283103	133301307	5	5	2	4
301394	chr18	12369217	12378670	AFG3L2	chr18	12364635	12367540	791	426	439	552
301394	chr18	12369217	12378670	AFG3L2	chr18	12944268	12946013	10	17	6	11
517715	chr4	74344675	74351527	AFM	chr4	74344174	74344606	73	67	44	61.3333
517700	chr4	74294117	74296951	AFP	chr4	74298197	74300112	387	245	360	330.667
351123	chr2	64750059	64756237	AFTPH	chr2	64356180	64370088	32	13	11	18.6667
351123	chr2	64750059	64756237	AFTPH	chr2	64761935	64767014	285	184	157	208.667
351123	chr2	64750059	64756237	AFTPH	chr2	65773308	65788802	5	6	3	4.66667
551507	chr4	178359092	178367324	AGA	chr4	178367394	178377343	123	76	78	92.3333
401923	chr2	236397749	236406215	AGAP1	chr2	236392297	236407745	241	211	171	207.667
401923	chr2	236397749	236406215	AGAP1	chr2	237083864	237097892	14	4	8	8.66667
158477	chr12	58134516	58138608	AGAP2	chr12	58125392	58141111	523	275	144	314
705199	chr7	150782321	150785672	AGAP3	chr7	149408500	149410344	8	5	8	7
705199	chr7	150782321	150785672	AGAP3	chr7	150081560	150093126	14	5	4	7.66667
705199	chr7	150782321	150785672	AGAP3	chr7	151207022	151213283	11	8	11	10
705199	chr7	150782321	150785672	AGAP3	chr7	151320915	151339948	15	5	7	9
254315	chr15	86680950	86687149	AGBL1	chr15	86676736	86680156	187	157	160	168
700585	chr7	134670203	134673323	AGBL3	chr7	134133310	134152469	16	10	8	11.3333
700585	chr7	134670203	134673323	AGBL3	chr7	134678806	134682138	263	201	111	191.667
700585	chr7	134670203	134673323	AGBL3	chr7	134831134	134840738	101	53	32	62
700585	chr7	134670203	134673323	AGBL3	chr7	135631796	135645029	10	4	3	5.66667
11496	chr1	50485989	50489923	AGBL4	chr1	50484077	50485675	209	240	145	198
339716	chr2	27263510	27279139	AGBL5	chr2	27279295	27281973	397	260	235	297.333
619834	chr6	32151507	32153168	AGER	chr6	32092230	32094111	68	37	28	44.3333
399753	chr2	228332065	228338268	AGFG1	chr2	227694652	227703467	19	12	5	12
399753	chr2	228332065	228338268	AGFG1	chr2	228341271	228343352	502	318	331	383.667
690243	chr7	100135589	100138654	AGFG2	chr7	100144501	100146858	28	25	13	22
578626	chr5	76323564	76325667	AGGF1	chr5	76321497	76321655	177	158	169	168
702456	chr7	141249571	141251912	AGK	chr7	140501625	140516236	10	10	9	9.66667
702456	chr7	141249571	141251912	AGK	chr7	140712711	140720686	43	40	26	36.3333
702456	chr7	141249571	141251912	AGK	chr7	141239849	141244311	273	291	207	257
27202	chr1	100313162	100317801	AGL	chr1	100308094	100309536	519	300	172	330.333
27202	chr1	100313162	100317801	AGL	chr1	101336503	101345905	15	15	7	12.3333
3352	chr1	15908460	15915579	AGMAT	chr1	15904571	15905902	19	20	9	16
665921	chr7	15600655	15601943	AGMO	chr7	15593945	15609757	332	249	379	320
619832	chr6	32144835	32148799	AGPAT1	chr6	32092230	32094111	223	109	69	133.667
659150	chr6	161694042	161695668	AGPAT4	chr6	161691276	161703678	600	493	122	405
719375	chr8	41419580	41434997	AGPAT6	chr8	41686717	41703728	47	11	19	25.6667
521076	chr4	84447588	84463441	AGPAT9	chr4	84548487	84560762	17	16	23	18.6667
384020	chr2	178255995	178260243	AGPS	chr2	178260837	178262804	178	134	65	125.667
666324	chr7	16872902	16878949	AGR2	chr7	16881998	16887779	390	211	336	312.333
666340	chr7	16921524	16923584	AGR3	chr7	16910878	16921478	473	403	126	334
273135	chr16	67515357	67517762	AGRP	chr16	67518133	67538081	133	74	77	94.6667
59037	chr1	230849236	230855684	AGT	chr1	230859983	230860778	263	106	133	167.333
771392	chr9	88355594	88357369	AGTPBP1	chr9	88341231	88354651	177	199	207	194.333
771392	chr9	88355594	88357369	AGTPBP1	chr9	88557188	88566359	34	26	9	23
771392	chr9	88355594	88357369	AGTPBP1	chr9	88903844	88910565	8	4	9	7
481097	chr3	148413140	148417483	AGTR1	chr3	148417829	148425312	161	99	184	148
818498	chrX	115292344	115307003	AGTR2	chrX	115314971	115322120	54	32	49	45
2331	chr1	11793489	11797297	AGTRAP	chr1	11338705	11343920	19	12	6	12.3333
2331	chr1	11793489	11797297	AGTRAP	chr1	11799679	11819384	400	227	84	237
565790	chr5	35043586	35051674	AGXT2	chr5	34489254	34503196	7	3	3	4.33333
565790	chr5	35043586	35051674	AGXT2	chr5	35042324	35057237	132	68	141	113.667
529297	chr4	109679489	109686848	AGXT2L1	chr4	109673187	109692651	256	211	334	267
529297	chr4	109679489	109686848	AGXT2L1	chr4	110306791	110309358	24	8	18	16.6667
609754	chr5	177653649	177662160	AGXT2L2	chr5	177648064	177651879	153	86	91	110
63845	chr1	247094208	247098686	AHCTF1	chr1	246272762	246275955	4	5	4	4.33333
63845	chr1	247094208	247098686	AHCTF1	chr1	247089444	247089681	573	387	220	393.333
30311	chr1	110522706	110534653	AHCYL1	chr1	110184248	110187339	31	17	17	21.6667
30311	chr1	110522706	110534653	AHCYL1	chr1	110320344	110328475	77	29	37	47.6667
30311	chr1	110522706	110534653	AHCYL1	chr1	110543234	110550201	172	153	177	167.333
6008	chr1	27928426	27931673	AHDC1	chr1	27724407	27740240	47	20	16	27.6667
6008	chr1	27928426	27931673	AHDC1	chr1	27921595	27927978	69	73	33	58.3333
651295	chr6	135826331	135834228	AHI1	chr6	135818167	135824695	13	8	5	8.66667
120801	chr11	62320337	62328425	AHNAK	chr11	61184684	61194194	7	6	6	6.33333
666461	chr7	17333329	17339625	AHR	chr7	16462079	16468793	12	8	3	7.66667
666461	chr7	17333329	17339625	AHR	chr7	17327299	17332873	273	160	165	199.333
555463	chr5	301198	312667	AHRR	chr5	420195	434921	113	37	55	68.3333
555463	chr5	301198	312667	AHRR	chr5	902176	902402	21	9	22	17.3333
227866	chr14	77922017	77926065	AHSA1	chr14	77926557	77930417	283	185	252	240
493004	chr3	186329664	186335561	AHSG	chr3	186336740	186337679	298	224	171	231
266112	chr16	31538229	31539544	AHSP	chr16	31527041	31540708	195	298	125	206
266112	chr16	31538229	31539544	AHSP	chr16	31865519	31879802	20	17	9	15.3333
783783	chr9	133970444	133974355	AIF1L	chr9	133958621	133959763	144	64	59	89
822704	chrX	129294928	129303712	AIFM1	chrX	129292772	129311190	321	187	459	322.333
430330	chr22	21317189	21334132	AIFM3	chr22	21337491	21340295	178	100	87	121.667
653627	chr6	143380383	143385999	AIG1	chr6	143386795	143390810	278	186	245	236.333
5736	chr1	26677864	26685407	AIM1L	chr1	26670264	26676096	572	333	431	445.333
37608	chr1	159111626	159124664	AIM2	chr1	159099800	159104679	81	37	46	54.6667
528487	chr4	107234896	107240195	AIMP1	chr4	106377359	106390710	11	9	5	8.33333
528487	chr4	107234896	107240195	AIMP1	chr4	106630953	106635067	31	12	16	19.6667
528487	chr4	107234896	107240195	AIMP1	chr4	107230901	107232786	430	299	318	349
[truncated: 26,614 more rows]
