# Supplementary material for: ChiCMaxima: a robust and simple pipeline for detection and visualization of chromatin looping in Capture Hi-C
Source: Genome Biol. 2019 May 22;20:102. doi: 10.1186/s13059-019-1706-3 (PMC6532271; doi:10.1186/s13059-019-1706-3)
Supplement: Supplementary file 8 — Table S7. List of human M1 macrophage interactions called by ChiCMaxima from three CHi-C replicates. (XLSX 2503 kb) [file 13059_2019_1706_MOESM8_ESM.xlsx]

## Sheet: S7 - M1 CHi-C
Table S7. List of human M1 macrophage interactions called by ChiCMaxima from three CHi-C replicates
ID_Bait	chr_Bait	start_Bait	end_Bait	Bait_name	chr_OE	start_OE	end_OE	N.1	N.2	N.3	N.mean
78445	chr10	52641291	52645702	A1CF	chr10	52396403	52397599	11	8	8	9
206254	chr13	101241374	101243366	A2LD1	chr13	100543872	100563259	6	15	14	11.6667
206254	chr13	101241374	101243366	A2LD1	chr13	100886078	100903121	15	8	9	10.6667
206254	chr13	101241374	101243366	A2LD1	chr13	101250771	101252016	332	259	203	264.667
206254	chr13	101241374	101243366	A2LD1	chr13	101776116	101780725	11	14	8	11
144108	chr12	9268746	9269882	A2M	chr12	9272082	9273211	443	274	237	318
144042	chr12	8983123	8986825	A2ML1-AS1	chr12	8988947	9002538	190	244	280	238
144039	chr12	8972319	8975489	A2ML1-AS2	chr12	8273224	8293010	3	5	6	4.66667
144039	chr12	8972319	8975489	A2ML1-AS2	chr12	8988947	8993698	91	93	73	85.6667
435232	chr22	43104727	43123445	A4GALT	chr22	43138227	43140604	34	36	21	30.3333
157379	chr12	53718188	53721565	AAAS	chr12	53732141	53734417	460	542	336	446
178672	chr12	125541824	125553041	AACS	chr12	125535648	125540652	361	266	183	270
482073	chr3	151521668	151531842	AADAC	chr3	151174228	151184900	17	16	12	15
482073	chr3	151521668	151531842	AADAC	chr3	151516955	151534849	168	99	135	134
2535	chr1	12773296	12776419	AADACL3	chr1	12763156	12770050	57	74	56	62.3333
549068	chr4	171010864	171015572	AADAT	chr4	170725068	170739159	31	26	27	28
549068	chr4	171010864	171015572	AADAT	chr4	171005946	171009144	318	288	282	296
273743	chr16	70313654	70325070	AARS	chr16	70331538	70332963	922	662	488	690.667
287787	chr17	41128312	41133939	AARSD1	chr17	41121005	41127488	165	144	119	142.667
512394	chr4	57252367	57255776	AASDH	chr4	57248161	57250022	1026	550	535	703.667
512394	chr4	57252367	57255776	AASDH	chr4	57690780	57703045	53	48	21	40.6667
133220	chr11	105941458	105949844	AASDHPPT	chr11	106908333	106913750	9	2	3	4.66667
696784	chr7	121780190	121788483	AASS	chr7	121794760	121795919	204	132	116	150.667
297335	chr17	79137855	79146085	AATK-AS1	chr17	79146249	79149643	55	63	69	62.3333
235738	chr14	106650092	106664716	AB019440.1	chr14	106665101	106667311	168	184	117	156.333
260602	chr16	8757589	8780880	ABAT	chr16	8782154	8782995	161	198	103	154
776826	chr9	107684509	107694252	ABCA1	chr9	107680051	107681408	461	277	238	325.333
776826	chr9	107684509	107694252	ABCA1	chr9	108175593	108182836	20	20	17	19
294576	chr17	67240575	67245534	ABCA10	chr17	66532321	66540116	10	16	7	11
294576	chr17	67240575	67245534	ABCA10	chr17	66768261	66768419	106	64	74	81.3333
294576	chr17	67240575	67245534	ABCA10	chr17	67237706	67249550	210	98	121	143
396091	chr2	215996772	216005331	ABCA12	chr2	216010023	216015214	167	152	74	131
675711	chr7	48205362	48213863	ABCA13	chr7	47981844	47998206	14	22	17	17.6667
675711	chr7	48205362	48213863	ABCA13	chr7	48202364	48202650	126	102	104	110.667
25311	chr1	94584058	94587741	ABCA4	chr1	94576598	94581355	158	506	121	261.667
25311	chr1	94584058	94587741	ABCA4	chr1	95286960	95303174	6	8	5	6.33333
294607	chr17	67321593	67325780	ABCA5	chr17	66768261	66772891	19	11	9	13
294607	chr17	67321593	67325780	ABCA5	chr17	67319260	67320760	279	150	184	204.333
294547	chr17	67137035	67148210	ABCA6	chr17	66768804	66775416	30	25	20	25
294547	chr17	67137035	67148210	ABCA6	chr17	67149791	67152477	377	291	380	349.333
294502	chr17	66946677	66957316	ABCA8	chr17	66940902	66945724	109	28	31	56
294502	chr17	66946677	66957316	ABCA8	chr17	67234445	67248493	29	5	10	14.6667
294525	chr17	67053971	67060673	ABCA9	chr17	66768804	66775416	80	48	37	55
294512	chr17	66999518	67013082	ABCA9-AS1	chr17	67015388	67018718	170	78	134	127.333
58705	chr1	229692817	229697283	ABCB10	chr1	229407838	229424901	32	17	17	22
58705	chr1	229692817	229697283	ABCB10	chr1	230424919	230436819	11	24	16	17
381459	chr2	169881986	169889602	ABCB11	chr2	169879977	169880779	804	466	424	564.667
686356	chr7	87109481	87112603	ABCB4	chr7	87507648	87521163	12	9	13	11.3333
667588	chr7	20639530	20655362	ABCB5	chr7	19782787	19791770	38	19	16	24.3333
667588	chr7	20639530	20655362	ABCB5	chr7	20361501	20366802	11	8	14	11
667588	chr7	20639530	20655362	ABCB5	chr7	20655503	20661691	41	38	37	38.6667
805896	chrX	74371809	74378654	ABCB7	chrX	74495012	74506808	32	25	22	26.3333
805896	chrX	74371809	74378654	ABCB7	chrX	74959072	74973623	5	5	3	4.33333
262399	chr16	16029025	16052541	ABCC1	chr16	16071404	16076224	57	95	43	65
267603	chr16	48189744	48200897	ABCC12	chr16	47166493	47184281	10	20	8	12.6667
267603	chr16	48189744	48200897	ABCC12	chr16	48189342	48189720	128	155	127	136.667
267603	chr16	48189744	48200897	ABCC12	chr16	48664464	48670834	10	6	7	7.66667
92879	chr10	101526826	101552246	ABCC2	chr10	101556338	101557602	254	144	98	165.333
92879	chr10	101526826	101552246	ABCC2	chr10	101805579	101818862	12	12	11	11.6667
204753	chr13	95951787	95955271	ABCC4	chr13	95959827	95960170	246	263	183	230.667
492332	chr3	183733408	183737933	ABCC5	chr3	183729356	183732342	775	352	391	506
492325	chr3	183724060	183724316	ABCC5-AS1	chr3	183235428	183254979	18	14	6	12.6667
492325	chr3	183724060	183724316	ABCC5-AS1	chr3	183729356	183731411	696	445	312	484.333
492325	chr3	183724060	183724316	ABCC5-AS1	chr3	184235217	184254315	24	8	6	12.6667
107204	chr11	17490949	17499574	ABCC8	chr11	17261472	17264336	30	31	16	25.6667
107204	chr11	17490949	17499574	ABCC8	chr11	17982185	17997706	11	17	7	11.6667
107204	chr11	17490949	17499574	ABCC8	chr11	18774119	18782589	3	7	2	4
148149	chr12	22090571	22104163	ABCC9	chr12	22086938	22089783	62	30	47	46.3333
153554	chr12	40010935	40014886	ABCD2	chr12	40005682	40016488	232	140	177	183
25405	chr1	94876094	94886259	ABCD3	chr1	94872649	94875510	154	99	124	125.667
227087	chr14	74768726	74798920	ABCD4	chr14	74763705	74765410	191	132	40	121
541105	chr4	146015816	146020399	ABCE1	chr4	145092725	145107819	31	23	15	23
541105	chr4	146015816	146020399	ABCE1	chr4	145267310	145268297	23	14	9	15.3333
541105	chr4	146015816	146020399	ABCE1	chr4	146009386	146024668	417	227	239	294.333
541105	chr4	146015816	146020399	ABCE1	chr4	146540780	146548244	43	14	25	27.3333
541105	chr4	146015816	146020399	ABCE1	chr4	147203667	147210662	10	5	4	6.33333
619553	chr6	30534753	30541639	ABCF1	chr6	30529805	30532963	17	11	10	12.6667
705223	chr7	150923041	150936379	ABCF2	chr7	150905888	150921408	174	203	104	160.333
428379	chr21	43607927	43629023	ABCG1	chr21	43599860	43601643	200	127	115	147.333
428379	chr21	43607927	43629023	ABCG1	chr21	43865187	43875346	13	19	15	15.6667
522588	chr4	89150699	89153356	ABCG2	chr4	89421871	89429790	37	15	20	24
137048	chr11	119008735	119023006	ABCG4	chr11	119004390	119005164	353	424	223	333.333
344667	chr2	44064966	44069810	ABCG5	chr2	44057255	44070326	373	687	436	498.667
344667	chr2	44064966	44069810	ABCG5	chr2	44522734	44533490	9	9	10	9.33333
339740	chr2	27346267	27348910	ABHD1	chr2	27344914	27355885	195	258	155	202.667
470002	chr3	111695488	111699177	ABHD10	chr3	110787300	110799122	9	3	6	6
470002	chr3	111695488	111699177	ABHD10	chr3	111434114	111439422	112	77	66	85
470002	chr3	111695488	111699177	ABHD10	chr3	111693619	111704349	691	366	378	478.333
470002	chr3	111695488	111699177	ABHD10	chr3	112259782	112264401	5	7	11	7.66667
410775	chr20	25366671	25376452	ABHD12	chr20	25350768	25359281	58	47	35	46.6667
220028	chr14	51338682	51347442	ABHD12B	chr14	51359143	51364733	80	72	56	69.3333
220028	chr14	51338682	51347442	ABHD12B	chr14	51677389	51695461	10	8	5	7.66667
452122	chr3	52002602	52010820	ABHD14A	chr3	51436309	51439407	7	8	7	7.33333
284587	chr17	27890004	27894879	ABHD15	chr17	27897714	27902713	274	315	195	261.333
619765	chr6	31661602	31672195	ABHD16A	chr6	31677680	31680465	74	84	67	75
255166	chr15	89621638	89633335	ABHD2	chr15	89615148	89616023	515	332	171	339.333
302448	chr18	19275306	19287427	ABHD3	chr18	19256864	19261000	12	5	16	11
211271	chr14	23062238	23067559	ABHD4	chr14	23057021	23076302	183	102	123	136
450170	chr3	43724212	43735506	ABHD5	chr3	43737595	43739975	265	111	136	170.667
450170	chr3	43724212	43735506	ABHD5	chr3	44241926	44254967	5	11	4	6.66667
323017	chr19	17400417	17414916	ABHD8	chr19	17348068	17366967	31	32	15	26
72175	chr10	27148168	27151789	ABI1	chr10	27133500	27138628	122	61	84	89
289143	chr17	47286829	47292714	ABI3	chr17	47277724	47278133	240	276	251	255.667
466450	chr3	100709288	100714790	ABI3BP	chr3	100707589	100716522	267	196	101	188
466450	chr3	100709288	100714790	ABI3BP	chr3	101095687	101103684	8	9	5	7.33333
783706	chr9	133576743	133589751	ABL1	chr9	133571873	133574272	655	385	459	499.667
783706	chr9	133576743	133589751	ABL1	chr9	133734712	133740312	171	158	72	133.667
43789	chr1	179196747	179205715	ABL2	chr1	178743782	178754849	5	3	3	3.66667
43789	chr1	179196747	179205715	ABL2	chr1	179212634	179216318	91	55	57	67.6667
97255	chr10	116442134	116447410	ABLIM1	chr10	116447894	116448243	451	261	262	324.667
601171	chr5	148520758	148526858	ABLIM3	chr5	148514266	148516319	298	190	149	212.333
705148	chr7	150512976	150523919	ABP1	chr7	150529132	150535628	199	171	190	186.667
618422	chr6	26593067	26601342	ABT1	chr6	26584297	26592477	405	225	317	315.667
618422	chr6	26593067	26601342	ABT1	chr6	27048455	27064192	21	23	20	21.3333
618422	chr6	26593067	26601342	ABT1	chr6	27450468	27455330	10	5	7	7.33333
474738	chr3	127388664	127399743	ABTB1	chr3	127377634	127381578	215	280	186	227
474738	chr3	127388664	127399743	ABTB1	chr3	127687063	127688403	40	54	37	43.6667
112583	chr11	34376256	34385647	ABTB2	chr11	34187718	34202435	177	150	74	133.667
112583	chr11	34376256	34385647	ABTB2	chr11	34370219	34373503	378	322	256	318.667
112583	chr11	34376256	34385647	ABTB2	chr11	34484738	34487488	190	136	111	145.667
280782	chr17	9972695	9976981	AC000003.1	chr17	8848406	8858662	6	4	3	4.33333
280782	chr17	9972695	9976981	AC000003.1	chr17	9978733	9989981	551	361	341	417.667
280782	chr17	9972695	9976981	AC000003.1	chr17	10524251	10542423	14	5	3	7.33333
430734	chr22	23476911	23481106	AC000029.1	chr22	23300832	23302691	12	12	9	11
432240	chr22	29869289	29877404	AC000035.3	chr22	29867494	29868297	218	227	135	193.333
698469	chr7	126848723	126855584	AC000099.1	chr7	126843445	126846332	307	270	186	254.333
695317	chr7	117203158	117205915	AC000111.3	chr7	117199881	117211196	353	239	149	247
695317	chr7	117203158	117205915	AC000111.3	chr7	117689431	117708983	13	9	8	10
695349	chr7	117286445	117296105	AC000111.6	chr7	117280198	117283514	90	77	86	84.3333
698507	chr7	126990132	126991379	AC000123.4	chr7	126423586	126429475	12	4	3	6.33333
698507	chr7	126990132	126991379	AC000123.4	chr7	126995294	127006044	366	378	405	383
698178	chr7	126018517	126019314	AC000370.2	chr7	126019790	126027689	214	184	198	198.667
698178	chr7	126018517	126019314	AC000370.2	chr7	126477234	126485622	8	8	9	8.33333
687229	chr7	89899258	89899670	AC002064.4	chr7	89894613	89906202	387	205	514	368.667
687229	chr7	89899258	89899670	AC002064.4	chr7	90052561	90061948	28	51	21	33.3333
177557	chr12	120017868	120022164	AC002070.1	chr12	120023095	120030686	259	142	197	199.333
688395	chr7	93518811	93526004	AC002076.10	chr7	93516907	93528212	212	210	178	200
688395	chr7	93518811	93526004	AC002076.10	chr7	93714974	93723018	44	25	26	31.6667
688395	chr7	93518811	93526004	AC002076.10	chr7	94030562	94036742	31	29	19	26.3333
265933	chr16	30583431	30599062	AC002310.7	chr16	30603111	30606537	113	103	97	104.333
265135	chr16	26655086	26667187	AC002331.1	chr16	26670393	26670939	138	102	94	111.333
828153	chrX	147579628	147584803	AC002368.4	chrX	147217061	147225959	16	7	8	10.3333
828153	chrX	147579628	147584803	AC002368.4	chrX	147586040	147587569	170	110	111	130.333
688808	chr7	94843257	94846649	AC002429.5	chr7	94832589	94850619	73	92	146	103.667
687340	chr7	90224880	90229044	AC002456.2	chr7	90222605	90232276	317	284	306	302.333
695228	chr7	116938738	116942637	AC002465.2	chr7	116945418	116947596	302	213	232	249
327641	chr19	35903842	35921173	AC002511.2	chr19	35922293	35923941	402	392	281	358.333
327644	chr19	35923942	35924938	AC002511.3	chr19	35921174	35930505	762	323	532	539
294839	chr17	68117083	68127423	AC002539.1	chr17	67573771	67580530	29	22	6	19
294839	chr17	68117083	68127423	AC002539.1	chr17	67860971	67878515	11	9	13	11
294839	chr17	68117083	68127423	AC002539.1	chr17	68127734	68128814	167	108	108	127.667
282513	chr17	15942879	15950350	AC002553.1	chr17	15941023	15941565	593	496	486	525
175411	chr12	111505356	111513903	AC002978.1	chr12	111499160	111501966	523	436	287	415.333
175411	chr12	111505356	111513903	AC002978.1	chr12	111708404	111723834	35	36	24	31.6667
175469	chr12	111723835	111753943	AC002979.1	chr12	111460568	111463632	61	79	32	57.3333
175469	chr12	111723835	111753943	AC002979.1	chr12	111722246	111722424	337	397	275	336.333
788191	chrX	12164417	12166833	AC002981.1	chrX	12163709	12171032	23	16	20	19.6667
693438	chr7	111446838	111456213	AC003077.1	chr7	110663287	110675201	3	7	4	4.66667
693438	chr7	111446838	111456213	AC003077.1	chr7	111456846	111457546	398	200	220	272.667
693438	chr7	111446838	111456213	AC003077.1	chr7	112060375	112066450	23	19	21	21
288017	chr17	42313834	42330958	AC003102.1	chr17	42349489	42351537	43	61	32	45.3333
789043	chrX	14781673	14783307	AC003658.1	chrX	14784638	14786672	136	113	78	109
288831	chr17	46017787	46020845	AC003665.1	chr17	46010762	46013246	140	148	105	131
787561	chrX	10183841	10190318	AC003666.1	chrX	10181451	10183187	377	165	144	228.667
787561	chrX	10183841	10190318	AC003666.1	chrX	10572591	10592412	15	9	24	16
787561	chrX	10183841	10190318	AC003666.1	chrX	11135047	11148191	9	7	5	7
331781	chr19	58070618	58071857	AC003682.1	chr19	57089261	57090500	5	10	4	6.33333
331781	chr19	58070618	58071857	AC003682.1	chr19	58077186	58081824	403	453	306	387.333
287465	chr17	39556895	39559653	AC003958.2	chr17	39058705	39069047	36	17	8	20.3333
287465	chr17	39556895	39559653	AC003958.2	chr17	39561754	39566988	327	180	175	227.333
698064	chr7	125677124	125681676	AC003968.1	chr7	126474836	126485622	7	3	9	6.33333
667078	chr7	19149889	19152619	AC003986.6	chr7	18391696	18400633	12	6	17	11.6667
667078	chr7	19149889	19152619	AC003986.6	chr7	18726569	18732085	35	37	41	37.6667
667078	chr7	19149889	19152619	AC003986.6	chr7	18903664	18917826	26	14	16	18.6667
667078	chr7	19149889	19152619	AC003986.6	chr7	19139139	19154063	738	460	175	457.667
667078	chr7	19149889	19152619	AC003986.6	chr7	19455458	19463643	31	20	9	20
693519	chr7	111705301	111713189	AC004001.1	chr7	111688218	111700208	77	67	56	66.6667
693519	chr7	111705301	111713189	AC004001.1	chr7	111838271	111841521	19	13	11	14.3333
693519	chr7	111705301	111713189	AC004001.1	chr7	112047142	112054041	18	11	10	13
668903	chr7	24940241	24944765	AC004016.1	chr7	24946896	24950375	256	235	229	240
596408	chr5	131995259	132002938	AC004041.2	chr5	132010405	132013729	50	97	60	69
523546	chr4	92022003	92034865	AC004054.1	chr4	92035384	92043277	81	55	63	66.3333
528211	chr4	106470817	106473904	AC004066.3	chr4	106464467	106481293	313	251	276	280
528211	chr4	106470817	106473904	AC004066.3	chr4	107115594	107127560	7	9	7	7.66667
528089	chr4	106098019	106101391	AC004069.3	chr4	106106436	106107953	224	123	129	158.667
528089	chr4	106098019	106101391	AC004069.3	chr4	106377359	106390223	34	22	18	24.6667
528089	chr4	106098019	106101391	AC004069.3	chr4	106626091	106632029	10	11	3	8
669601	chr7	27143269	27156411	AC004080.12	chr7	25918726	25936200	5	12	6	7.66667
669601	chr7	27143269	27156411	AC004080.12	chr7	26897455	26906445	29	56	17	34
669601	chr7	27143269	27156411	AC004080.12	chr7	27162021	27165486	237	265	60	187.333
664555	chr7	11446419	11448376	AC004160.4	chr7	11451669	11454857	207	212	238	219
664555	chr7	11446419	11448376	AC004160.4	chr7	12371872	12372127	13	25	17	18.3333
285994	chr17	33327263	33339463	AC004223.1	chr17	32747860	32763186	7	5	4	5.33333
285994	chr17	33327263	33339463	AC004223.1	chr17	33340076	33346351	97	78	41	72
287335	chr17	39072966	39081007	AC004231.2	chr17	39085476	39088471	401	220	219	280
287335	chr17	39072966	39081007	AC004231.2	chr17	39475430	39478883	62	55	41	52.6667
596414	chr5	132021077	132026796	AC004237.1	chr5	132010405	132020752	261	285	165	237
695362	chr7	117326533	117332208	AC004240.2	chr7	117094390	117100242	36	42	10	29.3333
695362	chr7	117326533	117332208	AC004240.2	chr7	117336768	117337956	379	255	201	278.333
263590	chr16	20809499	20832372	AC004381.6	chr16	20834034	20838377	195	129	130	151.333
263590	chr16	20809499	20832372	AC004381.6	chr16	21092789	21098076	55	29	25	36.3333
689210	chr7	96097482	96097899	AC004458.1	chr7	96092458	96105818	306	274	215	265
689210	chr7	96097482	96097899	AC004458.1	chr7	96632605	96649925	25	22	17	21.3333
429936	chr22	19098663	19119852	AC004471.9	chr22	19613902	19624181	6	10	4	6.66667
668717	chr7	24292338	24302526	AC004485.3	chr7	24291367	24291641	41	13	20	24.6667
691985	chr7	106932849	106935805	AC004492.1	chr7	106926342	106943819	99	60	59	72.6667
669365	chr7	26414940	26426318	AC004540.4	chr7	26428726	26435210	168	93	42	101
669365	chr7	26414940	26426318	AC004540.4	chr7	26530298	26545001	60	27	42	43
669365	chr7	26414940	26426318	AC004540.4	chr7	26690389	26695957	30	21	18	23
669365	chr7	26414940	26426318	AC004540.4	chr7	27203006	27216168	20	24	30	24.6667
670274	chr7	29244468	29248959	AC004593.3	chr7	28967121	28974111	34	27	15	25.3333
670274	chr7	29244468	29248959	AC004593.3	chr7	29251944	29267594	204	179	189	190.667
791573	chrX	23138197	23142068	AC004673.1	chrX	23130919	23149885	86	57	78	73.6667
791573	chrX	23138197	23142068	AC004673.1	chrX	23455047	23471704	5	6	5	5.33333
670744	chr7	30839356	30845759	AC004691.5	chr7	30836356	30839327	241	293	253	262.333
670744	chr7	30839356	30845759	AC004691.5	chr7	31156368	31160121	36	40	28	34.6667
670744	chr7	30839356	30845759	AC004691.5	chr7	31667382	31676001	8	9	6	7.66667
674504	chr7	43285149	43293141	AC004692.4	chr7	43281056	43282592	525	536	377	479.333
674504	chr7	43285149	43293141	AC004692.4	chr7	43729445	43740525	7	16	20	14.3333
667002	chr7	18936264	18939440	AC004744.3	chr7	18925423	18945019	106	179	206	163.667
667002	chr7	18936264	18939440	AC004744.3	chr7	19702071	19710043	9	6	9	8
689476	chr7	96919479	96921456	AC004745.1	chr7	96914197	96917744	241	292	272	268.333
322833	chr19	16122752	16134790	AC004790.1	chr19	16115279	16121309	49	46	50	48.3333
673397	chr7	39649880	39651654	AC004837.4	chr7	39641002	39655868	519	249	84	284
673397	chr7	39649880	39651654	AC004837.4	chr7	39773241	39781693	25	16	20	20.3333
673416	chr7	39742394	39746096	AC004837.5	chr7	39737429	39753047	23	10	16	16.3333
696566	chr7	121209377	121214902	AC004875.1	chr7	121220193	121221430	92	60	30	60.6667
689902	chr7	98610216	98611812	AC004893.11	chr7	98614331	98615491	634	519	482	545
689902	chr7	98610216	98611812	AC004893.11	chr7	98907147	98916927	49	103	48	66.6667
662253	chr7	2981215	2986553	AC004906.3	chr7	2975524	2987443	463	271	323	352.333
662253	chr7	2981215	2986553	AC004906.3	chr7	3950203	3953635	6	5	6	5.66667
704797	chr7	149095265	149099206	AC004941.3	chr7	149089049	149092902	587	255	321	387.667
687191	chr7	89797750	89805367	AC004969.1	chr7	89806288	89807456	60	49	51	53.3333
673664	chr7	40585156	40594948	AC004988.1	chr7	41032860	41049924	4	4	3	3.66667
684306	chr7	80802658	80808518	AC005008.2	chr7	80791837	80809939	197	117	149	154.333
686128	chr7	86404114	86410019	AC005009.1	chr7	86400291	86400970	216	166	193	191.667
686128	chr7	86404114	86410019	AC005009.1	chr7	87048371	87058769	5	3	3	3.66667
669962	chr7	28214270	28220875	AC005017.1	chr7	28222137	28232815	1272	725	243	746.667
674039	chr7	41727444	41736387	AC005027.4	chr7	40366047	40377606	16	31	24	23.6667
674039	chr7	41727444	41736387	AC005027.4	chr7	40644347	40655381	28	22	14	21.3333
674039	chr7	41727444	41736387	AC005027.4	chr7	41504248	41509042	40	35	31	35.3333
674039	chr7	41727444	41736387	AC005027.4	chr7	41722239	41726916	278	115	118	170.333
360641	chr2	102507522	102509732	AC005035.1	chr2	102513197	102515962	901	594	480	658.333
360641	chr2	102507522	102509732	AC005035.1	chr2	102849401	102856742	54	38	32	41.3333
360641	chr2	102507522	102509732	AC005035.1	chr2	103051832	103068768	27	22	11	20
391582	chr2	201697328	201710181	AC005037.1	chr2	201710315	201710599	250	211	196	219
391613	chr2	201822381	201832549	AC005037.3	chr2	201818539	201819235	530	183	196	303
353933	chr2	74724092	74730955	AC005041.17	chr2	74715609	74720494	149	212	118	159.667
378112	chr2	159589994	159594240	AC005042.4	chr2	158892593	158903307	25	29	18	24
378112	chr2	159589994	159594240	AC005042.4	chr2	159028220	159036142	48	17	12	25.6667
378112	chr2	159589994	159594240	AC005042.4	chr2	159318918	159333696	36	14	13	21
378112	chr2	159589994	159594240	AC005042.4	chr2	159585537	159588987	380	310	193	294.333
692212	chr7	107675249	107677856	AC005048.1	chr7	107113544	107119402	8	10	3	7
692212	chr7	107675249	107677856	AC005048.1	chr7	107678997	107682243	378	224	265	289
690221	chr7	99945535	99957189	AC005071.2	chr7	99738167	99740023	19	22	16	19
690221	chr7	99945535	99957189	AC005071.2	chr7	99958147	99959712	289	253	257	266.333
690229	chr7	99995835	100003646	AC005071.3	chr7	100009695	100011445	137	112	86	111.667
668396	chr7	23205292	23213193	AC005082.1	chr7	23202777	23203093	127	79	129	111.667
670673	chr7	30621402	30628695	AC005154.5	chr7	30619961	30632311	76	40	87	67.6667
684686	chr7	81916023	81922657	AC005159.1	chr7	81909937	81927693	178	94	55	109
670204	chr7	29039930	29041158	AC005162.3	chr7	29037628	29044117	279	108	186	191
670230	chr7	29118306	29127727	AC005162.4	chr7	28990642	29006976	38	55	44	45.6667
670230	chr7	29118306	29127727	AC005162.4	chr7	29112907	29131438	234	237	167	212.667
670196	chr7	29021999	29027595	AC005162.5	chr7	29016830	29033111	174	112	111	132.333
670196	chr7	29021999	29027595	AC005162.5	chr7	29420272	29437100	13	10	8	10.3333
670196	chr7	29021999	29027595	AC005162.5	chr7	29605188	29614812	9	7	7	7.66667
529821	chr4	111219390	111231594	AC005187.1	chr4	110942110	110952434	25	25	10	20
529821	chr4	111219390	111231594	AC005187.1	chr4	111210998	111215227	252	147	107	168.667
529821	chr4	111219390	111231594	AC005187.1	chr4	111422446	111432075	38	27	30	31.6667
599058	chr5	141906466	141919576	AC005215.1	chr5	141540319	141544858	37	33	18	29.3333
599058	chr5	141906466	141919576	AC005215.1	chr5	141694870	141711495	29	26	15	23.3333
599058	chr5	141906466	141919576	AC005215.1	chr5	141891316	141905047	267	217	119	201
416678	chr20	52556648	52560771	AC005220.3	chr20	51773584	51781291	17	20	8	15
416678	chr20	52556648	52560771	AC005220.3	chr20	52552339	52564603	671	398	355	474.667
416678	chr20	52556648	52560771	AC005220.3	chr20	52674027	52680156	221	114	75	136.667
416678	chr20	52556648	52560771	AC005220.3	chr20	52811249	52817071	75	33	26	44.6667
281994	chr17	14112611	14117729	AC005224.2	chr17	13508042	13514496	13	12	12	12.3333
281994	chr17	14112611	14117729	AC005224.2	chr17	14118876	14126277	169	125	202	165.333
281994	chr17	14112611	14117729	AC005224.2	chr17	14830311	14836555	21	20	32	24.3333
226887	chr14	73906576	73921687	AC005280.2	chr14	73925446	73925698	291	144	170	201.667
281003	chr17	10956285	10958706	AC005284.1	chr17	10961021	10964327	305	243	167	238.333
280888	chr17	10436767	10461060	AC005323.1	chr17	10465577	10466777	91	53	41	61.6667
281492	chr17	12607530	12615124	AC005358.3	chr17	12616657	12620431	438	150	183	257
599092	chr5	142028309	142037056	AC005370.1	chr5	141531997	141540318	12	21	17	16.6667
599092	chr5	142028309	142037056	AC005370.1	chr5	142015087	142018167	205	168	137	170
599092	chr5	142028309	142037056	AC005370.1	chr5	142266489	142273576	48	25	28	33.6667
706942	chr7	157394807	157419983	AC005481.5	chr7	157386590	157393732	157	206	46	136.333
673330	chr7	39443814	39453173	AC005483.3	chr7	39441846	39457084	175	138	147	153.333
322380	chr19	13472343	13487123	AC005513.1	chr19	13461416	13467307	96	156	75	109
706699	chr7	156449637	156452943	AC005534.8	chr7	156445416	156459865	141	122	131	131.333
706699	chr7	156449637	156452943	AC005534.8	chr7	156601755	156606347	22	19	15	18.6667
706703	chr7	156467718	156471115	AC005534.9	chr7	155601068	155605496	21	16	5	14
706703	chr7	156467718	156471115	AC005534.9	chr7	156471235	156475067	350	207	225	260.667
293990	chr17	65017447	65035836	AC005544.1	chr17	64199128	64213994	6	6	3	5
293990	chr17	65017447	65035836	AC005544.1	chr17	65045184	65049456	152	202	98	150.667
281025	chr17	11030374	11041661	AC005548.2	chr17	11042198	11048380	124	75	69	89.3333
665944	chr7	15705934	15710548	AC005550.3	chr7	15718688	15719039	183	151	137	157
328764	chr19	42067130	42072031	AC005626.1	chr19	42063473	42065467	896	472	519	629
281060	chr17	11169777	11171608	AC005725.1	chr17	11163438	11169212	399	452	378	409.667
598917	chr5	141358041	141365080	AC005740.5	chr5	141052150	141071393	6	4	8	6
598917	chr5	141358041	141365080	AC005740.5	chr5	141519259	141525570	30	18	26	24.6667
598689	chr5	140532451	140539223	AC005754.1	chr5	140541107	140546580	112	71	65	82.6667
282158	chr17	14678861	14683932	AC005863.1	chr17	13491044	13498956	4	8	3	5
282158	chr17	14678861	14683932	AC005863.1	chr17	13818786	13833873	5	6	6	5.66667
793794	chrX	30332281	30337512	AC005926.1	chrX	30323047	30324292	66	20	37	41
282571	chr17	16219732	16239233	AC005971.3	chr17	16216449	16217227	227	202	156	195
666076	chr7	16128615	16132568	AC006035.2	chr7	16135729	16137647	205	110	134	149.667
666076	chr7	16128615	16132568	AC006035.2	chr7	16591222	16600970	46	21	27	31.3333
663468	chr7	8153167	8156322	AC006042.6	chr7	8157100	8157501	476	352	434	420.667
684583	chr7	81638222	81640005	AC006145.4	chr7	81131151	81137369	50	23	31	34.6667
684583	chr7	81638222	81640005	AC006145.4	chr7	81634836	81640686	116	174	196	162
694986	chr7	116210079	116213191	AC006159.4	chr7	115897798	115904032	82	40	39	53.6667
694986	chr7	116210079	116213191	AC006159.4	chr7	116201521	116204180	414	226	241	293.667
694980	chr7	116182823	116192788	AC006159.5	chr7	115905830	115912445	62	55	35	50.6667
694980	chr7	116182823	116192788	AC006159.5	chr7	116195909	116200733	443	288	250	327
500997	chr4	17608919	17616354	AC006160.5	chr4	17606084	17607429	535	322	405	420.667
500997	chr4	17608919	17616354	AC006160.5	chr4	17799106	17810108	30	24	13	22.3333
321691	chr19	9343318	9353405	AC006271.2	chr19	9356576	9357119	143	121	66	110
320784	chr19	2906665	2917330	AC006277.2	chr19	2923283	2934464	253	288	157	232.667
313206	chr18	53858306	53862432	AC006305.1	chr18	53849710	53856574	179	136	146	153.667
685217	chr7	83545597	83552907	AC006322.1	chr7	83556267	83559573	241	131	175	182.333
685217	chr7	83545597	83552907	AC006322.1	chr7	84098809	84111343	15	8	9	10.6667
685217	chr7	83545597	83552907	AC006322.1	chr7	84649783	84660491	37	48	35	40
342797	chr2	37826702	37832022	AC006369.2	chr2	37833929	37836339	452	230	233	305
833126	chrY	15778782	15781202	AC006371.1	chrY	15775179	15776272	25	20	25	23.3333
706921	chr7	157310478	157323885	AC006372.1	chr7	157329264	157329966	372	453	240	355
706918	chr7	157303401	157307949	AC006372.6	chr7	157307969	157310477	97	137	76	103.333
671038	chr7	31830858	31834729	AC006377.1	chr7	31835004	31848588	819	287	605	570.333
671038	chr7	31830858	31834729	AC006377.1	chr7	32083323	32091313	93	44	41	59.3333
671038	chr7	31830858	31834729	AC006377.1	chr7	32238035	32248541	25	41	21	29
688428	chr7	93596333	93601243	AC006378.2	chr7	93594890	93595053	230	192	215	212.333
688428	chr7	93596333	93601243	AC006378.2	chr7	93711190	93723018	16	12	16	14.6667
670911	chr7	31353919	31359988	AC006380.1	chr7	31348182	31353216	218	128	148	164.667
279153	chr17	2314092	2319703	AC006435.1	chr17	1970163	1989909	20	23	17	20
279153	chr17	2314092	2319703	AC006435.1	chr17	2305925	2307732	499	491	292	427.333
702188	chr7	140273589	140281339	AC006452.1	chr7	140285197	140295274	154	157	96	135.667
388350	chr2	191569644	191574683	AC006460.2	chr2	191576504	191580579	429	302	322	351
663326	chr7	7670628	7680978	AC006465.3	chr7	7682482	7685379	74	140	87	100.333
663326	chr7	7670628	7680978	AC006465.3	chr7	8002662	8007421	7	11	12	10
301841	chr18	14117699	14124966	AC006557.2	chr18	14112378	14114992	92	21	60	57.6667
147973	chr12	21560223	21566894	AC006559.1	chr12	21551599	21558427	250	73	182	168.333
672450	chr7	36501010	36504170	AC006960.7	chr7	36490877	36496061	199	171	129	166.333
672450	chr7	36501010	36504170	AC006960.7	chr7	37225132	37236225	41	43	13	32.3333
686711	chr7	88269219	88272948	AC006988.1	chr7	88264809	88266546	275	134	147	185.333
667428	chr7	20171189	20182032	AC007001.4	chr7	19794245	19804342	11	6	11	9.33333
667428	chr7	20171189	20182032	AC007001.4	chr7	20183873	20187163	305	198	189	230.667
667428	chr7	20171189	20182032	AC007001.4	chr7	20346880	20352838	17	13	13	14.3333
667428	chr7	20171189	20182032	AC007001.4	chr7	20622338	20639529	15	5	10	10
394370	chr2	210893932	210895712	AC007038.7	chr2	210379504	210385822	7	5	7	6.33333
394370	chr2	210893932	210895712	AC007038.7	chr2	210885660	210886566	276	122	217	205
394370	chr2	210893932	210895712	AC007038.7	chr2	211339723	211340197	5	5	4	4.66667
352998	chr2	71215399	71238800	AC007040.6	chr2	71206828	71210054	16	30	24	23.3333
352987	chr2	71171022	71181375	AC007040.7	chr2	70531258	70547338	19	14	11	14.6667
352987	chr2	71171022	71181375	AC007040.7	chr2	71015355	71016446	73	49	53	58.3333
430243	chr22	20874573	20891767	AC007050.17	chr22	20866273	20872761	430	297	292	339.667
228118	chr14	78856357	78870336	AC007056.1	chr14	78873507	78873672	69	30	76	58.3333
670231	chr7	29127728	29130040	AC007096.1	chr7	28967121	28980724	18	30	21	23
670231	chr7	29127728	29130040	AC007096.1	chr7	29131439	29134984	359	255	174	262.667
670231	chr7	29127728	29130040	AC007096.1	chr7	29430589	29444486	8	9	8	8.33333
350586	chr2	63083481	63093347	AC007098.1	chr2	63094055	63094401	33	18	27	26
354213	chr2	75699717	75702099	AC007099.2	chr2	74911600	74914337	5	4	2	3.66667
354213	chr2	75699717	75702099	AC007099.2	chr2	75152936	75154388	7	11	10	9.33333
354213	chr2	75699717	75702099	AC007099.2	chr2	75334357	75349207	6	14	13	11
354213	chr2	75699717	75702099	AC007099.2	chr2	75690804	75696000	228	158	181	189
349523	chr2	59467626	59474178	AC007131.1	chr2	59462352	59479691	273	209	198	226.667
349523	chr2	59467626	59474178	AC007131.1	chr2	60305383	60309314	12	10	4	8.66667
349549	chr2	59548855	59555328	AC007131.2	chr2	59546614	59548758	100	64	71	78.3333
349617	chr2	59757998	59764017	AC007179.1	chr2	60133430	60151456	5	21	5	10.3333
227428	chr14	76041807	76048096	AC007182.1	chr14	76035473	76041772	222	87	92	133.667
227428	chr14	76041807	76048096	AC007182.1	chr14	76116080	76126595	137	61	58	85.3333
391864	chr2	202703438	202707658	AC007242.1	chr2	202702583	202717571	578	438	572	529.333
391864	chr2	202703438	202707658	AC007242.1	chr2	203035206	203044606	56	58	55	56.3333
360745	chr2	102796770	102798587	AC007271.3	chr2	102495811	102507521	26	35	28	29.6667
360745	chr2	102796770	102798587	AC007271.3	chr2	102630597	102636590	87	86	44	72.3333
360745	chr2	102796770	102798587	AC007271.3	chr2	102789465	102790458	586	449	417	484
360745	chr2	102796770	102798587	AC007271.3	chr2	103051832	103068768	21	18	14	17.6667
670505	chr7	30020860	30031878	AC007285.6	chr7	30017393	30020819	396	205	230	277
670528	chr7	30114142	30117439	AC007285.7	chr7	30118283	30121159	294	235	177	235.333
670528	chr7	30114142	30117439	AC007285.7	chr7	30428450	30444725	17	22	15	18
430286	chr22	21074475	21084073	AC007308.1	chr22	21100825	21112280	76	102	81	86.3333
672378	chr7	36267377	36276565	AC007327.5	chr7	36263238	36281977	26	10	28	21.3333
268707	chr16	52281792	52289815	AC007333.1	chr16	52291954	52298360	330	232	76	212.667
268010	chr16	49689083	49714490	AC007339.1	chr16	49686792	49687357	112	169	89	123.333
672551	chr7	36873585	36884968	AC007349.7	chr7	36889970	36891582	202	100	130	144
672551	chr7	36873585	36884968	AC007349.7	chr7	37224933	37236225	11	10	8	9.66667
391895	chr2	202817838	202818898	AC007358.1	chr2	202811155	202813601	445	370	309	374.667
393006	chr2	206624678	206641859	AC007362.3	chr2	206618306	206622607	322	295	179	265.333
351209	chr2	65002925	65007574	AC007365.1	chr2	64878312	64881920	37	36	23	32
351209	chr2	65002925	65007574	AC007365.1	chr2	65010613	65019370	900	342	217	486.333
393097	chr2	206976307	206983973	AC007383.4	chr2	206984839	206985840	411	289	295	331.667
351277	chr2	65272002	65280740	AC007386.4	chr2	65652103	65668940	11	5	4	6.66667
342660	chr2	37421923	37427666	AC007390.5	chr2	37421134	37439286	172	111	100	127.667
342749	chr2	37672593	37690496	AC007391.1	chr2	37665578	37670628	55	25	30	36.6667
342749	chr2	37672593	37690496	AC007391.1	chr2	38073220	38089443	7	3	5	5
352920	chr2	70907748	70915617	AC007395.3	chr2	70917385	70923813	141	107	107	118.333
342452	chr2	36770420	36781752	AC007401.2	chr2	36763311	36763815	184	135	117	145.333
342452	chr2	36770420	36781752	AC007401.2	chr2	37001032	37010698	15	10	10	11.6667
346965	chr2	51657421	51664215	AC007402.1	chr2	51653314	51655991	179	143	106	142.667
381994	chr2	171568282	171575554	AC007405.2	chr2	171261574	171264312	33	39	17	29.6667
382013	chr2	171638259	171641967	AC007405.7	chr2	171248089	171256810	77	41	41	53
382013	chr2	171638259	171641967	AC007405.7	chr2	171438879	171446096	52	24	32	36
382013	chr2	171638259	171641967	AC007405.7	chr2	171635584	171647390	817	552	464	611
291621	chr17	55808976	55828271	AC007431.1	chr17	55829598	55835138	167	174	115	152
144113	chr12	9279208	9287943	AC007436.1	chr12	9273212	9273654	199	124	146	156.333
144937	chr12	11694590	11696292	AC007450.1	chr12	11692659	11692869	290	238	260	262.667
144937	chr12	11694590	11696292	AC007450.1	chr12	12187156	12203866	18	11	7	12
144937	chr12	11694590	11696292	AC007450.1	chr12	12469060	12469239	10	4	5	6.33333
820002	chrX	120460099	120468608	AC007486.1	chrX	120155642	120171228	7	6	3	5.33333
820002	chrX	120460099	120468608	AC007486.1	chrX	120456560	120456765	81	59	78	72.6667
146384	chr12	16560246	16569197	AC007528.1	chr12	16581349	16583781	72	39	37	49.3333
145537	chr12	13739260	13744348	AC007535.1	chr12	13733373	13737953	597	263	429	429.667
672280	chr7	35878511	35889686	AC007551.1	chr7	35743583	35750068	29	36	23	29.3333
672280	chr7	35878511	35889686	AC007551.1	chr7	35866857	35877125	117	67	74	86
381490	chr2	169956259	169964906	AC007556.3	chr2	169820354	169821920	178	116	115	136.333
381490	chr2	169956259	169964906	AC007556.3	chr2	169952750	169954374	440	251	295	328.667
396624	chr2	217734628	217739661	AC007557.1	chr2	217741055	217743228	525	386	330	413.667
396624	chr2	217734628	217739661	AC007557.1	chr2	218151034	218157253	10	5	10	8.33333
396621	chr2	217713111	217719878	AC007557.4	chr2	217991296	218008780	21	17	14	17.3333
261359	chr16	12180269	12184172	AC007601.1	chr16	12185147	12202393	192	189	124	168.333
268224	chr16	50645927	50648567	AC007608.1	chr16	50037685	50048927	25	8	8	13.6667
268224	chr16	50645927	50648567	AC007608.1	chr16	50650427	50651379	959	945	706	870
267733	chr16	48684084	48687486	AC007611.1	chr16	48678445	48681442	42	12	35	29.6667
490951	chr3	179112683	179117920	AC007620.3	chr3	179111203	179120922	468	207	284	319.667
490951	chr3	179112683	179117920	AC007620.3	chr3	179298448	179306873	34	35	40	36.3333
145190	chr12	12507457	12515147	AC007621.1	chr12	11728140	11730722	14	22	18	18
145190	chr12	12507457	12515147	AC007621.1	chr12	12226442	12238939	44	30	18	30.6667
145190	chr12	12507457	12515147	AC007621.1	chr12	12515342	12520055	520	191	201	304
393060	chr2	206849773	206862955	AC007679.3	chr2	206867008	206867378	315	203	265	261
346801	chr2	51166414	51173621	AC007682.1	chr2	51176892	51181845	268	107	210	195
346808	chr2	51185620	51189733	AC007682.2	chr2	51181846	51185408	157	70	77	101.333
379438	chr2	163623892	163626890	AC007740.1	chr2	163621172	163623056	123	67	102	97.3333
379236	chr2	163013915	163023237	AC007750.5	chr2	163025085	163031520	504	252	310	355.333
294312	chr17	66382529	66387178	AC007780.1	chr17	66376040	66391929	42	124	59	75
175153	chr12	110205640	110213215	AC007834.3	chr12	110214440	110219563	228	233	194	218.333
227188	chr14	75179298	75195674	AC007956.1	chr14	74955837	74963875	17	17	13	15.6667
227188	chr14	75179298	75195674	AC007956.1	chr14	75173441	75177266	325	215	162	234
700011	chr7	132714971	132721968	AC008038.1	chr7	132724011	132726967	619	325	403	449
228191	chr14	79082516	79084562	AC008045.1	chr14	78483609	78502207	18	21	9	16
228191	chr14	79082516	79084562	AC008045.1	chr14	78897674	78917527	17	30	18	21.6667
228191	chr14	79082516	79084562	AC008045.1	chr14	79085815	79089409	392	444	258	364.667
706367	chr7	155301716	155306664	AC008060.5	chr7	155295511	155298597	296	181	163	213.333
706333	chr7	155173835	155182619	AC008060.7	chr7	155169027	155172426	161	158	167	162
706350	chr7	155247684	155262051	AC008060.8	chr7	154713714	154729408	14	22	8	14.6667
706350	chr7	155247684	155262051	AC008060.8	chr7	155242815	155244876	274	374	178	275.333
706350	chr7	155247684	155262051	AC008060.8	chr7	156442810	156459865	3	3	2	2.66667
379207	chr2	162928826	162933700	AC008063.2	chr2	162924656	162927143	281	331	341	317.667
355847	chr2	80843106	80846853	AC008067.2	chr2	80840595	80841720	195	185	177	185.667
336791	chr2	17022736	17028169	AC008069.1	chr2	17030636	17034350	517	330	303	383.333
336791	chr2	17022736	17028169	AC008069.1	chr2	17488724	17495553	24	25	13	20.6667
336794	chr2	17034351	17039791	AC008069.2	chr2	16129094	16147177	3	3	3	3
336794	chr2	17034351	17039791	AC008069.2	chr2	17028170	17042143	203	148	178	176.333
336794	chr2	17034351	17039791	AC008069.2	chr2	17484694	17493199	11	9	7	9
338984	chr2	24295863	24302128	AC008073.5	chr2	24046200	24047787	83	45	40	56
338984	chr2	24295863	24302128	AC008073.5	chr2	24281136	24290674	609	192	404	401.667
339005	chr2	24396269	24400364	AC008073.7	chr2	24390476	24395815	172	105	178	151.667
339014	chr2	24423614	24425787	AC008073.9	chr2	24425912	24431112	304	271	234	269.667
351094	chr2	64676041	64685208	AC008074.3	chr2	64119115	64138240	7	4	4	5
351094	chr2	64676041	64685208	AC008074.3	chr2	64272779	64277854	34	22	25	27
351094	chr2	64676041	64685208	AC008074.3	chr2	64685552	64686076	480	250	246	325.333
699676	chr7	131536573	131538666	AC008085.1	chr7	131529713	131544640	368	591	363	440.667
699676	chr7	131536573	131538666	AC008085.1	chr7	131725318	131736951	66	41	33	46.6667
699676	chr7	131536573	131538666	AC008085.1	chr7	132251743	132263587	10	18	6	11.3333
700407	chr7	134070085	134076097	AC008154.1	chr7	133724063	133738417	4	5	3	4
700407	chr7	134070085	134076097	AC008154.1	chr7	134065863	134082280	41	60	30	43.6667
292733	chr17	60230858	60239188	AC008158.1	chr17	60228176	60230079	121	90	91	100.667
386782	chr2	186664132	186666379	AC008174.3	chr2	186658945	186672598	511	254	313	359.333
386782	chr2	186664132	186666379	AC008174.3	chr2	187013358	187020846	22	9	8	13
336458	chr2	15828658	15834232	AC008271.1	chr2	15822467	15824624	143	110	103	118.667
378308	chr2	160242682	160244321	AC008277.1	chr2	159759325	159769486	18	14	25	19
378308	chr2	160242682	160244321	AC008277.1	chr2	160237369	160241718	436	254	350	346.667
378308	chr2	160242682	160244321	AC008277.1	chr2	160541845	160555790	36	24	18	26
336419	chr2	15701485	15705850	AC008278.2	chr2	15696011	15712784	259	150	286	231.667
336419	chr2	15701485	15705850	AC008278.2	chr2	16674945	16688937	8	9	6	7.66667
336454	chr2	15818632	15822432	AC008278.3	chr2	15822467	15828657	45	16	34	31.6667
581851	chr5	86534776	86538784	AC008394.1	chr5	86531968	86533544	854	305	429	529.333
331084	chr19	54373773	54391658	AC008440.5	chr19	54394837	54398205	245	384	157	262
327527	chr19	35321278	35324100	AC008555.3	chr19	35314280	35315393	367	223	207	265.667
578666	chr5	76431806	76434805	AC008581.1	chr5	76423684	76431016	302	183	215	233.333
578666	chr5	76431806	76434805	AC008581.1	chr5	76723217	76732494	63	29	46	46
584649	chr5	95187970	95189230	AC008592.4	chr5	95198707	95200213	95	80	64	79.6667
584649	chr5	95187970	95189230	AC008592.4	chr5	95463425	95481201	16	11	6	11
584649	chr5	95187970	95189230	AC008592.4	chr5	95669358	95676676	17	34	16	22.3333
584649	chr5	95187970	95189230	AC008592.4	chr5	95938086	95945961	22	23	5	16.6667
584651	chr5	95191249	95198706	AC008592.5	chr5	94977314	94990783	78	21	23	40.6667
584651	chr5	95191249	95198706	AC008592.5	chr5	95202959	95204496	220	121	135	158.667
584651	chr5	95191249	95198706	AC008592.5	chr5	95479427	95486553	42	22	14	26
584651	chr5	95191249	95198706	AC008592.5	chr5	95671361	95676676	74	37	44	51.6667
584651	chr5	95191249	95198706	AC008592.5	chr5	95939121	95945961	17	16	15	16
728702	chr8	74183162	74188264	AC008598.1	chr8	74175965	74191726	157	91	258	168.667
602715	chr5	153717005	153720295	AC008625.1	chr5	152929651	152947992	5	5	5	5
602715	chr5	153717005	153720295	AC008625.1	chr5	153710253	153716621	323	194	190	235.667
603608	chr5	156800655	156804320	AC008676.1	chr5	156807857	156809004	377	305	275	319
603608	chr5	156800655	156804320	AC008676.1	chr5	157383371	157396923	6	5	5	5.33333
331168	chr19	54935995	54949473	AC008746.3	chr19	54950627	54955080	172	195	119	162
598817	chr5	140997436	141001348	AC008781.7	chr5	141211737	141222363	20	14	10	14.6667
567729	chr5	40793690	40802064	AC008810.1	chr5	39923002	39941008	3	4	7	4.66667
567729	chr5	40793690	40802064	AC008810.1	chr5	40781704	40788633	176	107	88	123.667
573787	chr5	60850090	60854961	AC008836.1	chr5	59773244	59792080	3	3	2	2.66667
573787	chr5	60850090	60854961	AC008836.1	chr5	60355581	60361449	24	12	7	14.3333
573787	chr5	60850090	60854961	AC008836.1	chr5	60859915	60863414	381	258	237	292
566699	chr5	37801580	37802300	AC008869.1	chr5	37806955	37808569	391	434	288	371
566699	chr5	37801580	37802300	AC008869.1	chr5	38187940	38191818	45	35	11	30.3333
572230	chr5	56154298	56165554	AC008937.2	chr5	55248335	55264254	17	19	9	15
572230	chr5	56154298	56165554	AC008937.2	chr5	55567803	55573205	48	25	30	34.3333
572230	chr5	56154298	56165554	AC008937.2	chr5	55744527	55746916	27	23	17	22.3333
572230	chr5	56154298	56165554	AC008937.2	chr5	56165840	56169853	245	132	136	171
564950	chr5	32378290	32379816	AC008949.1	chr5	32123866	32135580	17	9	9	11.6667
564950	chr5	32378290	32379816	AC008949.1	chr5	32249045	32255466	39	21	24	28
564950	chr5	32378290	32379816	AC008949.1	chr5	32383552	32384456	279	118	208	201.667
597206	chr5	135048409	135058021	AC009009.1	chr5	134904969	134920615	35	46	24	35
597206	chr5	135048409	135058021	AC009009.1	chr5	135058378	135058803	262	193	175	210
258956	chr16	1029620	1036012	AC009041.2	chr16	1036134	1039471	426	290	329	348.333
278504	chr16	89231413	89240729	AC009113.2	chr16	89011312	89015141	79	110	71	86.6667
261222	chr16	11428923	11444698	AC009121.1	chr16	11447315	11452430	566	490	329	461.667
277591	chr16	84225815	84257830	AC009123.1	chr16	84261133	84262442	19	18	12	16.3333
277403	chr16	83434090	83438391	AC009142.1	chr16	83438856	83442832	204	175	90	156.333
276333	chr16	79702029	79710780	AC009159.1	chr16	79697132	79701185	329	276	229	278
393473	chr2	208174591	208175887	AC009226.1	chr2	207663982	207670742	35	29	49	37.6667
393473	chr2	208174591	208175887	AC009226.1	chr2	208021970	208024035	91	63	61	71.6667
393473	chr2	208174591	208175887	AC009226.1	chr2	208164029	208173463	1150	776	338	754.667
376766	chr2	155308983	155314644	AC009227.2	chr2	154342781	154355157	4	5	3	4
376766	chr2	155308983	155314644	AC009227.2	chr2	155304405	155306576	512	261	259	344
376766	chr2	155308983	155314644	AC009227.2	chr2	156164020	156171572	42	27	24	31
346725	chr2	50922472	50929597	AC009234.1	chr2	50914400	50933196	205	135	124	154.667
346725	chr2	50922472	50929597	AC009234.1	chr2	51674429	51692805	5	5	6	5.33333
346725	chr2	50922472	50929597	AC009234.1	chr2	51858830	51875718	8	3	4	5
378964	chr2	162199599	162208201	AC009299.1	chr2	162208323	162216441	250	152	121	174.333
378936	chr2	162108416	162118044	AC009299.2	chr2	162094370	162100079	126	110	67	101
365459	chr2	118749134	118755558	AC009303.1	chr2	118578644	118583497	55	30	35	40
365459	chr2	118749134	118755558	AC009303.1	chr2	119626177	119631990	8	9	6	7.66667
365459	chr2	118749134	118755558	AC009303.1	chr2	120129846	120144045	10	9	4	7.66667
365390	chr2	118555596	118563122	AC009312.1	chr2	118544882	118548592	150	81	62	97.6667
378896	chr2	162013468	162020247	AC009313.1	chr2	162009559	162021227	583	139	175	299
699924	chr7	132443212	132448012	AC009365.4	chr7	132434530	132436278	203	233	171	202.333
699924	chr7	132443212	132448012	AC009365.4	chr7	133105591	133109705	8	6	8	7.33333
663414	chr7	7986211	7991370	AC009473.1	chr7	7976381	7983420	311	157	254	240.667
381369	chr2	169641295	169644449	AC009475.2	chr2	169178971	169193319	21	17	16	18
374592	chr2	148659912	148660536	AC009480.3	chr2	147814149	147827317	37	36	24	32.3333
374592	chr2	148659912	148660536	AC009480.3	chr2	148396573	148401273	45	30	30	35
374592	chr2	148659912	148660536	AC009480.3	chr2	148653387	148658465	793	240	335	456
378991	chr2	162278434	162285226	AC009487.4	chr2	162275757	162286298	394	410	370	391.333
378991	chr2	162278434	162285226	AC009487.4	chr2	162433683	162444114	16	23	17	18.6667
378991	chr2	162278434	162285226	AC009487.4	chr2	162796720	162810780	20	20	14	18
378991	chr2	162278434	162285226	AC009487.4	chr2	162981369	162994641	15	12	15	14
378991	chr2	162278434	162285226	AC009487.4	chr2	163198061	163213739	13	10	4	9
350652	chr2	63274196	63276073	AC009501.4	chr2	62681183	62686686	27	29	10	22
350652	chr2	63274196	63276073	AC009501.4	chr2	63007359	63026228	27	19	12	19.3333
350652	chr2	63274196	63276073	AC009501.4	chr2	63268692	63270099	517	349	295	387
361840	chr2	106471337	106474382	AC009505.2	chr2	106195203	106199429	37	21	18	25.3333
361840	chr2	106471337	106474382	AC009505.2	chr2	106466603	106468950	762	550	467	593
378381	chr2	160470703	160474295	AC009506.1	chr2	159750226	159768619	9	7	7	7.66667
378381	chr2	160470703	160474295	AC009506.1	chr2	160465629	160466535	270	182	184	212
699951	chr7	132514929	132517014	AC009518.8	chr7	132518673	132522960	547	384	555	495.333
699951	chr7	132514929	132517014	AC009518.8	chr7	133103637	133109705	14	14	13	13.6667
700651	chr7	134878946	134885205	AC009542.2	chr7	134686525	134690985	45	29	23	32.3333
700651	chr7	134878946	134885205	AC009542.2	chr7	134885224	134892443	784	572	480	612
249922	chr15	70017141	70023265	AC009677.1	chr15	69876925	69882005	66	56	42	54.6667
249922	chr15	70017141	70023265	AC009677.1	chr15	70014794	70016593	416	244	254	304.667
249922	chr15	70017141	70023265	AC009677.1	chr15	70379375	70382050	35	34	34	34.3333
249922	chr15	70017141	70023265	AC009677.1	chr15	70547417	70554336	19	21	10	16.6667
249922	chr15	70017141	70023265	AC009677.1	chr15	70775928	70795924	33	27	10	23.3333
700958	chr7	135926229	135930509	AC009784.1	chr7	135921974	135936883	202	257	232	230.333
700958	chr7	135926229	135930509	AC009784.1	chr7	136981438	136989264	4	6	4	4.66667
305802	chr18	30104299	30111824	AC009835.1	chr18	30114963	30117192	141	74	108	107.667
400597	chr2	231033334	231037959	AC009950.2	chr2	230877234	230884662	72	45	57	58
400597	chr2	231033334	231037959	AC009950.2	chr2	231032134	231049336	295	364	309	322.667
400597	chr2	231033334	231037959	AC009950.2	chr2	231237801	231242485	35	30	24	29.6667
349948	chr2	60722184	60725012	AC009970.1	chr2	59524454	59533605	11	14	17	14
349948	chr2	60722184	60725012	AC009970.1	chr2	60716673	60720944	562	502	390	484.667
400537	chr2	230856524	230861388	AC009973.1	chr2	230872818	230877233	85	61	50	65.3333
400537	chr2	230856524	230861388	AC009973.1	chr2	231014721	231023219	46	29	17	30.6667
99898	chr10	125494351	125510302	AC009987.1	chr10	125518984	125519797	63	58	40	53.6667
242481	chr15	44822817	44829911	AC009996.1	chr15	44578112	44591948	22	17	7	15.3333
242481	chr15	44822817	44829911	AC009996.1	chr15	44815653	44821505	295	192	233	240
245938	chr15	56050721	56059493	AC009997.1	chr15	56062778	56065377	285	189	209	227.667
666841	chr7	18469758	18490399	AC010082.2	chr7	18491450	18493239	260	172	139	190.333
380517	chr2	166935132	166948926	AC010127.3	chr2	166925050	166926784	113	67	56	78.6667
380476	chr2	166787508	166792582	AC010127.5	chr2	166247537	166260560	13	15	6	11.3333
380476	chr2	166787508	166792582	AC010127.5	chr2	166777912	166779626	141	92	98	110.333
396965	chr2	218837220	218846235	AC010136.2	chr2	218846312	218849045	269	278	234	260.333
370785	chr2	137300815	137304108	AC010146.1	chr2	137295654	137296237	347	326	282	318.333
370785	chr2	137300815	137304108	AC010146.1	chr2	137886521	137898855	4	3	3	3.33333
370785	chr2	137300815	137304108	AC010146.1	chr2	138208761	138222030	7	6	4	5.66667
370785	chr2	137300815	137304108	AC010146.1	chr2	138567660	138587396	8	12	7	9
339383	chr2	25939081	25945218	AC010150.1	chr2	25949746	25957412	92	65	69	75.3333
476661	chr3	134126245	134129192	AC010207.1	chr3	134120997	134124590	441	459	354	418
172511	chr12	101048492	101052686	AC010209.1	chr12	100773353	100786705	30	24	24	26
172511	chr12	101048492	101052686	AC010209.1	chr12	101057580	101069766	204	127	123	151.333
590975	chr5	114937005	114941483	AC010226.4	chr5	114637936	114638714	118	97	74	96.3333
590975	chr5	114937005	114941483	AC010226.4	chr5	115184962	115185674	40	34	30	34.6667
590975	chr5	114937005	114941483	AC010226.4	chr5	115394080	115405506	31	14	12	19
591074	chr5	115288934	115299576	AC010282.1	chr5	115300388	115306519	277	203	293	257.667
591074	chr5	115288934	115299576	AC010282.1	chr5	115695117	115710553	8	5	3	5.33333
602636	chr5	153469738	153475565	AC010295.1	chr5	152888183	152907506	11	6	5	7.33333
602636	chr5	153469738	153475565	AC010295.1	chr5	153775029	153790880	31	44	20	31.6667
609392	chr5	175875815	175882043	AC010297.1	chr5	175138423	175156408	4	9	5	6
330453	chr19	51319574	51336187	AC010325.1	chr19	51342619	51344567	110	202	95	135.667
331844	chr19	58356761	58384597	AC010326.1	chr19	58348519	58351662	124	73	59	85.3333
321490	chr19	7964624	7985867	AC010336.2	chr19	7955999	7961980	50	110	48	69.3333
565785	chr5	35034176	35037074	AC010368.1	chr5	35042094	35042323	368	316	286	323.333
575869	chr5	67262227	67272248	AC010376.1	chr5	67257257	67274902	284	135	217	212
575869	chr5	67262227	67272248	AC010376.1	chr5	67535005	67547492	29	19	16	21.3333
563594	chr5	27984805	27988774	AC010455.1	chr5	27993200	27994860	13	7	28	16
330024	chr19	48552650	48555114	AC010458.1	chr19	48556362	48567084	82	85	81	82.6667
589528	chr5	110603795	110607566	AC010468.2	chr5	110089298	110108230	33	20	9	20.6667
278289	chr16	87734983	87747486	AC010536.1	chr16	87748635	87757997	217	404	151	257.333
271829	chr16	62858452	62863213	AC010546.1	chr16	62852019	62866987	344	492	304	380
603568	chr5	156654508	156666310	AC010609.1	chr5	156645693	156648583	200	151	144	165
384455	chr2	179499966	179504080	AC010680.1	chr2	179494615	179496370	159	138	118	138.333
393255	chr2	207473769	207475203	AC010731.2	chr2	207467752	207478469	184	132	131	149
393275	chr2	207503231	207509772	AC010731.3	chr2	207498374	207514643	620	465	429	504.667
344061	chr2	41820977	41823735	AC010739.1	chr2	41826363	41832454	100	71	104	91.6667
303026	chr18	21472406	21475822	AC010754.1	chr18	21467520	21471692	244	140	157	180.333
303026	chr18	21472406	21475822	AC010754.1	chr18	21692518	21699624	35	23	18	25.3333
736007	chr8	97655976	97662338	AC010859.1	chr8	97344524	97349987	39	23	27	29.6667
736007	chr8	97655976	97662338	AC010859.1	chr8	97652655	97655624	362	298	262	307.333
736007	chr8	97655976	97662338	AC010859.1	chr8	97854532	97862469	50	44	25	39.6667
736007	chr8	97655976	97662338	AC010859.1	chr8	98120171	98127363	26	7	15	16
736007	chr8	97655976	97662338	AC010859.1	chr8	98561477	98572477	11	19	11	13.6667
338123	chr2	21344865	21349759	AC010872.2	chr2	21340471	21343332	262	180	127	189.667
338123	chr2	21344865	21349759	AC010872.2	chr2	21977553	21986383	8	5	7	6.66667
344502	chr2	43455071	43460452	AC010883.5	chr2	43467329	43472690	106	100	81	95.6667
344502	chr2	43455071	43460452	AC010883.5	chr2	43708977	43711709	110	56	91	85.6667
332904	chr2	3651725	3655755	AC010907.2	chr2	3662192	3666952	122	105	84	103.667
103230	chr11	4463939	4472503	AC010930.1	chr11	4206213	4216459	25	46	15	28.6667
103230	chr11	4463939	4472503	AC010930.1	chr11	4458869	4476395	687	399	541	542.333
334815	chr2	10141130	10167070	AC010969.1	chr2	9938282	9951633	12	19	8	13
705190	chr7	150720024	150728615	AC010973.1	chr7	150731900	150739103	478	474	243	398.333
369589	chr2	133415643	133418532	AC010974.3	chr2	133421101	133428934	321	253	192	255.333
355485	chr2	79726832	79729925	AC010975.1	chr2	79731142	79735631	187	122	178	162.333
368206	chr2	128224215	128225863	AC010976.2	chr2	128228437	128229809	447	320	362	376.333
368206	chr2	128224215	128225863	AC010976.2	chr2	128871253	128886558	4	3	5	4
398171	chr2	223182946	223186906	AC010980.2	chr2	223191010	223194991	385	164	199	249.333
398171	chr2	223182946	223186906	AC010980.2	chr2	223415270	223420089	88	73	49	70
85650	chr10	77152036	77167684	AC010997.1	chr10	77171382	77176267	123	129	98	116.667
85650	chr10	77152036	77167684	AC010997.1	chr10	77298913	77305520	36	42	16	31.3333
85650	chr10	77152036	77167684	AC010997.1	chr10	77664315	77681351	52	46	18	38.6667
85650	chr10	77152036	77167684	AC010997.1	chr10	77797452	77799138	26	38	22	28.6667
85650	chr10	77152036	77167684	AC010997.1	chr10	78059618	78069049	13	17	7	12.3333
246296	chr15	57255608	57268106	AC010999.1	chr15	57241817	57244492	53	21	39	37.6667
246296	chr15	57255608	57268106	AC010999.1	chr15	57417333	57426217	35	18	11	21.3333
726618	chr8	67831881	67835836	AC011031.1	chr8	67816124	67830263	239	322	120	227
338840	chr2	23746714	23748787	AC011239.1	chr2	22587685	22593649	3	4	3	3.33333
338840	chr2	23746714	23748787	AC011239.1	chr2	23744995	23745445	132	220	146	166
343104	chr2	38824491	38833092	AC011247.3	chr2	38544820	38561022	13	10	16	13
343104	chr2	38824491	38833092	AC011247.3	chr2	38837142	38839029	469	255	254	326
662432	chr7	3682500	3683828	AC011284.3	chr7	3679292	3681758	242	103	197	180.667
673385	chr7	39600890	39606716	AC011290.4	chr7	38418052	38434235	5	6	8	6.33333
673385	chr7	39600890	39606716	AC011290.4	chr7	38829093	38839626	24	14	14	17.3333
673385	chr7	39600890	39606716	AC011290.4	chr7	39594608	39597915	564	368	370	434
673385	chr7	39600890	39606716	AC011290.4	chr7	39773241	39784213	134	73	81	96
675345	chr7	46798106	46804187	AC011294.3	chr7	46795361	46798000	256	200	214	223.333
495714	chr3	194864153	194868702	AC011325.1	chr3	194394495	194403841	44	40	16	33.3333
495714	chr3	194864153	194868702	AC011325.1	chr3	194869112	194871165	500	368	253	373.667
608684	chr5	173471072	173474167	AC011333.1	chr5	173027629	173034501	23	29	19	23.6667
608684	chr5	173471072	173474167	AC011333.1	chr5	174745041	174765014	7	4	5	5.33333
600490	chr5	146453876	146465843	AC011357.1	chr5	146449708	146450163	209	203	128	180
604616	chr5	160082781	160092590	AC011363.1	chr5	160078111	160094550	291	193	240	241.333
604616	chr5	160082781	160092590	AC011363.1	chr5	160211783	160218956	60	31	25	38.6667
589082	chr5	109216588	109220762	AC011366.3	chr5	109210385	109230346	216	90	107	137.667
608277	chr5	171863813	171879294	AC011407.1	chr5	171859274	171861296	371	447	268	362
328339	chr19	39573814	39596841	AC011443.1	chr19	39602205	39605969	81	111	58	83.3333
328201	chr19	38543471	38546215	AC011465.1	chr19	38546475	38553713	507	702	363	524
324324	chr19	22784025	22790756	AC011467.2	chr19	22795533	22799956	88	159	62	103
321947	chr19	10733589	10757554	AC011475.1	chr19	10718394	10733285	107	118	67	97.3333
321954	chr19	10777033	10778793	AC011475.2	chr19	10786221	10794126	411	446	290	382.333
329783	chr19	46992305	47002560	AC011484.1	chr19	47008270	47011712	124	93	62	93
328932	chr19	42920697	42933052	AC011497.1	chr19	42937624	42938384	261	212	194	222.333
699810	chr7	132031756	132038662	AC011625.1	chr7	132041095	132044950	132	275	99	168.667
699810	chr7	132031756	132038662	AC011625.1	chr7	132245037	132259759	11	24	11	15.3333
743847	chr8	122077979	122083719	AC011626.1	chr8	122069943	122074831	292	190	162	214.667
674589	chr7	43562050	43573443	AC011738.4	chr7	43585011	43586384	96	112	77	95
674589	chr7	43562050	43573443	AC011738.4	chr7	43743675	43754725	7	16	9	10.6667
355813	chr2	80752200	80755142	AC011741.1	chr2	80756897	80758001	406	447	376	409.667
334448	chr2	8821099	8824736	AC011747.7	chr2	7564202	7575376	14	13	6	11
334448	chr2	8821099	8824736	AC011747.7	chr2	8367208	8377387	35	14	19	22.6667
334448	chr2	8821099	8824736	AC011747.7	chr2	8443613	8448599	27	20	19	22
334448	chr2	8821099	8824736	AC011747.7	chr2	8688778	8699516	52	30	21	34.3333
334448	chr2	8821099	8824736	AC011747.7	chr2	8811210	8815510	102	87	71	86.6667
341791	chr2	34628660	34632131	AC011748.1	chr2	34632274	34634080	62	42	52	52
370560	chr2	136566352	136579822	AC011893.3	chr2	136581899	136588696	251	270	141	220.667
370560	chr2	136566352	136579822	AC011893.3	chr2	137138070	137156974	24	12	6	14
707014	chr7	157818448	157820817	AC011899.10	chr7	157825594	157826297	377	541	310	409.333
706982	chr7	157644922	157662476	AC011899.9	chr7	157209850	157227149	33	22	21	25.3333
706982	chr7	157644922	157662476	AC011899.9	chr7	157664144	157665700	217	206	172	198.333
252340	chr15	79268847	79273009	AC011944.1	chr15	79470519	79474469	31	35	14	26.6667
252340	chr15	79268847	79273009	AC011944.1	chr15	79601337	79608337	19	14	6	13
725423	chr8	64114923	64122494	AC011978.1	chr8	63035294	63042638	3	2	4	3
85882	chr10	77883554	77887431	AC012047.1	chr10	77879027	77879237	127	80	154	120.333
243408	chr15	47843264	47845877	AC012050.1	chr15	47841486	47842802	419	235	33	229
714103	chr8	23625837	23626477	AC012119.1	chr8	23622763	23624231	250	286	224	253.333
714103	chr8	23625837	23626477	AC012119.1	chr8	23808743	23827588	7	12	10	9.66667
714103	chr8	23625837	23626477	AC012119.1	chr8	24044681	24057592	13	11	15	13
305881	chr18	30343576	30351087	AC012123.1	chr18	30340698	30343061	104	86	82	90.6667
279668	chr17	5014569	5017238	AC012146.7	chr17	5006138	5012450	230	257	269	252
150442	chr12	29271096	29277741	AC012150.1	chr12	29456363	29464471	39	42	31	37.3333
150442	chr12	29271096	29277741	AC012150.1	chr12	29655001	29660970	9	5	7	7
259818	chr16	5808644	5813214	AC012175.1	chr16	5817709	5825256	125	84	115	108
717705	chr8	35646020	35651234	AC012215.1	chr8	35641246	35645768	217	187	244	216
401943	chr2	236475721	236491563	AC012305.1	chr2	236046064	236053090	10	15	12	12.3333
401943	chr2	236475721	236491563	AC012305.1	chr2	236472548	236474278	45	74	46	55
401943	chr2	236475721	236491563	AC012305.1	chr2	236651498	236659913	10	15	8	11
359115	chr2	96867770	96885100	AC012307.3	chr2	96859148	96866717	188	119	91	132.667
328023	chr19	37726761	37730425	AC012309.4	chr19	37732589	37734108	1056	512	328	632
331132	chr19	54703387	54706732	AC012314.20	chr19	55170979	55180566	4	8	3	5
331118	chr19	54622003	54643157	AC012314.8	chr19	54647786	54653910	181	315	128	208
322526	chr19	14590371	14603445	AC012318.1	chr19	14531268	14540173	15	19	14	16
345003	chr2	45147796	45150147	AC012354.1	chr2	44258749	44278283	19	16	10	15
345003	chr2	45147796	45150147	AC012354.1	chr2	44522734	44522910	17	14	10	13.6667
345003	chr2	45147796	45150147	AC012354.1	chr2	44704109	44706618	36	46	25	35.6667
345003	chr2	45147796	45150147	AC012354.1	chr2	45139317	45154392	499	451	670	540
348241	chr2	55504703	55510852	AC012358.1	chr2	55495767	55495937	415	231	281	309
348218	chr2	55435744	55447208	AC012358.7	chr2	55449358	55452899	225	121	135	160.333
348249	chr2	55534347	55538238	AC012358.8	chr2	55530837	55532157	519	265	266	350
361711	chr2	105988215	105992684	AC012360.6	chr2	105995298	105996296	546	546	470	520.667
361711	chr2	105988215	105992684	AC012360.6	chr2	106133073	106137990	262	274	178	238
361711	chr2	105988215	105992684	AC012360.6	chr2	106695277	106701234	11	6	8	8.33333
366091	chr2	120972997	120976985	AC012363.4	chr2	120978858	120980397	659	478	344	493.667
335215	chr2	11862104	11866370	AC012456.3	chr2	11854706	11860801	594	767	362	574.333
335217	chr2	11885173	11887693	AC012456.4	chr2	11613579	11624002	20	13	9	14
335217	chr2	11885173	11887693	AC012456.4	chr2	11893967	11903906	229	192	136	185.667
335217	chr2	11885173	11887693	AC012456.4	chr2	12320091	12328930	10	11	4	8.33333
335217	chr2	11885173	11887693	AC012456.4	chr2	12844247	12864091	9	11	6	8.66667
339270	chr2	25420261	25430720	AC012457.2	chr2	25196087	25207941	51	84	71	68.6667
402654	chr2	239206977	239210547	AC012485.2	chr2	239217775	239222941	391	276	256	307.667
402654	chr2	239206977	239210547	AC012485.2	chr2	239890126	239904376	10	6	5	7
384130	chr2	178560531	178566375	AC012499.1	chr2	178567346	178567842	143	136	140	139.667
400782	chr2	231772014	231777477	AC012507.4	chr2	231762018	231780691	305	311	181	265.667
396458	chr2	217122614	217126407	AC012513.6	chr2	217119946	217121974	463	358	274	365
396458	chr2	217122614	217126407	AC012513.6	chr2	217990685	218007427	6	5	4	5
381876	chr2	171206926	171209245	AC012594.1	chr2	171202707	171214319	409	284	222	305
381876	chr2	171206926	171209245	AC012594.1	chr2	171664027	171683603	61	36	61	52.6667
263259	chr16	19603119	19613126	AC012621.1	chr16	19600937	19602433	484	401	410	431.667
263259	chr16	19603119	19613126	AC012621.1	chr16	19882309	19901112	109	78	39	75.3333
263259	chr16	19603119	19613126	AC012621.1	chr16	20394389	20403851	17	25	10	17.3333
390480	chr2	198059736	198063912	AC013264.2	chr2	198056474	198067200	307	138	221	222
365887	chr2	120233357	120234537	AC013275.2	chr2	119774102	119780029	7	17	19	14.3333
171846	chr12	98997010	99001205	AC013283.1	chr12	98804847	98821614	3	9	8	6.66667
171846	chr12	98997010	99001205	AC013283.1	chr12	98990932	98996949	236	122	141	166.333
674837	chr7	44812016	44830988	AC013436.6	chr7	44808380	44811973	250	238	125	204.333
372928	chr2	143761781	143765376	AC013444.1	chr2	142918566	142932383	4	3	4	3.66667
372928	chr2	143761781	143765376	AC013444.1	chr2	143424711	143436971	26	22	9	19
372928	chr2	143761781	143765376	AC013444.1	chr2	143758205	143771246	476	89	162	242.333
382707	chr2	173934854	173949207	AC013461.1	chr2	174068399	174069252	44	31	23	32.6667
388056	chr2	190640564	190644188	AC013468.1	chr2	190622233	190623817	156	88	90	111.333
388056	chr2	190640564	190644188	AC013468.1	chr2	190924848	190939750	37	15	29	27
339709	chr2	27231056	27232697	AC013472.4	chr2	27214154	27220123	247	174	139	186.667
344158	chr2	42181346	42185198	AC013480.1	chr2	42167996	42179539	194	130	100	141.333
344179	chr2	42250839	42255725	AC013480.2	chr2	42249287	42263463	976	378	819	724.333
360392	chr2	101744828	101752846	AC013722.1	chr2	101742566	101742873	335	244	272	283.667
377864	chr2	158710443	158713813	AC013731.1	chr2	158172396	158177589	10	5	6	7
377864	chr2	158710443	158713813	AC013731.1	chr2	158695938	158704803	530	200	147	292.333
732884	chr8	87669585	87678149	AC013751.1	chr8	87665437	87666490	61	54	57	57.3333
102840	chr11	2878924	2889769	AC013791.10	chr11	2558431	2573010	61	31	34	42
102840	chr11	2878924	2889769	AC013791.10	chr11	2894689	2895792	264	282	208	251.333
747948	chr8	135604197	135611914	AC015599.1	chr8	135065178	135070519	22	22	10	18
747948	chr8	135604197	135611914	AC015599.1	chr8	135601384	135603659	352	255	333	313.333
258387	chr15	100888624	100891243	AC015723.1	chr15	100891547	100894783	13	11	24	16
296708	chr17	75877699	75889984	AC015804.1	chr17	75527983	75544903	15	22	18	18.3333
252628	chr15	80214950	80219292	AC015871.2	chr15	80208110	80209567	32	15	21	22.6667
280957	chr17	10783608	10791885	AC015908.1	chr17	10771852	10778108	286	343	109	246
280957	chr17	10783608	10791885	AC015908.1	chr17	11041662	11048380	40	51	21	37.3333
280957	chr17	10783608	10791885	AC015908.1	chr17	11834837	11852389	23	21	7	17
293056	chr17	61491614	61491812	AC015923.1	chr17	60737999	60748337	39	75	36	50
293056	chr17	61491614	61491812	AC015923.1	chr17	61155878	61165653	140	83	98	107
293056	chr17	61491614	61491812	AC015923.1	chr17	61488373	61495893	531	593	751	625
304285	chr18	25531042	25538289	AC015933.2	chr18	25544434	25548999	56	21	30	35.6667
288144	chr17	42979068	42995720	AC015936.3	chr17	42998383	43008330	242	336	142	240
339641	chr2	26893511	26897707	AC015977.6	chr2	26890850	26892695	76	116	86	92.6667
700848	chr7	135611431	135613304	AC015987.1	chr7	135358168	135368790	15	15	9	13
700848	chr7	135611431	135613304	AC015987.1	chr7	135606759	135614105	659	402	216	425.667
315218	chr18	60488852	60513017	AC015989.1	chr18	60518272	60519195	151	108	50	103
722218	chr8	53949717	53958099	AC016113.1	chr8	53944134	53944817	175	135	145	151.667
296830	chr17	76488337	76495298	AC016182.1	chr17	76485435	76485674	118	186	174	159.333
729422	chr8	76696203	76703622	AC016194.1	chr8	76709761	76713993	127	99	98	108
257134	chr15	96830894	96831899	AC016251.1	chr15	96824787	96833719	514	185	322	340.333
278915	chr17	1075669	1094570	AC016292.1	chr17	1095770	1096852	133	99	85	105.667
744434	chr8	123849078	123876494	AC016405.1	chr8	123882359	123890236	72	75	30	59
559119	chr5	13170732	13175258	AC016553.1	chr5	13162928	13166194	174	132	112	139.333
559619	chr5	14906479	14911874	AC016575.1	chr5	14732777	14752593	30	27	21	26
320931	chr19	4032971	4043411	AC016586.1	chr19	4044767	4045550	53	79	38	56.6667
572253	chr5	56231243	56241729	AC016644.1	chr5	55264255	55271964	8	4	3	5
572253	chr5	56231243	56241729	AC016644.1	chr5	56224650	56229898	265	201	119	195
355706	chr2	80470450	80474263	AC016670.1	chr2	80474394	80479191	403	280	366	349.667
363916	chr2	113922865	113938924	AC016683.5	chr2	113896064	113913602	28	33	46	35.6667
363918	chr2	113959161	113969848	AC016683.6	chr2	113975079	113977017	257	246	189	230.667
342928	chr2	38262015	38264301	AC016689.1	chr2	38272822	38280500	120	126	100	115.333
342928	chr2	38262015	38264301	AC016689.1	chr2	38496461	38507010	48	25	35	36
393750	chr2	209118065	209122124	AC016697.3	chr2	208625528	208641641	7	10	8	8.33333
393750	chr2	209118065	209122124	AC016697.3	chr2	209110019	209129298	320	132	193	215
372702	chr2	143069651	143072487	AC016706.1	chr2	143064529	143068550	293	238	244	258.333
355641	chr2	80254559	80259712	AC016716.2	chr2	80260864	80261086	468	371	409	416
345546	chr2	47036996	47044895	AC016722.1	chr2	46678281	46684492	3	4	4	3.66667
345553	chr2	47078934	47085466	AC016722.3	chr2	46251711	46270708	7	12	6	8.33333
345553	chr2	47078934	47085466	AC016722.3	chr2	46905547	46908501	64	41	30	45
345553	chr2	47078934	47085466	AC016722.3	chr2	47087848	47088197	600	266	493	453
381112	chr2	168797156	168798978	AC016723.4	chr2	167404293	167409593	8	11	3	7.33333
381112	chr2	168797156	168798978	AC016723.4	chr2	168793657	168796585	427	409	195	343.667
365833	chr2	120001588	120012611	AC016736.2	chr2	119777286	119782570	12	15	7	11.3333
365833	chr2	120001588	120012611	AC016736.2	chr2	120012702	120016839	104	105	65	91.3333
360346	chr2	101593126	101596772	AC016738.3	chr2	101220825	101237539	50	60	42	50.6667
360346	chr2	101593126	101596772	AC016738.3	chr2	101335949	101347599	99	57	54	70
383547	chr2	176753831	176772031	AC016751.3	chr2	176748921	176751680	66	69	48	61
402642	chr2	239134204	239140787	AC016757.3	chr2	239123968	239133132	432	402	311	381.667
366294	chr2	121791158	121792988	AC016764.1	chr2	121783120	121789585	297	339	229	288.333
366294	chr2	121791158	121792988	AC016764.1	chr2	122094035	122110193	15	16	13	14.6667
84141	chr10	71123308	71123624	AC016821.1	chr10	71121843	71122588	770	669	531	656.667
340543	chr2	30272929	30289656	AC016907.1	chr2	30267614	30272791	50	51	29	43.3333
340567	chr2	30360487	30371449	AC016907.3	chr2	29453489	29466610	11	8	7	8.66667
340567	chr2	30360487	30371449	AC016907.3	chr2	30147858	30156971	19	9	6	11.3333
340567	chr2	30360487	30371449	AC016907.3	chr2	30354228	30358167	674	290	384	449.333
340567	chr2	30360487	30371449	AC016907.3	chr2	30908617	30911340	14	13	8	11.6667
340567	chr2	30360487	30371449	AC016907.3	chr2	31535521	31553100	14	10	7	10.3333
340567	chr2	30360487	30371449	AC016907.3	chr2	31742524	31758298	8	5	7	6.66667
369677	chr2	133668372	133676225	AC016909.1	chr2	133666107	133668357	238	152	174	188
373216	chr2	144693938	144696604	AC016910.1	chr2	144691190	144702317	916	690	200	602
373216	chr2	144693938	144696604	AC016910.1	chr2	145096712	145114119	27	30	20	25.6667
362101	chr2	107450623	107450921	AC016994.2	chr2	107445050	107448934	540	485	398	474.333
345328	chr2	46304451	46309557	AC017006.2	chr2	46310912	46311543	754	506	402	554
345328	chr2	46304451	46309557	AC017006.2	chr2	46587583	46595456	64	48	35	49
345348	chr2	46389475	46395336	AC017006.3	chr2	46381656	46400559	241	233	242	238.667
402862	chr2	240081688	240090513	AC017028.1	chr2	240074944	240076479	676	570	399	548.333
402862	chr2	240081688	240090513	AC017028.1	chr2	240927592	240936603	41	50	17	36
352276	chr2	68499363	68503707	AC017083.2	chr2	68493845	68510110	563	313	359	411.667
352265	chr2	68458547	68461186	AC017083.3	chr2	68461489	68462288	286	119	188	197.667
352865	chr2	70678061	70686539	AC017084.1	chr2	70687532	70690404	895	751	586	744
400909	chr2	232316580	232318550	AC017104.2	chr2	232087517	232091108	139	143	77	119.667
400909	chr2	232316580	232318550	AC017104.2	chr2	232321430	232332442	271	214	779	421.333
479226	chr3	142882975	142887640	AC018450.1	chr3	142875430	142893733	619	318	339	425.333
479226	chr3	142882975	142887640	AC018450.1	chr3	143561703	143563702	22	6	7	11.6667
239155	chr15	33249877	33256595	AC018515.1	chr15	32949843	32955812	84	68	78	76.6667
266914	chr16	34679928	34683109	AC018558.1	chr16	34671804	34675019	243	180	160	194.333
292694	chr17	60089008	60102448	AC018628.1	chr17	60077580	60079028	176	133	110	139.667
699535	chr7	131010766	131014763	AC018642.1	chr7	130789769	130793407	91	65	61	72.3333
699535	chr7	131010766	131014763	AC018642.1	chr7	131003994	131023103	280	198	181	219.667
699794	chr7	131943941	131947790	AC018643.4	chr7	131948310	131948704	66	69	61	65.3333
374302	chr2	147889185	147892764	AC018678.1	chr2	147881445	147887507	215	282	297	264.667
374302	chr2	147889185	147892764	AC018678.1	chr2	148659291	148666886	10	13	12	11.6667
345424	chr2	46655549	46657113	AC018682.6	chr2	46251711	46255911	29	28	18	25
345424	chr2	46655549	46657113	AC018682.6	chr2	46667091	46667527	158	120	92	123.333
359967	chr2	100113943	100156231	AC018690.1	chr2	100160335	100161102	143	86	46	91.6667
359967	chr2	100113943	100156231	AC018690.1	chr2	100878214	100885984	19	24	3	15.3333
676445	chr7	50592159	50601327	AC018705.5	chr7	50601846	50607262	8	4	10	7.33333
361565	chr2	105466818	105475583	AC018730.1	chr2	104574279	104580063	6	11	7	8
361565	chr2	105466818	105475583	AC018730.1	chr2	105053014	105070029	28	29	17	24.6667
361565	chr2	105466818	105475583	AC018730.1	chr2	105479249	105482953	99	107	93	99.6667
330583	chr19	52089926	52098767	AC018755.11	chr19	52084972	52089281	551	369	613	511
438393	chr3	4922743	4934001	AC018816.3	chr3	4937141	4937511	172	143	130	148.333
387032	chr2	187359727	187364693	AC018867.1	chr2	187366424	187367453	539	270	342	383.667
387032	chr2	187359727	187364693	AC018867.1	chr2	187497184	187514258	114	53	92	86.3333
387032	chr2	187359727	187364693	AC018867.1	chr2	187710452	187722434	25	12	7	14.6667
387032	chr2	187359727	187364693	AC018867.1	chr2	188303127	188317802	19	12	6	12.3333
361926	chr2	106795423	106796052	AC018878.3	chr2	105955440	105970078	5	8	14	9
361926	chr2	106795423	106796052	AC018878.3	chr2	106191318	106199429	10	14	8	10.6667
361926	chr2	106795423	106796052	AC018878.3	chr2	106787211	106800312	503	411	349	421
333985	chr2	7217303	7221612	AC019048.1	chr2	7034039	7034941	24	29	27	26.6667
333985	chr2	7217303	7221612	AC019048.1	chr2	7209897	7214782	313	189	227	243
333985	chr2	7217303	7221612	AC019048.1	chr2	7549526	7557120	5	6	10	7
397577	chr2	221323838	221341887	AC019051.1	chr2	221321127	221321560	164	168	170	167.333
675603	chr7	47800071	47804453	AC019066.3	chr7	47806336	47817585	283	230	230	247.667
362535	chr2	108833744	108836074	AC019100.3	chr2	108842528	108844130	429	352	245	342
526103	chr4	99846712	99851952	AC019131.1	chr4	99267673	99285411	12	12	12	12
526103	chr4	99846712	99851952	AC019131.1	chr4	99575157	99585871	25	18	21	21.3333
526103	chr4	99846712	99851952	AC019131.1	chr4	99843218	99845607	524	339	276	379.667
380114	chr2	165693725	165698989	AC019181.2	chr2	165688788	165693150	152	118	99	123
377739	chr2	158296257	158299768	AC019201.1	chr2	157295335	157314985	17	10	4	10.3333
377739	chr2	158296257	158299768	AC019201.1	chr2	158173219	158188249	67	37	72	58.6667
377739	chr2	158296257	158299768	AC019201.1	chr2	158290931	158292036	482	295	261	346
377739	chr2	158296257	158299768	AC019201.1	chr2	158862440	158874407	12	15	21	16
287489	chr17	39649147	39660161	AC019349.5	chr17	39064987	39072965	14	14	11	13
287489	chr17	39649147	39660161	AC019349.5	chr17	39660237	39664326	81	58	71	70
341543	chr2	33788111	33788883	AC020594.5	chr2	32856670	32858548	12	12	15	13
341543	chr2	33788111	33788883	AC020594.5	chr2	33789587	33790647	766	394	500	553.333
443967	chr3	23808200	23812125	AC020626.1	chr3	23669923	23679151	35	30	31	32
443967	chr3	23808200	23812125	AC020626.1	chr3	23816719	23833516	143	190	203	178.667
481794	chr3	150635201	150636310	AC020636.1	chr3	149918641	149938592	8	7	7	7.33333
481794	chr3	150635201	150636310	AC020636.1	chr3	150637479	150643439	941	732	827	833.333
543852	chr4	154792622	154798776	AC020703.1	chr4	154799013	154812092	437	272	189	299.333
676327	chr7	50175558	50188164	AC020743.2	chr7	50739465	50746266	22	20	10	17.3333
273813	chr16	70779902	70791759	AC020763.1	chr16	70794120	70795672	452	514	355	440.333
273813	chr16	70779902	70791759	AC020763.1	chr16	71314629	71316754	11	14	10	11.6667
584894	chr5	95919184	95927048	AC020900.1	chr5	95928967	95936473	172	80	121	124.333
327591	chr19	35590055	35605734	AC020907.1	chr19	35607355	35607797	253	303	242	266
331331	chr19	55892329	55898826	AC020922.1	chr19	55900438	55904871	623	522	353	499.333
157136	chr12	52641149	52659404	AC021066.1	chr12	52665279	52665687	198	232	172	200.667
601303	chr5	148978642	148996459	AC021078.1	chr5	149233835	149249865	34	37	15	28.6667
601303	chr5	148978642	148996459	AC021078.1	chr5	149360139	149363218	26	12	18	18.6667
359137	chr2	96986565	96990459	AC021188.4	chr2	97002287	97008828	438	289	261	329.333
359137	chr2	96986565	96990459	AC021188.4	chr2	97178020	97180783	66	76	39	60.3333
706512	chr7	155755323	155756273	AC021218.2	chr7	155757904	155762187	305	306	288	299.667
296762	chr17	76103774	76107152	AC021593.1	chr17	76109671	76109909	423	363	344	376.667
114242	chr11	39881609	39884051	AC021749.1	chr11	39871850	39877464	31	99	39	56.3333
249936	chr15	70069866	70077900	AC021818.1	chr15	70079155	70089345	25	25	56	35.3333
72602	chr10	28596640	28600773	AC022021.1	chr10	28601051	28606107	518	398	280	398.667
604808	chr5	160656676	160657354	AC022120.1	chr5	160658183	160660551	180	168	190	179.333
585597	chr5	97974926	97975107	AC022142.1	chr5	96597276	96608307	8	11	6	8.33333
585597	chr5	97974926	97975107	AC022142.1	chr5	97277276	97295230	20	14	15	16.3333
585597	chr5	97974926	97975107	AC022142.1	chr5	97402726	97410860	21	8	11	13.3333
585597	chr5	97974926	97975107	AC022142.1	chr5	97969768	97970026	542	484	355	460.333
328088	chr19	38028682	38042885	AC022148.1	chr19	38024565	38028144	136	189	112	145.667
701523	chr7	137636045	137645086	AC022173.2	chr7	137336796	137347953	7	6	7	6.66667
701523	chr7	137636045	137645086	AC022173.2	chr7	137633112	137634388	233	109	293	211.667
322186	chr19	12162841	12171530	AC022415.4	chr19	11904541	11913139	14	15	15	14.6667
322186	chr19	12162841	12171530	AC022415.4	chr19	11993788	11995107	27	14	12	17.6667
322186	chr19	12162841	12171530	AC022415.4	chr19	12155576	12157059	143	125	109	125.667
322205	chr19	12262669	12269340	AC022415.5	chr19	11904541	11913139	19	27	15	20.3333
322205	chr19	12262669	12269340	AC022415.5	chr19	11993788	11995107	18	14	15	15.6667
322205	chr19	12262669	12269340	AC022415.5	chr19	12256018	12256716	203	147	141	163.667
572142	chr5	55901742	55902125	AC022431.2	chr5	55897503	55906099	644	484	711	613
493457	chr3	187889620	187901214	AC022498.1	chr3	187889169	187905249	205	157	396	252.667
493457	chr3	187889620	187901214	AC022498.1	chr3	188675008	188685219	9	14	4	9
84386	chr10	72191639	72194631	AC022532.1	chr10	71981769	71991897	33	31	19	27.6667
84386	chr10	72191639	72194631	AC022532.1	chr10	72177477	72187353	402	392	338	377.333
84386	chr10	72191639	72194631	AC022532.1	chr10	72519986	72533131	23	32	20	25
83094	chr10	67465854	67473870	AC022538.1	chr10	67477021	67485577	127	77	171	125
250599	chr15	72339044	72344992	AC022872.1	chr15	72333323	72337095	297	206	251	251.333
258642	chr15	101816805	101818647	AC023024.1	chr15	101561702	101579982	34	52	34	40
258642	chr15	101816805	101818647	AC023024.1	chr15	101813811	101815534	639	477	344	486.667
258642	chr15	101816805	101818647	AC023024.1	chr15	102179537	102181816	72	54	59	61.6667
151332	chr12	32052599	32069592	AC023050.1	chr12	32070817	32071580	170	191	95	152
724625	chr8	61604423	61604944	AC023102.1	chr8	61607414	61610707	456	200	441	365.667
710112	chr8	9944105	9953342	AC023385.1	chr8	9954730	9955535	631	363	398	464
375670	chr2	151904591	151906592	AC023469.1	chr2	151340168	151349437	20	13	5	12.6667
375670	chr2	151904591	151906592	AC023469.1	chr2	151457193	151463486	10	18	8	12
375670	chr2	151904591	151906592	AC023469.1	chr2	151537245	151543982	24	9	8	13.6667
375670	chr2	151904591	151906592	AC023469.1	chr2	151770415	151771711	23	27	12	20.6667
375670	chr2	151904591	151906592	AC023469.1	chr2	151899826	151904209	248	128	126	167.333
375640	chr2	151836635	151846615	AC023469.2	chr2	151829861	151835553	222	78	144	148
154376	chr12	42465506	42487837	AC023513.1	chr12	41348693	41359549	2	2	2	2
154376	chr12	42465506	42487837	AC023513.1	chr12	41665595	41666846	10	7	5	7.33333
742924	chr8	119292651	119294751	AC023590.1	chr8	118536288	118543484	7	5	7	6.33333
742924	chr8	119292651	119294751	AC023590.1	chr8	118899145	118907256	39	28	15	27.3333
742924	chr8	119292651	119294751	AC023590.1	chr8	119297654	119298885	765	565	493	607.667
474737	chr3	127381579	127388663	AC023593.1	chr3	127375071	127377633	360	397	424	393.667
474737	chr3	127381579	127388663	AC023593.1	chr3	127678848	127688403	33	50	27	36.6667
496054	chr3	196359104	196362168	AC023797.1	chr3	196070007	196072891	11	7	11	9.66667
496054	chr3	196359104	196362168	AC023797.1	chr3	196351848	196356134	324	229	208	253.667
443378	chr3	21871007	21871666	AC023798.1	chr3	21873390	21884494	145	242	218	201.667
267666	chr16	48438126	48458019	AC023818.1	chr16	48427942	48428546	66	84	39	63
267666	chr16	48438126	48458019	AC023818.1	chr16	48561564	48575348	17	19	12	16
438019	chr3	3684100	3692160	AC024158.1	chr3	3694764	3697285	494	335	284	371
438019	chr3	3684100	3692160	AC024158.1	chr3	4321998	4328364	12	13	9	11.3333
438276	chr3	4529815	4535454	AC024168.2	chr3	3660948	3677096	2	2	3	2.33333
438276	chr3	4529815	4535454	AC024168.2	chr3	4523503	4540592	369	319	349	345.667
529987	chr4	111774326	111779159	AC024198.1	chr4	111781077	111783513	283	190	189	220.667
706125	chr7	154401097	154403856	AC024239.1	chr7	154404307	154406121	195	193	179	189
253577	chr15	83875407	83891067	AC024270.1	chr15	83869291	83870248	139	92	72	101
578945	chr5	77347429	77357513	AC024568.1	chr5	76839878	76856251	11	11	16	12.6667
578945	chr5	77347429	77357513	AC024568.1	chr5	77357951	77358423	287	215	198	233.333
285696	chr17	32191778	32206026	AC024610.1	chr17	32178239	32189016	71	77	31	59.6667
151202	chr12	31476368	31479637	AC024940.1	chr12	31467990	31473143	378	245	404	342.333
151202	chr12	31476368	31479637	AC024940.1	chr12	31762290	31780127	28	16	7	17
275194	chr16	75731697	75740650	AC025287.1	chr16	75741413	75741737	43	12	30	28.3333
565207	chr5	33277548	33284831	AC025472.1	chr5	32706321	32716569	12	12	8	10.6667
565207	chr5	33277548	33284831	AC025472.1	chr5	33287852	33290323	259	144	185	196
453107	chr3	55685417	55693139	AC025572.1	chr3	55670675	55674074	117	122	87	108.667
453107	chr3	55685417	55693139	AC025572.1	chr3	56277197	56290163	9	6	6	7
160569	chr12	64495191	64497303	AC025576.1	chr12	64493509	64501556	362	230	184	258.667
246900	chr15	59179669	59185922	AC025918.2	chr15	58516227	58525781	20	19	14	17.6667
246900	chr15	59179669	59185922	AC025918.2	chr15	59186625	59187545	483	245	339	355.667
438481	chr3	5228182	5235779	AC026202.3	chr3	4755909	4763161	10	15	12	12.3333
438481	chr3	5228182	5235779	AC026202.3	chr3	5494235	5502096	11	6	7	8
151673	chr12	33194147	33213965	AC026357.1	chr12	33189243	33194066	198	163	121	160.667
177155	chr12	118602196	118606398	AC026366.1	chr12	118598459	118612105	21	10	27	19.3333
270835	chr16	59765131	59768934	AC026457.1	chr16	59759569	59760299	207	187	156	183.333
581301	chr5	84823412	84825128	AC026700.1	chr5	84817729	84821570	281	136	202	206.333
556398	chr5	4297737	4306828	AC026711.1	chr5	4290626	4296598	337	266	154	252.333
583602	chr5	92051477	92053230	AC026781.1	chr5	92047177	92050654	148	39	108	98.3333
556981	chr5	6111603	6119622	AC026797.1	chr5	6121433	6122239	134	130	111	125
565711	chr5	34793158	34802761	AC026801.2	chr5	34790113	34809856	312	376	250	312.667
565711	chr5	34793158	34802761	AC026801.2	chr5	35171761	35188504	5	5	3	4.33333
330163	chr19	49417733	49426104	AC026803.14	chr19	49408950	49417671	167	266	135	189.333
459584	chr3	76466794	76471364	AC026877.1	chr3	76472310	76478598	91	70	90	83.6667
253171	chr15	82335167	82338934	AC026956.1	chr15	82229707	82245060	55	41	32	42.6667
253171	chr15	82335167	82338934	AC026956.1	chr15	82323796	82324699	194	209	138	180.333
280717	chr17	9720720	9726801	AC027045.1	chr17	9728912	9733674	10	7	21	12.6667
743887	chr8	122195647	122200017	AC027238.1	chr8	122200980	122202362	523	231	329	361
743887	chr8	122195647	122200017	AC027238.1	chr8	122624502	122635156	13	7	10	10
273841	chr16	70905383	70907438	AC027281.1	chr16	70907620	70909505	952	788	657	799
280141	chr17	6907157	6920155	AC027763.2	chr17	6905755	6906113	172	107	135	138
253815	chr15	84652681	84659759	AC027807.1	chr15	84647930	84664636	233	177	243	217.667
525642	chr4	98402897	98412896	AC034154.1	chr4	98415246	98415433	395	312	351	352.667
601753	chr5	150747876	150751086	AC034205.1	chr5	150739673	150745061	313	205	286	268
601753	chr5	150747876	150751086	AC034205.1	chr5	150991661	150998791	26	31	25	27.3333
596241	chr5	131346228	131348836	AC034228.2	chr5	130766034	130773407	9	11	16	12
596241	chr5	131346228	131348836	AC034228.2	chr5	131036213	131046602	23	19	19	20.3333
596239	chr5	131338044	131341756	AC034228.3	chr5	130766034	130772465	17	5	12	11.3333
596239	chr5	131338044	131341756	AC034228.3	chr5	130922554	130928481	54	33	35	40.6667
596239	chr5	131338044	131341756	AC034228.3	chr5	131039943	131050401	30	28	31	29.6667
596239	chr5	131338044	131341756	AC034228.3	chr5	131336834	131337290	426	549	440	471.667
596214	chr5	131268217	131282809	AC034228.4	chr5	131260604	131265850	176	122	135	144.333
591099	chr5	115378790	115379689	AC034236.1	chr5	114637936	114648232	10	13	3	8.66667
591099	chr5	115378790	115379689	AC034236.1	chr5	115372005	115388520	244	162	200	202
598088	chr5	138085055	138091406	AC034243.1	chr5	138612209	138622815	18	20	7	15
302299	chr18	18635617	18642649	AC036178.1	chr18	18643550	18643728	915	541	642	699.333
292982	chr17	61274653	61275321	AC037445.1	chr17	61275342	61278380	659	342	404	468.333
292982	chr17	61274653	61275321	AC037445.1	chr17	61452850	61461016	51	49	49	49.6667
292982	chr17	61274653	61275321	AC037445.1	chr17	61700955	61713427	10	9	12	10.3333
273211	chr16	67911016	67912047	AC040162.1	chr16	67916071	67917947	623	889	490	667.333
270739	chr16	59446558	59448694	AC040163.1	chr16	59444585	59460740	95	105	119	106.333
495562	chr3	194303099	194309010	AC046143.5	chr3	194206600	194212758	53	56	17	42
495562	chr3	194303099	194309010	AC046143.5	chr3	194315567	194317209	176	80	115	123.667
723141	chr8	56948717	56962004	AC046176.1	chr8	56708796	56719846	39	33	34	35.3333
723141	chr8	56948717	56962004	AC046176.1	chr8	56966771	56977211	354	117	83	184.667
723141	chr8	56948717	56962004	AC046176.1	chr8	57474739	57488945	6	3	6	5
478432	chr3	140208298	140209898	AC048346.1	chr3	139186293	139192956	3	3	4	3.33333
478432	chr3	140208298	140209898	AC048346.1	chr3	140212980	140215196	163	159	114	145.333
478432	chr3	140208298	140209898	AC048346.1	chr3	140549305	140562881	6	9	6	7
714052	chr8	23424387	23432475	AC051642.1	chr8	23421952	23436385	289	214	496	333
714052	chr8	23424387	23432475	AC051642.1	chr8	24260899	24279369	12	16	10	12.6667
102687	chr11	2005194	2023179	AC051649.7	chr11	1719887	1732023	21	35	18	24.6667
397295	chr2	220285999	220296217	AC053503.6	chr2	220281350	220282393	531	507	377	471.667
533797	chr4	123537947	123541498	AC053545.3	chr4	122822358	122838929	4	12	4	6.66667
533797	chr4	123537947	123541498	AC053545.3	chr4	123531733	123537856	358	266	450	358
480172	chr3	145614897	145620836	AC055758.1	chr3	145609970	145624813	254	220	200	224.667
496367	chr3	197556482	197564315	AC055764.1	chr3	197549761	197569420	222	197	244	221
287919	chr17	41825537	41827515	AC055813.1	chr17	41829311	41830174	624	730	586	646.667
257376	chr15	97632988	97635929	AC055873.1	chr15	97629146	97637603	244	158	162	188
257376	chr15	97632988	97635929	AC055873.1	chr15	98266224	98280086	5	7	3	5
538556	chr4	138149141	138151594	AC060835.1	chr4	138153750	138169559	6	4	10	6.66667
376842	chr2	155538447	155554993	AC061961.2	chr2	155556747	155558879	38	44	27	36.3333
296800	chr17	76309328	76312541	AC061992.2	chr17	76301432	76307691	121	215	118	151.333
296800	chr17	76309328	76312541	AC061992.2	chr17	76745881	76762218	5	10	4	6.33333
402899	chr2	240319726	240332218	AC062017.1	chr2	240332601	240335578	194	176	147	172.333
402899	chr2	240319726	240332218	AC062017.1	chr2	240920605	240927591	33	29	23	28.3333
468478	chr3	107081833	107093293	AC063944.1	chr3	107100022	107103084	254	161	142	185.667
169924	chr12	92814194	92815377	AC063949.1	chr12	91772179	91776058	7	7	6	6.66667
596281	chr5	131516144	131526401	AC063976.4	chr5	131528268	131538370	200	268	104	190.667
330504	chr19	51666063	51674037	AC063977.1	chr19	51761256	51762745	73	32	29	44.6667
385885	chr2	183973141	183974244	AC064871.3	chr2	183974851	183979998	177	155	130	154
401989	chr2	236691274	236695891	AC064874.1	chr2	235459802	235479218	4	5	3	4
401989	chr2	236691274	236695891	AC064874.1	chr2	236698218	236700958	347	263	280	296.667
401989	chr2	236691274	236695891	AC064874.1	chr2	237077831	237084652	24	60	25	36.3333
401989	chr2	236691274	236695891	AC064874.1	chr2	237973253	237975967	9	8	10	9
364532	chr2	115913220	115921819	AC066593.1	chr2	115911580	115923060	201	135	270	202
494097	chr3	189856883	189862740	AC067718.1	chr3	190041366	190049080	16	11	18	15
494097	chr3	189856883	189862740	AC067718.1	chr3	190420272	190430657	5	4	5	4.66667
81983	chr10	63684545	63688453	AC067742.1	chr10	63674801	63677416	200	202	134	178.667
388463	chr2	191877639	191893225	AC067945.2	chr2	191894367	191896132	340	225	252	272.333
388463	chr2	191877639	191893225	AC067945.2	chr2	192525832	192539340	3	3	2	2.66667
344954	chr2	45009025	45016067	AC067957.1	chr2	44703066	44706618	10	13	14	12.3333
344954	chr2	45009025	45016067	AC067957.1	chr2	44774242	44784788	15	19	8	14
344954	chr2	45009025	45016067	AC067957.1	chr2	45017910	45021292	294	335	274	301
382342	chr2	172626475	172635456	AC068039.4	chr2	172637224	172640962	23	11	25	19.6667
382342	chr2	172626475	172635456	AC068039.4	chr2	172954154	172963112	18	31	13	20.6667
99947	chr10	125668607	125671456	AC068058.1	chr10	125671490	125673263	81	89	86	85.3333
381872	chr2	171196248	171202103	AC068280.1	chr2	171202707	171203692	331	186	198	238.333
381872	chr2	171196248	171202103	AC068280.1	chr2	171660220	171664226	52	36	24	37.3333
333079	chr2	4267389	4278492	AC068292.1	chr2	4265056	4266008	371	259	259	296.333
709626	chr8	8238661	8248628	AC068353.1	chr8	8233683	8237389	1155	951	769	958.333
709626	chr8	8238661	8248628	AC068353.1	chr8	8399759	8404912	99	103	68	90
709626	chr8	8238661	8248628	AC068353.1	chr8	8853653	8856216	31	41	18	30
320317	chr18	77421105	77447969	AC068473.1	chr18	77451114	77458928	115	109	53	92.3333
306561	chr18	32392811	32401125	AC068506.1	chr18	31693306	31707130	14	19	16	16.3333
306561	chr18	32392811	32401125	AC068506.1	chr18	31951305	31958083	18	9	5	10.6667
306561	chr18	32392811	32401125	AC068506.1	chr18	32387853	32406944	434	238	114	262
364436	chr2	115582385	115598189	AC068542.1	chr2	115575446	115576776	109	81	85	91.6667
746216	chr8	129821061	129833018	AC068570.1	chr8	129045753	129058102	9	11	5	8.33333
746216	chr8	129821061	129833018	AC068570.1	chr8	129834258	129839974	628	215	324	389
173309	chr12	103614315	103637450	AC068643.1	chr12	103608582	103611484	171	136	85	130.667
473287	chr3	122000412	122001729	AC068754.1	chr3	121822381	121830288	32	11	15	19.3333
473287	chr3	122000412	122001729	AC068754.1	chr3	122002155	122006749	394	287	267	316
144600	chr12	10653442	10658739	AC068775.1	chr12	10643583	10645256	43	14	26	27.6667
176945	chr12	117705814	117723821	AC068799.1	chr12	117726260	117727527	180	179	121	160
176945	chr12	117705814	117723821	AC068799.1	chr12	118270303	118275203	22	20	8	16.6667
255575	chr15	91477137	91484708	AC068831.3	chr15	91183351	91196098	33	43	17	31
255575	chr15	91477137	91484708	AC068831.3	chr15	91474708	91475551	436	395	298	376.333
255583	chr15	91509387	91510054	AC068831.8	chr15	91173521	91183350	17	19	9	15
255583	chr15	91509387	91510054	AC068831.8	chr15	91501551	91518812	526	570	545	547
255583	chr15	91509387	91510054	AC068831.8	chr15	91809071	91819324	55	32	45	44
482025	chr3	151349921	151356323	AC069067.1	chr3	151177824	151194439	55	28	21	34.6667
482025	chr3	151349921	151356323	AC069067.1	chr3	151345291	151349840	213	370	368	317
252377	chr15	79400377	79407603	AC069082.1	chr15	79397307	79416178	152	134	141	142.333
377951	chr2	159022782	159028219	AC069146.2	chr2	159018251	159031440	534	291	291	372
377951	chr2	159022782	159028219	AC069146.2	chr2	159597964	159604007	46	31	37	38
365898	chr2	120301141	120311680	AC069154.2	chr2	120289773	120298728	176	166	185	175.667
177854	chr12	121332211	121343846	AC069214.1	chr12	121345147	121348585	206	203	179	196
495931	chr3	195963352	195978341	AC069257.8	chr3	195960518	195962453	363	521	212	365.333
662368	chr7	3445945	3459460	AC069286.1	chr7	3444252	3460678	228	245	236	236.333
705095	chr7	150280112	150283829	AC069304.1	chr7	150148515	150162329	155	57	104	105.333
286345	chr17	34405627	34410796	AC069363.1	chr17	34303632	34306966	134	76	84	98
286345	chr17	34405627	34410796	AC069363.1	chr17	34401361	34404284	743	357	376	492
248615	chr15	65130647	65137299	AC069368.3	chr15	65128476	65129851	455	368	323	382
353798	chr2	74206925	74215413	AC073046.4	chr2	74194255	74195810	61	62	62	61.6667
397188	chr2	219793126	219799268	AC073128.10	chr2	219789857	219790817	215	133	218	188.667
694906	chr7	115967531	115969615	AC073130.3	chr7	115963752	115972872	728	530	298	518.667
401154	chr2	233449164	233457454	AC073254.1	chr2	233448211	233458628	321	331	203	285
401154	chr2	233449164	233457454	AC073254.1	chr2	233876254	233885650	6	6	11	7.66667
340639	chr2	30654269	30656625	AC073255.1	chr2	30646643	30653889	317	434	239	330
353832	chr2	74361314	74362538	AC073263.1	chr2	74352611	74366446	609	449	424	494
345612	chr2	47292124	47300128	AC073283.7	chr2	45989657	45992415	2	4	3	3
345612	chr2	47292124	47300128	AC073283.7	chr2	47512194	47531541	42	26	39	35.6667
666287	chr7	16755654	16766587	AC073333.8	chr7	16770673	16778664	53	25	36	38
702925	chr7	142977819	142989457	AC073342.12	chr7	142699607	142711814	9	12	15	12
702925	chr7	142977819	142989457	AC073342.12	chr7	142989567	142991185	294	248	202	248
663042	chr7	6713226	6713790	AC073343.1	chr7	6716755	6722092	1241	748	634	874.333
663042	chr7	6713226	6713790	AC073343.1	chr7	7483072	7492877	10	3	2	5
693863	chr7	112749478	112761357	AC073346.2	chr7	112763187	112765513	291	171	239	233.667
693863	chr7	112749478	112761357	AC073346.2	chr7	113054446	113064065	19	16	6	13.6667
693985	chr7	113090855	113091667	AC073348.1	chr7	112663486	112680458	14	16	11	13.6667
693985	chr7	113090855	113091667	AC073348.1	chr7	113089205	113094336	467	482	320	423
97734	chr10	117874268	117880882	AC073588.1	chr10	117870974	117885370	257	237	210	234.667
789572	chrX	16393742	16396904	AC073597.1	chrX	16391314	16391528	75	49	40	54.6667
789572	chrX	16393742	16396904	AC073597.1	chrX	16666920	16685095	6	7	2	5
156385	chr12	49349427	49359771	AC073610.1	chr12	49373704	49376486	153	151	111	138.333
296936	chr17	77021883	77025543	AC073624.1	chr17	77017137	77018704	600	667	362	543
296936	chr17	77021883	77025543	AC073624.1	chr17	77378304	77393682	31	49	30	36.6667
398675	chr2	224824290	224834357	AC073641.2	chr2	225143465	225157172	9	4	7	6.66667
698602	chr7	127289511	127298661	AC073934.6	chr7	127852479	127860533	23	25	13	20.3333
661961	chr7	1065596	1082452	AC073957.15	chr7	1084762	1087408	411	523	257	397
340130	chr2	28884399	28889659	AC074011.2	chr2	28881642	28894469	994	806	791	863.667
339846	chr2	27803057	27808708	AC074091.1	chr2	27798271	27798891	380	290	229	299.667
339877	chr2	27937293	27939466	AC074091.13	chr2	27929976	27946355	343	203	323	289.667
339877	chr2	27937293	27939466	AC074091.13	chr2	28486328	28504189	18	18	7	14.3333
339877	chr2	27937293	27939466	AC074091.13	chr2	28628493	28629652	18	31	18	22.3333
566793	chr5	38081824	38083520	AC074129.1	chr5	38080362	38085434	517	267	316	366.667
327872	chr19	37177995	37182425	AC074138.3	chr19	36891844	36910735	14	10	9	11
327872	chr19	37177995	37182425	AC074138.3	chr19	37165959	37175223	389	235	215	279.667
327872	chr19	37177995	37182425	AC074138.3	chr19	37708237	37726760	21	10	9	13.3333
329646	chr19	46234256	46237240	AC074212.3	chr19	46237393	46252024	184	293	153	210
86653	chr10	80502066	80511954	AC074323.1	chr10	79807299	79814147	11	22	9	14
343114	chr2	38898412	38909430	AC074366.3	chr2	38915796	38923920	156	108	65	109.667
662053	chr7	1725636	1738329	AC074389.6	chr7	1740465	1747974	306	489	272	355.667
662053	chr7	1725636	1738329	AC074389.6	chr7	2227615	2228230	17	36	23	25.3333
351565	chr2	66267516	66273866	AC074391.1	chr2	66264710	66277603	103	234	244	193.667
470362	chr3	112809412	112816861	AC078785.1	chr3	112803549	112806556	835	511	436	594
470362	chr3	112809412	112816861	AC078785.1	chr3	112998953	113007959	66	65	59	63.3333
473467	chr3	122644652	122651221	AC078794.1	chr3	122641894	122643664	356	326	276	319.333
173530	chr12	104371119	104380113	AC078819.2	chr12	104361086	104370716	212	151	126	163
371895	chr2	140576543	140584459	AC078851.1	chr2	140569969	140573539	37	19	29	28.3333
468812	chr3	108038255	108039759	AC078855.1	chr3	107649557	107663132	16	12	11	13
468812	chr3	108038255	108039759	AC078855.1	chr3	108040513	108043145	557	541	503	533.667
551532	chr4	178463156	178484989	AC078881.1	chr4	178486679	178487746	27	17	19	21
382540	chr2	173322334	173335974	AC078883.3	chr2	172648308	172660382	5	7	4	5.33333
382540	chr2	173322334	173335974	AC078883.3	chr2	173043506	173054364	40	27	35	34
382540	chr2	173322334	173335974	AC078883.3	chr2	173320118	173320682	462	333	312	369
165619	chr12	79740605	79743724	AC078917.1	chr12	78395935	78400827	11	20	6	12.3333
165619	chr12	79740605	79743724	AC078917.1	chr12	78545909	78562507	11	12	6	9.66667
165619	chr12	79740605	79743724	AC078917.1	chr12	79734916	79739975	264	191	254	236.333
488572	chr3	171524708	171529566	AC078953.1	chr3	170667346	170684837	3	8	2	4.33333
488572	chr3	171524708	171529566	AC078953.1	chr3	171529628	171532468	210	220	275	235
488572	chr3	171524708	171529566	AC078953.1	chr3	171849393	171859972	37	16	30	27.6667
789546	chrX	16314814	16317457	AC078993.1	chrX	16308722	16324238	143	93	88	108
789546	chrX	16314814	16317457	AC078993.1	chrX	16680761	16685095	14	7	7	9.33333
292355	chr17	58886757	58893300	AC079005.1	chr17	58894138	58900193	204	131	172	169
553577	chr4	185188446	185189692	AC079080.1	chr4	185197300	185200803	447	266	189	300.667
553577	chr4	185188446	185189692	AC079080.1	chr4	185555511	185557661	28	26	13	22.3333
727527	chr8	70739602	70747761	AC079089.1	chr8	70723602	70726445	152	143	120	138.333
282725	chr17	16978636	16983801	AC079111.1	chr17	16988246	16990532	321	361	218	300
354689	chr2	77208622	77216846	AC079117.1	chr2	77221599	77224909	166	109	110	128.333
398493	chr2	224263734	224266318	AC079120.1	chr2	224261125	224262453	186	122	158	155.333
402089	chr2	237072120	237077830	AC079135.1	chr2	236684094	236698192	32	53	35	40
402089	chr2	237072120	237077830	AC079135.1	chr2	236841809	236854270	18	21	9	16
402089	chr2	237072120	237077830	AC079135.1	chr2	237083864	237095013	170	155	235	186.667
367163	chr2	124782517	124786838	AC079154.1	chr2	124781520	124791415	304	273	239	272
399647	chr2	227987154	227989282	AC079235.1	chr2	227998096	228002687	121	126	97	114.667
399647	chr2	227987154	227989282	AC079235.1	chr2	228748405	228755005	6	8	3	5.66667
383979	chr2	178125221	178130928	AC079305.10	chr2	178132425	178134527	727	473	431	543.667
533539	chr4	122684930	122690839	AC079341.1	chr4	122392418	122404842	61	20	23	34.6667
533539	chr4	122684930	122690839	AC079341.1	chr4	122695601	122702670	323	273	182	259.333
391924	chr2	202934826	202940082	AC079354.1	chr2	202941183	202950556	184	119	287	196.667
391938	chr2	202980380	202985289	AC079354.3	chr2	202989826	202990008	603	398	363	454.667
346189	chr2	49285223	49292457	AC079394.1	chr2	49295409	49296529	228	211	76	171.667
575701	chr5	66758677	66760941	AC079467.1	chr5	66439572	66445865	12	13	7	10.6667
575701	chr5	66758677	66760941	AC079467.1	chr5	66750725	66764709	449	404	428	427
575701	chr5	66758677	66760941	AC079467.1	chr5	67546480	67553908	20	27	13	20
166800	chr12	83384835	83405777	AC079595.1	chr12	83089961	83097620	11	11	7	9.66667
166800	chr12	83384835	83405777	AC079595.1	chr12	83381703	83381904	260	170	115	181.667
154748	chr12	43683570	43685885	AC079603.1	chr12	43688991	43689899	270	201	220	230.333
402930	chr2	240498105	240505607	AC079612.1	chr2	240489044	240492650	297	301	228	275.333
363819	chr2	113594484	113606655	AC079753.1	chr2	113588495	113592712	363	399	330	364
332068	chr2	283104	287292	AC079779.4	chr2	274456	281360	442	197	247	295.333
332043	chr2	196807	199069	AC079779.7	chr2	193264	194543	206	204	161	190.333
375973	chr2	152951975	152959709	AC079790.2	chr2	152942869	152946610	327	214	119	220
375973	chr2	152951975	152959709	AC079790.2	chr2	153505446	153522955	16	7	4	9
685033	chr7	82975946	82984868	AC079799.2	chr7	82988136	82997004	148	46	69	87.6667
345866	chr2	48130849	48134742	AC079807.2	chr2	48127343	48129564	378	533	250	387
345866	chr2	48130849	48134742	AC079807.2	chr2	48326706	48328328	122	93	84	99.6667
345866	chr2	48130849	48134742	AC079807.2	chr2	48552842	48565118	34	20	19	24.3333
345866	chr2	48130849	48134742	AC079807.2	chr2	48647049	48653873	39	49	49	45.6667
397901	chr2	222383486	222389522	AC079834.1	chr2	221542656	221553493	18	20	9	15.6667
397901	chr2	222383486	222389522	AC079834.1	chr2	222377224	222396365	242	87	100	143
256471	chr15	94623753	94628327	AC080032.1	chr15	93883614	93900119	16	9	13	12.6667
256471	chr15	94623753	94628327	AC080032.1	chr15	94630701	94635390	661	391	320	457.333
295641	chr17	70708801	70720496	AC080037.1	chr17	70707427	70721412	234	174	133	180.333
295641	chr17	70708801	70720496	AC080037.1	chr17	71650900	71660483	3	2	3	2.66667
391521	chr2	201449367	201453446	AC080164.1	chr2	200834555	200849162	28	17	16	20.3333
391521	chr2	201449367	201453446	AC080164.1	chr2	201453805	201463014	661	461	400	507.333
166559	chr12	82730993	82739612	AC083811.1	chr12	82389024	82400724	6	5	4	5
166559	chr12	82730993	82739612	AC083811.1	chr12	82740038	82740268	52	24	31	35.6667
522659	chr4	89410331	89420622	AC083829.1	chr4	88970298	88986536	58	29	29	38.6667
522659	chr4	89410331	89420622	AC083829.1	chr4	89155453	89164290	64	37	43	48
522659	chr4	89410331	89420622	AC083829.1	chr4	89420731	89420884	563	425	401	463
672338	chr7	36118284	36120955	AC083864.4	chr7	36128234	36130242	100	147	90	112.333
700071	chr7	132945812	132952366	AC083875.1	chr7	132957355	132964693	251	106	94	150.333
700071	chr7	132945812	132952366	AC083875.1	chr7	133700978	133717675	5	3	3	3.66667
701905	chr7	139065368	139075747	AC083883.1	chr7	139077083	139077370	554	283	330	389
701905	chr7	139065368	139075747	AC083883.1	chr7	139727274	139735602	18	9	5	10.6667
701905	chr7	139065368	139075747	AC083883.1	chr7	140041921	140052529	5	9	2	5.33333
393663	chr2	208842013	208843327	AC083900.1	chr2	208625317	208628602	56	69	33	52.6667
393663	chr2	208842013	208843327	AC083900.1	chr2	208840304	208859383	246	209	536	330.333
393663	chr2	208842013	208843327	AC083900.1	chr2	209106349	209118064	13	10	8	10.3333
726383	chr8	67024487	67035306	AC084082.3	chr8	67016525	67017807	170	79	95	114.667
726383	chr8	67024487	67035306	AC084082.3	chr8	67332184	67336947	16	18	14	16
750347	chr8	145659910	145665922	AC084125.4	chr8	145674891	145676334	97	192	86	125
466658	chr3	101393991	101404832	AC084198.1	chr3	100440336	100451127	7	3	6	5.33333
466658	chr3	101393991	101404832	AC084198.1	chr3	100614024	100624747	11	7	3	7
466658	chr3	101393991	101404832	AC084198.1	chr3	101388132	101390264	502	264	281	349
715698	chr8	29122859	29136730	AC084262.1	chr8	29116227	29119371	42	34	70	48.6667
689166	chr7	95932648	95940705	AC084368.1	chr7	95928160	95944635	566	221	229	338.667
689166	chr7	95932648	95940705	AC084368.1	chr7	96322506	96324273	29	22	15	22
689166	chr7	95932648	95940705	AC084368.1	chr7	96644984	96653662	13	11	8	10.6667
285412	chr17	31202849	31210495	AC084809.2	chr17	31201229	31202799	261	182	200	214.333
704040	chr7	146593218	146593816	AC084872.1	chr7	146595122	146601239	271	163	180	204.667
243303	chr15	47534156	47536596	AC084882.1	chr15	47538175	47540429	481	330	318	376.333
243303	chr15	47534156	47536596	AC084882.1	chr15	48533126	48540711	8	4	7	6.33333
672493	chr7	36680627	36688729	AC087069.1	chr7	36688740	36691851	541	308	262	370.333
147537	chr12	20125723	20126936	AC087237.1	chr12	20120707	20131467	413	257	224	298
147537	chr12	20125723	20126936	AC087237.1	chr12	20516099	20533317	15	7	6	9.33333
283630	chr17	21116535	21129856	AC087294.2	chr17	21094641	21104384	89	128	52	89.6667
243225	chr15	47245893	47254578	AC087433.1	chr15	47255982	47262204	37	28	27	30.6667
251971	chr15	77540597	77547703	AC087465.1	chr15	77583787	77584713	13	5	10	9.33333
280628	chr17	9359412	9365360	AC087501.1	chr17	9369643	9378701	33	35	37	35
296791	chr17	76267001	76276392	AC087645.1	chr17	76277529	76287799	22	42	54	39.3333
253705	chr15	84280779	84287446	AC087738.1	chr15	84277125	84277590	172	196	209	192.333
239229	chr15	33484018	33489091	AC090098.1	chr15	33491032	33494444	1317	455	723	831.667
239229	chr15	33484018	33489091	AC090098.1	chr15	34500560	34516712	4	6	8	6
715125	chr8	27005062	27005677	AC090150.1	chr8	26558579	26577358	16	8	8	10.6667
715125	chr8	27005062	27005677	AC090150.1	chr8	27006817	27007455	513	395	331	413
721834	chr8	52724434	52732554	AC090186.1	chr8	52722151	52723562	95	45	74	71.3333
721834	chr8	52724434	52732554	AC090186.1	chr8	52914947	52926003	11	9	6	8.66667
303837	chr18	24166518	24173112	AC090206.1	chr18	24173212	24178396	155	132	131	139.333
313771	chr18	55680797	55693307	AC090324.1	chr18	55675934	55679750	308	278	236	274
313771	chr18	55680797	55693307	AC090324.1	chr18	56725805	56744811	7	5	4	5.33333
712737	chr8	18666233	18668800	AC090420.1	chr8	17923263	17930656	9	8	5	7.33333
712737	chr8	18666233	18668800	AC090420.1	chr8	18672215	18682853	524	106	104	244.667
745368	chr8	127151267	127154067	AC090573.1	chr8	127143190	127159190	93	35	63	63.6667
279109	chr17	2114048	2121936	AC090617.1	chr17	2107095	2107556	231	118	143	164
288929	chr17	46371490	46372886	AC090627.1	chr17	46362614	46367720	297	189	213	233
288929	chr17	46371490	46372886	AC090627.1	chr17	46668810	46680602	42	39	26	35.6667
441768	chr3	17175390	17191844	AC090644.1	chr3	16639661	16651818	20	18	13	17
441768	chr3	17175390	17191844	AC090644.1	chr3	17199758	17201809	160	182	106	149.333
312165	chr18	50460944	50467526	AC090660.1	chr18	50457758	50476442	157	110	114	127
312537	chr18	51611202	51614655	AC090666.1	chr18	51615375	51620737	20	8	13	13.6667
161125	chr12	66251080	66251924	AC090673.1	chr12	65695804	65703064	11	12	7	10
237778	chr15	28018948	28025560	AC090696.2	chr15	28028833	28033319	199	179	167	181.667
296437	chr17	74543027	74556654	AC090699.1	chr17	74527832	74532819	25	16	20	20.3333
258212	chr15	100287393	100293370	AC090825.2	chr15	100293926	100295205	131	106	129	122
258212	chr15	100287393	100293370	AC090825.2	chr15	100453164	100460398	6	10	7	7.66667
440001	chr3	10522297	10523952	AC090841.1	chr3	10507859	10520144	384	457	160	333.667
440001	chr3	10522297	10523952	AC090841.1	chr3	10730981	10746390	25	29	23	25.6667
441041	chr3	14689831	14693040	AC090952.5	chr3	14680504	14695234	629	345	330	434.667
441041	chr3	14689831	14693040	AC090952.5	chr3	14964906	14974450	60	68	46	58
441154	chr3	15160779	15177920	AC090954.1	chr3	14964906	14974450	5	7	10	7.33333
441154	chr3	15160779	15177920	AC090954.1	chr3	15193730	15198164	32	56	30	39.3333
441077	chr3	14807934	14812919	AC090957.2	chr3	14805959	14807854	209	128	176	171
727486	chr8	70598964	70614892	AC091047.1	chr8	70592087	70597204	212	147	98	152.333
727486	chr8	70598964	70614892	AC091047.1	chr8	70997791	71013808	32	14	11	19
256259	chr15	93959264	93963637	AC091078.1	chr15	93971342	93972806	122	129	89	113.333
256259	chr15	93959264	93963637	AC091078.1	chr15	94501490	94513693	11	10	6	9
734812	chr8	93647524	93656142	AC091096.1	chr8	93660603	93663651	120	81	86	95.6667
289089	chr17	47005121	47031529	AC091133.1	chr17	46992531	46996817	165	126	52	114.333
284937	chr17	29283181	29285996	AC091177.1	chr17	29280475	29281754	78	86	84	82.6667
102620	chr11	1521441	1540827	AC091196.1	chr11	1514200	1515740	204	316	211	243.667
304816	chr18	27057839	27064484	AC091321.1	chr18	27050677	27056282	254	124	147	175
567064	chr5	38814977	38822802	AC091435.2	chr5	38260833	38270410	6	5	4	5
567064	chr5	38814977	38822802	AC091435.2	chr5	38430400	38437037	13	8	11	10.6667
567064	chr5	38814977	38822802	AC091435.2	chr5	38808907	38809379	64	48	44	52
711701	chr8	15379224	15379628	AC091559.1	chr8	15375431	15382917	485	419	488	464
711701	chr8	15379224	15379628	AC091559.1	chr8	16627461	16640440	14	7	7	9.33333
316449	chr18	64320625	64323102	AC091643.1	chr18	64313477	64331571	136	121	96	117.667
666794	chr7	18336829	18339704	AC091697.1	chr7	17429006	17446756	8	4	7	6.33333
666794	chr7	18336829	18339704	AC091697.1	chr7	17736984	17740414	14	13	12	13
666794	chr7	18336829	18339704	AC091697.1	chr7	18107049	18113871	71	30	31	44
666794	chr7	18336829	18339704	AC091697.1	chr7	18332789	18346386	584	315	265	388
669124	chr7	25608722	25612226	AC091705.1	chr7	25291302	25295285	57	36	40	44.3333
669124	chr7	25608722	25612226	AC091705.1	chr7	25430460	25434134	90	45	24	53
669124	chr7	25608722	25612226	AC091705.1	chr7	25601689	25614431	141	295	312	249.333
669124	chr7	25608722	25612226	AC091705.1	chr7	25884737	25892417	46	18	32	32
661967	chr7	1119003	1133678	AC091729.8	chr7	1139130	1142253	121	208	146	158.333
661984	chr7	1197010	1200280	AC091729.9	chr7	1193385	1194266	258	273	221	250.667
700809	chr7	135479401	135491267	AC091736.1	chr7	135495387	135503002	201	235	117	184.333
700809	chr7	135479401	135491267	AC091736.1	chr7	135693962	135708333	216	225	48	163
700785	chr7	135390691	135395993	AC091736.11	chr7	135404263	135406001	50	46	49	48.3333
700785	chr7	135390691	135395993	AC091736.11	chr7	135693962	135710592	8	6	6	6.66667
571745	chr5	54478208	54482382	AC091977.1	chr5	54473684	54487375	247	117	140	168
53317	chr1	211373677	211385428	AC092017.1	chr1	210307954	210317100	12	12	5	9.66667
53317	chr1	211373677	211385428	AC092017.1	chr1	210748616	210753477	26	12	14	17.3333
53317	chr1	211373677	211385428	AC092017.1	chr1	211385739	211391727	196	144	141	160.333
689222	chr7	96132429	96133386	AC092031.1	chr7	96133645	96141301	551	606	552	569.667
689222	chr7	96132429	96133386	AC092031.1	chr7	96644984	96649925	26	28	10	21.3333
443863	chr3	23438751	23441692	AC092038.1	chr3	23433214	23444443	411	168	258	279
443863	chr3	23438751	23441692	AC092038.1	chr3	23851105	23868927	23	17	11	17
449824	chr3	42466644	42470502	AC092047.1	chr3	41944354	41952180	10	9	13	10.6667
449824	chr3	42466644	42470502	AC092047.1	chr3	42300919	42303356	117	69	82	89.3333
449824	chr3	42466644	42470502	AC092047.1	chr3	42475359	42485265	271	427	182	293.333
449822	chr3	42460470	42464729	AC092048.1	chr3	42300919	42313237	50	49	51	50
449822	chr3	42460470	42464729	AC092048.1	chr3	42470503	42475358	289	229	204	240.667
449822	chr3	42460470	42464729	AC092048.1	chr3	42937314	42956498	6	6	6	6
323272	chr19	19548703	19569634	AC092067.1	chr19	19570513	19577023	100	83	75	86
259207	chr16	2757400	2769027	AC092117.2	chr16	2742330	2748022	101	177	86	121.333
278636	chr16	90000222	90008860	AC092143.1	chr16	89994085	89999725	104	123	123	116.667
350521	chr2	62886472	62890963	AC092155.4	chr2	62894014	62896333	253	258	345	285.333
350521	chr2	62886472	62890963	AC092155.4	chr2	63238480	63258456	9	11	6	8.66667
332179	chr2	686044	694682	AC092159.3	chr2	695823	706156	723	177	148	349.333
332179	chr2	686044	694682	AC092159.3	chr2	1553448	1556131	19	13	18	16.6667
662829	chr7	5489147	5531165	AC092171.4	chr7	5461831	5481393	37	59	55	50.3333
6386	chr1	30113931	30119220	AC092265.1	chr1	30123753	30125571	204	249	152	201.667
324796	chr19	24176984	24192248	AC092279.1	chr19	24174560	24175164	257	245	191	231
324796	chr19	24176984	24192248	AC092279.1	chr19	24346651	24356925	11	8	5	8
324796	chr19	24176984	24192248	AC092279.1	chr19	24500287	24508351	4	4	3	3.66667
324796	chr19	24176984	24192248	AC092279.1	chr19	24535006	24541965	3	5	3	3.66667
327837	chr19	37017641	37022231	AC092295.4	chr19	37010098	37013559	258	150	125	177.667
327847	chr19	37061433	37072661	AC092295.7	chr19	37058733	37059041	41	16	28	28.3333
278013	chr16	86376427	86380148	AC092327.1	chr16	86546073	86549983	45	46	29	40
278467	chr16	89001969	89011311	AC092384.1	chr16	89015142	89024679	284	386	217	295.667
278467	chr16	89001969	89011311	AC092384.1	chr16	89194541	89213355	37	124	70	77
496703	chr4	1134385	1146135	AC092535.3	chr4	1147179	1147789	59	72	60	63.6667
510353	chr4	47559161	47563599	AC092597.3	chr4	47554004	47557671	176	112	120	136
510353	chr4	47559161	47563599	AC092597.3	chr4	47937473	47945770	5	4	6	5
548411	chr4	168824018	168830177	AC092621.1	chr4	168830913	168836363	123	68	63	84.6667
373134	chr2	144410041	144420884	AC092652.1	chr2	144402973	144406717	34	11	20	21.6667
360127	chr2	100718771	100723132	AC092667.2	chr2	100731311	100738044	103	91	107	100.333
351685	chr2	66666185	66670392	AC092669.4	chr2	65942066	65950426	12	9	12	11
351685	chr2	66666185	66670392	AC092669.4	chr2	66796444	66806976	57	42	36	45
351685	chr2	66666185	66670392	AC092669.4	chr2	67619772	67627450	12	9	6	9
351685	chr2	66666185	66670392	AC092669.4	chr2	68062614	68069383	8	8	7	7.66667
359653	chr2	98968858	98974970	AC092675.3	chr2	98413372	98423694	27	20	21	22.6667
359653	chr2	98968858	98974970	AC092675.3	chr2	98616781	98630057	14	7	8	9.66667
359653	chr2	98968858	98974970	AC092675.3	chr2	98967280	98978562	304	228	226	252.667
275798	chr16	77743478	77758893	AC092724.1	chr16	77739225	77743462	384	206	158	249.333
275798	chr16	77743478	77758893	AC092724.1	chr16	78001587	78013873	42	38	18	32.6667
247016	chr15	59507189	59510619	AC092756.1	chr15	59512357	59517431	379	250	350	326.333
247016	chr15	59507189	59510619	AC092756.1	chr15	59793311	59796161	28	24	26	26
246994	chr15	59443065	59446355	AC092757.1	chr15	59256467	59276263	23	28	18	23
246994	chr15	59443065	59446355	AC092757.1	chr15	59783525	59799351	56	32	27	38.3333
56736	chr1	222186067	222186868	AC092765.1	chr1	221131728	221141992	5	2	5	4
56736	chr1	222186067	222186868	AC092765.1	chr1	221918305	221934250	15	25	11	17
56736	chr1	222186067	222186868	AC092765.1	chr1	222190732	222194868	378	198	214	263.333
370824	chr2	137402452	137404553	AC092786.1	chr2	137406493	137406979	424	474	348	415.333
57694	chr1	225596388	225605175	AC092811.1	chr1	225589944	225609348	499	258	370	375.667
57694	chr1	225596388	225605175	AC092811.1	chr1	225951977	225956693	14	12	14	13.3333
25848	chr1	96351954	96358269	AC092812.1	chr1	96361735	96364721	35	32	35	34
347983	chr2	54765447	54769186	AC092839.3	chr2	54334493	54339450	11	8	10	9.66667
347983	chr2	54765447	54769186	AC092839.3	chr2	54771379	54780973	238	361	341	313.333
347986	chr2	54772738	54774404	AC092839.4	chr2	54769187	54778585	214	239	121	191.333
347986	chr2	54772738	54774404	AC092839.4	chr2	55395769	55410623	7	6	5	6
379159	chr2	162774454	162776434	AC092841.1	chr2	162444269	162458478	24	21	13	19.3333
379159	chr2	162774454	162776434	AC092841.1	chr2	162766811	162783327	170	250	122	180.667
379159	chr2	162774454	162776434	AC092841.1	chr2	162974675	162990674	24	21	10	18.3333
503268	chr4	24419783	24424102	AC092846.1	chr4	23133200	23141628	67	23	20	36.6667
503268	chr4	24419783	24424102	AC092846.1	chr4	23348402	23368169	7	29	6	14
503268	chr4	24419783	24424102	AC092846.1	chr4	23686377	23703196	20	14	14	16
503268	chr4	24419783	24424102	AC092846.1	chr4	24412684	24427540	600	428	338	455.333
469150	chr3	109211192	109216733	AC092905.1	chr3	109194518	109208140	268	91	62	140.333
480834	chr3	147623803	147637757	AC092925.1	chr3	147639243	147644351	146	217	205	189.333
480894	chr3	147796068	147801751	AC092958.1	chr3	147791224	147805228	208	256	152	205.333
488729	chr3	172028675	172038648	AC092964.1	chr3	171764952	171777210	47	40	32	39.6667
488729	chr3	172028675	172038648	AC092964.1	chr3	172014327	172019217	340	248	205	264.333
487024	chr3	166739867	166750900	AC092965.1	chr3	165557771	165569754	7	8	3	6
495117	chr3	192875877	192886568	AC092966.1	chr3	192508271	192517411	25	14	19	19.3333
495117	chr3	192875877	192886568	AC092966.1	chr3	192868721	192874539	276	152	136	188
475374	chr3	130087764	130088332	AC093004.1	chr3	130085086	130086745	612	545	483	546.667
178711	chr12	125737810	125747583	AC093028.1	chr12	125748955	125750459	204	212	168	194.667
348032	chr2	54888688	54892284	AC093110.3	chr2	54333570	54339450	39	53	29	40.3333
348032	chr2	54888688	54892284	AC093110.3	chr2	54755752	54765446	111	96	60	89
348032	chr2	54888688	54892284	AC093110.3	chr2	54885565	54888306	892	576	512	660
348032	chr2	54888688	54892284	AC093110.3	chr2	55408689	55413457	32	40	12	28
357294	chr2	85520234	85532793	AC093162.1	chr2	85285753	85289161	29	20	17	22
357294	chr2	85520234	85532793	AC093162.1	chr2	85541865	85545274	46	75	57	59.3333
400582	chr2	230989680	230999008	AC093171.1	chr2	231000602	231009701	282	184	161	209
593250	chr5	122111880	122113314	AC093267.1	chr5	121316739	121318911	9	6	5	6.66667
593250	chr5	122111880	122113314	AC093267.1	chr5	122103672	122114734	419	516	661	532
593250	chr5	122111880	122113314	AC093267.1	chr5	122812575	122823201	13	8	7	9.33333
593250	chr5	122111880	122113314	AC093267.1	chr5	122923787	122929485	11	10	7	9.33333
606980	chr5	167292237	167300942	AC093304.1	chr5	167305328	167306177	199	199	185	194.333
584199	chr5	93913103	93917429	AC093311.1	chr5	93908820	93912720	244	175	167	195.333
332443	chr2	1822020	1835491	AC093390.1	chr2	1814418	1821817	229	179	109	172.333
370607	chr2	136741463	136749415	AC093391.2	chr2	136735943	136754653	73	30	69	57.3333
370607	chr2	136741463	136749415	AC093391.2	chr2	136876154	136879429	24	16	12	17.3333
370607	chr2	136741463	136749415	AC093391.2	chr2	137133665	137139709	18	18	19	18.3333
440914	chr3	14185108	14187206	AC093495.4	chr3	13932856	13940372	16	7	8	10.3333
440914	chr3	14185108	14187206	AC093495.4	chr3	14184209	14198180	220	134	228	194
582923	chr5	89769063	89774911	AC093510.2	chr5	89779895	89787223	308	165	177	216.667
260411	chr16	7939645	7955930	AC093515.1	chr16	7956364	7956725	58	51	16	41.6667
24976	chr1	93446633	93461668	AC093577.1	chr1	93464463	93465960	410	355	298	354.333
25013	chr1	93566378	93572383	AC093577.4	chr1	93552569	93558198	100	90	82	90.6667
403222	chr2	241949478	241961496	AC093585.6	chr2	241967796	241981793	295	284	145	241.333
403222	chr2	241949478	241961496	AC093585.6	chr2	242361140	242372246	11	21	15	15.6667
440785	chr3	13687304	13698891	AC093611.1	chr3	13918274	13919093	17	24	23	21.3333
440785	chr3	13687304	13698891	AC093611.1	chr3	14152756	14159507	3	8	9	6.66667
662823	chr7	5441213	5461830	AC093620.5	chr7	5470760	5471307	89	116	72	92.3333
527860	chr4	105411790	105414767	AC093628.1	chr4	105409627	105419716	320	329	307	318.667
528518	chr4	107332845	107343411	AC093680.1	chr4	107348141	107351759	88	42	87	72.3333
340046	chr2	28533312	28534163	AC093690.1	chr2	28530219	28531234	217	290	220	242.333
681097	chr7	68525974	68529366	AC093693.1	chr7	68519789	68523306	334	336	244	304.667
545554	chr4	159919519	159928740	AC093700.1	chr4	159932015	159932250	178	117	138	144.333
706203	chr7	154718902	154726320	AC093726.6	chr7	154713714	154717565	291	203	210	234.667
706203	chr7	154718902	154726320	AC093726.6	chr7	154981659	154985167	16	22	15	17.6667
706203	chr7	154718902	154726320	AC093726.6	chr7	155328020	155332324	13	12	12	12.3333
706203	chr7	154718902	154726320	AC093726.6	chr7	155547501	155563538	6	5	9	6.66667
345607	chr2	47263467	47268906	AC093732.1	chr2	47261978	47281046	188	169	166	174.333
662035	chr7	1576433	1606883	AC093734.14	chr7	1614363	1614998	32	47	18	32.3333
402976	chr2	240671838	240684830	AC093802.1	chr2	240688271	240689166	119	183	134	145.333
545072	chr4	158506469	158509536	AC093817.1	chr4	158510854	158513586	34	17	30	27
550952	chr4	176663921	176671121	AC093819.1	chr4	176672049	176677121	132	71	70	91
395313	chr2	213625136	213630979	AC093865.1	chr2	213631709	213645878	87	110	131	109.333
395313	chr2	213625136	213630979	AC093865.1	chr2	214021766	214026297	36	16	12	21.3333
519280	chr4	79107742	79110300	AC093897.1	chr4	79101967	79113304	415	171	248	278
19847	chr1	77854739	77859422	AC095030.1	chr1	76538023	76556450	9	5	7	7
19847	chr1	77854739	77859422	AC095030.1	chr1	77861160	77863244	629	389	402	473.333
513708	chr4	61524272	61536848	AC095061.1	chr4	61537368	61538025	113	76	70	86.3333
373072	chr2	144232410	144239878	AC096558.1	chr2	144226688	144231440	374	133	230	245.667
373072	chr2	144232410	144239878	AC096558.1	chr2	144826009	144840415	9	8	4	7
377575	chr2	157786571	157789208	AC096589.1	chr2	157780267	157793023	301	173	126	200
50334	chr1	200111191	200115077	AC096633.1	chr1	199648295	199657498	15	13	18	15.3333
50334	chr1	200111191	200115077	AC096633.1	chr1	200119139	200125151	191	91	86	122.667
50334	chr1	200111191	200115077	AC096633.1	chr1	200458109	200460977	29	26	34	29.6667
55934	chr1	219561338	219575438	AC096642.1	chr1	219557600	219560903	435	262	117	271.333
55934	chr1	219561338	219575438	AC096642.1	chr1	219836814	219841565	27	33	24	28
56017	chr1	219834718	219836813	AC096643.1	chr1	218498973	218509081	27	22	15	21.3333
56017	chr1	219834718	219836813	AC096643.1	chr1	219380808	219390436	72	15	55	47.3333
56017	chr1	219834718	219836813	AC096643.1	chr1	219579620	219594180	35	35	31	33.6667
56017	chr1	219834718	219836813	AC096643.1	chr1	219837930	219841565	550	377	380	435.667
56234	chr1	220606232	220609971	AC096644.1	chr1	220093670	220108986	5	5	5	5
51294	chr1	203964633	203970158	AC096645.1	chr1	203950830	203961979	268	266	221	251.667
383373	chr2	176193018	176199329	AC096649.1	chr2	176204407	176204912	377	379	257	337.667
383373	chr2	176193018	176199329	AC096649.1	chr2	176936338	176940240	33	36	17	28.6667
350835	chr2	63919848	63925484	AC096664.1	chr2	63909821	63916529	140	123	87	116.667
350835	chr2	63919848	63925484	AC096664.1	chr2	64089509	64099006	103	150	73	108.667
386396	chr2	185464323	185473477	AC096667.1	chr2	185474929	185477497	572	300	152	341.333
386396	chr2	185464323	185473477	AC096667.1	chr2	185622924	185634767	29	24	24	25.6667
386396	chr2	185464323	185473477	AC096667.1	chr2	186129624	186138918	10	7	6	7.66667
363330	chr2	111872736	111883621	AC096670.3	chr2	111574300	111583733	35	43	49	42.3333
363330	chr2	111872736	111883621	AC096670.3	chr2	111871928	111886600	379	208	298	295
499451	chr4	12795948	12803998	AC096750.1	chr4	12804456	12807741	135	54	87	92
457094	chr3	68678183	68687054	AC096922.1	chr3	68373268	68389221	6	4	5	5
457094	chr3	68678183	68687054	AC096922.1	chr3	68690230	68697551	203	178	42	141
457801	chr3	70926100	70934093	AC096971.1	chr3	70622807	70637930	14	10	7	10.3333
457801	chr3	70926100	70934093	AC096971.1	chr3	70925240	70935831	256	289	229	258
457801	chr3	70926100	70934093	AC096971.1	chr3	71646993	71665080	14	5	5	8
452389	chr3	53241813	53245478	AC097015.1	chr3	53239383	53241366	266	138	126	176.667
452389	chr3	53241813	53245478	AC097015.1	chr3	53745525	53751136	4	7	3	4.66667
445710	chr3	29049420	29053742	AC097361.1	chr3	29055408	29070323	206	54	117	125.667
541405	chr4	147043195	147043441	AC097372.1	chr4	146103463	146106785	13	13	10	12
541405	chr4	147043195	147043441	AC097372.1	chr4	146558982	146564368	7	6	9	7.33333
541405	chr4	147043195	147043441	AC097372.1	chr4	146847955	146859716	28	22	23	24.3333
541405	chr4	147043195	147043441	AC097372.1	chr4	147823392	147842663	6	5	4	5
504236	chr4	27620878	27639303	AC097380.1	chr4	27618127	27618440	71	50	54	58.3333
498125	chr4	7939815	7944483	AC097381.1	chr4	7947463	7947763	180	165	154	166.333
543187	chr4	152482037	152487206	AC097455.1	chr4	152479224	152479783	379	273	249	300.333
398350	chr2	223777367	223787348	AC097461.4	chr2	223171790	223179024	11	11	8	10
398350	chr2	223777367	223787348	AC097461.4	chr2	223552712	223569521	99	86	64	83
398350	chr2	223777367	223787348	AC097461.4	chr2	224327464	224330062	15	4	5	8
544352	chr4	156273862	156277968	AC097467.2	chr4	155476953	155480034	22	7	8	12.3333
544352	chr4	156273862	156277968	AC097467.2	chr4	155725290	155734924	39	27	29	31.6667
544352	chr4	156273862	156277968	AC097467.2	chr4	155904092	155908886	23	21	18	20.6667
544352	chr4	156273862	156277968	AC097467.2	chr4	156266289	156271319	294	169	195	219.333
544352	chr4	156273862	156277968	AC097467.2	chr4	156724669	156726123	12	14	12	12.6667
352440	chr2	69050828	69060264	AC097495.2	chr2	68697017	68701343	31	19	18	22.6667
352440	chr2	69050828	69060264	AC097495.2	chr2	69061155	69061460	836	327	463	542
550110	chr4	174189057	174189493	AC097534.1	chr4	173938624	173958267	54	48	50	50.6667
550110	chr4	174189057	174189493	AC097534.1	chr4	174181415	174196639	384	163	290	279
388754	chr2	192782923	192787339	AC098617.1	chr2	192778100	192778520	63	57	33	51
388741	chr2	192705523	192718847	AC098617.2	chr2	192416521	192419954	30	21	21	24
388741	chr2	192705523	192718847	AC098617.2	chr2	192721161	192726826	405	204	203	270.667
388741	chr2	192705523	192718847	AC098617.2	chr2	193022372	193029540	41	46	36	41
450502	chr3	44823334	44834832	AC098649.1	chr3	44350622	44368573	6	3	2	3.66667
450502	chr3	44823334	44834832	AC098649.1	chr3	44838239	44839495	62	48	57	55.6667
445857	chr3	29407562	29412112	AC098650.1	chr3	29413584	29415326	263	165	212	213.333
507595	chr4	38237905	38244524	AC098680.1	chr4	38252115	38259473	203	122	114	146.333
24534	chr1	91851952	91860609	AC098691.1	chr1	90569787	90585834	7	6	3	5.33333
24534	chr1	91851952	91860609	AC098691.1	chr1	91638852	91642085	15	11	12	12.6667
24534	chr1	91851952	91860609	AC098691.1	chr1	91845151	91849670	252	132	147	177
396529	chr2	217344416	217355616	AC098820.4	chr2	217342467	217343802	25	6	16	15.6667
499727	chr4	13656172	13660692	AC098830.1	chr4	13650241	13652483	36	14	8	19.3333
314281	chr18	57412470	57418000	AC098847.1	chr18	57418401	57419008	117	86	76	93
508169	chr4	40462512	40474955	AC098869.1	chr4	40477753	40478016	306	178	201	228.333
388725	chr2	192653057	192660372	AC098872.3	chr2	192418572	192419954	13	14	9	12
388725	chr2	192653057	192660372	AC098872.3	chr2	192663020	192666109	101	51	90	80.6667
388725	chr2	192653057	192660372	AC098872.3	chr2	193022372	193031660	25	18	19	20.6667
543547	chr4	153818551	153824482	AC099339.1	chr4	153813657	153815435	473	210	272	318.333
261248	chr16	11578222	11592606	AC099489.1	chr16	11563396	11569219	41	54	45	46.6667
277230	chr16	82868141	82877186	AC099506.1	chr16	82864976	82866322	186	195	173	184.667
445202	chr3	27397888	27406909	AC099535.1	chr3	27407980	27408625	248	158	175	193.667
445202	chr3	27397888	27406909	AC099535.1	chr3	27702290	27721880	24	16	10	16.6667
450707	chr3	45632014	45645644	AC099539.1	chr3	45649911	45665906	337	140	72	183
446530	chr3	31435762	31437655	AC099540.1	chr3	31432798	31434332	545	658	454	552.333
455442	chr3	63318853	63324204	AC099545.1	chr3	63794366	63804233	55	30	25	36.6667
455442	chr3	63318853	63324204	AC099545.1	chr3	63996000	64006385	10	9	6	8.33333
706283	chr7	154986672	154991769	AC099552.4	chr7	154984226	154985167	115	102	117	111.333
63180	chr1	244744391	244757248	AC099757.1	chr1	244762038	244763461	528	369	318	405
63180	chr1	244744391	244757248	AC099757.1	chr1	245187759	245204831	12	19	13	14.6667
313531	chr18	54813047	54831932	AC100775.1	chr18	54812549	54812947	126	134	89	116.333
297078	chr17	77782841	77807007	AC100791.2	chr17	77772911	77773716	131	187	105	141
713153	chr8	19931874	19944876	AC100802.3	chr8	19231252	19244052	22	15	15	17.3333
749919	chr8	142516976	142519160	AC100803.1	chr8	142508513	142511549	57	53	58	56
291938	chr17	57066082	57069739	AC100832.1	chr17	56780567	56793498	11	8	4	7.66667
291938	chr17	57066082	57069739	AC100832.1	chr17	57060361	57062876	319	92	61	157.333
290175	chr17	51061277	51064056	AC102948.1	chr17	51053627	51070196	177	259	263	233
358796	chr2	95709112	95720490	AC103563.9	chr2	95705524	95707509	229	447	218	298
358796	chr2	95709112	95720490	AC103563.9	chr2	96024374	96043813	7	8	6	7
444689	chr3	25911297	25919877	AC103588.1	chr3	25676532	25687664	27	9	12	16
720594	chr8	48792847	48810864	AC103686.1	chr8	48790048	48791900	402	196	195	264.333
103314	chr11	4729406	4735188	AC103710.1	chr11	4723706	4725263	309	258	243	270
106788	chr11	16144657	16146562	AC103794.1	chr11	16149607	16151340	508	311	329	382.667
108823	chr11	22634465	22649497	AC103801.2	chr11	22348641	22367622	4	13	7	8
108823	chr11	22634465	22649497	AC103801.2	chr11	22651345	22655001	57	42	46	48.3333
108823	chr11	22634465	22649497	AC103801.2	chr11	22844503	22858781	8	5	3	5.33333
732162	chr8	85207952	85213374	AC103816.1	chr8	85203333	85206742	120	80	63	87.6667
116607	chr11	48028349	48056146	AC103828.1	chr11	48058970	48068998	194	109	40	114.333
742170	chr8	117142014	117149562	AC103863.1	chr8	117151558	117151753	626	424	487	512.333
256406	chr15	94438428	94443402	AC103996.1	chr15	94434858	94436339	368	245	225	279.333
728184	chr8	72743513	72744958	AC104012.1	chr8	72747516	72750442	566	239	286	363.667
728184	chr8	72743513	72744958	AC104012.1	chr8	72894424	72908247	95	53	50	66
728184	chr8	72743513	72744958	AC104012.1	chr8	73067155	73068860	117	84	59	86.6667
728184	chr8	72743513	72744958	AC104012.1	chr8	73192077	73202249	15	15	9	13
282710	chr17	16890665	16896704	AC104024.2	chr17	16435820	16446263	6	6	6	6
282710	chr17	16890665	16896704	AC104024.2	chr17	16877118	16884108	38	43	36	39
385186	chr2	181844443	181846639	AC104076.3	chr2	180851705	180862526	17	14	11	14
385186	chr2	181844443	181846639	AC104076.3	chr2	180986933	180999607	53	41	24	39.3333
385186	chr2	181844443	181846639	AC104076.3	chr2	181398651	181405070	48	53	32	44.3333
385186	chr2	181844443	181846639	AC104076.3	chr2	181849146	181857861	266	155	272	231
385186	chr2	181844443	181846639	AC104076.3	chr2	182558289	182568990	13	8	15	12
385186	chr2	181844443	181846639	AC104076.3	chr2	182942133	182952587	17	4	10	10.3333
573565	chr5	60211231	60220325	AC104113.3	chr5	59982715	59984047	36	21	35	30.6667
573565	chr5	60211231	60220325	AC104113.3	chr5	60220425	60221072	262	149	188	199.667
706483	chr7	155663991	155677017	AC104133.1	chr7	155677885	155678774	53	63	69	61.6667
22313	chr1	85258626	85259072	AC104169.1	chr1	84591752	84607314	10	8	6	8
22313	chr1	85258626	85259072	AC104169.1	chr1	85249884	85261989	459	246	236	313.667
744023	chr8	122648732	122658380	AC104233.1	chr8	121981087	121990204	10	12	7	9.66667
744023	chr8	122648732	122658380	AC104233.1	chr8	122270505	122284603	27	20	12	19.6667
744023	chr8	122648732	122658380	AC104233.1	chr8	122644083	122644282	236	178	173	195.667
255894	chr15	92514852	92521622	AC104236.1	chr15	91833933	91849012	8	12	7	9
255894	chr15	92514852	92521622	AC104236.1	chr15	92243075	92256888	7	7	6	6.66667
255894	chr15	92514852	92521622	AC104236.1	chr15	92522399	92528077	255	126	148	176.333
450978	chr3	46615946	46618741	AC104304.1	chr3	46607326	46611550	122	110	114	115.333
734655	chr8	93179646	93180246	AC104339.1	chr8	93185666	93188052	58	110	44	70.6667
114564	chr11	40781068	40782918	AC104387.1	chr11	40772338	40778834	354	200	188	247.333
103466	chr11	5225324	5241469	AC104389.16	chr11	5217158	5218974	152	100	62	104.667
103466	chr11	5225324	5241469	AC104389.16	chr11	5828446	5843866	7	12	2	7
369541	chr2	133277794	133288326	AC104405.1	chr2	133269016	133277337	175	221	173	189.667
750005	chr8	143021958	143030727	AC104417.1	chr8	143015715	143018039	186	268	147	200.333
450014	chr3	43250282	43252715	AC104434.1	chr3	43009908	43010740	38	29	21	29.3333
450014	chr3	43250282	43252715	AC104434.1	chr3	43245388	43246365	499	470	357	442
450014	chr3	43250282	43252715	AC104434.1	chr3	43545424	43553218	31	26	31	29.3333
443138	chr3	21174454	21180242	AC104441.1	chr3	21170160	21173774	33	21	32	28.6667
443138	chr3	21174454	21180242	AC104441.1	chr3	21624041	21635454	3	2	5	3.33333
27352	chr1	100838675	100845342	AC104457.1	chr1	100845608	100847052	64	27	37	42.6667
483367	chr3	155459208	155463682	AC104472.1	chr3	154031723	154033181	19	7	9	11.6667
483367	chr3	155459208	155463682	AC104472.1	chr3	154501277	154507175	7	7	10	8
483367	chr3	155459208	155463682	AC104472.1	chr3	154871792	154887709	18	5	3	8.66667
483367	chr3	155459208	155463682	AC104472.1	chr3	155453754	155470079	550	374	176	366.667
336695	chr2	16702524	16708458	AC104623.2	chr2	15774555	15785617	32	37	26	31.6667
336695	chr2	16702524	16708458	AC104623.2	chr2	16070908	16072330	35	30	17	27.3333
336695	chr2	16702524	16708458	AC104623.2	chr2	16700363	16715304	456	365	285	368.667
336695	chr2	16702524	16708458	AC104623.2	chr2	16925810	16941043	69	42	29	46.6667
361637	chr2	105717464	105731002	AC104655.2	chr2	105732500	105739459	168	171	259	199.333
402498	chr2	238498712	238509861	AC104667.3	chr2	238511294	238512274	264	208	258	243.333
339308	chr2	25639818	25653459	AC104699.1	chr2	25633899	25637987	213	189	175	192.333
348062	chr2	54971580	54977395	AC104781.1	chr2	54978516	54978670	698	502	579	593
334824	chr2	10223532	10224297	AC104794.4	chr2	9947520	9954096	26	44	26	32
334824	chr2	10223532	10224297	AC104794.4	chr2	10235582	10242963	153	240	98	163.667
334824	chr2	10223532	10224297	AC104794.4	chr2	10802404	10805902	28	26	19	24.3333
398750	chr2	225102992	225109926	AC104802.1	chr2	225098795	225099831	206	143	174	174.333
403204	chr2	241841318	241867093	AC104809.3	chr2	241868587	241870565	270	417	148	278.333
20214	chr1	79152520	79154652	AC104837.1	chr1	78606807	78612741	27	14	15	18.6667
20214	chr1	79152520	79154652	AC104837.1	chr1	79147051	79148208	378	240	256	291.333
116513	chr11	47598873	47600306	AC104942.1	chr11	47602284	47605995	289	267	218	258
357407	chr2	86038814	86043064	AC105053.3	chr2	86307338	86309564	132	134	84	116.667
313918	chr18	56133335	56134967	AC105105.1	chr18	55643354	55655179	12	12	5	9.66667
313918	chr18	56133335	56134967	AC105105.1	chr18	55835110	55845189	21	18	18	19
313918	chr18	56133335	56134967	AC105105.1	chr18	56126002	56140865	354	383	242	326.333
248735	chr15	65667181	65670844	AC105129.1	chr15	65650002	65658786	307	325	165	265.667
304733	chr18	26776373	26778544	AC105245.1	chr18	26772775	26774159	54	31	26	37
550092	chr4	174098090	174109628	AC105285.1	chr4	174094392	174095437	451	235	230	305.333
550092	chr4	174098090	174109628	AC105285.1	chr4	175186516	175195157	4	3	4	3.66667
545658	chr4	160214977	160218478	AC105316.1	chr4	160210017	160212922	443	260	388	363.667
340248	chr2	29320296	29330046	AC105398.3	chr2	30354228	30356897	2	2	2	2
374895	chr2	149637499	149652244	AC105402.4	chr2	148712958	148732782	7	5	6	6
374895	chr2	149637499	149652244	AC105402.4	chr2	149657894	149658134	193	173	131	165.667
401011	chr2	232861098	232882131	AC105461.1	chr2	232855342	232859104	321	188	154	221
402342	chr2	237963367	237973252	AC105760.3	chr2	237257940	237272999	33	22	13	22.6667
402342	chr2	237963367	237973252	AC105760.3	chr2	237420945	237425836	61	54	53	56
402342	chr2	237963367	237973252	AC105760.3	chr2	237973441	237974862	221	264	201	228.667
50055	chr1	199165329	199171424	AC105941.1	chr1	198761737	198781661	23	18	10	17
50055	chr1	199165329	199171424	AC105941.1	chr1	199158506	199173694	429	288	247	321.333
495696	chr3	194812046	194817485	AC106705.2	chr3	194400760	194403841	56	50	54	53.3333
495696	chr3	194812046	194817485	AC106705.2	chr3	194806724	194810155	157	164	119	146.667
482217	chr3	151979492	151989579	AC106722.1	chr3	151801750	151803570	34	17	14	21.6667
482217	chr3	151979492	151989579	AC106722.1	chr3	151974744	151975956	367	176	211	251.333
482217	chr3	151979492	151989579	AC106722.1	chr3	152571944	152580198	8	5	2	5
577774	chr5	73565188	73569384	AC106732.1	chr5	73553902	73562976	477	312	301	363.333
273976	chr16	71361756	71371750	AC106736.1	chr16	71377005	71377261	190	150	137	159
603662	chr5	156984006	156994058	AC106801.1	chr5	156981351	156981872	101	67	56	74.6667
546200	chr4	161923883	161926537	AC106860.1	chr4	161926932	161935742	46	25	40	37
340491	chr2	30111991	30114675	AC106870.1	chr2	29500109	29505151	10	20	5	11.6667
340491	chr2	30111991	30114675	AC106870.1	chr2	30105861	30119514	262	246	233	247
340496	chr2	30121640	30123897	AC106870.2	chr2	30119515	30124864	397	378	224	333
695116	chr7	116604326	116608061	AC106873.4	chr7	116268296	116274992	8	6	5	6.33333
695116	chr7	116604326	116608061	AC106873.4	chr7	116608815	116609674	683	386	486	518.333
695116	chr7	116604326	116608061	AC106873.4	chr7	116754961	116766874	89	44	78	70.3333
401269	chr2	233876686	233877947	AC106876.2	chr2	233882279	233885650	470	413	393	425.333
179701	chr12	129149066	129161674	AC107020.1	chr12	129164450	129167142	158	198	127	161
179701	chr12	129149066	129161674	AC107020.1	chr12	130379104	130393786	5	10	9	8
480240	chr3	145779886	145782471	AC107021.1	chr3	145789724	145790768	263	199	192	218
480240	chr3	145779886	145782471	AC107021.1	chr3	145903243	145906314	153	86	79	106
480240	chr3	145779886	145782471	AC107021.1	chr3	146307579	146321162	37	27	26	30
480240	chr3	145779886	145782471	AC107021.1	chr3	146908654	146925338	11	5	4	6.66667
510490	chr4	47974062	47978426	AC107068.1	chr4	47962449	47968460	84	65	69	72.6667
350298	chr2	62094729	62096825	AC107081.5	chr2	62092775	62104530	296	176	204	225.333
283207	chr17	19205690	19214834	AC107982.5	chr17	19199048	19200809	21	16	11	16
278766	chr17	262444	263865	AC108004.3	chr17	290033	293664	51	54	34	46.3333
278766	chr17	262444	263865	AC108004.3	chr17	603865	612288	82	57	50	63
333573	chr2	5828892	5834630	AC108025.2	chr2	5837686	5838580	116	103	125	114.667
251126	chr15	74180278	74184835	AC108137.1	chr15	74185767	74199346	133	213	133	159.667
251126	chr15	74180278	74184835	AC108137.1	chr15	74505947	74509300	8	9	6	7.66667
512044	chr4	56135731	56139818	AC108209.1	chr4	55839575	55848246	24	25	16	21.6667
512044	chr4	56135731	56139818	AC108209.1	chr4	56140067	56141015	221	160	176	185.667
544649	chr4	157215059	157219250	AC108211.1	chr4	157223018	157229951	302	133	218	217.667
544649	chr4	157215059	157219250	AC108211.1	chr4	157980544	157996853	7	16	9	10.6667
102890	chr11	3208601	3219519	AC108448.3	chr11	3226277	3228821	48	74	47	56.3333
332335	chr2	1345434	1350653	AC108462.1	chr2	1351836	1353661	173	254	176	201
363370	chr2	111993002	112000145	AC108463.1	chr2	111988556	112002961	315	187	98	200
462089	chr3	84339096	84348796	AC108696.1	chr3	84350777	84353065	208	176	157	180.333
464946	chr3	96151680	96157352	AC108697.1	chr3	96146339	96160285	89	81	84	84.6667
464867	chr3	95878375	95902979	AC108739.1	chr3	95903387	95907819	76	43	34	51
250420	chr15	71766077	71779026	AC108861.1	chr15	71298327	71307485	17	14	4	11.6667
554364	chr4	187778610	187781422	AC108865.1	chr4	187772910	187784274	252	195	107	184.667
537959	chr4	136291196	136294250	AC108867.1	chr4	135672332	135687385	7	5	4	5.33333
537959	chr4	136291196	136294250	AC108867.1	chr4	136284245	136294772	408	256	253	305.667
102897	chr11	3245576	3248332	AC109309.4	chr11	3250248	3257566	242	343	229	271.333
311655	chr18	48917605	48919292	AC109315.1	chr18	48923442	48925594	31	20	19	23.3333
504897	chr4	29751237	29752632	AC109351.1	chr4	29738273	29751042	173	164	174	170.333
533933	chr4	123925124	123929327	AC109357.1	chr4	123929820	123935202	41	17	24	27.3333
573410	chr5	59724641	59730170	AC109486.1	chr5	59112566	59127209	16	19	13	16
573410	chr5	59724641	59730170	AC109486.1	chr5	59731899	59742678	606	142	336	361.333
580803	chr5	83267748	83271718	AC109496.1	chr5	83272168	83291825	223	74	155	150.667
445563	chr3	28614815	28621005	AC109586.1	chr3	28622471	28624455	354	290	272	305.333
445563	chr3	28614815	28621005	AC109586.1	chr3	28925761	28938590	7	8	8	7.66667
339830	chr2	27756552	27761312	AC109829.1	chr2	27752193	27755002	204	78	123	135
828773	chrX	149654590	149661925	AC109994.1	chrX	149122677	149134828	15	21	18	18
828773	chrX	149654590	149661925	AC109994.1	chrX	149666109	149669459	149	111	114	124.667
297372	chr17	79371698	79373802	AC110285.1	chr17	79375301	79381224	249	226	178	217.667
511666	chr4	54965701	54970271	AC110298.1	chr4	54560284	54572756	22	10	16	16
511666	chr4	54965701	54970271	AC110298.1	chr4	54781359	54786353	48	65	36	49.6667
511666	chr4	54965701	54970271	AC110298.1	chr4	54952362	54960667	436	184	298	306
465380	chr3	97540233	97541685	AC110491.1	chr3	97536004	97544982	347	391	359	365.667
465380	chr3	97540233	97541685	AC110491.1	chr3	98297495	98311494	8	7	14	9.66667
512245	chr4	56793047	56801123	AC110611.1	chr4	56787431	56792886	261	151	123	178.333
364136	chr2	114746134	114749226	AC110769.1	chr2	114743391	114746119	817	534	686	679
364136	chr2	114746134	114749226	AC110769.1	chr2	115298011	115303827	15	14	7	12
662075	chr7	1881075	1888085	AC110781.5	chr7	1890644	1902380	151	258	150	186.333
542917	chr4	151559524	151562309	AC110813.1	chr4	151558344	151564996	240	116	84	146.667
296612	chr17	75437247	75443481	AC111170.2	chr17	75433935	75453439	315	385	216	305.333
296612	chr17	75437247	75443481	AC111170.2	chr17	76007711	76016516	13	22	11	15.3333
296608	chr17	75420227	75431898	AC111170.3	chr17	76000788	76020527	6	10	3	6.33333
103736	chr11	6141438	6150252	AC111177.1	chr11	6155962	6158112	9	5	12	8.66667
571624	chr5	54146426	54152522	AC112198.1	chr5	53834166	53842849	26	27	20	24.3333
571624	chr5	54146426	54152522	AC112198.1	chr5	54153346	54161925	246	140	136	174
458242	chr3	72310003	72312584	AC112219.1	chr3	71778668	71779250	27	20	15	20.6667
458242	chr3	72310003	72312584	AC112219.1	chr3	72003880	72014054	79	56	27	54
458242	chr3	72310003	72312584	AC112219.1	chr3	72142659	72153754	48	73	51	57.3333
458242	chr3	72310003	72312584	AC112219.1	chr3	72307422	72315615	695	473	311	493
458242	chr3	72310003	72312584	AC112219.1	chr3	72868267	72872737	63	34	25	40.6667
518713	chr4	77413695	77421053	AC112249.1	chr4	77410831	77423906	586	405	269	420
518713	chr4	77413695	77421053	AC112249.1	chr4	78128900	78140417	10	15	9	11.3333
518713	chr4	77413695	77421053	AC112249.1	chr4	78266890	78283990	13	10	4	9
451176	chr3	47642666	47648585	AC112512.1	chr3	47637711	47642564	298	161	188	215.667
484822	chr3	159941781	159946589	AC112641.1	chr3	159595289	159608022	22	14	22	19.3333
484822	chr3	159941781	159946589	AC112641.1	chr3	159936929	159938824	646	418	416	493.333
256227	chr15	93827543	93831528	AC112693.1	chr15	93831954	93841381	75	65	119	86.3333
256227	chr15	93827543	93831528	AC112693.1	chr15	94668751	94684269	2	3	3	2.66667
402407	chr2	238165570	238166755	AC112715.2	chr2	238158032	238163112	749	603	320	557.333
402407	chr2	238165570	238166755	AC112715.2	chr2	238323498	238338311	33	34	23	30
402461	chr2	238332414	238337544	AC112721.1	chr2	238072525	238083052	71	54	32	52.3333
402461	chr2	238332414	238337544	AC112721.1	chr2	238343967	238346755	482	413	310	401.667
792153	chrX	25224260	25224756	AC112778.1	chrX	25228732	25230177	89	58	31	59.3333
719735	chr8	42946616	42950941	AC113191.1	chr8	42952052	42960535	457	283	424	388
719735	chr8	42946616	42950941	AC113191.1	chr8	43294715	43303396	34	14	32	26.6667
719735	chr8	42946616	42950941	AC113191.1	chr8	43550285	43562597	17	17	6	13.3333
565619	chr5	34524205	34527732	AC114302.1	chr5	34523009	34533227	361	299	242	300.667
565619	chr5	34524205	34527732	AC114302.1	chr5	34673052	34682311	23	19	31	24.3333
565619	chr5	34524205	34527732	AC114302.1	chr5	34893786	34900347	81	22	28	43.6667
565619	chr5	34524205	34527732	AC114302.1	chr5	35318267	35332593	3	2	4	3
29638	chr1	107988292	107992191	AC114491.1	chr1	107992371	107997464	250	124	137	170.333
29638	chr1	107988292	107992191	AC114491.1	chr1	108290419	108295881	37	26	12	25
29664	chr1	108107960	108117229	AC114491.2	chr1	108101949	108105522	354	266	247	289
29664	chr1	108107960	108117229	AC114491.2	chr1	108672947	108681380	4	5	3	4
54405	chr1	215061912	215066242	AC114496.1	chr1	215056369	215058733	103	45	74	74
239795	chr15	35268876	35270916	AC114546.1	chr15	35266887	35268545	285	190	206	227
239795	chr15	35268876	35270916	AC114546.1	chr15	35728375	35742514	4	4	7	5
403356	chr2	242662180	242678739	AC114730.11	chr2	242679671	242684947	109	155	100	121.333
403369	chr2	242751360	242773821	AC114730.3	chr2	242774857	242775643	214	153	114	160.333
403367	chr2	242732593	242750635	AC114730.5	chr2	242773822	242774856	75	90	51	72
403360	chr2	242687424	242697786	AC114730.7	chr2	242679671	242684947	162	172	102	145.333
352615	chr2	69681751	69695641	AC114772.1	chr2	69698626	69702683	482	390	206	359.333
402812	chr2	239893547	239896559	AC114788.1	chr2	239897341	239897561	314	308	333	318.333
553156	chr4	183741759	183750195	AC114798.1	chr4	183750370	183757390	124	202	56	127.333
553156	chr4	183741759	183750195	AC114798.1	chr4	183993157	183995314	8	10	6	8
553156	chr4	183741759	183750195	AC114798.1	chr4	184171414	184180908	9	11	11	10.3333
332263	chr2	1060315	1064661	AC114808.3	chr2	1058457	1066416	440	400	453	431
332877	chr2	3486045	3506592	AC114810.5	chr2	3476674	3485249	20	39	22	27
445016	chr3	26792275	26802542	AC114877.1	chr3	26804274	26805716	302	300	223	275
568551	chr5	43185152	43196278	AC114947.1	chr5	43180409	43184686	67	55	53	58.3333
568551	chr5	43185152	43196278	AC114947.1	chr5	43386161	43393120	27	22	21	23.3333
7424	chr1	34640946	34643851	AC115286.1	chr1	34637702	34640428	244	265	221	243.333
448767	chr3	38944444	38951566	AC116038.1	chr3	38940475	38942365	112	73	84	89.6667
448724	chr3	38841385	38841899	AC116038.2	chr3	38842218	38842942	834	936	761	843.667
448724	chr3	38841385	38841899	AC116038.2	chr3	39361908	39378087	11	11	6	9.33333
735728	chr8	96689854	96691658	AC116154.1	chr8	96684256	96694707	51	44	43	46
577435	chr5	72449259	72453718	AC116345.1	chr5	72455865	72456323	29	16	28	24.3333
596348	chr5	131758776	131769186	AC116366.5	chr5	131586172	131599734	10	17	6	11
596357	chr5	131802698	131812303	AC116366.6	chr5	131814628	131819987	256	292	245	264.333
107092	chr11	17091057	17100015	AC116533.1	chr11	15841386	15841976	8	3	5	5.33333
107092	chr11	17091057	17100015	AC116533.1	chr11	16809899	16821083	50	40	25	38.3333
107092	chr11	17091057	17100015	AC116533.1	chr11	17100692	17115460	101	114	62	92.3333
107092	chr11	17091057	17100015	AC116533.1	chr11	17533516	17539687	5	7	9	7
267020	chr16	35115511	35139004	AC116553.1	chr16	35095962	35105222	43	26	20	29.6667
332229	chr2	940123	949577	AC116614.1	chr2	954226	954884	172	173	187	177.333
332229	chr2	940123	949577	AC116614.1	chr2	1553448	1556131	16	23	8	15.6667
473766	chr3	123780446	123789572	AC117401.1	chr3	123774796	123777562	280	368	221	289.667
473766	chr3	123780446	123789572	AC117401.1	chr3	124001682	124011965	16	33	12	20.3333
491683	chr3	181417166	181417570	AC117415.1	chr3	181047216	181052216	21	23	14	19.3333
491683	chr3	181417166	181417570	AC117415.1	chr3	181410766	181425122	186	230	239	218.333
491683	chr3	181417166	181417570	AC117415.1	chr3	181973063	181980301	23	15	11	16.3333
491683	chr3	181417166	181417570	AC117415.1	chr3	182395842	182401758	29	32	29	30
465027	chr3	96384810	96387175	AC117444.1	chr3	96378993	96381731	153	80	98	110.333
328553	chr19	40699298	40714988	AC118344.2	chr19	40694580	40696027	50	35	34	39.6667
351613	chr2	66464075	66469678	AC118345.1	chr2	66074616	66087706	13	15	10	12.6667
471204	chr3	115399992	115402594	AC119795.1	chr3	114084702	114099643	8	6	7	7
471204	chr3	115399992	115402594	AC119795.1	chr3	114548074	114560071	6	10	11	9
471204	chr3	115399992	115402594	AC119795.1	chr3	114814891	114833956	11	21	9	13.6667
471204	chr3	115399992	115402594	AC119795.1	chr3	114937056	114950399	32	27	16	25
471204	chr3	115399992	115402594	AC119795.1	chr3	115390566	115392020	235	180	178	197.667
727745	chr8	71482697	71503116	AC120194.1	chr8	71508116	71508285	117	58	72	82.3333
258991	chr16	1307583	1316144	AC120498.1	chr16	1325607	1340621	8	19	15	14
526472	chr4	101043625	101058516	AC121157.1	chr4	101059184	101062535	64	56	53	57.6667
475606	chr3	130826902	130837187	AC121332.1	chr3	130819029	130824394	189	94	78	120.333
475606	chr3	130826902	130837187	AC121332.1	chr3	131474954	131488762	3	3	3	3
153499	chr12	39829256	39837434	AC121334.1	chr12	39820022	39827033	185	152	124	153.667
153607	chr12	40199842	40205192	AC121336.1	chr12	40207519	40208088	53	30	45	42.6667
282869	chr17	17672846	17689360	AC122129.3	chr17	17698134	17699250	55	77	55	62.3333
396347	chr2	216741724	216744901	AC122136.1	chr2	216317374	216325294	8	12	9	9.66667
396347	chr2	216741724	216744901	AC122136.1	chr2	216739741	216741281	390	119	135	214.667
718766	chr8	39416581	39423158	AC123767.1	chr8	39413384	39413779	144	125	153	140.667
718766	chr8	39416581	39423158	AC123767.1	chr8	40069394	40086269	4	6	4	4.66667
676389	chr7	50411807	50412756	AC124014.1	chr7	50415143	50415515	387	302	347	345.333
676389	chr7	50411807	50412756	AC124014.1	chr7	50734821	50750608	4	7	3	4.66667
162079	chr12	69180877	69189302	AC124890.1	chr12	69173345	69176394	153	56	79	96
162079	chr12	69180877	69189302	AC124890.1	chr12	69643705	69657771	3	3	3	3
392370	chr2	204626738	204632016	AC125238.1	chr2	204639327	204640270	167	121	107	131.667
247930	chr15	62526730	62549847	AC126323.2	chr15	62518015	62521202	120	119	44	94.3333
247930	chr15	62526730	62549847	AC126323.2	chr15	62977784	62997251	6	6	2	4.66667
297302	chr17	78971085	78980823	AC127496.1	chr17	78980928	78981412	94	66	85	81.6667
297311	chr17	78997936	79010374	AC127496.3	chr17	79013530	79016605	79	123	87	96.3333
162203	chr12	69591231	69599811	AC127894.1	chr12	69588436	69589064	70	28	56	51.3333
280334	chr17	7977175	8003541	AC129492.6	chr17	7969230	7969570	27	42	35	34.6667
264357	chr16	23763840	23767231	AC130454.2	chr16	23769479	23772819	473	716	486	558.333
264357	chr16	23763840	23767231	AC130454.2	chr16	24041772	24047076	32	40	26	32.6667
264357	chr16	23763840	23767231	AC130454.2	chr16	24489762	24506800	14	15	13	14
273257	chr16	68089122	68097049	AC130462.1	chr16	68076397	68087371	75	78	25	59.3333
550880	chr4	176387041	176398020	AC131094.1	chr4	176401618	176404018	190	103	99	130.667
403380	chr2	242843557	242848582	AC131097.4	chr2	242830401	242836815	133	128	80	113.667
492276	chr3	183516859	183523613	AC131160.1	chr3	183175504	183190249	8	15	13	12
715909	chr8	29786004	29791167	AC131254.1	chr8	29794086	29794987	89	40	60	63
262911	chr16	18139993	18143004	AC131384.1	chr16	18143763	18151868	276	187	142	201.667
102863	chr11	3000649	3011328	AC131971.1	chr11	3016899	3022351	98	64	58	73.3333
102853	chr11	2965308	2972282	AC131971.3	chr11	2703495	2714645	9	12	6	9
102853	chr11	2965308	2972282	AC131971.3	chr11	2956184	2962789	427	298	322	349
274477	chr16	73016384	73022136	AC132068.1	chr16	72528019	72534216	31	22	17	23.3333
274477	chr16	73016384	73022136	AC132068.1	chr16	73008745	73013701	292	302	717	437
274477	chr16	73016384	73022136	AC132068.1	chr16	73225407	73230137	46	65	17	42.6667
272921	chr16	66519353	66529046	AC132186.2	chr16	66546867	66552064	103	114	79	98.6667
112443	chr11	33899900	33906435	AC132216.1	chr11	33907578	33913203	526	399	337	420.667
112443	chr11	33899900	33906435	AC132216.1	chr11	34444208	34459688	20	6	8	11.3333
387834	chr2	189955317	189968416	AC133106.2	chr2	190272043	190286657	33	16	23	24
278652	chr16	90110927	90116028	AC133919.6	chr16	90117572	90118434	814	881	535	743.333
719888	chr8	43414177	43418398	AC134698.1	chr8	43418841	43419655	165	222	147	178
280384	chr17	8257967	8263924	AC135178.1	chr17	8239040	8242057	284	191	157	210.667
280384	chr17	8257967	8263924	AC135178.1	chr17	8662325	8680723	19	11	11	13.6667
710906	chr8	12807448	12809754	AC135352.1	chr8	12599458	12609544	19	11	9	13
710906	chr8	12807448	12809754	AC135352.1	chr8	13082422	13099461	15	7	7	9.66667
710906	chr8	12807448	12809754	AC135352.1	chr8	13518072	13522090	11	11	5	9
710902	chr8	12800533	12804685	AC135352.2	chr8	12805189	12807242	472	146	201	273
710902	chr8	12800533	12804685	AC135352.2	chr8	13518072	13523279	11	9	12	10.6667
285044	chr17	29701174	29707014	AC135724.1	chr17	29709316	29710315	379	244	594	405.667
285044	chr17	29701174	29707014	AC135724.1	chr17	30177316	30189466	33	24	30	29
266793	chr16	34255114	34258726	AC135776.1	chr16	34265823	34266208	315	258	207	260
266793	chr16	34255114	34258726	AC135776.1	chr16	34869363	34886002	9	6	5	6.66667
443791	chr3	23241132	23244119	AC135966.1	chr3	23233940	23234948	89	39	53	60.3333
163768	chr12	74292225	74298847	AC136188.1	chr12	74283154	74291699	119	36	91	82
718830	chr8	39611518	39615112	AC136365.1	chr8	39619621	39622140	211	147	204	187.333
237583	chr15	27393597	27407391	AC136896.1	chr15	27409684	27411227	325	277	175	259
170146	chr12	93474916	93491944	AC138123.1	chr12	93776909	93790828	25	7	11	14.3333
288181	chr17	43306627	43324157	AC138150.4	chr17	43326206	43328870	179	255	155	196.333
749920	chr8	142519161	142530635	AC138647.1	chr8	142533079	142534409	253	347	171	257
162180	chr12	69506135	69511963	AC139931.1	chr12	69501048	69503971	190	213	208	203.667
561665	chr5	21733658	21735868	AC140132.1	chr5	21729702	21738946	30	37	14	27
518109	chr4	75513396	75516680	AC142293.3	chr4	75231523	75242057	15	15	21	17
518109	chr4	75513396	75516680	AC142293.3	chr4	75508460	75513147	284	170	166	206.667
332882	chr2	3517384	3523883	AC142528.1	chr2	2698837	2700734	10	5	8	7.66667
375142	chr2	150438437	150444007	AC144449.1	chr2	149873142	149885437	16	9	10	11.6667
375142	chr2	150438437	150444007	AC144449.1	chr2	150009910	150020271	6	5	13	8
375142	chr2	150438437	150444007	AC144449.1	chr2	150435555	150438121	192	109	176	159
375142	chr2	150438437	150444007	AC144449.1	chr2	150715550	150728315	5	6	5	5.33333
375142	chr2	150438437	150444007	AC144449.1	chr2	151336012	151340959	17	18	18	17.6667
375142	chr2	150438437	150444007	AC144449.1	chr2	151762031	151771711	8	5	6	6.33333
332394	chr2	1603355	1625382	AC144450.1	chr2	1629935	1633376	180	229	80	163
175312	chr12	111066104	111084198	AC144522.1	chr12	111094654	111095755	130	148	92	123.333
175312	chr12	111066104	111084198	AC144522.1	chr12	111647221	111664543	5	3	3	3.66667
750104	chr8	143713402	143721423	AC145123.2	chr8	144067939	144071311	20	19	13	17.3333
661852	chr7	228327	300135	AC145676.2	chr7	214397	222227	50	45	29	41.3333
661852	chr7	228327	300135	AC145676.2	chr7	814534	828538	5	12	8	8.33333
661901	chr7	635611	645253	AC147651.4	chr7	366876	370868	12	23	14	16.3333
661901	chr7	635611	645253	AC147651.4	chr7	627766	632358	96	136	73	101.667
661897	chr7	592862	604074	AC147651.5	chr7	627766	632358	19	55	15	29.6667
174989	chr12	109423896	109436516	AC190387.1	chr12	109355383	109367923	8	6	15	9.66667
288305	chr17	43919210	43926368	AC217771.1	chr17	43706838	43713506	80	116	57	84.3333
350892	chr2	64104232	64112794	ACA59.1	chr2	63914323	63919847	28	11	25	21.3333
350892	chr2	64104232	64112794	ACA59.1	chr2	64100307	64103426	180	127	159	155.333
384599	chr2	179886965	179893096	ACA59.2	chr2	179660541	179666571	39	17	14	23.3333
384599	chr2	179886965	179893096	ACA59.2	chr2	179894402	179896296	687	344	430	487
261414	chr16	12389969	12395540	ACA64.1	chr16	12396786	12398066	919	703	532	718
261414	chr16	12389969	12395540	ACA64.1	chr16	12654103	12665557	15	12	11	12.6667
807565	chrX	80101741	80119843	ACA64.4	chrX	80365893	80383130	5	2	3	3.33333
809917	chrX	87399841	87404097	ACA64.5	chrX	87398324	87399455	146	121	129	132
448541	chr3	38172857	38183749	ACAA1	chr3	37562352	37582202	4	3	2	3
448541	chr3	38172857	38183749	ACAA1	chr3	38169828	38170452	246	220	158	208
448541	chr3	38172857	38183749	ACAA1	chr3	38513114	38524566	13	13	10	12
311213	chr18	47339155	47341273	ACAA2	chr18	47020199	47030679	96	71	90	85.6667
311213	chr18	47339155	47341273	ACAA2	chr18	47336580	47349099	1119	522	362	667.667
311213	chr18	47339155	47341273	ACAA2	chr18	47796365	47799465	24	20	9	17.6667
286629	chr17	35760663	35771365	ACACA	chr17	35780172	35780940	294	234	179	235.667
175013	chr12	109547886	109559654	ACACB	chr12	109568963	109573313	15	18	15	16
476133	chr3	132377167	132380058	ACAD11	chr3	132252559	132259525	115	106	83	101.333
476133	chr3	132377167	132380058	ACAD11	chr3	132384636	132385478	395	304	278	325.667
475027	chr3	128591280	128602186	ACAD9	chr3	128573555	128574568	60	46	38	48
394427	chr2	211086927	211091873	ACADL	chr2	210831030	210836776	34	26	34	31.3333
394427	chr2	211086927	211091873	ACADL	chr2	211096523	211099810	224	160	139	174.333
177815	chr12	121162947	121185293	ACADS	chr12	121149783	121158544	264	246	161	223.667
280191	chr17	7114907	7125387	ACADVL	chr17	7131682	7133291	456	572	321	449.667
255103	chr15	89345586	89351106	ACAN	chr15	89341277	89342888	164	224	188	192
280205	chr17	7238218	7247884	ACAP1	chr17	6928808	6942623	24	49	34	35.6667
495785	chr3	195162417	195166617	ACAP2	chr3	194388836	194392912	11	12	10	11
495785	chr3	195162417	195166617	ACAP2	chr3	195154264	195161326	631	569	282	494
133868	chr11	107982760	107992465	ACAT1	chr11	107975842	107981000	625	426	292	447.667
133868	chr11	107982760	107992465	ACAT1	chr11	108163157	108170701	23	27	23	24.3333
133868	chr11	107982760	107992465	ACAT1	chr11	108524330	108526967	16	28	15	19.6667
658650	chr6	160181052	160182218	ACAT2	chr6	160167471	160172762	285	225	256	255.333
658650	chr6	160181052	160182218	ACAT2	chr6	160369358	160373598	18	32	15	21.6667
658650	chr6	160181052	160182218	ACAT2	chr6	160481475	160491289	11	20	4	11.6667
57891	chr1	226364150	226376557	ACBD3	chr1	226377433	226384835	411	202	254	289
44154	chr1	180471076	180472609	ACBD6	chr1	180210059	180226408	50	55	24	43
44154	chr1	180471076	180472609	ACBD6	chr1	180474225	180475113	944	604	499	682.333
44154	chr1	180471076	180472609	ACBD6	chr1	180828529	180843379	66	72	49	62.3333
44154	chr1	180471076	180472609	ACBD6	chr1	181119885	181130676	41	52	28	40.3333
68596	chr10	15129208	15136019	ACBD7	chr10	14230953	14243186	14	7	3	8
68596	chr10	15129208	15136019	ACBD7	chr10	15115866	15117168	289	230	161	226.667
285779	chr17	32480180	32487023	ACCN1	chr17	32106462	32108258	141	141	82	121.333
285779	chr17	32480180	32487023	ACCN1	chr17	32251899	32262775	80	38	15	44.3333
285779	chr17	32480180	32487023	ACCN1	chr17	32476548	32478654	753	657	426	612
156659	chr12	50443134	50452299	ACCN2	chr12	50454032	50458972	182	248	171	200.333
397305	chr2	220371494	220383596	ACCN4	chr2	220332834	220336206	62	99	43	68
544517	chr4	156786207	156789057	ACCN5	chr4	156321611	156341595	4	4	4	4
544517	chr4	156786207	156789057	ACCN5	chr4	156780779	156794671	116	55	50	73.6667
115636	chr11	44087024	44098121	ACCS	chr11	44098674	44113185	116	138	96	116.667
115636	chr11	44087024	44098121	ACCS	chr11	44896878	44913513	2	2	2	2
115628	chr11	44068373	44071468	ACCSL	chr11	43903447	43915645	54	60	40	51.3333
115628	chr11	44068373	44071468	ACCSL	chr11	44062384	44065298	445	309	319	357.667
273170	chr16	67684481	67698216	ACD	chr16	67672322	67674057	253	246	139	212.667
293068	chr17	61548609	61558823	ACE	chr17	60734345	60748337	6	12	5	7.66667
293068	chr17	61548609	61558823	ACE	chr17	61524925	61538321	144	155	92	130.333
789319	chrX	15618031	15622794	ACE2	chrX	15613029	15617168	326	173	202	233.667
123873	chr11	76566181	76584526	ACER3	chr11	76584621	76591276	473	233	232	312.667
211384	chr14	23564580	23570049	ACIN1	chr14	22890584	22901751	11	6	4	7
211384	chr14	23564580	23570049	ACIN1	chr14	23018614	23021260	14	8	7	9.66667
370315	chr2	135596054	135596900	ACMSD	chr2	134851707	134865679	7	5	4	5.33333
370315	chr2	135596054	135596900	ACMSD	chr2	135317642	135324524	34	41	21	32
370315	chr2	135596054	135596900	ACMSD	chr2	135589702	135606272	609	406	696	570.333
689404	chr7	96743050	96746650	ACN9	chr7	95399007	95409010	10	6	7	7.66667
689404	chr7	96743050	96746650	ACN9	chr7	96322506	96330341	13	14	12	13
689404	chr7	96743050	96746650	ACN9	chr7	96462605	96469201	17	9	6	10.6667
689404	chr7	96743050	96746650	ACN9	chr7	96757625	96761066	137	80	94	103.667
689404	chr7	96743050	96746650	ACN9	chr7	97055562	97068927	12	10	8	10
689404	chr7	96743050	96746650	ACN9	chr7	97476503	97477076	39	36	24	33
760862	chr9	32382623	32396972	ACO1	chr9	32556326	32572016	47	40	23	36.6667
760862	chr9	32382623	32396972	ACO1	chr9	32972466	32984455	24	15	19	19.3333
434973	chr22	41864756	41866344	ACO2	chr22	41860671	41869116	1686	441	1031	1052.67
12664	chr1	55000713	55017339	ACOT11	chr1	55023640	55025979	12	11	15	12.6667
579934	chr5	80686668	80693147	ACOT12	chr5	80695265	80698250	295	187	175	219
579934	chr5	80686668	80693147	ACOT12	chr5	81050083	81066134	12	4	7	7.66667
791762	chrX	23759553	23804082	ACOT9	chrX	23919869	23922073	52	24	17	31
453894	chr3	58521219	58523884	ACOX2	chr3	58510841	58511244	150	178	92	140
453894	chr3	58521219	58523884	ACOX2	chr3	59408106	59410376	5	5	4	4.66667
498219	chr4	8441319	8455074	ACOX3	chr4	8469685	8481969	59	47	23	43
363233	chr2	111488837	111492524	ACOXL	chr2	111493412	111495462	626	452	417	498.333
332065	chr2	262406	274455	ACP1	chr2	261892	262247	242	119	137	166
322057	chr19	11685539	11691178	ACP5	chr19	11670327	11682470	69	79	65	71
34692	chr1	147138865	147143119	ACP6	chr1	146977119	146992722	32	21	14	22.3333
34692	chr1	147138865	147143119	ACP6	chr1	147138009	147138770	451	257	247	318.333
34692	chr1	147138865	147143119	ACP6	chr1	147357249	147365064	57	48	34	46.3333
478658	chr3	140945205	140948298	ACPL2	chr3	140954294	140955409	143	106	114	121
478658	chr3	140945205	140948298	ACPL2	chr3	141160068	141161919	20	11	9	13.3333
476015	chr3	132028649	132048569	ACPP	chr3	132049872	132056476	262	116	126	168
476015	chr3	132028649	132048569	ACPP	chr3	132408825	132427237	2	6	2	3.33333
804890	chrX	70795538	70801743	ACRC	chrX	70782235	70786089	115	76	58	83
804890	chrX	70795538	70801743	ACRC	chrX	71422276	71437552	5	3	3	3.66667
138900	chr11	125550752	125552321	ACRV1	chr11	125552385	125553682	57	61	72	63.3333
252179	chr15	78498248	78537992	ACSBG1	chr15	78488049	78494869	49	37	21	35.6667
321232	chr19	6126548	6136182	ACSBG2	chr19	6117942	6120225	310	249	226	261.667
321232	chr19	6126548	6136182	ACSBG2	chr19	6296719	6313622	100	44	24	56
289407	chr17	48499931	48505215	ACSF2	chr17	48506623	48525250	121	93	318	177.333
278485	chr16	89154236	89165493	ACSF3	chr16	89165897	89175808	82	109	79	90
553738	chr4	185746200	185769431	ACSL1	chr4	185771069	185771920	540	442	295	425.667
398337	chr2	223725185	223727564	ACSL3	chr2	223274032	223293887	12	4	7	7.66667
398337	chr2	223725185	223727564	ACSL3	chr2	223564963	223580367	66	14	48	42.6667
398337	chr2	223725185	223727564	ACSL3	chr2	223728226	223729875	276	195	218	229.667
96589	chr10	114130957	114134676	ACSL5	chr10	113942215	113954408	14	7	5	8.66667
96589	chr10	114130957	114134676	ACSL5	chr10	114135171	114139581	86	88	58	77.3333
263559	chr16	20708093	20710422	ACSM1	chr16	20127259	20145077	6	5	4	5
263559	chr16	20708093	20710422	ACSM1	chr16	20394389	20403851	39	25	17	27
263559	chr16	20708093	20710422	ACSM1	chr16	20707123	20707676	886	839	603	776
263577	chr16	20775177	20776937	ACSM3	chr16	20779785	20781339	318	225	231	258
143647	chr12	7455402	7459564	ACSM4	chr12	7459871	7460634	489	351	325	388.333
143647	chr12	7455402	7459564	ACSM4	chr12	7606688	7608256	38	28	19	28.3333
410693	chr20	25036380	25043735	ACSS1	chr20	25015053	25026142	310	227	152	229.667
410693	chr20	25036380	25043735	ACSS1	chr20	25184706	25191698	48	50	46	48
410693	chr20	25036380	25043735	ACSS1	chr20	25526978	25532443	7	10	6	7.66667
411846	chr20	33452578	33468129	ACSS2	chr20	33469650	33470764	112	50	63	75
58667	chr1	229562492	229571968	ACTA1	chr1	228785399	228800703	17	25	14	18.6667
58667	chr1	229562492	229571968	ACTA1	chr1	229558678	229578071	381	255	275	303.667
89679	chr10	90751013	90752197	ACTA2	chr10	90334152	90340303	13	11	8	10.6667
89679	chr10	90751013	90752197	ACTA2	chr10	90755697	90756761	634	422	370	475.333
89679	chr10	90751013	90752197	ACTA2	chr10	90975535	90988192	45	63	51	53
89679	chr10	90751013	90752197	ACTA2	chr10	91322414	91332607	5	6	12	7.66667
572382	chr5	56777073	56779944	ACTBL2	chr5	56616398	56628112	31	51	19	33.6667
572382	chr5	56777073	56779944	ACTBL2	chr5	56780341	56780754	388	317	311	338.667
572382	chr5	56777073	56779944	ACTBL2	chr5	57757253	57761930	25	21	15	20.3333
572382	chr5	56777073	56779944	ACTBL2	chr5	58137354	58148146	9	7	5	7
239739	chr15	35080552	35095671	ACTC1	chr15	35074568	35077713	176	163	120	153
297383	chr17	79477581	79481510	ACTG1	chr17	79458958	79476197	74	76	56	68.6667
353783	chr2	74117980	74121856	ACTG2	chr2	74318174	74330102	59	18	33	36.6667
353783	chr2	74117980	74121856	ACTG2	chr2	74855454	74872129	5	8	4	5.66667
491008	chr3	179278890	179288214	ACTL6A	chr3	179133750	179136883	34	9	9	17.3333
491008	chr3	179278890	179288214	ACTL6A	chr3	179289235	179290116	277	129	157	187.667
690260	chr7	100242483	100267766	ACTL6B	chr7	100213972	100217075	15	15	7	12.3333
778003	chr9	111622012	111628859	ACTL7A	chr9	111631182	111644413	446	133	264	281
778002	chr9	111613777	111622011	ACTL7B	chr9	111628860	111631181	286	247	227	253.333
3783	chr1	18080410	18082292	ACTL8	chr1	18089207	18090853	109	146	82	112.333
225567	chr14	69434104	69448752	ACTN1	chr14	69428681	69433373	131	214	132	159
60733	chr1	236840537	236853707	ACTN2	chr1	236833292	236838968	367	332	256	318.333
93543	chr10	104261258	104262550	ACTR1A	chr10	103987577	103997527	27	16	31	24.6667
93543	chr10	104261258	104262550	ACTR1A	chr10	104257768	104261099	658	443	369	490
359466	chr2	98279112	98286492	ACTR1B	chr2	98286925	98290285	524	336	386	415.333
351318	chr2	65452489	65459470	ACTR2	chr2	65463141	65466251	267	150	132	183
351318	chr2	65452489	65459470	ACTR2	chr2	65655338	65662825	46	20	29	31.6667
351318	chr2	65452489	65459470	ACTR2	chr2	65772001	65788802	34	16	21	23.6667
364107	chr2	114645986	114651473	ACTR3	chr2	114643069	114644385	901	448	421	590
705599	chr7	152450889	152457916	ACTR3B	chr7	152444176	152459327	921	257	560	579.333
412705	chr20	37372292	37382197	ACTR5	chr20	37386285	37388254	12	7	10	9.66667
172361	chr12	100584952	100596174	ACTR6	chr12	100576329	100579803	225	179	158	187.333
172361	chr12	100584952	100596174	ACTR6	chr12	100957065	100962648	38	23	11	24
452582	chr3	53915522	53924632	ACTR8	chr3	53377292	53391921	25	11	22	19.3333
452582	chr3	53915522	53924632	ACTR8	chr3	53924647	53925185	782	436	421	546.333
452582	chr3	53915522	53924632	ACTR8	chr3	55017445	55036652	7	8	8	7.66667
487	chr1	2927637	2944794	ACTRT2	chr1	2923852	2925227	363	532	272	389
487	chr1	2927637	2944794	ACTRT2	chr1	3338276	3343969	54	156	72	94
377870	chr2	158732161	158733757	ACVR1	chr2	158159175	158177589	16	8	8	10.6667
377870	chr2	158732161	158733757	ACVR1	chr2	158734287	158749770	232	115	153	166.667
377870	chr2	158732161	158733757	ACVR1	chr2	158860616	158867598	85	62	50	65.6667
377870	chr2	158732161	158733757	ACVR1	chr2	159609795	159619559	8	8	6	7.33333
377790	chr2	158474399	158485896	ACVR1C	chr2	158162013	158173218	25	16	16	19
377790	chr2	158474399	158485896	ACVR1C	chr2	158487433	158495006	357	85	228	223.333
377790	chr2	158474399	158485896	ACVR1C	chr2	158865663	158870328	12	8	7	9
374564	chr2	148599900	148603822	ACVR2A	chr2	147828838	147844463	25	21	21	22.3333
374564	chr2	148599900	148603822	ACVR2A	chr2	148303729	148317907	44	22	14	26.6667
374564	chr2	148599900	148603822	ACVR2A	chr2	148392493	148401273	96	35	55	62
374564	chr2	148599900	148603822	ACVR2A	chr2	148591698	148597634	274	298	172	248
448626	chr3	38487578	38496689	ACVR2B	chr3	38501422	38513113	33	59	45	45.6667
157074	chr12	52283133	52306764	ACVRL1	chr12	52370789	52375307	54	62	31	49
121775	chr11	67417569	67429735	ACY3	chr11	67431098	67438454	139	182	119	146.667
227286	chr14	75534123	75537115	ACYP1	chr14	75530876	75532729	1169	614	625	802.667
347868	chr2	54339451	54349206	ACYP2	chr2	54334493	54335154	594	461	355	470
327676	chr19	36065800	36067544	AD000090.1	chr19	36061677	36064671	104	106	91	100.333
327667	chr19	36033658	36039398	AD000090.2	chr19	36041759	36046958	206	276	179	220.333
327701	chr19	36204880	36219241	AD000671.1	chr19	36189643	36200395	168	226	96	163.333
414361	chr20	43276192	43283807	ADA	chr20	43283892	43290243	434	291	348	357.667
533728	chr4	123295978	123300136	ADAD1	chr4	122835863	122845294	5	5	5	5
533728	chr4	123295978	123300136	ADAD1	chr4	123311272	123319058	60	44	40	48
533728	chr4	123295978	123300136	ADAD1	chr4	123783958	123798012	6	4	6	5.33333
246874	chr15	59040631	59042709	ADAM10	chr15	58529465	58544230	38	78	25	47
246874	chr15	59040631	59042709	ADAM10	chr15	58805368	58818237	88	53	51	64
246874	chr15	59040631	59042709	ADAM10	chr15	59031273	59038284	483	281	472	412
246874	chr15	59040631	59042709	ADAM10	chr15	59796285	59812189	10	9	7	8.66667
288124	chr17	42832618	42839130	ADAM11	chr17	42827706	42832205	67	120	84	90.3333
100589	chr10	128070588	128077489	ADAM12	chr10	127664651	127672882	33	44	36	37.6667
100589	chr10	128070588	128077489	ADAM12	chr10	127851139	127866812	23	13	14	16.6667
[truncated: 29,099 more rows]
