# Supplementary material for: ChiCMaxima: a robust and simple pipeline for detection and visualization of chromatin looping in Capture Hi-C
Source: Genome Biol. 2019 May 22;20:102. doi: 10.1186/s13059-019-1706-3 (PMC6532271; doi:10.1186/s13059-019-1706-3)
Supplement: Supplementary file 9 — Table S8. List of human M2 macrophage interactions called by ChiCMaxima from three CHi-C replicates. (XLSX 2433 kb) [file 13059_2019_1706_MOESM9_ESM.xlsx]

## Sheet: S8 - M2 CHi-C
Table S8. List of human M2 macrophage interactions called by ChiCMaxima from three CHi-C replicates
ID_Bait	chr_Bait	start_Bait	end_Bait	Bait_name	chr_OE	start_OE	end_OE	N.1	N.2	N.3	N.mean
78445	chr10	52641291	52645702	A1CF	chr10	52637257	52639333	174	102	74	116.667
78445	chr10	52641291	52645702	A1CF	chr10	53745036	53747043	6	3	4	4.33333
206254	chr13	101241374	101243366	A2LD1	chr13	100541290	100557399	16	10	7	11
206254	chr13	101241374	101243366	A2LD1	chr13	101247558	101252016	722	292	213	409
206254	chr13	101241374	101243366	A2LD1	chr13	101776116	101780725	19	15	8	14
144108	chr12	9268746	9269882	A2M	chr12	9272082	9279207	201	244	143	196
144042	chr12	8983123	8986825	A2ML1-AS1	chr12	8993917	9001634	403	413	179	331.667
144042	chr12	8983123	8986825	A2ML1-AS1	chr12	9189134	9208759	48	36	17	33.6667
144039	chr12	8972319	8975489	A2ML1-AS2	chr12	8986826	9001634	102	188	107	132.333
435232	chr22	43104727	43123445	A4GALT	chr22	43138227	43140604	40	39	32	37
157379	chr12	53718188	53721565	AAAS	chr12	53732141	53734417	506	298	228	344
178672	chr12	125541824	125553041	AACS	chr12	125535648	125541134	341	253	141	245
482073	chr3	151521668	151531842	AADAC	chr3	151174228	151185966	17	26	15	19.3333
482073	chr3	151521668	151531842	AADAC	chr3	151516955	151534849	250	170	49	156.333
2535	chr1	12773296	12776419	AADACL3	chr1	12764532	12770050	108	62	43	71
2518	chr1	12700924	12716452	AADACL4	chr1	12691644	12696496	143	94	67	101.333
549068	chr4	171010864	171015572	AADAT	chr4	170720960	170739159	48	16	8	24
549068	chr4	171010864	171015572	AADAT	chr4	171005946	171009144	566	279	139	328
397048	chr2	219134749	219135860	AAMP	chr2	218651388	218663557	14	8	7	9.66667
397048	chr2	219134749	219135860	AAMP	chr2	219159968	219161124	280	195	120	198.333
273743	chr16	70313654	70325070	AARS	chr16	70331538	70332963	1177	862	338	792.333
622804	chr6	44279450	44288287	AARS2	chr6	44272756	44275687	530	324	246	366.667
287787	chr17	41128312	41133939	AARSD1	chr17	41121005	41127488	178	172	96	148.667
512394	chr4	57252367	57255776	AASDH	chr4	57248161	57250022	1438	1020	263	907
133220	chr11	105941458	105949844	AASDHPPT	chr11	106908333	106911632	10	7	6	7.66667
696784	chr7	121780190	121788483	AASS	chr7	121794760	121795919	263	186	65	171.333
696784	chr7	121780190	121788483	AASS	chr7	122168314	122174375	6	21	5	10.6667
297335	chr17	79137855	79146085	AATK-AS1	chr17	79146249	79161257	90	36	48	58
235738	chr14	106650092	106664716	AB019440.1	chr14	106665101	106667311	224	224	124	190.667
260602	chr16	8757589	8780880	ABAT	chr16	8782154	8782995	212	214	113	179.667
143599	chr12	7260342	7262367	ABC12-49244600F4.3	chr12	7254411	7256158	876	550	306	577.333
143599	chr12	7260342	7262367	ABC12-49244600F4.3	chr12	7783245	7790687	15	18	7	13.3333
776826	chr9	107684509	107694252	ABCA1	chr9	107680051	107683097	516	378	137	343.667
776826	chr9	107684509	107694252	ABCA1	chr9	107909741	107920433	37	30	16	27.6667
776826	chr9	107684509	107694252	ABCA1	chr9	108173830	108182836	27	15	19	20.3333
294576	chr17	67240575	67245534	ABCA10	chr17	66441761	66460120	8	5	6	6.33333
294576	chr17	67240575	67245534	ABCA10	chr17	66532321	66547738	11	10	8	9.66667
294576	chr17	67240575	67245534	ABCA10	chr17	66768261	66772891	148	97	47	97.3333
294576	chr17	67240575	67245534	ABCA10	chr17	67052229	67062537	57	33	11	33.6667
294576	chr17	67240575	67245534	ABCA10	chr17	67237706	67249550	332	188	90	203.333
396091	chr2	215996772	216005331	ABCA12	chr2	215606884	215626458	6	4	3	4.33333
396091	chr2	215996772	216005331	ABCA12	chr2	216010023	216012222	245	200	101	182
675711	chr7	48205362	48213863	ABCA13	chr7	48920206	48927189	13	10	2	8.33333
259131	chr16	2388413	2395050	ABCA3	chr16	2401646	2406104	499	316	162	325.667
25311	chr1	94584058	94587741	ABCA4	chr1	94576598	94581355	546	136	115	265.667
294607	chr17	67321593	67325780	ABCA5	chr17	66768261	66768419	13	6	7	8.66667
294607	chr17	67321593	67325780	ABCA5	chr17	66902070	66920628	8	9	3	6.66667
294607	chr17	67321593	67325780	ABCA5	chr17	67316605	67320760	503	248	122	291
294547	chr17	67137035	67148210	ABCA6	chr17	66772892	66775416	35	38	6	26.3333
294547	chr17	67137035	67148210	ABCA6	chr17	67149791	67150049	857	606	351	604.667
294502	chr17	66946677	66957316	ABCA8	chr17	66940902	66945724	159	79	34	90.6667
294502	chr17	66946677	66957316	ABCA8	chr17	67234445	67237705	39	19	15	24.3333
294525	chr17	67053971	67060673	ABCA9	chr17	66768261	66768803	115	89	43	82.3333
294525	chr17	67053971	67060673	ABCA9	chr17	67219625	67237705	69	130	14	71
294512	chr17	66999518	67013082	ABCA9-AS1	chr17	67015388	67019844	126	75	76	92.3333
58705	chr1	229692817	229697283	ABCB10	chr1	228785399	228800703	24	24	5	17.6667
381459	chr2	169881986	169889602	ABCB11	chr2	169879977	169890664	1232	793	330	785
686356	chr7	87109481	87112603	ABCB4	chr7	87119633	87125753	168	128	49	115
667588	chr7	20639530	20655362	ABCB5	chr7	19784573	19794154	42	30	27	33
667588	chr7	20639530	20655362	ABCB5	chr7	20025610	20031350	35	22	13	23.3333
667588	chr7	20639530	20655362	ABCB5	chr7	20193925	20209904	15	14	6	11.6667
667588	chr7	20639530	20655362	ABCB5	chr7	20363658	20367313	11	19	8	12.6667
667588	chr7	20639530	20655362	ABCB5	chr7	20655503	20661691	66	74	40	60
397249	chr2	220077689	220091102	ABCB6	chr2	219908350	219924072	10	12	12	11.3333
267603	chr16	48189744	48200897	ABCC12	chr16	47166493	47184281	14	4	13	10.3333
267603	chr16	48189744	48200897	ABCC12	chr16	48189342	48189720	178	43	90	103.667
92879	chr10	101526826	101552246	ABCC2	chr10	101556338	101557602	366	247	100	237.667
204753	chr13	95951787	95955271	ABCC4	chr13	95959827	95960170	304	259	138	233.667
492332	chr3	183733408	183737933	ABCC5	chr3	183729356	183731411	976	609	196	593.667
492325	chr3	183724060	183724316	ABCC5-AS1	chr3	183255392	183266195	16	14	9	13
492325	chr3	183724060	183724316	ABCC5-AS1	chr3	183725921	183731411	1045	388	612	681.667
107204	chr11	17490949	17499574	ABCC8	chr11	17261472	17264336	28	24	15	22.3333
148149	chr12	22090571	22104163	ABCC9	chr12	22084772	22089783	213	134	39	128.667
153554	chr12	40010935	40014886	ABCD2	chr12	40005682	40016488	344	227	110	227
153554	chr12	40010935	40014886	ABCD2	chr12	40398517	40414897	9	17	7	11
25405	chr1	94876094	94886259	ABCD3	chr1	94872649	94875510	230	174	54	152.667
25405	chr1	94876094	94886259	ABCD3	chr1	95263820	95277733	28	31	8	22.3333
227087	chr14	74768726	74798920	ABCD4	chr14	74763705	74765410	241	176	70	162.333
541105	chr4	146015816	146020399	ABCE1	chr4	145253071	145268093	19	19	6	14.6667
541105	chr4	146015816	146020399	ABCE1	chr4	146444480	146445459	19	13	6	12.6667
541105	chr4	146015816	146020399	ABCE1	chr4	147013934	147029876	6	15	8	9.66667
541105	chr4	146015816	146020399	ABCE1	chr4	147203667	147215382	19	9	5	11
492370	chr3	183902355	183908534	ABCF3	chr3	183887526	183892123	11	7	12	10
428379	chr21	43607927	43629023	ABCG1	chr21	43344977	43350008	17	9	7	11
428379	chr21	43607927	43629023	ABCG1	chr21	43865187	43882275	24	26	10	20
522588	chr4	89150699	89153356	ABCG2	chr4	89148888	89150231	411	316	86	271
522588	chr4	89150699	89153356	ABCG2	chr4	89420731	89430018	43	36	26	35
137048	chr11	119008735	119023006	ABCG4	chr11	119004390	119005164	488	360	207	351.667
344667	chr2	44064966	44069810	ABCG5	chr2	44057255	44070326	492	490	305	429
344667	chr2	44064966	44069810	ABCG5	chr2	44522734	44522910	5	6	9	6.66667
339740	chr2	27346267	27348910	ABHD1	chr2	27351752	27355885	218	74	98	130
470002	chr3	111695488	111699177	ABHD10	chr3	111434773	111437991	129	105	59	97.6667
470002	chr3	111695488	111699177	ABHD10	chr3	111693619	111704349	1129	621	189	646.333
470002	chr3	111695488	111699177	ABHD10	chr3	112259782	112279411	22	8	3	11
410775	chr20	25366671	25376452	ABHD12	chr20	25354440	25359281	73	38	16	42.3333
220028	chr14	51338682	51347442	ABHD12B	chr14	51069063	51076754	13	24	8	15
220028	chr14	51338682	51347442	ABHD12B	chr14	51359143	51364733	107	88	36	77
255166	chr15	89621638	89633335	ABHD2	chr15	89615148	89616023	375	367	110	284
211271	chr14	23062238	23067559	ABHD4	chr14	23057021	23057695	180	55	105	113.333
450170	chr3	43724212	43735506	ABHD5	chr3	43737595	43737896	266	153	138	185.667
72175	chr10	27148168	27151789	ABI1	chr10	27018727	27022062	80	41	21	47.3333
289143	chr17	47286829	47292714	ABI3	chr17	47277724	47278133	259	205	231	231.667
466450	chr3	100709288	100714790	ABI3BP	chr3	100707589	100716522	368	288	86	247.333
783706	chr9	133576743	133589751	ABL1	chr9	132600149	132605345	6	4	3	4.33333
783706	chr9	133576743	133589751	ABL1	chr9	133572319	133574272	843	779	303	641.667
783706	chr9	133576743	133589751	ABL1	chr9	133737675	133745825	207	196	96	166.333
43789	chr1	179196747	179205715	ABL2	chr1	179212634	179216318	132	98	36	88.6667
97255	chr10	116442134	116447410	ABLIM1	chr10	116447894	116448243	550	384	205	379.667
601171	chr5	148520758	148526858	ABLIM3	chr5	148514266	148516319	385	241	107	244.333
705148	chr7	150512976	150523919	ABP1	chr7	150531544	150544096	365	241	94	233.333
618422	chr6	26593067	26601342	ABT1	chr6	26331308	26336825	38	48	21	35.6667
618422	chr6	26593067	26601342	ABT1	chr6	26584297	26592477	540	303	135	326
618422	chr6	26593067	26601342	ABT1	chr6	27048455	27063531	21	23	14	19.3333
618422	chr6	26593067	26601342	ABT1	chr6	27442285	27455330	8	9	3	6.66667
474738	chr3	127388664	127399743	ABTB1	chr3	127377634	127381578	262	200	148	203.333
474738	chr3	127388664	127399743	ABTB1	chr3	127678848	127688403	39	34	29	34
112583	chr11	34376256	34385647	ABTB2	chr11	34191423	34202435	181	201	89	157
112583	chr11	34376256	34385647	ABTB2	chr11	34370219	34374832	500	437	216	384.333
112583	chr11	34376256	34385647	ABTB2	chr11	34484738	34490691	248	207	82	179
280782	chr17	9972695	9976981	AC000003.1	chr17	9978733	9989981	645	595	223	487.667
280782	chr17	9972695	9976981	AC000003.1	chr17	10514856	10531759	5	7	9	7
430734	chr22	23476911	23481106	AC000029.1	chr22	23300832	23302691	8	7	10	8.33333
432240	chr22	29869289	29877404	AC000035.3	chr22	29867494	29868297	285	131	79	165
698469	chr7	126848723	126855584	AC000099.1	chr7	126843445	126862996	467	453	120	346.667
695317	chr7	117203158	117205915	AC000111.3	chr7	117199881	117211552	552	227	142	307
695349	chr7	117286445	117296105	AC000111.6	chr7	117274955	117283514	163	53	67	94.3333
698507	chr7	126990132	126991379	AC000123.4	chr7	126437177	126453119	12	16	4	10.6667
698507	chr7	126990132	126991379	AC000123.4	chr7	126995294	127002199	428	301	214	314.333
698178	chr7	126018517	126019314	AC000370.2	chr7	126019574	126025751	474	284	303	353.667
687229	chr7	89899258	89899670	AC002064.4	chr7	89894613	89906202	486	341	216	347.667
687229	chr7	89899258	89899670	AC002064.4	chr7	90052561	90060542	38	39	17	31.3333
687229	chr7	89899258	89899670	AC002064.4	chr7	90656867	90658373	4	2	3	3
177557	chr12	120017868	120022164	AC002070.1	chr12	120023095	120030686	259	198	130	195.667
688395	chr7	93518811	93526004	AC002076.10	chr7	93516907	93528212	345	293	92	243.333
688395	chr7	93518811	93526004	AC002076.10	chr7	93721355	93724512	71	54	34	53
688395	chr7	93518811	93526004	AC002076.10	chr7	94030562	94031859	24	30	14	22.6667
327690	chr19	36163037	36165455	AC002115.7	chr19	36177426	36183560	63	59	31	51
265933	chr16	30583431	30599062	AC002310.7	chr16	30603111	30610554	122	37	65	74.6667
265135	chr16	26655086	26667187	AC002331.1	chr16	26670393	26670939	181	141	87	136.333
787483	chrX	9935188	9945849	AC002365.1	chrX	9949758	9950242	51	41	18	36.6667
828153	chrX	147579628	147584803	AC002368.4	chrX	147586040	147587569	215	135	78	142.667
828153	chrX	147579628	147584803	AC002368.4	chrX	148356262	148371532	5	3	2	3.33333
688808	chr7	94843257	94846649	AC002429.5	chr7	94075702	94080892	20	26	5	17
688808	chr7	94843257	94846649	AC002429.5	chr7	94832589	94850619	143	266	46	151.667
688041	chr7	92460612	92467461	AC002454.1	chr7	92339241	92351439	65	52	75	64
688041	chr7	92460612	92467461	AC002454.1	chr7	92468125	92471907	140	111	57	102.667
687340	chr7	90224880	90229044	AC002456.2	chr7	90222605	90223075	782	400	182	454.667
687340	chr7	90224880	90229044	AC002456.2	chr7	90643086	90656866	12	16	5	11
687340	chr7	90224880	90229044	AC002456.2	chr7	90890231	90899628	6	5	4	5
695228	chr7	116938738	116942637	AC002465.2	chr7	116932236	116947596	170	176	130	158.667
629404	chr6	67067857	67072058	AC002485.1	chr6	67059430	67062000	118	122	53	97.6667
327641	chr19	35903842	35921173	AC002511.2	chr19	35922293	35923941	526	363	233	374
327644	chr19	35923942	35924938	AC002511.3	chr19	35921174	35930505	836	262	359	485.667
294839	chr17	68117083	68127423	AC002539.1	chr17	67860971	67875991	15	22	7	14.6667
294839	chr17	68117083	68127423	AC002539.1	chr17	68127734	68131273	308	153	83	181.333
282513	chr17	15942879	15950350	AC002553.1	chr17	15941023	15941565	827	664	304	598.333
175411	chr12	111505356	111513903	AC002978.1	chr12	111499160	111501966	682	539	220	480.333
175411	chr12	111505356	111513903	AC002978.1	chr12	111708404	111723834	38	29	16	27.6667
175469	chr12	111723835	111753943	AC002979.1	chr12	111458102	111463632	119	79	34	77.3333
175469	chr12	111723835	111753943	AC002979.1	chr12	111722246	111722424	354	242	418	338
788191	chrX	12164417	12166833	AC002981.1	chrX	12170222	12171032	55	32	11	32.6667
693438	chr7	111446838	111456213	AC003077.1	chr7	111456846	111458915	822	359	117	432.667
693438	chr7	111446838	111456213	AC003077.1	chr7	112136007	112155248	10	16	10	12
288017	chr17	42313834	42330958	AC003102.1	chr17	42349489	42351537	32	29	29	30
287652	chr17	40422306	40426871	AC003104.1	chr17	40415219	40421581	710	509	199	472.667
789043	chrX	14781673	14783307	AC003658.1	chrX	14784638	14786672	195	134	50	126.333
288831	chr17	46017787	46020845	AC003665.1	chr17	46010762	46013246	201	136	99	145.333
787561	chrX	10183841	10190318	AC003666.1	chrX	10176809	10182230	506	245	148	299.667
787561	chrX	10183841	10190318	AC003666.1	chrX	11142323	11147769	7	9	3	6.33333
331781	chr19	58070618	58071857	AC003682.1	chr19	58077186	58081824	576	236	217	343
287465	chr17	39556895	39559653	AC003958.2	chr17	39561754	39566988	347	202	166	238.333
698064	chr7	125677124	125681676	AC003968.1	chr7	124314180	124327453	3	4	3	3.33333
667078	chr7	19149889	19152619	AC003986.6	chr7	18110391	18130206	7	5	4	5.33333
667078	chr7	19149889	19152619	AC003986.6	chr7	18232521	18240059	4	6	6	5.33333
667078	chr7	19149889	19152619	AC003986.6	chr7	18394452	18404214	11	16	5	10.6667
667078	chr7	19149889	19152619	AC003986.6	chr7	19139139	19154063	910	549	112	523.667
667078	chr7	19149889	19152619	AC003986.6	chr7	19705318	19712263	42	32	16	30
693519	chr7	111705301	111713189	AC004001.1	chr7	111688218	111700208	104	97	43	81.3333
668903	chr7	24940241	24944765	AC004016.1	chr7	24946896	24950375	409	277	158	281.333
596408	chr5	131995259	132002938	AC004041.2	chr5	132010405	132013729	66	24	48	46
523546	chr4	92022003	92034865	AC004054.1	chr4	92035384	92039794	232	152	38	140.667
528211	chr4	106470817	106473904	AC004066.3	chr4	106464467	106467673	603	433	147	394.333
528089	chr4	106098019	106101391	AC004069.3	chr4	106106436	106107953	306	214	72	197.333
528089	chr4	106098019	106101391	AC004069.3	chr4	106377359	106390223	27	26	17	23.3333
669601	chr7	27143269	27156411	AC004080.12	chr7	26720262	26732095	15	7	6	9.33333
669601	chr7	27143269	27156411	AC004080.12	chr7	26897455	26906445	90	30	22	47.3333
669601	chr7	27143269	27156411	AC004080.12	chr7	27162021	27167945	307	164	57	176
664555	chr7	11446419	11448376	AC004160.4	chr7	11451669	11454857	437	359	166	320.667
664555	chr7	11446419	11448376	AC004160.4	chr7	11767604	11772417	24	14	6	14.6667
664555	chr7	11446419	11448376	AC004160.4	chr7	12355077	12372127	25	27	16	22.6667
285994	chr17	33327263	33339463	AC004223.1	chr17	32741436	32761339	5	4	2	3.66667
285994	chr17	33327263	33339463	AC004223.1	chr17	32863988	32880690	8	5	4	5.66667
285994	chr17	33327263	33339463	AC004223.1	chr17	33340076	33350597	94	80	41	71.6667
287335	chr17	39072966	39081007	AC004231.2	chr17	39085476	39091013	426	320	136	294
287335	chr17	39072966	39081007	AC004231.2	chr17	39475430	39478883	62	90	23	58.3333
596414	chr5	132021077	132026796	AC004237.1	chr5	132010405	132020752	430	344	75	283
695362	chr7	117326533	117332208	AC004240.2	chr7	117336768	117337956	585	435	125	381.667
263590	chr16	20809499	20832372	AC004381.6	chr16	20834034	20838377	356	327	119	267.333
263590	chr16	20809499	20832372	AC004381.6	chr16	21086457	21098076	53	56	11	40
689210	chr7	96097482	96097899	AC004458.1	chr7	96102328	96105818	500	350	172	340.667
689210	chr7	96097482	96097899	AC004458.1	chr7	96644984	96649925	25	27	16	22.6667
668717	chr7	24292338	24302526	AC004485.3	chr7	24289667	24291641	32	25	17	24.6667
691985	chr7	106932849	106935805	AC004492.1	chr7	106926342	106930349	185	120	43	116
669365	chr7	26414940	26426318	AC004540.4	chr7	25918726	25936200	29	31	12	24
669365	chr7	26414940	26426318	AC004540.4	chr7	26428726	26435210	246	136	58	146.667
669365	chr7	26414940	26426318	AC004540.4	chr7	26531795	26545001	81	74	23	59.3333
669365	chr7	26414940	26426318	AC004540.4	chr7	26690389	26710200	28	26	15	23
669365	chr7	26414940	26426318	AC004540.4	chr7	27203006	27216014	30	36	14	26.6667
670274	chr7	29244468	29248959	AC004593.3	chr7	28962205	28980724	30	40	11	27
670274	chr7	29244468	29248959	AC004593.3	chr7	29255977	29262671	469	165	53	229
670274	chr7	29244468	29248959	AC004593.3	chr7	29609613	29618634	10	11	4	8.33333
791573	chrX	23138197	23142068	AC004673.1	chrX	23130919	23149885	183	148	49	126.667
670744	chr7	30839356	30845759	AC004691.5	chr7	30836356	30839327	405	265	169	279.667
670744	chr7	30839356	30845759	AC004691.5	chr7	31156368	31162912	50	52	27	43
670744	chr7	30839356	30845759	AC004691.5	chr7	31685053	31703649	5	8	3	5.33333
674504	chr7	43285149	43293141	AC004692.4	chr7	42976143	42983632	35	38	22	31.6667
674504	chr7	43285149	43293141	AC004692.4	chr7	43282105	43282592	619	477	254	450
674504	chr7	43285149	43293141	AC004692.4	chr7	43726976	43740525	17	16	6	13
667002	chr7	18936264	18939440	AC004744.3	chr7	18943361	18945019	362	315	130	269
667002	chr7	18936264	18939440	AC004744.3	chr7	19475797	19490278	5	8	3	5.33333
689476	chr7	96919479	96921456	AC004745.1	chr7	96915012	96917744	522	457	140	373
322833	chr19	16122752	16134790	AC004790.1	chr19	16115279	16121309	58	28	42	42.6667
673397	chr7	39649880	39651654	AC004837.4	chr7	39655239	39655868	571	348	168	362.333
673397	chr7	39649880	39651654	AC004837.4	chr7	39776718	39781693	48	46	13	35.6667
673416	chr7	39742394	39746096	AC004837.5	chr7	39748092	39749511	22	13	7	14
696566	chr7	121209377	121214902	AC004875.1	chr7	120977169	120992385	6	7	7	6.66667
696566	chr7	121209377	121214902	AC004875.1	chr7	121220193	121221430	132	67	31	76.6667
689902	chr7	98610216	98611812	AC004893.11	chr7	98614331	98615491	818	366	263	482.333
689902	chr7	98610216	98611812	AC004893.11	chr7	98912191	98918712	68	58	40	55.3333
662253	chr7	2981215	2986553	AC004906.3	chr7	2986624	2987443	500	279	245	341.333
662253	chr7	2981215	2986553	AC004906.3	chr7	3950203	3968845	3	3	4	3.33333
704797	chr7	149095265	149099206	AC004941.3	chr7	149089049	149092902	758	380	196	444.667
687191	chr7	89797750	89805367	AC004969.1	chr7	89806288	89807456	81	69	32	60.6667
687191	chr7	89797750	89805367	AC004969.1	chr7	90059950	90060542	8	19	17	14.6667
673664	chr7	40585156	40594948	AC004988.1	chr7	40358497	40371565	17	11	9	12.3333
684306	chr7	80802658	80808518	AC005008.2	chr7	80638459	80642663	25	17	12	18
684306	chr7	80802658	80808518	AC005008.2	chr7	80791837	80809939	301	227	99	209
686128	chr7	86404114	86410019	AC005009.1	chr7	86400291	86400970	299	266	116	227
686130	chr7	86412415	86416357	AC005009.2	chr7	86418806	86421365	495	221	135	283.667
669962	chr7	28214270	28220875	AC005017.1	chr7	27242350	27246401	5	9	11	8.33333
669962	chr7	28214270	28220875	AC005017.1	chr7	28222137	28227495	1489	1031	443	987.667
669962	chr7	28214270	28220875	AC005017.1	chr7	28541135	28557650	12	11	7	10
674039	chr7	41727444	41736387	AC005027.4	chr7	40366047	40370778	45	49	28	40.6667
674039	chr7	41727444	41736387	AC005027.4	chr7	40644347	40649620	28	18	8	18
674039	chr7	41727444	41736387	AC005027.4	chr7	41722239	41726916	320	245	61	208.667
360641	chr2	102507522	102509732	AC005035.1	chr2	102025116	102035549	29	32	10	23.6667
360641	chr2	102507522	102509732	AC005035.1	chr2	102513197	102515962	1150	948	261	786.333
360641	chr2	102507522	102509732	AC005035.1	chr2	102853361	102859433	78	52	17	49
391582	chr2	201697328	201710181	AC005037.1	chr2	201710315	201710599	269	95	281	215
391613	chr2	201822381	201832549	AC005037.3	chr2	201818539	201819235	569	335	116	340
353933	chr2	74724092	74730955	AC005041.17	chr2	74719652	74720494	176	17	150	114.333
378112	chr2	159589994	159594240	AC005042.4	chr2	158892593	158896732	46	44	7	32.3333
378112	chr2	159589994	159594240	AC005042.4	chr2	159028220	159029051	55	39	10	34.6667
378112	chr2	159589994	159594240	AC005042.4	chr2	159577407	159588987	550	197	149	298.667
692212	chr7	107675249	107677856	AC005048.1	chr7	107103629	107113769	9	10	3	7.33333
692212	chr7	107675249	107677856	AC005048.1	chr7	107678997	107682243	484	367	169	340
690221	chr7	99945535	99957189	AC005071.2	chr7	99722621	99740023	20	24	24	22.6667
690221	chr7	99945535	99957189	AC005071.2	chr7	99958147	99959712	263	129	181	191
668396	chr7	23205292	23213193	AC005082.1	chr7	23198525	23202776	426	332	109	289
670673	chr7	30621402	30628695	AC005154.5	chr7	30619961	30632311	217	80	63	120
684686	chr7	81916023	81922657	AC005159.1	chr7	81909937	81927693	244	155	57	152
693166	chr7	110567690	110568858	AC005161.1	chr7	110560711	110562126	456	272	140	289.333
693166	chr7	110567690	110568858	AC005161.1	chr7	111264402	111283662	20	9	4	11
670204	chr7	29039930	29041158	AC005162.3	chr7	29037628	29044117	215	256	185	218.667
670204	chr7	29039930	29041158	AC005162.3	chr7	29238261	29251943	5	11	7	7.66667
670230	chr7	29118306	29127727	AC005162.4	chr7	29112907	29131438	495	365	109	323
670196	chr7	29021999	29027595	AC005162.5	chr7	29016830	29033111	211	180	112	167.667
529821	chr4	111219390	111231594	AC005187.1	chr4	110336344	110347128	7	3	2	4
529821	chr4	111219390	111231594	AC005187.1	chr4	110941937	110954968	44	20	6	23.3333
529821	chr4	111219390	111231594	AC005187.1	chr4	111214694	111215227	378	345	108	277
529821	chr4	111219390	111231594	AC005187.1	chr4	111428734	111435498	68	47	13	42.6667
599058	chr5	141906466	141919576	AC005215.1	chr5	141540056	141544858	61	39	16	38.6667
599058	chr5	141906466	141919576	AC005215.1	chr5	141891316	141905047	439	369	110	306
416678	chr20	52556648	52560771	AC005220.3	chr20	51289387	51294126	13	5	3	7
416678	chr20	52556648	52560771	AC005220.3	chr20	51773065	51778934	44	27	11	27.3333
416678	chr20	52556648	52560771	AC005220.3	chr20	52022840	52042795	22	15	17	18
416678	chr20	52556648	52560771	AC005220.3	chr20	52182498	52186769	189	131	45	121.667
416678	chr20	52556648	52560771	AC005220.3	chr20	52269565	52269833	67	40	32	46.3333
416678	chr20	52556648	52560771	AC005220.3	chr20	52552339	52564603	697	582	235	504.667
416678	chr20	52556648	52560771	AC005220.3	chr20	52673278	52679088	131	152	27	103.333
281994	chr17	14112611	14117729	AC005224.2	chr17	14457756	14466005	10	6	9	8.33333
281994	chr17	14112611	14117729	AC005224.2	chr17	14830311	14836555	44	19	12	25
226887	chr14	73906576	73921687	AC005280.2	chr14	73636009	73642765	11	12	27	16.6667
226887	chr14	73906576	73921687	AC005280.2	chr14	73925446	73925698	380	189	207	258.667
281003	chr17	10956285	10958706	AC005284.1	chr17	10961021	10968663	431	325	130	295.333
280888	chr17	10436767	10461060	AC005323.1	chr17	10465577	10466777	101	72	49	74
281492	chr17	12607530	12615124	AC005358.3	chr17	12618918	12625941	198	254	54	168.667
599092	chr5	142028309	142037056	AC005370.1	chr5	141530858	141540318	13	48	18	26.3333
599092	chr5	142028309	142037056	AC005370.1	chr5	142259695	142273576	42	36	12	30
706942	chr7	157394807	157419983	AC005481.5	chr7	157389897	157393732	270	188	115	191
673330	chr7	39443814	39453173	AC005483.3	chr7	38836982	38844190	12	12	7	10.3333
673330	chr7	39443814	39453173	AC005483.3	chr7	39441846	39457084	276	159	75	170
322380	chr19	13472343	13487123	AC005513.1	chr19	13461416	13467307	168	161	103	144
706699	chr7	156449637	156452943	AC005534.8	chr7	156445416	156447494	231	114	92	145.667
706699	chr7	156449637	156452943	AC005534.8	chr7	156602586	156612834	15	14	13	14
706703	chr7	156467718	156471115	AC005534.9	chr7	156471235	156475067	556	209	136	300.333
401510	chr2	234863824	234864689	AC005538.5	chr2	234852749	234862763	318	278	127	241
293990	chr17	65017447	65035836	AC005544.1	chr17	65045184	65049456	220	153	120	164.333
281025	chr17	11030374	11041661	AC005548.2	chr17	11042198	11048380	183	155	44	127.333
328764	chr19	42067130	42072031	AC005626.1	chr19	42063473	42065467	1145	710	299	718
281060	chr17	11169777	11171608	AC005725.1	chr17	11163438	11167899	720	677	297	564.667
281060	chr17	11169777	11171608	AC005725.1	chr17	11820004	11839098	11	9	4	8
598917	chr5	141358041	141365080	AC005740.5	chr5	141052150	141071393	8	7	6	7
598917	chr5	141358041	141365080	AC005740.5	chr5	141365551	141367658	76	39	26	47
598917	chr5	141358041	141365080	AC005740.5	chr5	141519259	141523492	33	46	14	31
598689	chr5	140532451	140539223	AC005754.1	chr5	140541107	140546580	168	72	39	93
142508	chr12	2946158	2967420	AC005841.1	chr12	2972101	2983852	289	223	117	209.667
282158	chr17	14678861	14683932	AC005863.1	chr17	13496679	13514496	12	12	4	9.33333
282158	chr17	14678861	14683932	AC005863.1	chr17	13979946	13995455	8	5	7	6.66667
282571	chr17	16219732	16239233	AC005971.3	chr17	16216449	16217227	347	279	147	257.667
704101	chr7	146789597	146804193	AC006004.1	chr7	146774773	146788085	133	79	40	84
666076	chr7	16128615	16132568	AC006035.2	chr7	15354386	15359102	33	45	16	31.3333
666076	chr7	16128615	16132568	AC006035.2	chr7	16120059	16137647	290	253	85	209.333
666076	chr7	16128615	16132568	AC006035.2	chr7	16595430	16602964	94	42	9	48.3333
663468	chr7	8153167	8156322	AC006042.6	chr7	8150823	8161813	685	496	223	468
684583	chr7	81638222	81640005	AC006145.4	chr7	81131151	81140162	64	30	19	37.6667
684583	chr7	81638222	81640005	AC006145.4	chr7	81634836	81643395	526	147	50	241
684583	chr7	81638222	81640005	AC006145.4	chr7	82217383	82233553	16	13	8	12.3333
684583	chr7	81638222	81640005	AC006145.4	chr7	82352371	82363881	18	21	8	15.6667
694986	chr7	116210079	116213191	AC006159.4	chr7	115542189	115560881	13	7	3	7.66667
694986	chr7	116210079	116213191	AC006159.4	chr7	115892265	115904032	116	68	15	66.3333
694986	chr7	116210079	116213191	AC006159.4	chr7	116425513	116434727	44	26	20	30
694980	chr7	116182823	116192788	AC006159.5	chr7	115555395	115560044	9	21	4	11.3333
694980	chr7	116182823	116192788	AC006159.5	chr7	115896975	115905829	83	84	17	61.3333
500997	chr4	17608919	17616354	AC006160.5	chr4	17606084	17607429	643	386	222	417
500997	chr4	17608919	17616354	AC006160.5	chr4	17796165	17810108	32	8	16	18.6667
321691	chr19	9343318	9353405	AC006271.2	chr19	9356576	9357119	223	202	48	157.667
320784	chr19	2906665	2917330	AC006277.2	chr19	2923283	2934464	345	300	128	257.667
313206	chr18	53858306	53862432	AC006305.1	chr18	53078660	53091505	23	8	4	11.6667
313206	chr18	53858306	53862432	AC006305.1	chr18	53849710	53856574	256	227	109	197.333
685217	chr7	83545597	83552907	AC006322.1	chr7	83544634	83559573	444	309	76	276.333
685217	chr7	83545597	83552907	AC006322.1	chr7	83901947	83919124	16	14	8	12.6667
685217	chr7	83545597	83552907	AC006322.1	chr7	84649783	84660491	42	66	15	41
342797	chr2	37826702	37832022	AC006369.2	chr2	37833929	37836339	632	444	116	397.333
833126	chrY	15778782	15781202	AC006371.1	chrY	15775179	15792997	29	16	12	19
706921	chr7	157310478	157323885	AC006372.1	chr7	157329264	157342852	543	93	62	232.667
706918	chr7	157303401	157307949	AC006372.6	chr7	157307969	157310477	179	39	69	95.6667
671038	chr7	31830858	31834729	AC006377.1	chr7	30817761	30831604	4	8	3	5
671038	chr7	31830858	31834729	AC006377.1	chr7	31472050	31482310	29	20	9	19.3333
671038	chr7	31830858	31834729	AC006377.1	chr7	31676002	31688997	51	52	10	37.6667
671038	chr7	31830858	31834729	AC006377.1	chr7	31835004	31839583	1046	704	172	640.667
671038	chr7	31830858	31834729	AC006377.1	chr7	32078166	32088890	97	91	34	74
671038	chr7	31830858	31834729	AC006377.1	chr7	32237555	32245255	41	26	8	25
671038	chr7	31830858	31834729	AC006377.1	chr7	32369441	32374968	21	26	12	19.6667
671038	chr7	31830858	31834729	AC006377.1	chr7	33153302	33168594	6	2	2	3.33333
688428	chr7	93596333	93601243	AC006378.2	chr7	93594890	93595053	288	197	231	238.667
670911	chr7	31353919	31359988	AC006380.1	chr7	31348182	31353216	328	257	87	224
279153	chr17	2314092	2319703	AC006435.1	chr17	1971786	1987100	21	35	10	22
279153	chr17	2314092	2319703	AC006435.1	chr17	2305925	2307732	609	313	257	393
702188	chr7	140273589	140281339	AC006452.1	chr7	140285197	140295274	180	130	80	130
388350	chr2	191569644	191574683	AC006460.2	chr2	191576504	191580579	559	434	178	390.333
663326	chr7	7670628	7680978	AC006465.3	chr7	7682482	7685379	124	203	118	148.333
289219	chr17	47623289	47638762	AC006487.1	chr17	47512960	47523829	32	5	24	20.3333
301841	chr18	14117699	14124966	AC006557.2	chr18	14112378	14114992	136	46	35	72.3333
147973	chr12	21560223	21566894	AC006559.1	chr12	21551599	21559430	181	154	50	128.333
672450	chr7	36501010	36504170	AC006960.7	chr7	36994540	36996278	14	15	7	12
672450	chr7	36501010	36504170	AC006960.7	chr7	37225132	37236225	37	20	6	21
686711	chr7	88269219	88272948	AC006988.1	chr7	87864522	87868070	11	14	4	9.66667
686711	chr7	88269219	88272948	AC006988.1	chr7	88264809	88268110	403	270	61	244.667
667428	chr7	20171189	20182032	AC007001.4	chr7	20183873	20187163	593	478	110	393.667
667428	chr7	20171189	20182032	AC007001.4	chr7	20347489	20353091	30	24	12	22
667428	chr7	20171189	20182032	AC007001.4	chr7	20635144	20639529	15	19	5	13
394370	chr2	210893932	210895712	AC007038.7	chr2	210383619	210400149	9	9	7	8.33333
394370	chr2	210893932	210895712	AC007038.7	chr2	210886099	210886566	456	344	136	312
394370	chr2	210893932	210895712	AC007038.7	chr2	211026242	211030129	66	51	13	43.3333
394370	chr2	210893932	210895712	AC007038.7	chr2	211327316	211340197	8	11	4	7.66667
352987	chr2	71171022	71181375	AC007040.7	chr2	70539928	70547338	11	15	14	13.3333
352987	chr2	71171022	71181375	AC007040.7	chr2	71007713	71015354	98	85	37	73.3333
430243	chr22	20874573	20891767	AC007050.17	chr22	20866800	20872761	565	496	280	447
228118	chr14	78856357	78870336	AC007056.1	chr14	78873507	78873672	63	59	99	73.6667
228118	chr14	78856357	78870336	AC007056.1	chr14	79027475	79044733	5	5	5	5
670231	chr7	29127728	29130040	AC007096.1	chr7	29131439	29134984	442	318	108	289.333
350586	chr2	63083481	63093347	AC007098.1	chr2	63094055	63094401	30	13	16	19.6667
354213	chr2	75699717	75702099	AC007099.2	chr2	75693658	75696000	356	288	135	259.667
349523	chr2	59467626	59474178	AC007131.1	chr2	58998567	59012943	20	16	4	13.3333
349523	chr2	59467626	59474178	AC007131.1	chr2	59462352	59465893	478	358	120	318.667
349549	chr2	59548855	59555328	AC007131.2	chr2	59546614	59548758	251	138	48	145.667
349549	chr2	59548855	59555328	AC007131.2	chr2	60298279	60309314	16	25	16	19
349617	chr2	59757998	59764017	AC007179.1	chr2	60298279	60298879	46	8	14	22.6667
227428	chr14	76041807	76048096	AC007182.1	chr14	76035473	76041772	194	192	63	149.667
391864	chr2	202703438	202707658	AC007242.1	chr2	202701550	202717571	1322	612	295	743
391864	chr2	202703438	202707658	AC007242.1	chr2	203035206	203044606	114	63	35	70.6667
360745	chr2	102796770	102798587	AC007271.3	chr2	101974996	101982232	8	7	8	7.66667
360745	chr2	102796770	102798587	AC007271.3	chr2	102501909	102513196	31	28	10	23
360745	chr2	102796770	102798587	AC007271.3	chr2	102631079	102642523	118	90	49	85.6667
360745	chr2	102796770	102798587	AC007271.3	chr2	102789465	102790458	872	641	215	576
360745	chr2	102796770	102798587	AC007271.3	chr2	103055985	103057605	35	47	20	34
670505	chr7	30020860	30031878	AC007285.6	chr7	30017237	30020819	490	371	129	330
670505	chr7	30020860	30031878	AC007285.6	chr7	30435646	30444725	23	14	12	16.3333
670528	chr7	30114142	30117439	AC007285.7	chr7	29795660	29800997	23	23	10	18.6667
670528	chr7	30114142	30117439	AC007285.7	chr7	30118283	30121159	384	232	150	255.333
430286	chr22	21074475	21084073	AC007308.1	chr22	21104135	21118577	74	32	48	51.3333
672378	chr7	36267377	36276565	AC007327.5	chr7	36263238	36263783	28	11	23	20.6667
268707	chr16	52281792	52289815	AC007333.1	chr16	52291954	52298360	641	329	63	344.333
268010	chr16	49689083	49714490	AC007339.1	chr16	49686792	49687357	153	155	105	137.667
672551	chr7	36873585	36884968	AC007349.7	chr7	36517775	36525677	8	12	8	9.33333
672551	chr7	36873585	36884968	AC007349.7	chr7	36889970	36891582	231	174	61	155.333
391895	chr2	202817838	202818898	AC007358.1	chr2	202811155	202813601	569	450	188	402.333
393006	chr2	206624678	206641859	AC007362.3	chr2	205727104	205746205	6	7	4	5.66667
393006	chr2	206624678	206641859	AC007362.3	chr2	206618306	206622607	461	385	156	334
351209	chr2	65002925	65007574	AC007365.1	chr2	64335166	64353879	10	6	2	6
351209	chr2	65002925	65007574	AC007365.1	chr2	64878312	64884410	48	49	19	38.6667
351209	chr2	65002925	65007574	AC007365.1	chr2	65010613	65019370	565	413	244	407.333
393097	chr2	206976307	206983973	AC007383.4	chr2	206984839	206985840	574	401	193	389.333
351277	chr2	65272002	65280740	AC007386.4	chr2	65655338	65662825	11	13	8	10.6667
342660	chr2	37421923	37427666	AC007390.5	chr2	37433408	37439286	189	128	56	124.333
342749	chr2	37672593	37690496	AC007391.1	chr2	37665578	37670628	56	44	30	43.3333
352920	chr2	70907748	70915617	AC007395.3	chr2	70539928	70557681	10	10	8	9.33333
352920	chr2	70907748	70915617	AC007395.3	chr2	70915626	70921925	165	133	42	113.333
352920	chr2	70907748	70915617	AC007395.3	chr2	71147222	71156147	14	11	11	12
342452	chr2	36770420	36781752	AC007401.2	chr2	36763311	36763815	199	193	78	156.667
346965	chr2	51657421	51664215	AC007402.1	chr2	51651924	51655991	337	283	80	233.333
381994	chr2	171568282	171575554	AC007405.2	chr2	171257839	171263295	43	26	24	31
382013	chr2	171638259	171641967	AC007405.7	chr2	171246372	171256810	85	84	33	67.3333
382013	chr2	171638259	171641967	AC007405.7	chr2	171635584	171647390	1181	891	234	768.667
291621	chr17	55808976	55828271	AC007431.1	chr17	55210433	55222836	26	13	14	17.6667
144113	chr12	9279208	9287943	AC007436.1	chr12	9273212	9273654	289	209	113	203.667
144937	chr12	11694590	11696292	AC007450.1	chr12	11692659	11698794	373	223	91	229
144937	chr12	11694590	11696292	AC007450.1	chr12	12187156	12203866	26	31	7	21.3333
820002	chrX	120460099	120468608	AC007486.1	chrX	120456560	120456765	90	89	56	78.3333
146384	chr12	16560246	16569197	AC007528.1	chr12	16309257	16320473	18	14	7	13
146384	chr12	16560246	16569197	AC007528.1	chr12	16581349	16583781	124	93	30	82.3333
146384	chr12	16560246	16569197	AC007528.1	chr12	17779721	17795880	4	6	2	4
145537	chr12	13739260	13744348	AC007535.1	chr12	13735740	13737953	840	700	277	605.667
672280	chr7	35878511	35889686	AC007551.1	chr7	35742041	35750068	38	49	27	38
672280	chr7	35878511	35889686	AC007551.1	chr7	35866857	35877125	195	127	97	139.667
381490	chr2	169956259	169964906	AC007556.3	chr2	169309930	169326909	4	7	3	4.66667
381490	chr2	169956259	169964906	AC007556.3	chr2	169815523	169821405	206	186	86	159.333
381490	chr2	169956259	169964906	AC007556.3	chr2	169952750	169954374	562	476	175	404.333
381490	chr2	169956259	169964906	AC007556.3	chr2	170246317	170251951	40	22	10	24
396624	chr2	217734628	217739661	AC007557.1	chr2	218575164	218587644	10	11	7	9.33333
396621	chr2	217713111	217719878	AC007557.4	chr2	218358948	218371361	16	22	4	14
261359	chr16	12180269	12184172	AC007601.1	chr16	12185147	12202393	231	137	111	159.667
268224	chr16	50645927	50648567	AC007608.1	chr16	50650427	50660820	578	881	461	640
268224	chr16	50645927	50648567	AC007608.1	chr16	50959390	50979077	10	8	11	9.66667
267733	chr16	48684084	48687486	AC007611.1	chr16	48678445	48681442	31	21	13	21.6667
490951	chr3	179112683	179117920	AC007620.3	chr3	179111203	179120922	450	360	219	343
490951	chr3	179112683	179117920	AC007620.3	chr3	179298448	179305811	40	35	24	33
145190	chr12	12507457	12515147	AC007621.1	chr12	11715511	11727310	13	11	15	13
145190	chr12	12507457	12515147	AC007621.1	chr12	12515342	12519127	327	317	144	262.667
145190	chr12	12507457	12515147	AC007621.1	chr12	12853050	12864725	46	59	25	43.3333
393060	chr2	206849773	206862955	AC007679.3	chr2	206867008	206867378	467	371	168	335.333
346801	chr2	51166414	51173621	AC007682.1	chr2	51176892	51181845	400	324	75	266.333
346801	chr2	51166414	51173621	AC007682.1	chr2	51755124	51769545	8	9	7	8
346808	chr2	51185620	51189733	AC007682.2	chr2	51182667	51185408	241	147	51	146.333
379438	chr2	163623892	163626890	AC007740.1	chr2	163621172	163623056	222	177	47	148.667
379236	chr2	163013915	163023237	AC007750.5	chr2	162100080	162108030	6	9	4	6.33333
379236	chr2	163013915	163023237	AC007750.5	chr2	162435315	162453162	31	15	8	18
379236	chr2	163013915	163023237	AC007750.5	chr2	163025085	163031520	834	504	188	508.667
294312	chr17	66382529	66387178	AC007780.1	chr17	66376040	66391929	57	57	73	62.3333
175153	chr12	110205640	110213215	AC007834.3	chr12	110214440	110219563	276	184	160	206.667
227188	chr14	75179298	75195674	AC007956.1	chr14	74952676	74963875	23	20	11	18
227188	chr14	75179298	75195674	AC007956.1	chr14	75173441	75177266	570	338	140	349.333
700011	chr7	132714971	132721968	AC008038.1	chr7	132724011	132729413	882	461	212	518.333
228191	chr14	79082516	79084562	AC008045.1	chr14	78512798	78524850	27	14	4	15
228191	chr14	79082516	79084562	AC008045.1	chr14	79085815	79089175	586	321	196	367.667
706367	chr7	155301716	155306664	AC008060.5	chr7	154713714	154729408	14	10	4	9.33333
706367	chr7	155301716	155306664	AC008060.5	chr7	155295511	155298597	435	366	107	302.667
706333	chr7	155173835	155182619	AC008060.7	chr7	155524919	155533402	24	14	12	16.6667
706350	chr7	155247684	155262051	AC008060.8	chr7	155269617	155270451	379	346	144	289.667
379207	chr2	162928826	162933700	AC008063.2	chr2	162103051	162108415	4	5	4	4.33333
379207	chr2	162928826	162933700	AC008063.2	chr2	162926209	162927143	589	475	189	417.667
355847	chr2	80843106	80846853	AC008067.2	chr2	80840595	80841720	366	257	124	249
336791	chr2	17022736	17028169	AC008069.1	chr2	17016528	17034350	716	601	155	490.667
336791	chr2	17022736	17028169	AC008069.1	chr2	17484694	17488723	37	25	7	23
336794	chr2	17034351	17039791	AC008069.2	chr2	17028170	17030635	447	395	96	312.667
336794	chr2	17034351	17039791	AC008069.2	chr2	17484694	17493199	11	8	2	7
338984	chr2	24295863	24302128	AC008073.5	chr2	24046200	24047787	100	101	37	79.3333
338984	chr2	24295863	24302128	AC008073.5	chr2	24281783	24290674	552	359	336	415.667
339005	chr2	24396269	24400364	AC008073.7	chr2	24390476	24395815	224	156	66	148.667
339014	chr2	24423614	24425787	AC008073.9	chr2	24046200	24053322	19	8	7	11.3333
339014	chr2	24423614	24425787	AC008073.9	chr2	24429056	24434860	245	191	163	199.667
351094	chr2	64676041	64685208	AC008074.3	chr2	64272779	64273331	36	25	15	25.3333
351094	chr2	64676041	64685208	AC008074.3	chr2	64685552	64686076	508	355	131	331.333
699676	chr7	131536573	131538666	AC008085.1	chr7	131538868	131544640	494	626	204	441.333
699676	chr7	131536573	131538666	AC008085.1	chr7	131726907	131730171	43	61	24	42.6667
699676	chr7	131536573	131538666	AC008085.1	chr7	132263588	132277297	27	27	7	20.3333
700407	chr7	134070085	134076097	AC008154.1	chr7	134067735	134068521	110	80	44	78
700378	chr7	133968001	133984111	AC008154.4	chr7	133682996	133700977	16	15	20	17
292733	chr17	60230858	60239188	AC008158.1	chr17	60228176	60230388	174	122	67	121
386782	chr2	186664132	186666379	AC008174.3	chr2	186658945	186672598	858	481	143	494
336458	chr2	15828658	15834232	AC008271.1	chr2	15822467	15824624	206	137	68	137
378308	chr2	160242682	160244321	AC008277.1	chr2	159759325	159769486	17	20	13	16.6667
378308	chr2	160242682	160244321	AC008277.1	chr2	160237369	160255656	799	228	184	403.667
336419	chr2	15701485	15705850	AC008278.2	chr2	15709591	15712784	388	267	99	251.333
336454	chr2	15818632	15822432	AC008278.3	chr2	15822467	15828657	39	19	34	30.6667
581851	chr5	86534776	86538784	AC008394.1	chr5	86530692	86533544	1125	724	152	667
581851	chr5	86534776	86538784	AC008394.1	chr5	87559025	87577861	2	3	4	3
602869	chr5	154402015	154408382	AC008410.1	chr5	154381979	154387290	79	72	26	59
331084	chr19	54373773	54391658	AC008440.5	chr19	54394837	54398205	332	295	157	261.333
327527	chr19	35321278	35324100	AC008555.3	chr19	35314280	35315393	474	312	121	302.333
578666	chr5	76431806	76434805	AC008581.1	chr5	76423684	76431016	373	306	136	271.667
578666	chr5	76431806	76434805	AC008581.1	chr5	76729675	76741388	77	22	21	40
584649	chr5	95187970	95189230	AC008592.4	chr5	94990784	94997997	55	55	19	43
584649	chr5	95187970	95189230	AC008592.4	chr5	95928967	95941012	34	19	12	21.6667
584651	chr5	95191249	95198706	AC008592.5	chr5	95200214	95204496	330	147	111	196
584651	chr5	95191249	95198706	AC008592.5	chr5	95470739	95479426	13	19	6	12.6667
584651	chr5	95191249	95198706	AC008592.5	chr5	95671361	95678707	61	70	43	58
584651	chr5	95191249	95198706	AC008592.5	chr5	95939121	95945961	32	43	5	26.6667
728702	chr8	74183162	74188264	AC008598.1	chr8	74175965	74191726	763	199	64	342
602715	chr5	153717005	153720295	AC008625.1	chr5	152869344	152881026	3	2	2	2.33333
602715	chr5	153717005	153720295	AC008625.1	chr5	153710253	153716621	487	316	94	299
608237	chr5	171703461	171707150	AC008671.1	chr5	171698025	171715668	35	17	21	24.3333
603608	chr5	156800655	156804320	AC008676.1	chr5	156807857	156809004	508	386	180	358
603697	chr5	157112085	157118741	AC008694.3	chr5	157101274	157108596	10	16	20	15.3333
331168	chr19	54935995	54949473	AC008746.3	chr19	54950627	54955080	211	147	80	146
598817	chr5	140997436	141001348	AC008781.7	chr5	140785709	140804377	33	22	13	22.6667
567729	chr5	40793690	40802064	AC008810.1	chr5	40782056	40788633	253	202	49	168
573787	chr5	60850090	60854961	AC008836.1	chr5	59984048	60000043	7	10	4	7
573787	chr5	60850090	60854961	AC008836.1	chr5	60859915	60861966	609	501	155	421.667
566699	chr5	37801580	37802300	AC008869.1	chr5	37806955	37808569	583	417	199	399.667
566699	chr5	37801580	37802300	AC008869.1	chr5	38189915	38192154	30	30	20	26.6667
572230	chr5	56154298	56165554	AC008937.2	chr5	55243145	55254252	25	20	6	17
572230	chr5	56154298	56165554	AC008937.2	chr5	55563961	55567802	71	62	21	51.3333
564950	chr5	32378290	32379816	AC008949.1	chr5	32249669	32255466	37	29	19	28.3333
564950	chr5	32378290	32379816	AC008949.1	chr5	32383552	32384456	321	182	114	205.667
597206	chr5	135048409	135058021	AC009009.1	chr5	135046660	135058803	252	136	236	208
258956	chr16	1029620	1036012	AC009041.2	chr16	1038655	1045973	620	76	272	322.667
261222	chr16	11428923	11444698	AC009121.1	chr16	11447315	11452430	788	596	222	535.333
277591	chr16	84225815	84257830	AC009123.1	chr16	84261133	84272940	41	12	29	27.3333
277403	chr16	83434090	83438391	AC009142.1	chr16	83438856	83448911	173	270	101	181.333
276333	chr16	79702029	79710780	AC009159.1	chr16	79692236	79701185	407	440	108	318.333
393473	chr2	208174591	208175887	AC009226.1	chr2	207663982	207670742	47	83	7	45.6667
393473	chr2	208174591	208175887	AC009226.1	chr2	208021970	208033435	79	86	97	87.3333
393473	chr2	208174591	208175887	AC009226.1	chr2	208164029	208173463	1558	519	178	751.667
376766	chr2	155308983	155314644	AC009227.2	chr2	155299025	155306576	831	404	146	460.333
376766	chr2	155308983	155314644	AC009227.2	chr2	156164020	156179385	96	81	11	62.6667
346725	chr2	50922472	50929597	AC009234.1	chr2	50914400	50933196	332	238	94	221.333
346725	chr2	50922472	50929597	AC009234.1	chr2	52294334	52312664	10	2	2	4.66667
378964	chr2	162199599	162208201	AC009299.1	chr2	162209993	162216639	449	202	83	244.667
378936	chr2	162108416	162118044	AC009299.2	chr2	162094370	162100079	182	122	55	119.667
365459	chr2	118749134	118755558	AC009303.1	chr2	118578889	118583497	63	58	23	48
365459	chr2	118749134	118755558	AC009303.1	chr2	118760970	118761949	674	476	218	456
365390	chr2	118555596	118563122	AC009312.1	chr2	118544882	118548592	187	155	36	126
378896	chr2	162013468	162020247	AC009313.1	chr2	162010570	162021227	296	172	103	190.333
699924	chr7	132443212	132448012	AC009365.4	chr7	132434530	132454485	256	403	125	261.333
663414	chr7	7986211	7991370	AC009473.1	chr7	7981773	7983420	483	395	147	341.667
381369	chr2	169641295	169644449	AC009475.2	chr2	170023122	170039384	17	6	4	9
374592	chr2	148659912	148660536	AC009480.3	chr2	147827318	147844043	59	63	13	45
374592	chr2	148659912	148660536	AC009480.3	chr2	148653387	148658992	997	630	159	595.333
374592	chr2	148659912	148660536	AC009480.3	chr2	149838417	149856249	10	6	3	6.33333
378991	chr2	162278434	162285226	AC009487.4	chr2	162275757	162277412	517	302	199	339.333
378991	chr2	162278434	162285226	AC009487.4	chr2	162804809	162819691	21	19	6	15.3333
350652	chr2	63274196	63276073	AC009501.4	chr2	63014802	63026228	50	35	26	37
350652	chr2	63274196	63276073	AC009501.4	chr2	63266472	63270099	802	312	185	433
361840	chr2	106471337	106474382	AC009505.2	chr2	106195203	106205040	23	33	19	25
361840	chr2	106471337	106474382	AC009505.2	chr2	106464296	106480045	869	404	381	551.333
378381	chr2	160470703	160474295	AC009506.1	chr2	159754855	159768619	4	10	9	7.66667
378381	chr2	160470703	160474295	AC009506.1	chr2	160464425	160466535	402	218	166	262
699951	chr7	132514929	132517014	AC009518.8	chr7	132510702	132522960	785	592	241	539.333
699951	chr7	132514929	132517014	AC009518.8	chr7	133103637	133112836	23	9	9	13.6667
700651	chr7	134878946	134885205	AC009542.2	chr7	134686525	134694556	41	32	24	32.3333
700651	chr7	134878946	134885205	AC009542.2	chr7	134885224	134892443	918	740	253	637
249922	chr15	70017141	70023265	AC009677.1	chr15	69874571	69882440	46	67	23	45.3333
249922	chr15	70017141	70023265	AC009677.1	chr15	70014794	70016593	441	305	139	295
249922	chr15	70017141	70023265	AC009677.1	chr15	70379375	70384702	31	54	46	43.6667
249922	chr15	70017141	70023265	AC009677.1	chr15	70539256	70553593	16	22	12	16.6667
249922	chr15	70017141	70023265	AC009677.1	chr15	70785714	70797621	17	7	18	14
700958	chr7	135926229	135930509	AC009784.1	chr7	135921974	135936883	508	246	166	306.667
305802	chr18	30104299	30111824	AC009835.1	chr18	29737655	29751190	13	13	12	12.6667
305802	chr18	30104299	30111824	AC009835.1	chr18	29855579	29859290	13	10	13	12
305802	chr18	30104299	30111824	AC009835.1	chr18	30114963	30117192	281	164	93	179.333
400597	chr2	231033334	231037959	AC009950.2	chr2	230872818	230885012	77	44	35	52
400597	chr2	231033334	231037959	AC009950.2	chr2	231032134	231032571	574	342	254	390
349948	chr2	60722184	60725012	AC009970.1	chr2	59518526	59532463	12	19	8	13
349948	chr2	60722184	60725012	AC009970.1	chr2	60540048	60554535	45	40	17	34
349948	chr2	60722184	60725012	AC009970.1	chr2	60711097	60720944	727	335	241	434.333
400537	chr2	230856524	230861388	AC009973.1	chr2	230872818	230877233	81	81	26	62.6667
400537	chr2	230856524	230861388	AC009973.1	chr2	231014721	231023685	27	37	9	24.3333
99898	chr10	125494351	125510302	AC009987.1	chr10	125518984	125519797	71	77	46	64.6667
242481	chr15	44822817	44829911	AC009996.1	chr15	44575219	44580221	24	19	6	16.3333
242481	chr15	44822817	44829911	AC009996.1	chr15	44815653	44821505	400	313	124	279
245938	chr15	56050721	56059493	AC009997.1	chr15	56047219	56065377	422	314	109	281.667
666841	chr7	18469758	18490399	AC010082.2	chr7	18491450	18493239	392	367	115	291.333
380517	chr2	166935132	166948926	AC010127.3	chr2	166925050	166926784	160	81	38	93
380517	chr2	166935132	166948926	AC010127.3	chr2	167261248	167266400	17	19	5	13.6667
380476	chr2	166787508	166792582	AC010127.5	chr2	166252763	166258911	19	12	5	12
396965	chr2	218837220	218846235	AC010136.2	chr2	218283775	218289777	3	6	6	5
396965	chr2	218837220	218846235	AC010136.2	chr2	218641556	218653939	38	20	20	26
396965	chr2	218837220	218846235	AC010136.2	chr2	218846312	218854150	181	187	171	179.667
370785	chr2	137300815	137304108	AC010146.1	chr2	137295654	137307261	1014	465	121	533.333
370785	chr2	137300815	137304108	AC010146.1	chr2	138567660	138581036	13	11	3	9
339383	chr2	25939081	25945218	AC010150.1	chr2	25949746	25957412	145	96	42	94.3333
476661	chr3	134126245	134129192	AC010207.1	chr3	134120997	134133405	654	463	211	442.667
172511	chr12	101048492	101052686	AC010209.1	chr12	100757525	100772336	11	25	18	18
590975	chr5	114937005	114941483	AC010226.4	chr5	114637936	114638714	163	130	59	117.333
590975	chr5	114937005	114941483	AC010226.4	chr5	114943067	114945631	860	634	152	548.667
590975	chr5	114937005	114941483	AC010226.4	chr5	115184962	115201489	50	31	20	33.6667
590975	chr5	114937005	114941483	AC010226.4	chr5	115394080	115412163	31	28	20	26.3333
591074	chr5	115288934	115299576	AC010282.1	chr5	114993583	114994328	24	30	8	20.6667
591074	chr5	115288934	115299576	AC010282.1	chr5	115300388	115306519	526	339	248	371
602636	chr5	153469738	153475565	AC010295.1	chr5	153466748	153480938	206	376	147	243
602636	chr5	153469738	153475565	AC010295.1	chr5	153775029	153790880	32	26	12	23.3333
330453	chr19	51319574	51336187	AC010325.1	chr19	51342619	51344567	138	32	91	87
331844	chr19	58356761	58384597	AC010326.1	chr19	58348519	58351662	132	97	38	89
565785	chr5	35034176	35037074	AC010368.1	chr5	34540554	34554574	4	10	3	5.66667
565785	chr5	35034176	35037074	AC010368.1	chr5	35042094	35042323	391	280	259	310
565785	chr5	35034176	35037074	AC010368.1	chr5	35939094	35959067	6	3	4	4.33333
575869	chr5	67262227	67272248	AC010376.1	chr5	67273783	67274902	356	277	127	253.333
563594	chr5	27984805	27988774	AC010455.1	chr5	27976833	27994860	22	9	8	13
330024	chr19	48552650	48555114	AC010458.1	chr19	48556362	48567084	95	95	67	85.6667
589528	chr5	110603795	110607566	AC010468.2	chr5	110591427	110599718	256	224	75	185
589528	chr5	110603795	110607566	AC010468.2	chr5	111720368	111739466	5	5	5	5
278289	chr16	87734983	87747486	AC010536.1	chr16	87748635	87757997	229	125	168	174
278289	chr16	87734983	87747486	AC010536.1	chr16	88088615	88091809	6	5	7	6
271829	chr16	62858452	62863213	AC010546.1	chr16	62852019	62866987	477	762	266	501.667
603568	chr5	156654508	156666310	AC010609.1	chr5	156645693	156648583	283	241	99	207.667
603568	chr5	156654508	156666310	AC010609.1	chr5	156888158	156905219	17	23	8	16
384455	chr2	179499966	179504080	AC010680.1	chr2	179234517	179253644	9	8	2	6.33333
384455	chr2	179499966	179504080	AC010680.1	chr2	179495241	179496370	273	269	116	219.333
393255	chr2	207473769	207475203	AC010731.2	chr2	207475702	207478469	331	245	88	221.333
393275	chr2	207503231	207509772	AC010731.3	chr2	207511193	207514643	933	813	243	663
344061	chr2	41820977	41823735	AC010739.1	chr2	41674864	41689097	9	11	6	8.66667
344061	chr2	41820977	41823735	AC010739.1	chr2	41826363	41826613	147	87	120	118
303026	chr18	21472406	21475822	AC010754.1	chr18	21464735	21467519	605	423	79	369
303026	chr18	21472406	21475822	AC010754.1	chr18	21695534	21695946	34	31	17	27.3333
736007	chr8	97655976	97662338	AC010859.1	chr8	97342265	97349987	31	30	11	24
736007	chr8	97655976	97662338	AC010859.1	chr8	97652655	97655624	494	343	155	330.667
736007	chr8	97655976	97662338	AC010859.1	chr8	97779358	97788315	83	63	31	59
736007	chr8	97655976	97662338	AC010859.1	chr8	97859098	97868560	80	47	14	47
736007	chr8	97655976	97662338	AC010859.1	chr8	98177371	98182820	19	14	12	15
736007	chr8	97655976	97662338	AC010859.1	chr8	98571496	98572477	12	9	7	9.33333
338123	chr2	21344865	21349759	AC010872.2	chr2	21340471	21343332	495	248	88	277
344502	chr2	43455071	43460452	AC010883.5	chr2	43708977	43711709	160	108	55	107.667
332904	chr2	3651725	3655755	AC010907.2	chr2	3662192	3666952	179	81	61	107
103230	chr11	4463939	4472503	AC010930.1	chr11	4206213	4219862	38	32	16	28.6667
103230	chr11	4463939	4472503	AC010930.1	chr11	4458869	4476395	882	698	192	590.667
334815	chr2	10141130	10167070	AC010969.1	chr2	10120126	10130933	56	35	38	43
705190	chr7	150720024	150728615	AC010973.1	chr7	150731900	150739103	506	205	232	314.333
369589	chr2	133415643	133418532	AC010974.3	chr2	133919296	133928378	18	14	13	15
355485	chr2	79726832	79729925	AC010975.1	chr2	79723355	79735631	203	222	58	161
368206	chr2	128224215	128225863	AC010976.2	chr2	128094100	128095250	49	53	35	45.6667
368206	chr2	128224215	128225863	AC010976.2	chr2	128214912	128229809	511	294	242	349
398171	chr2	223182946	223186906	AC010980.2	chr2	223191010	223194108	347	247	91	228.333
398171	chr2	223182946	223186906	AC010980.2	chr2	223414342	223420089	120	49	42	70.3333
85650	chr10	77152036	77167684	AC010997.1	chr10	77171382	77176267	151	91	95	112.333
85650	chr10	77152036	77167684	AC010997.1	chr10	77300066	77305520	27	34	18	26.3333
85650	chr10	77152036	77167684	AC010997.1	chr10	77402725	77412305	79	61	23	54.3333
85650	chr10	77152036	77167684	AC010997.1	chr10	77792181	77799138	47	37	16	33.3333
246296	chr15	57255608	57268106	AC010999.1	chr15	57241817	57244492	68	36	27	43.6667
246296	chr15	57255608	57268106	AC010999.1	chr15	57417333	57426217	39	33	15	29
726618	chr8	67831881	67835836	AC011031.1	chr8	67361360	67368603	16	15	4	11.6667
726618	chr8	67831881	67835836	AC011031.1	chr8	67816124	67829396	290	255	82	209
726618	chr8	67831881	67835836	AC011031.1	chr8	68095299	68098837	35	25	10	23.3333
338840	chr2	23746714	23748787	AC011239.1	chr2	23725828	23744994	142	173	126	147
662432	chr7	3682500	3683828	AC011284.3	chr7	3679562	3681758	189	154	73	138.667
662432	chr7	3682500	3683828	AC011284.3	chr7	4064908	4067341	6	10	4	6.66667
673385	chr7	39600890	39606716	AC011290.4	chr7	39776718	39784213	108	76	45	76.3333
675345	chr7	46798106	46804187	AC011294.3	chr7	46795361	46798000	348	324	128	266.667
495714	chr3	194864153	194868702	AC011325.1	chr3	194384041	194400759	25	23	7	18.3333
495714	chr3	194864153	194868702	AC011325.1	chr3	194869112	194871165	666	514	169	449.667
608684	chr5	173471072	173474167	AC011333.1	chr5	173018971	173034501	15	34	9	19.3333
608684	chr5	173471072	173474167	AC011333.1	chr5	173738264	173748273	70	45	29	48
608684	chr5	173471072	173474167	AC011333.1	chr5	174218097	174235336	18	12	5	11.6667
600490	chr5	146453876	146465843	AC011357.1	chr5	145914957	145917862	12	13	7	10.6667
600490	chr5	146453876	146465843	AC011357.1	chr5	146448989	146450163	326	304	75	235
600490	chr5	146453876	146465843	AC011357.1	chr5	146737756	146746193	9	12	10	10.3333
604616	chr5	160082781	160092590	AC011363.1	chr5	160078111	160094550	389	288	160	279
604616	chr5	160082781	160092590	AC011363.1	chr5	160211074	160214657	46	45	29	40
604616	chr5	160082781	160092590	AC011363.1	chr5	160960510	160975223	20	8	8	12
589082	chr5	109216588	109220762	AC011366.3	chr5	109210385	109230346	209	139	113	153.667
608277	chr5	171863813	171879294	AC011407.1	chr5	171859274	171861296	403	403	265	357
608277	chr5	171863813	171879294	AC011407.1	chr5	172102601	172122591	13	10	10	11
328201	chr19	38543471	38546215	AC011465.1	chr19	38546475	38550977	1048	493	344	628.333
324324	chr19	22784025	22790756	AC011467.2	chr19	22795533	22799956	141	50	58	83
321954	chr19	10777033	10778793	AC011475.2	chr19	10786221	10794126	366	337	207	303.333
326487	chr19	31101478	31115185	AC011478.1	chr19	31647439	31654051	7	7	8	7.33333
326487	chr19	31101478	31115185	AC011478.1	chr19	32100650	32107864	10	7	7	8
329783	chr19	46992305	47002560	AC011484.1	chr19	47008270	47011712	126	112	63	100.333
328932	chr19	42920697	42933052	AC011497.1	chr19	42598003	42617295	9	13	11	11
328932	chr19	42920697	42933052	AC011497.1	chr19	42937624	42938384	319	222	121	220.667
699810	chr7	132031756	132038662	AC011625.1	chr7	131643755	131650333	4	4	5	4.33333
699810	chr7	132031756	132038662	AC011625.1	chr7	132041095	132049158	107	124	177	136
699810	chr7	132031756	132038662	AC011625.1	chr7	132245037	132251297	17	21	8	15.3333
674589	chr7	43562050	43573443	AC011738.4	chr7	43729445	43740525	17	8	9	11.3333
355813	chr2	80752200	80755142	AC011741.1	chr2	80756897	80758001	678	530	269	492.333
334448	chr2	8821099	8824736	AC011747.7	chr2	7559120	7575376	26	15	9	16.6667
334448	chr2	8821099	8824736	AC011747.7	chr2	8688778	8697116	63	37	23	41
334448	chr2	8821099	8824736	AC011747.7	chr2	8811210	8828142	141	101	91	111
341791	chr2	34628660	34632131	AC011748.1	chr2	34632274	34634080	108	78	46	77.3333
370560	chr2	136566352	136579822	AC011893.3	chr2	136581899	136588696	327	275	127	243
370560	chr2	136566352	136579822	AC011893.3	chr2	137141368	137156974	18	9	7	11.3333
707014	chr7	157818448	157820817	AC011899.10	chr7	157825594	157826297	564	427	209	400
706982	chr7	157644922	157662476	AC011899.9	chr7	157226782	157238580	24	12	27	21
252340	chr15	79268847	79273009	AC011944.1	chr15	79470948	79476535	74	74	18	55.3333
243408	chr15	47843264	47845877	AC012050.1	chr15	47841486	47851229	332	184	62	192.667
244379	chr15	51056770	51060365	AC012100.1	chr15	51062782	51065599	747	509	182	479.333
244379	chr15	51056770	51060365	AC012100.1	chr15	51165832	51173443	334	161	75	190
714103	chr8	23625837	23626477	AC012119.1	chr8	23622763	23625598	298	250	100	216
714103	chr8	23625837	23626477	AC012119.1	chr8	24055285	24059804	15	19	8	14
714103	chr8	23625837	23626477	AC012119.1	chr8	24284263	24292616	14	8	12	11.3333
305881	chr18	30343576	30351087	AC012123.1	chr18	30333760	30343061	140	97	62	99.6667
279668	chr17	5014569	5017238	AC012146.7	chr17	5009185	5028312	401	265	175	280.333
259818	chr16	5808644	5813214	AC012175.1	chr16	5817709	5818141	196	176	115	162.333
717705	chr8	35646020	35651234	AC012215.1	chr8	34999193	35018418	16	10	7	11
717705	chr8	35646020	35651234	AC012215.1	chr8	35641246	35645768	406	409	121	312
401943	chr2	236475721	236491563	AC012305.1	chr2	236046064	236053090	12	12	10	11.3333
401943	chr2	236475721	236491563	AC012305.1	chr2	236472548	236474278	78	36	52	55.3333
401943	chr2	236475721	236491563	AC012305.1	chr2	236651498	236665730	10	13	7	10
359115	chr2	96867770	96885100	AC012307.3	chr2	96859148	96866717	254	187	84	175
331118	chr19	54622003	54643157	AC012314.8	chr19	54647786	54653910	201	119	171	163.667
322526	chr19	14590371	14603445	AC012318.1	chr19	14531268	14540173	10	6	16	10.6667
345003	chr2	45147796	45150147	AC012354.1	chr2	44695164	44706618	57	46	13	38.6667
345003	chr2	45147796	45150147	AC012354.1	chr2	45153252	45154392	1439	1087	382	969.333
348241	chr2	55504703	55510852	AC012358.1	chr2	54984039	55001007	12	7	5	8
348241	chr2	55504703	55510852	AC012358.1	chr2	55495767	55495937	393	260	214	289
348218	chr2	55435744	55447208	AC012358.7	chr2	55449358	55452899	300	182	64	182
348249	chr2	55534347	55538238	AC012358.8	chr2	54778586	54791463	4	7	3	4.66667
348249	chr2	55534347	55538238	AC012358.8	chr2	55530837	55532157	685	433	142	420
361711	chr2	105988215	105992684	AC012360.6	chr2	105995298	105996296	842	467	287	532
361711	chr2	105988215	105992684	AC012360.6	chr2	107193750	107195648	8	7	5	6.66667
366091	chr2	120972997	120976985	AC012363.4	chr2	120143051	120154424	5	6	5	5.33333
366091	chr2	120972997	120976985	AC012363.4	chr2	120518270	120535663	17	11	5	11
366091	chr2	120972997	120976985	AC012363.4	chr2	120978858	120980397	822	365	233	473.333
335215	chr2	11862104	11866370	AC012456.3	chr2	11858851	11860801	1327	624	264	738.333
335215	chr2	11862104	11866370	AC012456.3	chr2	13131492	13136636	10	10	5	8.33333
335217	chr2	11885173	11887693	AC012456.4	chr2	11301504	11317773	10	10	4	8
335217	chr2	11885173	11887693	AC012456.4	chr2	11613579	11615878	16	18	13	15.6667
335217	chr2	11885173	11887693	AC012456.4	chr2	11893967	11903906	301	199	109	203
339270	chr2	25420261	25430720	AC012457.2	chr2	25196087	25207941	95	104	37	78.6667
402654	chr2	239206977	239210547	AC012485.2	chr2	239217775	239222941	435	359	136	310
402654	chr2	239206977	239210547	AC012485.2	chr2	239369679	239387385	29	35	22	28.6667
362628	chr2	109144635	109152181	AC012487.2	chr2	109158414	109166052	166	127	61	118
384130	chr2	178560531	178566375	AC012499.1	chr2	178567346	178567842	213	157	99	156.333
400779	chr2	231743647	231762017	AC012507.3	chr2	231741501	231743238	128	123	81	110.667
400782	chr2	231772014	231777477	AC012507.4	chr2	231762018	231780691	378	145	106	209.667
396458	chr2	217122614	217126407	AC012513.6	chr2	217119946	217121974	547	375	159	360.333
396458	chr2	217122614	217126407	AC012513.6	chr2	217516804	217528307	15	14	6	11.6667
381876	chr2	171206926	171209245	AC012594.1	chr2	171202104	171214319	678	397	170	415
381876	chr2	171206926	171209245	AC012594.1	chr2	171664027	171683603	58	43	19	40
381876	chr2	171206926	171209245	AC012594.1	chr2	172442513	172458624	4	3	2	3
263259	chr16	19603119	19613126	AC012621.1	chr16	19600100	19602433	1156	931	178	755
263259	chr16	19603119	19613126	AC012621.1	chr16	19887988	19894205	102	103	48	84.3333
263259	chr16	19603119	19613126	AC012621.1	chr16	20394389	20403851	23	35	19	25.6667
390480	chr2	198059736	198063912	AC013264.2	chr2	198056474	198067200	320	99	126	181.667
365887	chr2	120233357	120234537	AC013275.2	chr2	119774102	119784520	30	18	9	19
171846	chr12	98997010	99001205	AC013283.1	chr12	98990932	98996949	251	200	68	173
674837	chr7	44812016	44830988	AC013436.6	chr7	44808380	44811973	327	217	120	221.333
372928	chr2	143761781	143765376	AC013444.1	chr2	143429366	143438555	35	21	16	24
372928	chr2	143761781	143765376	AC013444.1	chr2	143758205	143771246	218	404	54	225.333
382707	chr2	173934854	173949207	AC013461.1	chr2	173952343	173953341	348	283	87	239.333
388056	chr2	190640564	190644188	AC013468.1	chr2	190924848	190939750	59	47	19	41.6667
388056	chr2	190640564	190644188	AC013468.1	chr2	191146166	191155397	10	17	9	12
339709	chr2	27231056	27232697	AC013472.4	chr2	27214154	27220123	226	259	101	195.333
344158	chr2	42181346	42185198	AC013480.1	chr2	42167996	42179539	200	108	68	125.333
344179	chr2	42250839	42255725	AC013480.2	chr2	41707228	41724853	8	5	6	6.33333
344179	chr2	42250839	42255725	AC013480.2	chr2	42248843	42263463	1295	351	621	755.667
360392	chr2	101744828	101752846	AC013722.1	chr2	101227041	101238166	3	4	4	3.66667
360392	chr2	101744828	101752846	AC013722.1	chr2	101742566	101742873	344	305	310	319.667
377864	chr2	158710443	158713813	AC013731.1	chr2	158172396	158183295	13	11	5	9.66667
377864	chr2	158710443	158713813	AC013731.1	chr2	158327486	158344256	13	11	5	9.66667
377864	chr2	158710443	158713813	AC013731.1	chr2	158700552	158704803	632	293	83	336
377864	chr2	158710443	158713813	AC013731.1	chr2	158860616	158865662	58	48	19	41.6667
732884	chr8	87669585	87678149	AC013751.1	chr8	87665437	87666490	81	23	48	50.6667
102840	chr11	2878924	2889769	AC013791.10	chr11	2558431	2573010	49	36	27	37.3333
102840	chr11	2878924	2889769	AC013791.10	chr11	2894689	2895792	358	151	134	214.333
747948	chr8	135604197	135611914	AC015599.1	chr8	135058439	135076472	14	13	5	10.6667
747948	chr8	135604197	135611914	AC015599.1	chr8	135602197	135620382	480	325	123	309.333
747948	chr8	135604197	135611914	AC015599.1	chr8	135888352	135898531	19	17	6	14
258387	chr15	100888624	100891243	AC015723.1	chr15	100891547	100894783	26	14	14	18
258387	chr15	100888624	100891243	AC015723.1	chr15	101110300	101111757	17	6	6	9.66667
280957	chr17	10783608	10791885	AC015908.1	chr17	10776675	10778108	426	420	137	327.667
280957	chr17	10783608	10791885	AC015908.1	chr17	11042198	11049022	72	72	25	56.3333
280957	chr17	10783608	10791885	AC015908.1	chr17	11541567	11556855	34	30	14	26
280957	chr17	10783608	10791885	AC015908.1	chr17	11839099	11852389	28	25	10	21
293056	chr17	61491614	61491812	AC015923.1	chr17	60734345	60748337	46	29	36	37
293056	chr17	61491614	61491812	AC015923.1	chr17	61155878	61164381	54	43	38	45
293056	chr17	61491614	61491812	AC015923.1	chr17	61486137	61488691	654	765	734	717.667
304285	chr18	25531042	25538289	AC015933.2	chr18	25544434	25548999	27	30	22	26.3333
339641	chr2	26893511	26897707	AC015977.6	chr2	26890850	26892695	101	83	100	94.6667
700848	chr7	135611431	135613304	AC015987.1	chr7	135606759	135614105	1186	729	120	678.333
315218	chr18	60488852	60513017	AC015989.1	chr18	60518272	60521460	230	184	49	154.333
722218	chr8	53949717	53958099	AC016113.1	chr8	53944134	53944817	309	178	89	192
722218	chr8	53949717	53958099	AC016113.1	chr8	54312518	54327473	10	8	8	8.66667
729422	chr8	76696203	76703622	AC016194.1	chr8	76707457	76713993	264	206	96	188.667
257134	chr15	96830894	96831899	AC016251.1	chr15	96824787	96833719	344	260	182	262
278915	chr17	1075669	1094570	AC016292.1	chr17	1095770	1096852	166	16	47	76.3333
744434	chr8	123849078	123876494	AC016405.1	chr8	123882359	123890236	96	85	52	77.6667
559119	chr5	13170732	13175258	AC016553.1	chr5	12713824	12716103	14	14	4	10.6667
559119	chr5	13170732	13175258	AC016553.1	chr5	13162928	13166194	360	296	74	243.333
559619	chr5	14906479	14911874	AC016575.1	chr5	14730041	14738920	22	26	14	20.6667
559619	chr5	14906479	14911874	AC016575.1	chr5	14915014	14918617	322	239	101	220.667
572253	chr5	56231243	56241729	AC016644.1	chr5	55556634	55560896	12	12	17	13.6667
572253	chr5	56231243	56241729	AC016644.1	chr5	56224650	56229898	292	392	58	247.333
355706	chr2	80470450	80474263	AC016670.1	chr2	80474394	80479191	646	401	217	421.333
363916	chr2	113922865	113938924	AC016683.5	chr2	113913286	113913602	41	18	47	35.3333
342928	chr2	38262015	38264301	AC016689.1	chr2	38269729	38272821	387	278	94	253
342928	chr2	38262015	38264301	AC016689.1	chr2	38503326	38511442	44	40	20	34.6667
393750	chr2	209118065	209122124	AC016697.3	chr2	208625317	208644804	9	11	10	10
393750	chr2	209118065	209122124	AC016697.3	chr2	209110019	209129298	414	198	114	242
372702	chr2	143069651	143072487	AC016706.1	chr2	143063211	143068550	433	283	158	291.333
372702	chr2	143069651	143072487	AC016706.1	chr2	143729385	143743366	5	7	3	5
355641	chr2	80254559	80259712	AC016716.2	chr2	80242332	80261086	320	459	363	380.667
345553	chr2	47078934	47085466	AC016722.3	chr2	46905547	46913076	72	73	23	56
345553	chr2	47078934	47085466	AC016722.3	chr2	47087848	47088197	480	410	422	437.333
381112	chr2	168797156	168798978	AC016723.4	chr2	168795781	168796585	368	290	144	267.333
365833	chr2	120001588	120012611	AC016736.2	chr2	120012702	120018638	142	100	61	101
360346	chr2	101593126	101596772	AC016738.3	chr2	101224961	101227040	54	22	52	42.6667
360346	chr2	101593126	101596772	AC016738.3	chr2	101335949	101347994	138	79	36	84.3333
383547	chr2	176753831	176772031	AC016751.3	chr2	176748921	176751680	113	90	42	81.6667
402624	chr2	239071229	239078324	AC016757.1	chr2	239087286	239087476	273	144	200	205.667
402642	chr2	239134204	239140787	AC016757.3	chr2	239123968	239133132	632	345	130	369
366294	chr2	121791158	121792988	AC016764.1	chr2	121783120	121795924	459	252	186	299
84141	chr10	71123308	71123624	AC016821.1	chr10	71121843	71122588	1151	677	546	791.333
340543	chr2	30272929	30289656	AC016907.1	chr2	30263670	30272791	80	72	70	74
340567	chr2	30360487	30371449	AC016907.3	chr2	30354228	30358167	930	515	228	557.667
340567	chr2	30360487	30371449	AC016907.3	chr2	30910564	30927301	24	21	4	16.3333
340567	chr2	30360487	30371449	AC016907.3	chr2	31535521	31545916	14	15	5	11.3333
369677	chr2	133668372	133676225	AC016909.1	chr2	133666107	133678706	217	254	84	185
373216	chr2	144693938	144696604	AC016910.1	chr2	144454155	144467245	53	39	21	37.6667
373216	chr2	144693938	144696604	AC016910.1	chr2	144688952	144702317	929	358	562	616.333
362101	chr2	107450623	107450921	AC016994.2	chr2	107442758	107453959	347	453	440	413.333
362101	chr2	107450623	107450921	AC016994.2	chr2	108394496	108402242	8	3	10	7
345328	chr2	46304451	46309557	AC017006.2	chr2	46292605	46311543	872	393	136	467
345328	chr2	46304451	46309557	AC017006.2	chr2	46582569	46594594	48	68	34	50
345348	chr2	46389475	46395336	AC017006.3	chr2	46381656	46400559	271	172	176	206.333
402862	chr2	240081688	240090513	AC017028.1	chr2	240074944	240076479	898	571	283	584
402862	chr2	240081688	240090513	AC017028.1	chr2	240927592	240936603	33	35	21	29.6667
333905	chr2	6970754	6982777	AC017076.5	chr2	6483960	6493921	12	10	5	9
352264	chr2	68454688	68458546	AC017083.1	chr2	69135572	69154531	5	6	4	5
352276	chr2	68499363	68503707	AC017083.2	chr2	68493845	68510110	890	610	176	558.667
352265	chr2	68458547	68461186	AC017083.3	chr2	68461489	68470616	328	240	119	229
352865	chr2	70678061	70686539	AC017084.1	chr2	70687532	70690404	1178	928	373	826.333
352865	chr2	70678061	70686539	AC017084.1	chr2	71147222	71156147	15	20	12	15.6667
400909	chr2	232316580	232318550	AC017104.2	chr2	232087517	232094110	191	131	62	128
400909	chr2	232316580	232318550	AC017104.2	chr2	232321430	232332442	1861	134	91	695.333
479226	chr3	142882975	142887640	AC018450.1	chr3	142875430	142881146	815	633	153	533.667
239155	chr15	33249877	33256595	AC018515.1	chr15	32948714	32953084	79	144	58	93.6667
239155	chr15	33249877	33256595	AC018515.1	chr15	33132810	33135013	94	67	34	65
239155	chr15	33249877	33256595	AC018515.1	chr15	33268451	33269883	220	159	57	145.333
266914	chr16	34679928	34683109	AC018558.1	chr16	34671804	34675019	383	291	95	256.333
292694	chr17	60089008	60102448	AC018628.1	chr17	60077580	60079028	213	194	79	162
699535	chr7	131010766	131014763	AC018642.1	chr7	130789769	130799939	68	57	52	59
699535	chr7	131010766	131014763	AC018642.1	chr7	131003994	131023103	473	346	112	310.333
699794	chr7	131943941	131947790	AC018643.4	chr7	131948310	131956041	94	83	66	81
374302	chr2	147889185	147892764	AC018678.1	chr2	147885683	147887507	553	454	201	402.667
374302	chr2	147889185	147892764	AC018678.1	chr2	148647174	148656714	23	20	6	16.3333
345424	chr2	46655549	46657113	AC018682.6	chr2	46667091	46667527	181	143	56	126.667
359967	chr2	100113943	100156231	AC018690.1	chr2	100160335	100167486	228	111	67	135.333
343143	chr2	39088831	39090117	AC018693.6	chr2	38394166	38408608	3	3	2	2.66667
343143	chr2	39088831	39090117	AC018693.6	chr2	39074302	39081661	298	258	128	228
343143	chr2	39088831	39090117	AC018693.6	chr2	39449122	39453148	23	12	11	15.3333
676445	chr7	50592159	50601327	AC018705.5	chr7	50601846	50612665	9	6	8	7.66667
361565	chr2	105466818	105475583	AC018730.1	chr2	105057791	105070029	44	18	38	33.3333
330583	chr19	52089926	52098767	AC018755.11	chr19	52087690	52089281	572	448	195	405
387032	chr2	187359727	187364693	AC018867.1	chr2	186903729	186920528	7	9	4	6.66667
387032	chr2	187359727	187364693	AC018867.1	chr2	187366424	187370577	550	474	172	398.667
387032	chr2	187359727	187364693	AC018867.1	chr2	187709461	187710878	16	13	6	11.6667
361926	chr2	106795423	106796052	AC018878.3	chr2	106787211	106791761	645	414	202	420.333
333985	chr2	7217303	7221612	AC019048.1	chr2	7030226	7043211	22	28	14	21.3333
333985	chr2	7217303	7221612	AC019048.1	chr2	7209897	7214782	437	289	169	298.333
675603	chr7	47800071	47804453	AC019066.3	chr7	47806336	47814994	460	361	128	316.333
402141	chr2	237296564	237304237	AC019068.2	chr2	237306671	237314185	207	203	106	172
402141	chr2	237296564	237304237	AC019068.2	chr2	237945433	237963366	15	13	8	12
362535	chr2	108833744	108836074	AC019100.3	chr2	108842528	108843128	486	400	122	336
526103	chr4	99846712	99851952	AC019131.1	chr4	99171385	99184706	47	19	10	25.3333
526103	chr4	99846712	99851952	AC019131.1	chr4	99376235	99392415	43	69	32	48
526103	chr4	99846712	99851952	AC019131.1	chr4	99580403	99585871	31	28	18	25.6667
526103	chr4	99846712	99851952	AC019131.1	chr4	99842117	99845607	508	545	196	416.333
380114	chr2	165693725	165698989	AC019181.2	chr2	165688788	165693150	226	204	44	158
377739	chr2	158296257	158299768	AC019201.1	chr2	158177590	158188249	158	71	26	85
377739	chr2	158296257	158299768	AC019201.1	chr2	158290931	158292036	745	542	146	477.667
377739	chr2	158296257	158299768	AC019201.1	chr2	158865663	158874407	10	19	8	12.3333
287489	chr17	39649147	39660161	AC019349.5	chr17	39064987	39072965	15	7	12	11.3333
287489	chr17	39649147	39660161	AC019349.5	chr17	39660237	39664326	51	47	79	59
341543	chr2	33788111	33788883	AC020594.5	chr2	32996155	33001314	11	16	6	11
341543	chr2	33788111	33788883	AC020594.5	chr2	33789587	33796820	775	515	245	511.667
341543	chr2	33788111	33788883	AC020594.5	chr2	34125373	34138856	5	5	2	4
443967	chr3	23808200	23812125	AC020626.1	chr3	23006544	23024951	12	18	5	11.6667
443967	chr3	23808200	23812125	AC020626.1	chr3	23261502	23265156	18	24	5	15.6667
443967	chr3	23808200	23812125	AC020626.1	chr3	23816719	23833516	153	181	136	156.667
481794	chr3	150635201	150636310	AC020636.1	chr3	150632416	150643439	1294	963	403	886.667
481794	chr3	150635201	150636310	AC020636.1	chr3	150845163	150859842	67	68	30	55
481794	chr3	150635201	150636310	AC020636.1	chr3	151136716	151156162	12	9	2	7.66667
543852	chr4	154792622	154798776	AC020703.1	chr4	154799013	154812092	610	475	150	411.667
676327	chr7	50175558	50188164	AC020743.2	chr7	50739465	50744252	13	24	16	17.6667
273813	chr16	70779902	70791759	AC020763.1	chr16	70794120	70795672	599	329	263	397
273813	chr16	70779902	70791759	AC020763.1	chr16	71503306	71518104	9	7	10	8.66667
584894	chr5	95919184	95927048	AC020900.1	chr5	95215458	95232733	13	19	5	12.3333
584894	chr5	95919184	95927048	AC020900.1	chr5	95928967	95936473	189	148	64	133.667
331331	chr19	55892329	55898826	AC020922.1	chr19	55900438	55904871	597	528	229	451.333
157136	chr12	52641149	52659404	AC021066.1	chr12	52665279	52665687	299	170	142	203.667
601303	chr5	148978642	148996459	AC021078.1	chr5	149360139	149363218	23	24	10	19
359137	chr2	96986565	96990459	AC021188.4	chr2	97002287	97008828	674	528	227	476.333
706512	chr7	155755323	155756273	AC021218.2	chr7	155757904	155763205	237	166	191	198
706512	chr7	155755323	155756273	AC021218.2	chr7	156582671	156601754	4	3	4	3.66667
249936	chr15	70069866	70077900	AC021818.1	chr15	70079155	70079963	63	51	40	51.3333
72602	chr10	28596640	28600773	AC022021.1	chr10	27814879	27834371	8	10	9	9
72602	chr10	28596640	28600773	AC022021.1	chr10	28601051	28607307	377	468	166	337
322481	chr19	14170311	14187744	AC022098.1	chr19	14189448	14196473	33	20	14	22.3333
604808	chr5	160656676	160657354	AC022120.1	chr5	160658183	160660551	270	181	125	192
585597	chr5	97974926	97975107	AC022142.1	chr5	96597763	96604139	22	19	5	15.3333
585597	chr5	97974926	97975107	AC022142.1	chr5	97180733	97198723	23	11	6	13.3333
585597	chr5	97974926	97975107	AC022142.1	chr5	97281240	97288007	17	19	8	14.6667
585597	chr5	97974926	97975107	AC022142.1	chr5	97503771	97517833	17	13	9	13
585597	chr5	97974926	97975107	AC022142.1	chr5	97969768	97970026	826	512	337	558.333
328088	chr19	38028682	38042885	AC022148.1	chr19	38024565	38028144	198	202	69	156.333
701523	chr7	137636045	137645086	AC022173.2	chr7	137331828	137347953	11	5	9	8.33333
701523	chr7	137636045	137645086	AC022173.2	chr7	137633112	137634388	444	188	115	249
701523	chr7	137636045	137645086	AC022173.2	chr7	138153115	138165591	5	2	3	3.33333
322186	chr19	12162841	12171530	AC022415.4	chr19	11904541	11908075	19	19	17	18.3333
322186	chr19	12162841	12171530	AC022415.4	chr19	11993788	11995107	27	27	18	24
322186	chr19	12162841	12171530	AC022415.4	chr19	12155576	12157059	156	142	64	120.667
322205	chr19	12262669	12269340	AC022415.5	chr19	11993788	11995550	23	11	18	17.3333
322205	chr19	12262669	12269340	AC022415.5	chr19	12256018	12256716	210	138	116	154.667
572142	chr5	55901742	55902125	AC022431.2	chr5	55897503	55906099	734	807	590	710.333
493457	chr3	187889620	187901214	AC022498.1	chr3	188671088	188677383	24	19	7	16.6667
84386	chr10	72191639	72194631	AC022532.1	chr10	71986810	71991897	42	39	19	33.3333
84386	chr10	72191639	72194631	AC022532.1	chr10	72513967	72533131	33	21	11	21.6667
83094	chr10	67465854	67473870	AC022538.1	chr10	66970778	66982368	10	5	7	7.33333
83094	chr10	67465854	67473870	AC022538.1	chr10	67476847	67485577	432	219	46	232.333
258206	chr15	100257875	100263888	AC022692.1	chr15	100265274	100269324	45	43	42	43.3333
726862	chr8	68623660	68626675	AC022861.1	chr8	68221563	68235927	8	14	4	8.66667
726862	chr8	68623660	68626675	AC022861.1	chr8	69146904	69152534	8	6	3	5.66667
250599	chr15	72339044	72344992	AC022872.1	chr15	72333323	72337095	668	318	117	367.667
258642	chr15	101816805	101818647	AC023024.1	chr15	101561702	101576592	36	45	26	35.6667
258642	chr15	101816805	101818647	AC023024.1	chr15	101810931	101815370	716	437	235	462.667
258642	chr15	101816805	101818647	AC023024.1	chr15	102179537	102192118	65	57	28	50
151332	chr12	32052599	32069592	AC023050.1	chr12	32070817	32071847	271	398	83	250.667
724625	chr8	61604423	61604944	AC023102.1	chr8	61607414	61610707	551	324	257	377.333
710112	chr8	9944105	9953342	AC023385.1	chr8	9954730	9973678	235	659	171	355
375670	chr2	151904591	151906592	AC023469.1	chr2	151457193	151468477	17	15	8	13.3333
375670	chr2	151904591	151906592	AC023469.1	chr2	151899826	151909516	385	230	132	249
375640	chr2	151836635	151846615	AC023469.2	chr2	151482077	151501712	8	6	6	6.66667
375640	chr2	151836635	151846615	AC023469.2	chr2	151829861	151835553	278	127	86	163.667
149093	chr12	25157789	25161205	AC023510.1	chr12	25162420	25167420	383	308	92	261
154376	chr12	42465506	42487837	AC023513.1	chr12	42073381	42078369	21	13	9	14.3333
742924	chr8	119292651	119294751	AC023590.1	chr8	118534547	118543484	16	12	4	10.6667
742924	chr8	119292651	119294751	AC023590.1	chr8	118899145	118907256	51	32	10	31
742924	chr8	119292651	119294751	AC023590.1	chr8	119297654	119298885	1124	732	316	724
474737	chr3	127381579	127388663	AC023593.1	chr3	127375071	127377633	401	363	342	368.667
474737	chr3	127381579	127388663	AC023593.1	chr3	127678848	127688403	56	45	32	44.3333
496054	chr3	196359104	196362168	AC023797.1	chr3	196060402	196072891	12	5	8	8.33333
496054	chr3	196359104	196362168	AC023797.1	chr3	196351848	196356134	424	54	127	201.667
443378	chr3	21871007	21871666	AC023798.1	chr3	21876409	21888377	236	185	42	154.333
267666	chr16	48438126	48458019	AC023818.1	chr16	48427942	48428546	115	142	46	101
438019	chr3	3684100	3692160	AC024158.1	chr3	3694764	3697285	760	626	190	525.333
438019	chr3	3684100	3692160	AC024158.1	chr3	4039443	4055784	20	23	17	20
438019	chr3	3684100	3692160	AC024158.1	chr3	4320206	4328884	44	25	13	27.3333
438276	chr3	4529815	4535454	AC024168.2	chr3	4523503	4527876	465	223	131	273
529987	chr4	111774326	111779159	AC024198.1	chr4	111781077	111783865	460	262	195	305.667
706125	chr7	154401097	154403856	AC024239.1	chr7	154404307	154406121	318	262	126	235.333
253577	chr15	83875407	83891067	AC024270.1	chr15	83865039	83870248	155	125	82	120.667
578945	chr5	77347429	77357513	AC024568.1	chr5	76842123	76853353	24	28	5	19
578945	chr5	77347429	77357513	AC024568.1	chr5	77357951	77358423	526	346	99	323.667
285696	chr17	32191778	32206026	AC024610.1	chr17	32178239	32189016	58	70	60	62.6667
151202	chr12	31476368	31479637	AC024940.1	chr12	31470520	31473143	689	521	227	479
275194	chr16	75731697	75740650	AC025287.1	chr16	75741413	75741737	37	20	38	31.6667
565207	chr5	33277548	33284831	AC025472.1	chr5	32705287	32710536	20	11	4	11.6667
565207	chr5	33277548	33284831	AC025472.1	chr5	33287852	33290323	423	348	98	289.667
453107	chr3	55685417	55693139	AC025572.1	chr3	55697308	55698410	215	169	91	158.333
160569	chr12	64495191	64497303	AC025576.1	chr12	64493509	64494136	543	391	120	351.333
246900	chr15	59179669	59185922	AC025918.2	chr15	58526160	58544230	26	13	10	16.3333
246900	chr15	59179669	59185922	AC025918.2	chr15	59186625	59187545	562	395	152	369.667
246900	chr15	59179669	59185922	AC025918.2	chr15	59945115	59956422	11	9	4	8
438481	chr3	5228182	5235779	AC026202.3	chr3	4753010	4763161	22	33	6	20.3333
151673	chr12	33194147	33213965	AC026357.1	chr12	33190355	33194066	310	260	59	209.667
151673	chr12	33194147	33213965	AC026357.1	chr12	34141766	34156707	17	15	5	12.3333
151673	chr12	33194147	33213965	AC026357.1	chr12	34566622	34576456	6	2	3	3.66667
581301	chr5	84823412	84825128	AC026700.1	chr5	84817729	84821570	339	293	126	252.667
556398	chr5	4297737	4306828	AC026711.1	chr5	4290626	4296598	377	275	121	257.667
583602	chr5	92051477	92053230	AC026781.1	chr5	92049978	92050654	111	135	38	94.6667
556981	chr5	6111603	6119622	AC026797.1	chr5	6121433	6122431	205	164	81	150
565711	chr5	34793158	34802761	AC026801.2	chr5	34790113	34809856	421	542	166	376.333
459584	chr3	76466794	76471364	AC026877.1	chr3	76472310	76478598	154	97	63	104.667
253171	chr15	82335167	82338934	AC026956.1	chr15	82229707	82244785	78	76	23	59
253171	chr15	82335167	82338934	AC026956.1	chr15	82323796	82324699	277	229	85	197
280717	chr17	9720720	9726801	AC027045.1	chr17	9728912	9737259	8	8	14	10
743887	chr8	122195647	122200017	AC027238.1	chr8	122200980	122202362	681	448	210	446.333
273841	chr16	70905383	70907438	AC027281.1	chr16	70907620	70909505	1456	1096	420	990.667
273841	chr16	70905383	70907438	AC027281.1	chr16	71169906	71178914	18	14	13	15
321023	chr19	4883838	4891029	AC027319.1	chr19	4913070	4929724	24	26	31	27
280141	chr17	6907157	6920155	AC027763.2	chr17	6564954	6570200	23	15	9	15.6667
280141	chr17	6907157	6920155	AC027763.2	chr17	6902013	6906113	266	161	175	200.667
253815	chr15	84652681	84659759	AC027807.1	chr15	84647930	84664636	437	340	147	308
525642	chr4	98402897	98412896	AC034154.1	chr4	97753617	97757695	10	6	5	7
525642	chr4	98402897	98412896	AC034154.1	chr4	98415246	98415433	512	381	323	405.333
601753	chr5	150747876	150751086	AC034205.1	chr5	150739673	150745061	646	399	142	395.667
596241	chr5	131346228	131348836	AC034228.2	chr5	130766034	130784767	13	14	10	12.3333
596241	chr5	131346228	131348836	AC034228.2	chr5	131039943	131050401	54	13	13	26.6667
596239	chr5	131338044	131341756	AC034228.3	chr5	130764077	130773407	18	8	11	12.3333
596239	chr5	131338044	131341756	AC034228.3	chr5	130922554	130928481	58	34	33	41.6667
596239	chr5	131338044	131341756	AC034228.3	chr5	131044288	131050401	37	46	36	39.6667
596239	chr5	131338044	131341756	AC034228.3	chr5	131337079	131337290	430	300	473	401
596214	chr5	131268217	131282809	AC034228.4	chr5	131260604	131265850	244	274	66	194.667
591099	chr5	115378790	115379689	AC034236.1	chr5	115374017	115388520	472	202	80	251.333
591095	chr5	115356251	115372004	AC034236.2	chr5	114614590	114629206	5	4	2	3.66667
591095	chr5	115356251	115372004	AC034236.2	chr5	114979226	114993582	21	18	3	14
591095	chr5	115356251	115372004	AC034236.2	chr5	115374017	115375901	267	211	104	194
598088	chr5	138085055	138091406	AC034243.1	chr5	138078382	138084249	378	317	135	276.667
302299	chr18	18635617	18642649	AC036178.1	chr18	18643550	18643728	980	658	505	714.333
292982	chr17	61274653	61275321	AC037445.1	chr17	61275342	61278380	898	519	257	558
273211	chr16	67911016	67912047	AC040162.1	chr16	67916071	67917947	790	236	337	454.333
270739	chr16	59446558	59448694	AC040163.1	chr16	59444585	59460740	228	92	79	133
495562	chr3	194303099	194309010	AC046143.5	chr3	194315567	194317209	253	146	18	139
723141	chr8	56948717	56962004	AC046176.1	chr8	55653314	55669080	3	6	2	3.66667
723141	chr8	56948717	56962004	AC046176.1	chr8	56708596	56719846	35	39	37	37
723141	chr8	56948717	56962004	AC046176.1	chr8	56966771	56977211	153	114	138	135
714052	chr8	23424387	23432475	AC051642.1	chr8	23421952	23436385	363	864	334	520.333
714052	chr8	23424387	23432475	AC051642.1	chr8	24066200	24082145	14	15	6	11.6667
102687	chr11	2005194	2023179	AC051649.7	chr11	1719887	1726469	54	32	28	38
397295	chr2	220285999	220296217	AC053503.6	chr2	219552432	219567777	9	7	2	6
397295	chr2	220285999	220296217	AC053503.6	chr2	220281350	220282393	610	339	248	399
533797	chr4	123537947	123541498	AC053545.3	chr4	123533137	123537856	677	444	156	425.667
480172	chr3	145614897	145620836	AC055758.1	chr3	145609970	145624813	499	326	106	310.333
496367	chr3	197556482	197564315	AC055764.1	chr3	197568581	197569420	398	303	164	288.333
287919	chr17	41825537	41827515	AC055813.1	chr17	41829311	41830174	734	555	351	546.667
538556	chr4	138149141	138151594	AC060835.1	chr4	138153750	138166922	10	5	4	6.33333
376842	chr2	155538447	155554993	AC061961.2	chr2	155556747	155558879	80	56	36	57.3333
296800	chr17	76309328	76312541	AC061992.2	chr17	76301432	76307691	151	41	98	96.6667
468478	chr3	107081833	107093293	AC063944.1	chr3	107100022	107103084	377	297	82	252
169924	chr12	92814194	92815377	AC063949.1	chr12	91968899	91975182	6	7	3	5.33333
169924	chr12	92814194	92815377	AC063949.1	chr12	92213553	92220657	6	11	4	7
169924	chr12	92814194	92815377	AC063949.1	chr12	92826492	92827852	118	87	58	87.6667
596281	chr5	131516144	131526401	AC063976.4	chr5	131528268	131539954	232	168	171	190.333
596281	chr5	131516144	131526401	AC063976.4	chr5	132676373	132682229	5	2	2	3
330504	chr19	51666063	51674037	AC063977.1	chr19	51761256	51762745	53	56	34	47.6667
385885	chr2	183973141	183974244	AC064871.3	chr2	183974851	183979998	304	255	52	203.667
401989	chr2	236691274	236695891	AC064874.1	chr2	236684094	236700958	456	116	229	267
401989	chr2	236691274	236695891	AC064874.1	chr2	237077831	237084652	43	56	38	45.6667
401989	chr2	236691274	236695891	AC064874.1	chr2	237973253	237976503	15	13	13	13.6667
364532	chr2	115913220	115921819	AC066593.1	chr2	115921898	115924456	528	195	105	276
494097	chr3	189856883	189862740	AC067718.1	chr3	189867936	189868841	290	261	75	208.667
81983	chr10	63684545	63688453	AC067742.1	chr10	63688504	63693656	528	422	132	360.667
81983	chr10	63684545	63688453	AC067742.1	chr10	63992842	64008052	26	10	5	13.6667
388463	chr2	191877639	191893225	AC067945.2	chr2	191894367	191896132	495	346	175	338.667
388463	chr2	191877639	191893225	AC067945.2	chr2	192243697	192244197	5	8	7	6.66667
344954	chr2	45009025	45016067	AC067957.1	chr2	44704987	44708881	26	19	8	17.6667
344954	chr2	45009025	45016067	AC067957.1	chr2	45017910	45021292	434	307	203	314.667
382342	chr2	172626475	172635456	AC068039.4	chr2	172637224	172639722	28	14	13	18.3333
382342	chr2	172626475	172635456	AC068039.4	chr2	172954154	172963112	26	33	10	23
99947	chr10	125668607	125671456	AC068058.1	chr10	125661587	125673263	109	62	76	82.3333
381872	chr2	171196248	171202103	AC068280.1	chr2	171187076	171203692	300	292	116	236
381872	chr2	171196248	171202103	AC068280.1	chr2	171675882	171683603	40	36	9	28.3333
333079	chr2	4267389	4278492	AC068292.1	chr2	4264333	4266008	544	365	170	359.667
333079	chr2	4267389	4278492	AC068292.1	chr2	5120145	5137910	6	6	3	5
709626	chr8	8238661	8248628	AC068353.1	chr8	8233683	8237389	1799	1145	489	1144.33
709626	chr8	8238661	8248628	AC068353.1	chr8	8402979	8411817	129	127	65	107
709626	chr8	8238661	8248628	AC068353.1	chr8	8853653	8863391	38	44	10	30.6667
320317	chr18	77421105	77447969	AC068473.1	chr18	77148521	77162996	14	3	5	7.33333
320317	chr18	77421105	77447969	AC068473.1	chr18	77451114	77458928	150	49	64	87.6667
306561	chr18	32392811	32401125	AC068506.1	chr18	31683961	31702377	37	42	7	28.6667
306561	chr18	32392811	32401125	AC068506.1	chr18	32387853	32390110	600	474	126	400
364436	chr2	115582385	115598189	AC068542.1	chr2	115575446	115576776	224	180	82	162
746216	chr8	129821061	129833018	AC068570.1	chr8	128740188	128758566	19	14	5	12.6667
746216	chr8	129821061	129833018	AC068570.1	chr8	129834258	129839974	693	669	168	510
173309	chr12	103614315	103637450	AC068643.1	chr12	103608582	103611484	311	245	108	221.333
383691	chr2	177244837	177252725	AC068706.1	chr2	177244481	177244796	207	130	94	143.667
473287	chr3	122000412	122001729	AC068754.1	chr3	121822381	121839860	23	17	10	16.6667
473287	chr3	122000412	122001729	AC068754.1	chr3	121993904	122006749	524	313	163	333.333
176945	chr12	117705814	117723821	AC068799.1	chr12	117726260	117727527	277	245	106	209.333
176945	chr12	117705814	117723821	AC068799.1	chr12	118023582	118038568	13	29	14	18.6667
176945	chr12	117705814	117723821	AC068799.1	chr12	118261163	118264369	12	19	4	11.6667
255575	chr15	91477137	91484708	AC068831.3	chr15	91183351	91196098	31	32	14	25.6667
255575	chr15	91477137	91484708	AC068831.3	chr15	91472838	91475551	487	162	172	273.667
255575	chr15	91477137	91484708	AC068831.3	chr15	91808917	91813633	18	9	11	12.6667
255583	chr15	91509387	91510054	AC068831.8	chr15	91516127	91518812	769	617	235	540.333
255583	chr15	91509387	91510054	AC068831.8	chr15	91808917	91815399	61	59	27	49
482025	chr3	151349921	151356323	AC069067.1	chr3	151184901	151190703	47	61	29	45.6667
482025	chr3	151349921	151356323	AC069067.1	chr3	151345291	151349228	404	314	83	267
252377	chr15	79400377	79407603	AC069082.1	chr15	79415882	79416178	184	141	123	149.333
377951	chr2	159022782	159028219	AC069146.2	chr2	159029052	159031440	802	548	180	510
377951	chr2	159022782	159028219	AC069146.2	chr2	159597964	159604007	102	38	36	58.6667
365898	chr2	120301141	120311680	AC069154.2	chr2	120890362	120909696	9	8	5	7.33333
495931	chr3	195963352	195978341	AC069257.8	chr3	195960518	195962453	691	253	131	358.333
495931	chr3	195963352	195978341	AC069257.8	chr3	196210019	196213609	32	35	12	26.3333
662368	chr7	3445945	3459460	AC069286.1	chr7	3459649	3460678	310	232	135	225.667
662368	chr7	3445945	3459460	AC069286.1	chr7	3898315	3914427	14	12	6	10.6667
690067	chr7	99302700	99310897	AC069294.1	chr7	99293427	99296517	76	40	36	50.6667
705095	chr7	150280112	150283829	AC069304.1	chr7	150152679	150162329	98	97	25	73.3333
286345	chr17	34405627	34410796	AC069363.1	chr17	34303632	34306966	116	94	50	86.6667
286345	chr17	34405627	34410796	AC069363.1	chr17	34399130	34404284	593	581	164	446
286345	chr17	34405627	34410796	AC069363.1	chr17	35471645	35486246	2	2	2	2
248615	chr15	65130647	65137299	AC069368.3	chr15	65128476	65129851	466	348	210	341.333
248615	chr15	65130647	65137299	AC069368.3	chr15	65568038	65573227	4	10	6	6.66667
397188	chr2	219793126	219799268	AC073128.10	chr2	219789857	219790817	284	192	94	190
694906	chr7	115967531	115969615	AC073130.3	chr7	115971971	115977738	929	459	246	544.667
694906	chr7	115967531	115969615	AC073130.3	chr7	116416141	116428489	10	20	5	11.6667
401154	chr2	233449164	233457454	AC073254.1	chr2	233457809	233460541	515	346	218	359.667
340639	chr2	30654269	30656625	AC073255.1	chr2	30646643	30650273	476	402	163	347
353832	chr2	74361314	74362538	AC073263.1	chr2	74352611	74366446	699	473	215	462.333
345612	chr2	47292124	47300128	AC073283.7	chr2	46869419	46872079	14	8	4	8.66667
345612	chr2	47292124	47300128	AC073283.7	chr2	47512194	47524238	60	52	13	41.6667
345612	chr2	47292124	47300128	AC073283.7	chr2	48001802	48013280	3	4	3	3.33333
666287	chr7	16755654	16766587	AC073333.8	chr7	16770673	16774015	45	37	23	35
702925	chr7	142977819	142989457	AC073342.12	chr7	142698831	142711125	14	7	13	11.3333
702925	chr7	142977819	142989457	AC073342.12	chr7	142989567	142991185	311	343	162	272
663042	chr7	6713226	6713790	AC073343.1	chr7	6716755	6722092	1433	1136	343	970.667
693863	chr7	112749478	112761357	AC073346.2	chr7	112745916	112765513	325	372	132	276.333
693985	chr7	113090855	113091667	AC073348.1	chr7	112365525	112382120	8	11	12	10.3333
693985	chr7	113090855	113091667	AC073348.1	chr7	113089205	113097109	748	478	307	511
97734	chr10	117874268	117880882	AC073588.1	chr10	117196372	117216276	6	9	5	6.66667
97734	chr10	117874268	117880882	AC073588.1	chr10	117553048	117556650	12	17	8	12.3333
97734	chr10	117874268	117880882	AC073588.1	chr10	117870974	117885370	324	271	110	235
789572	chrX	16393742	16396904	AC073597.1	chrX	16391314	16406218	77	63	50	63.3333
156385	chr12	49349427	49359771	AC073610.1	chr12	49629084	49636909	6	10	7	7.66667
156382	chr12	49333266	49336024	AC073610.5	chr12	49327658	49329205	257	187	108	184
296936	chr17	77021883	77025543	AC073624.1	chr17	77378304	77393682	27	36	24	29
398675	chr2	224824290	224834357	AC073641.2	chr2	225142020	225157172	7	11	6	8
698602	chr7	127289511	127298661	AC073934.6	chr7	127318070	127318814	282	198	84	188
698602	chr7	127289511	127298661	AC073934.6	chr7	127848505	127853295	37	51	12	33.3333
661961	chr7	1065596	1082452	AC073957.15	chr7	1084762	1087408	413	229	228	290
340130	chr2	28884399	28889659	AC074011.2	chr2	27946202	27952335	4	9	6	6.33333
340130	chr2	28884399	28889659	AC074011.2	chr2	28881642	28894469	1115	1014	441	856.667
339846	chr2	27803057	27808708	AC074091.1	chr2	27798271	27812555	802	492	165	486.333
339877	chr2	27937293	27939466	AC074091.13	chr2	27927708	27935427	484	97	230	270.333
339877	chr2	27937293	27939466	AC074091.13	chr2	28625916	28639688	21	17	13	17
566793	chr5	38081824	38083520	AC074129.1	chr5	38080362	38085434	633	327	113	357.667
327872	chr19	37177995	37182425	AC074138.3	chr19	36694821	36698997	16	7	8	10.3333
327872	chr19	37177995	37182425	AC074138.3	chr19	37175224	37176963	890	305	213	469.333
329646	chr19	46234256	46237240	AC074212.3	chr19	46237393	46247291	245	75	98	139.333
343114	chr2	38898412	38909430	AC074366.3	chr2	38915796	38920774	157	144	69	123.333
662053	chr7	1725636	1738329	AC074389.6	chr7	1740465	1747974	572	485	234	430.333
662053	chr7	1725636	1738329	AC074389.6	chr7	2227615	2228230	29	28	20	25.6667
351565	chr2	66267516	66273866	AC074391.1	chr2	66264710	66277603	104	83	116	101
470362	chr3	112809412	112816861	AC078785.1	chr3	112992469	113008767	105	114	23	80.6667
470362	chr3	112809412	112816861	AC078785.1	chr3	113311877	113323523	18	19	11	16
173530	chr12	104371119	104380113	AC078819.2	chr12	104361086	104370716	200	209	79	162.667
371895	chr2	140576543	140584459	AC078851.1	chr2	140569969	140573539	39	46	16	33.6667
468812	chr3	108038255	108039759	AC078855.1	chr3	107383930	107399514	17	10	10	12.3333
468812	chr3	108038255	108039759	AC078855.1	chr3	107649062	107665897	16	21	6	14.3333
468812	chr3	108038255	108039759	AC078855.1	chr3	108040513	108043145	843	781	300	641.333
551532	chr4	178463156	178484989	AC078881.1	chr4	178163883	178168602	8	6	7	7
382540	chr2	173322334	173335974	AC078883.3	chr2	173320118	173336525	678	135	128	313.667
323516	chr19	20470309	20485019	AC078899.1	chr19	20788714	20805785	8	4	4	5.33333
165619	chr12	79740605	79743724	AC078917.1	chr12	78382125	78396201	12	4	6	7.33333
165619	chr12	79740605	79743724	AC078917.1	chr12	78550791	78560595	21	5	8	11.3333
165619	chr12	79740605	79743724	AC078917.1	chr12	79734916	79754473	227	323	132	227.333
707119	chr7	158326446	158334419	AC078942.1	chr7	158343545	158358757	118	55	52	75
488572	chr3	171524708	171529566	AC078953.1	chr3	171529628	171532213	599	376	76	350.333
488572	chr3	171524708	171529566	AC078953.1	chr3	171849393	171859972	14	29	10	17.6667
789546	chrX	16314814	16317457	AC078993.1	chrX	16308722	16324238	198	136	50	128
553577	chr4	185188446	185189692	AC079080.1	chr4	185192718	185199986	545	353	117	338.333
553577	chr4	185188446	185189692	AC079080.1	chr4	185548768	185555510	47	51	14	37.3333
727527	chr8	70739602	70747761	AC079089.1	chr8	69480591	69497550	6	7	8	7
282725	chr17	16978636	16983801	AC079111.1	chr17	16988246	16990532	386	258	185	276.333
354689	chr2	77208622	77216846	AC079117.1	chr2	77221599	77224909	297	201	68	188.667
398493	chr2	224263734	224266318	AC079120.1	chr2	223054764	223071555	3	5	3	3.66667
398493	chr2	224263734	224266318	AC079120.1	chr2	223843289	223857085	12	6	4	7.33333
398493	chr2	224263734	224266318	AC079120.1	chr2	224261125	224262453	405	184	82	223.667
398493	chr2	224263734	224266318	AC079120.1	chr2	224476007	224493473	17	15	13	15
402089	chr2	237072120	237077830	AC079135.1	chr2	236684094	236691273	37	41	16	31.3333
402089	chr2	237072120	237077830	AC079135.1	chr2	236841809	236853727	22	44	12	26
402089	chr2	237072120	237077830	AC079135.1	chr2	237083864	237084652	487	294	175	318.667
367163	chr2	124782517	124786838	AC079154.1	chr2	124779856	124791415	693	458	159	436.667
399647	chr2	227987154	227989282	AC079235.1	chr2	227998096	228002687	190	168	61	139.667
399647	chr2	227987154	227989282	AC079235.1	chr2	228748405	228755005	8	5	4	5.66667
383979	chr2	178125221	178130928	AC079305.10	chr2	178132425	178137694	681	591	486	586
383979	chr2	178125221	178130928	AC079305.10	chr2	178584985	178590017	21	19	8	16
533539	chr4	122684930	122690839	AC079341.1	chr4	122395275	122398188	39	45	13	32.3333
391924	chr2	202934826	202940082	AC079354.1	chr2	202941183	202950556	207	182	135	174.667
391938	chr2	202980380	202985289	AC079354.3	chr2	202989826	202995350	349	365	267	327
346189	chr2	49285223	49292457	AC079394.1	chr2	49295409	49299595	386	245	102	244.333
346189	chr2	49285223	49292457	AC079394.1	chr2	49863643	49878314	4	5	4	4.33333
575701	chr5	66758677	66760941	AC079467.1	chr5	66432768	66439571	9	12	12	11
575701	chr5	66758677	66760941	AC079467.1	chr5	66750725	66755117	661	448	128	412.333
575701	chr5	66758677	66760941	AC079467.1	chr5	67539692	67558031	23	21	12	18.6667
575701	chr5	66758677	66760941	AC079467.1	chr5	67779124	67795840	12	13	4	9.66667
166800	chr12	83384835	83405777	AC079595.1	chr12	82919667	82921703	14	11	11	12
166800	chr12	83384835	83405777	AC079595.1	chr12	83381703	83381904	346	211	181	246
166800	chr12	83384835	83405777	AC079595.1	chr12	84204158	84213324	5	8	5	6
154748	chr12	43683570	43685885	AC079603.1	chr12	43677714	43689899	376	289	132	265.667
402930	chr2	240498105	240505607	AC079612.1	chr2	240489044	240492650	349	176	167	230.667
363819	chr2	113594484	113606655	AC079753.1	chr2	113590305	113592712	732	576	236	514.667
332068	chr2	283104	287292	AC079779.4	chr2	274456	281360	429	371	133	311
332043	chr2	196807	199069	AC079779.7	chr2	193264	194543	341	203	120	221.333
375973	chr2	152951975	152959709	AC079790.2	chr2	152945898	152946610	585	404	128	372.333
375973	chr2	152951975	152959709	AC079790.2	chr2	153273023	153288816	12	7	3	7.33333
375973	chr2	152951975	152959709	AC079790.2	chr2	153352202	153361184	7	9	3	6.33333
685033	chr7	82975946	82984868	AC079799.2	chr7	82992280	82997004	97	84	24	68.3333
345866	chr2	48130849	48134742	AC079807.2	chr2	48127343	48129564	1273	367	157	599
345866	chr2	48130849	48134742	AC079807.2	chr2	48328329	48332549	272	183	62	172.333
345866	chr2	48130849	48134742	AC079807.2	chr2	48552842	48565118	25	32	11	22.6667
345866	chr2	48130849	48134742	AC079807.2	chr2	48649292	48662848	81	66	9	52
397901	chr2	222383486	222389522	AC079834.1	chr2	221549556	221558794	25	22	6	17.6667
397901	chr2	222383486	222389522	AC079834.1	chr2	222377224	222378709	187	135	60	127.333
256471	chr15	94623753	94628327	AC080032.1	chr15	93616817	93620832	15	11	9	11.6667
256471	chr15	94623753	94628327	AC080032.1	chr15	94630701	94636030	471	708	243	474
256471	chr15	94623753	94628327	AC080032.1	chr15	94872232	94876601	20	20	13	17.6667
295641	chr17	70708801	70720496	AC080037.1	chr17	70707427	70721412	322	244	84	216.667
295641	chr17	70708801	70720496	AC080037.1	chr17	71169975	71181021	16	25	11	17.3333
391521	chr2	201449367	201453446	AC080164.1	chr2	200834555	200849162	27	16	10	17.6667
391521	chr2	201449367	201453446	AC080164.1	chr2	201453805	201455558	882	660	212	584.667
166559	chr12	82730993	82739612	AC083811.1	chr12	82740038	82744944	50	21	45	38.6667
522659	chr4	89410331	89420622	AC083829.1	chr4	88980453	88995824	36	36	12	28
522659	chr4	89410331	89420622	AC083829.1	chr4	89155453	89159039	99	75	16	63.3333
522659	chr4	89410331	89420622	AC083829.1	chr4	89405633	89420884	1333	457	358	716
522659	chr4	89410331	89420622	AC083829.1	chr4	89975780	89985920	14	9	13	12
671366	chr7	33048075	33057448	AC083863.7	chr7	33058466	33059299	264	163	101	176
672338	chr7	36118284	36120955	AC083864.4	chr7	36128234	36130242	123	113	80	105.333
700071	chr7	132945812	132952366	AC083875.1	chr7	132401138	132404522	10	10	7	9
700071	chr7	132945812	132952366	AC083875.1	chr7	132957355	132964693	373	261	67	233.667
701905	chr7	139065368	139075747	AC083883.1	chr7	139077083	139079740	650	401	99	383.333
393663	chr2	208842013	208843327	AC083900.1	chr2	208625528	208628602	55	46	49	50
393663	chr2	208842013	208843327	AC083900.1	chr2	208840304	208841104	780	269	165	404.667
726383	chr8	67024487	67035306	AC084082.3	chr8	67016525	67017807	206	97	74	125.667
726383	chr8	67024487	67035306	AC084082.3	chr8	67329084	67332183	12	29	5	15.3333
466658	chr3	101393991	101404832	AC084198.1	chr3	101382774	101390264	171	432	121	241.333
466658	chr3	101393991	101404832	AC084198.1	chr3	101744685	101759256	11	5	5	7
715698	chr8	29122859	29136730	AC084262.1	chr8	29116227	29119371	71	50	27	49.3333
689166	chr7	95932648	95940705	AC084368.1	chr7	95928160	95944635	491	511	155	385.667
689166	chr7	95932648	95940705	AC084368.1	chr7	96149765	96162882	22	18	4	14.6667
689166	chr7	95932648	95940705	AC084368.1	chr7	96323440	96324861	39	18	8	21.6667
689166	chr7	95932648	95940705	AC084368.1	chr7	96453267	96470388	5	5	3	4.33333
285412	chr17	31202849	31210495	AC084809.2	chr17	30791129	30801813	5	8	8	7
285412	chr17	31202849	31210495	AC084809.2	chr17	31200163	31202799	671	248	143	354
704040	chr7	146593218	146593816	AC084872.1	chr7	146595122	146601239	458	349	93	300
243303	chr15	47534156	47536596	AC084882.1	chr15	47529097	47540429	547	546	202	431.667
243303	chr15	47534156	47536596	AC084882.1	chr15	47817563	47836201	15	15	5	11.6667
243303	chr15	47534156	47536596	AC084882.1	chr15	48513721	48521534	6	13	5	8
672493	chr7	36680627	36688729	AC087069.1	chr7	37225132	37236225	30	17	8	18.3333
147537	chr12	20125723	20126936	AC087237.1	chr12	20120707	20131467	484	393	129	335.333
243225	chr15	47245893	47254578	AC087433.1	chr15	47255982	47256808	56	37	19	37.3333
280628	chr17	9359412	9365360	AC087501.1	chr17	9369643	9378701	42	32	21	31.6667
253705	chr15	84280779	84287446	AC087738.1	chr15	84277125	84277590	422	353	114	296.333
239229	chr15	33484018	33489091	AC090098.1	chr15	33149206	33169032	14	14	5	11
239229	chr15	33484018	33489091	AC090098.1	chr15	33491032	33492138	1380	1070	372	940.667
239229	chr15	33484018	33489091	AC090098.1	chr15	34006246	34022429	18	23	22	21
715125	chr8	27005062	27005677	AC090150.1	chr8	27000364	27007455	897	552	218	555.667
721834	chr8	52724434	52732554	AC090186.1	chr8	52719419	52723562	137	79	59	91.6667
721834	chr8	52724434	52732554	AC090186.1	chr8	52910515	52916654	7	9	8	8
303837	chr18	24166518	24173112	AC090206.1	chr18	24173212	24174275	260	176	120	185.333
303837	chr18	24166518	24173112	AC090206.1	chr18	25166128	25184709	3	4	4	3.66667
313771	chr18	55680797	55693307	AC090324.1	chr18	55337255	55338784	16	14	5	11.6667
313771	chr18	55680797	55693307	AC090324.1	chr18	55675934	55679750	437	407	173	339
745368	chr8	127151267	127154067	AC090573.1	chr8	127154523	127159190	101	60	39	66.6667
285236	chr17	30470057	30470999	AC090616.2	chr17	29634428	29640069	12	12	3	9
279109	chr17	2114048	2121936	AC090617.1	chr17	2107095	2107556	316	186	67	189.667
288929	chr17	46371490	46372886	AC090627.1	chr17	46362614	46367918	617	350	119	362
288929	chr17	46371490	46372886	AC090627.1	chr17	46668810	46680602	50	34	26	36.6667
441768	chr3	17175390	17191844	AC090644.1	chr3	16643133	16653460	31	15	13	19.6667
312165	chr18	50460944	50467526	AC090660.1	chr18	50457758	50476442	241	169	99	169.667
312537	chr18	51611202	51614655	AC090666.1	chr18	51615375	51620737	12	15	10	12.3333
258212	chr15	100287393	100293370	AC090825.2	chr15	100051814	100069578	6	6	9	7
258212	chr15	100287393	100293370	AC090825.2	chr15	100293926	100295205	127	108	98	111
258212	chr15	100287393	100293370	AC090825.2	chr15	100453164	100460398	10	11	9	10
440001	chr3	10522297	10523952	AC090841.1	chr3	10507859	10520144	431	312	118	287
441041	chr3	14689831	14693040	AC090952.5	chr3	14680504	14695234	708	631	210	516.333
441041	chr3	14689831	14693040	AC090952.5	chr3	14964906	14974450	73	52	38	54.3333
441154	chr3	15160779	15177920	AC090954.1	chr3	14964906	14974450	11	12	13	12
441154	chr3	15160779	15177920	AC090954.1	chr3	15449848	15462721	13	9	5	9
441077	chr3	14807934	14812919	AC090957.2	chr3	14798574	14807854	119	47	92	86
727486	chr8	70598964	70614892	AC091047.1	chr8	70592087	70597204	296	260	79	211.667
727486	chr8	70598964	70614892	AC091047.1	chr8	70987517	71000557	35	40	7	27.3333
727486	chr8	70598964	70614892	AC091047.1	chr8	71586846	71587682	6	9	3	6
256259	chr15	93959264	93963637	AC091078.1	chr15	93971342	93972806	133	115	72	106.667
734812	chr8	93647524	93656142	AC091096.1	chr8	93096965	93108847	5	6	6	5.66667
734812	chr8	93647524	93656142	AC091096.1	chr8	93660603	93667179	162	156	67	128.333
289089	chr17	47005121	47031529	AC091133.1	chr17	46992531	46996817	186	154	66	135.333
279604	chr17	4569753	4594037	AC091153.4	chr17	4561839	4562636	126	98	55	93
284937	chr17	29283181	29285996	AC091177.1	chr17	29280475	29281754	110	41	67	72.6667
102620	chr11	1521441	1540827	AC091196.1	chr11	1232999	1246648	57	53	19	43
102620	chr11	1521441	1540827	AC091196.1	chr11	1514200	1515740	273	244	184	233.667
304816	chr18	27057839	27064484	AC091321.1	chr18	27050677	27066715	450	273	81	268
567064	chr5	38814977	38822802	AC091435.2	chr5	38260833	38270644	17	3	4	8
567064	chr5	38814977	38822802	AC091435.2	chr5	38808907	38809379	91	60	41	64
88460	chr10	86622918	86627896	AC091487.1	chr10	86617910	86622222	33	14	10	19
711701	chr8	15379224	15379628	AC091559.1	chr8	15375431	15382917	921	557	347	608.333
711701	chr8	15379224	15379628	AC091559.1	chr8	16615442	16633449	17	11	5	11
316449	chr18	64320625	64323102	AC091643.1	chr18	64310174	64320400	361	161	55	192.333
666794	chr7	18336829	18339704	AC091697.1	chr7	17733269	17739742	22	11	12	15
666794	chr7	18336829	18339704	AC091697.1	chr7	18108273	18111008	77	41	16	44.6667
666794	chr7	18336829	18339704	AC091697.1	chr7	18332789	18346386	533	511	130	391.333
669124	chr7	25608722	25612226	AC091705.1	chr7	25291865	25295285	66	57	16	46.3333
669124	chr7	25608722	25612226	AC091705.1	chr7	25433118	25434134	91	71	23	61.6667
669124	chr7	25608722	25612226	AC091705.1	chr7	25614177	25614431	526	436	267	409.667
669124	chr7	25608722	25612226	AC091705.1	chr7	25878663	25884890	26	32	8	22
661967	chr7	1119003	1133678	AC091729.8	chr7	1139130	1144555	149	40	47	78.6667
661984	chr7	1197010	1200280	AC091729.9	chr7	1193385	1194266	340	213	195	249.333
700809	chr7	135479401	135491267	AC091736.1	chr7	135495387	135503002	312	286	119	239
700809	chr7	135479401	135491267	AC091736.1	chr7	135693962	135696048	321	273	110	234.667
700809	chr7	135479401	135491267	AC091736.1	chr7	136074805	136084058	16	16	13	15
700809	chr7	135479401	135491267	AC091736.1	chr7	136364819	136378349	15	22	4	13.6667
571745	chr5	54478208	54482382	AC091977.1	chr5	54473684	54474826	315	199	116	210
53317	chr1	211373677	211385428	AC092017.1	chr1	211385739	211391727	299	229	64	197.333
689222	chr7	96132429	96133386	AC092031.1	chr7	96133645	96141301	873	981	222	692
689222	chr7	96132429	96133386	AC092031.1	chr7	96632605	96649925	29	25	12	22
443863	chr3	23438751	23441692	AC092038.1	chr3	23433214	23444443	612	378	149	379.667
443863	chr3	23438751	23441692	AC092038.1	chr3	23859320	23875687	20	20	12	17.3333
449824	chr3	42466644	42470502	AC092047.1	chr3	42296209	42305565	95	107	55	85.6667
449824	chr3	42466644	42470502	AC092047.1	chr3	42475359	42481170	743	601	180	508
449822	chr3	42460470	42464729	AC092048.1	chr3	42300919	42306486	71	77	35	61
449822	chr3	42460470	42464729	AC092048.1	chr3	42470503	42475358	354	296	153	267.667
449822	chr3	42460470	42464729	AC092048.1	chr3	42937314	42956498	7	9	8	8
330969	chr19	53784306	53793064	AC092070.1	chr19	53796416	53798714	220	231	79	176.667
350521	chr2	62886472	62890963	AC092155.4	chr2	62779776	62785604	49	50	27	42
350521	chr2	62886472	62890963	AC092155.4	chr2	62894014	62903754	267	308	187	254
332179	chr2	686044	694682	AC092159.3	chr2	261892	281360	14	14	13	13.6667
332179	chr2	686044	694682	AC092159.3	chr2	1553448	1555907	25	19	3	15.6667
6386	chr1	30113931	30119220	AC092265.1	chr1	30123753	30133110	238	96	147	160.333
6386	chr1	30113931	30119220	AC092265.1	chr1	30768413	30779060	5	6	6	5.66667
324796	chr19	24176984	24192248	AC092279.1	chr19	24174560	24175164	380	288	182	283.333
274347	chr16	72612488	72616572	AC092289.1	chr16	72606334	72611433	419	272	182	291
327837	chr19	37017641	37022231	AC092295.4	chr19	37010740	37013559	366	226	82	224.667
327838	chr19	37022232	37029043	AC092295.5	chr19	37013560	37017640	64	39	16	39.6667
327847	chr19	37061433	37072661	AC092295.7	chr19	37058733	37059041	48	23	30	33.6667
278013	chr16	86376427	86380148	AC092327.1	chr16	86104129	86107264	27	21	14	20.6667
278013	chr16	86376427	86380148	AC092327.1	chr16	86370981	86376343	261	214	211	228.667
278013	chr16	86376427	86380148	AC092327.1	chr16	86549984	86552124	132	92	62	95.3333
278013	chr16	86376427	86380148	AC092327.1	chr16	87118912	87126575	12	9	3	8
324554	chr19	23437350	23451255	AC092329.1	chr19	23417572	23428904	125	98	40	87.6667
510353	chr4	47559161	47563599	AC092597.3	chr4	47554004	47557671	260	184	77	173.667
548411	chr4	168824018	168830177	AC092621.1	chr4	168830913	168836363	167	136	36	113
367049	chr2	124434697	124450442	AC092646.1	chr2	124432789	124434289	291	177	63	177
373134	chr2	144410041	144420884	AC092652.1	chr2	144406718	144409908	32	17	21	23.3333
373134	chr2	144410041	144420884	AC092652.1	chr2	144705814	144722334	3	4	6	4.33333
360127	chr2	100718771	100723132	AC092667.2	chr2	100181189	100192037	16	7	7	10
360127	chr2	100718771	100723132	AC092667.2	chr2	100728261	100738044	146	130	76	117.333
351685	chr2	66666185	66670392	AC092669.4	chr2	65858785	65878154	14	16	8	12.6667
351685	chr2	66666185	66670392	AC092669.4	chr2	66664702	66676659	701	384	177	420.667
351685	chr2	66666185	66670392	AC092669.4	chr2	66789853	66806976	96	54	20	56.6667
351685	chr2	66666185	66670392	AC092669.4	chr2	67626070	67631361	14	16	5	11.6667
351685	chr2	66666185	66670392	AC092669.4	chr2	68062614	68067567	14	24	10	16
359653	chr2	98968858	98974970	AC092675.3	chr2	98413372	98423694	20	32	16	22.6667
359653	chr2	98968858	98974970	AC092675.3	chr2	98967280	98967579	404	239	180	274.333
334933	chr2	10729203	10730544	AC092687.5	chr2	10736127	10736754	160	141	71	124
275798	chr16	77743478	77758893	AC092724.1	chr16	77739225	77743462	444	464	108	338.667
247016	chr15	59507189	59510619	AC092756.1	chr15	59512357	59517431	676	204	329	403
246994	chr15	59443065	59446355	AC092757.1	chr15	59450667	59458097	461	421	201	361
246994	chr15	59443065	59446355	AC092757.1	chr15	59783525	59799351	40	39	19	32.6667
56736	chr1	222186067	222186868	AC092765.1	chr1	221918305	221934250	26	50	5	27
56736	chr1	222186067	222186868	AC092765.1	chr1	222190732	222201855	482	141	130	251
370824	chr2	137402452	137404553	AC092786.1	chr2	137406493	137406979	666	534	249	483
370824	chr2	137402452	137404553	AC092786.1	chr2	138423923	138438109	8	10	8	8.66667
370824	chr2	137402452	137404553	AC092786.1	chr2	138573522	138585920	10	15	10	11.6667
57694	chr1	225596388	225605175	AC092811.1	chr1	225589944	225592332	751	545	172	489.333
57694	chr1	225596388	225605175	AC092811.1	chr1	225951977	225956693	18	14	20	17.3333
57694	chr1	225596388	225605175	AC092811.1	chr1	226161582	226181019	25	24	9	19.3333
25848	chr1	96351954	96358269	AC092812.1	chr1	96361735	96364721	74	39	33	48.6667
347983	chr2	54765447	54769186	AC092839.3	chr2	53989832	54007994	5	3	4	4
347983	chr2	54765447	54769186	AC092839.3	chr2	54771379	54774753	468	525	242	411.667
347983	chr2	54765447	54769186	AC092839.3	chr2	55062618	55075649	5	12	7	8
347986	chr2	54772738	54774404	AC092839.4	chr2	54331577	54339450	5	5	3	4.33333
347986	chr2	54772738	54774404	AC092839.4	chr2	54769187	54778585	605	377	75	352.333
379159	chr2	162774454	162776434	AC092841.1	chr2	162286299	162297167	26	16	4	15.3333
379159	chr2	162774454	162776434	AC092841.1	chr2	162766811	162783327	303	217	98	206
379159	chr2	162774454	162776434	AC092841.1	chr2	162974675	162994641	33	36	7	25.3333
503268	chr4	24419783	24424102	AC092846.1	chr4	23137552	23146555	37	89	21	49
503268	chr4	24419783	24424102	AC092846.1	chr4	23349911	23357216	14	13	9	12
503268	chr4	24419783	24424102	AC092846.1	chr4	24412684	24427540	1063	724	205	664
503268	chr4	24419783	24424102	AC092846.1	chr4	25007476	25017631	19	21	5	15
469150	chr3	109211192	109216733	AC092905.1	chr3	109194518	109206627	186	169	61	138.667
480834	chr3	147623803	147637757	AC092925.1	chr3	147065935	147083538	6	9	6	7
480834	chr3	147623803	147637757	AC092925.1	chr3	147639243	147644351	418	195	190	267.667
480894	chr3	147796068	147801751	AC092958.1	chr3	147805002	147805228	516	306	273	365
480894	chr3	147796068	147801751	AC092958.1	chr3	148160190	148166977	19	20	6	15
488729	chr3	172028675	172038648	AC092964.1	chr3	172014327	172019217	368	371	162	300.333
495117	chr3	192875877	192886568	AC092966.1	chr3	192502664	192515109	13	17	7	12.3333
475374	chr3	130087764	130088332	AC093004.1	chr3	130086451	130089409	933	656	416	668.333
178711	chr12	125737810	125747583	AC093028.1	chr12	125748955	125750459	235	235	148	206
348032	chr2	54888688	54892284	AC093110.3	chr2	54173710	54186846	8	12	6	8.66667
348032	chr2	54888688	54892284	AC093110.3	chr2	54333570	54339450	55	45	21	40.3333
348032	chr2	54888688	54892284	AC093110.3	chr2	54752775	54759035	266	182	52	166.667
348032	chr2	54888688	54892284	AC093110.3	chr2	54883301	54888026	1199	816	343	786
348032	chr2	54888688	54892284	AC093110.3	chr2	55061465	55073211	65	87	27	59.6667
357294	chr2	85520234	85532793	AC093162.1	chr2	85286554	85300451	17	26	14	19
357294	chr2	85520234	85532793	AC093162.1	chr2	85541865	85545274	67	40	38	48.3333
400582	chr2	230989680	230999008	AC093171.1	chr2	231000602	231009701	343	268	111	240.667
400582	chr2	230989680	230999008	AC093171.1	chr2	231658933	231665728	15	14	4	11
593250	chr5	122111880	122113314	AC093267.1	chr5	121857128	121862258	39	22	12	24.3333
593250	chr5	122111880	122113314	AC093267.1	chr5	122103672	122114734	478	1044	327	616.333
593250	chr5	122111880	122113314	AC093267.1	chr5	122910092	122926178	10	12	7	9.66667
606980	chr5	167292237	167300942	AC093304.1	chr5	167288438	167306177	330	120	121	190.333
584199	chr5	93913103	93917429	AC093311.1	chr5	93908820	93912720	413	230	96	246.333
370607	chr2	136741463	136749415	AC093391.2	chr2	136735943	136754653	52	61	39	50.6667
370607	chr2	136741463	136749415	AC093391.2	chr2	136876756	136879429	11	7	12	10
370607	chr2	136741463	136749415	AC093391.2	chr2	137134337	137141367	21	26	17	21.3333
440914	chr3	14185108	14187206	AC093495.4	chr3	13932856	13941999	22	16	8	15.3333
440914	chr3	14185108	14187206	AC093495.4	chr3	14184209	14198180	265	163	233	220.333
582923	chr5	89769063	89774911	AC093510.2	chr5	89303915	89319506	8	5	3	5.33333
582923	chr5	89769063	89774911	AC093510.2	chr5	89779895	89787223	386	219	90	231.667
260411	chr16	7939645	7955930	AC093515.1	chr16	7956364	7956725	93	76	60	76.3333
24976	chr1	93446633	93461668	AC093577.1	chr1	93464463	93465960	613	453	234	433.333
25013	chr1	93566378	93572383	AC093577.4	chr1	93552569	93558198	105	119	65	96.3333
25013	chr1	93566378	93572383	AC093577.4	chr1	94336450	94351248	3	3	2	2.66667
403222	chr2	241949478	241961496	AC093585.6	chr2	241434137	241443821	8	12	10	10
403222	chr2	241949478	241961496	AC093585.6	chr2	241967796	241981793	407	346	166	306.333
440785	chr3	13687304	13698891	AC093611.1	chr3	13700088	13708148	101	27	80	69.3333
440785	chr3	13687304	13698891	AC093611.1	chr3	13918274	13928110	32	15	17	21.3333
440785	chr3	13687304	13698891	AC093611.1	chr3	14153425	14159507	3	6	6	5
662823	chr7	5441213	5461830	AC093620.5	chr7	5470760	5471307	99	59	62	73.3333
527860	chr4	105411790	105414767	AC093628.1	chr4	105409627	105419716	601	456	304	453.667
702951	chr7	143072636	143081630	AC093673.5	chr7	142681463	142698830	7	7	4	6
528518	chr4	107332845	107343411	AC093680.1	chr4	107348141	107351759	133	101	42	92
340046	chr2	28533312	28534163	AC093690.1	chr2	28530219	28531234	355	280	160	265
681097	chr7	68525974	68529366	AC093693.1	chr7	68522728	68523306	517	412	166	365
545554	chr4	159919519	159928740	AC093700.1	chr4	159932015	159932250	170	147	112	143
706203	chr7	154718902	154726320	AC093726.6	chr7	154713714	154717565	431	290	157	292.667
706203	chr7	154718902	154726320	AC093726.6	chr7	154981659	154986671	25	18	12	18.3333
706203	chr7	154718902	154726320	AC093726.6	chr7	155328020	155328221	15	21	16	17.3333
345607	chr2	47263467	47268906	AC093732.1	chr2	47269140	47281046	185	162	100	149
345607	chr2	47263467	47268906	AC093732.1	chr2	47391905	47399730	57	41	20	39.3333
345607	chr2	47263467	47268906	AC093732.1	chr2	47509809	47524238	19	27	9	18.3333
539110	chr4	139725605	139740674	AC093766.1	chr4	138949261	138964697	14	7	5	8.66667
539110	chr4	139725605	139740674	AC093766.1	chr4	139723722	139724501	270	217	103	196.667
689770	chr7	98027578	98031224	AC093799.1	chr7	98372692	98373820	19	15	8	14
545072	chr4	158506469	158509536	AC093817.1	chr4	158510854	158513586	58	34	22	38
550952	chr4	176663921	176671121	AC093819.1	chr4	176672049	176683250	219	163	47	143
395313	chr2	213625136	213630979	AC093865.1	chr2	213635245	213645878	198	291	137	208.667
395313	chr2	213625136	213630979	AC093865.1	chr2	214021766	214027168	52	72	12	45.3333
519280	chr4	79107742	79110300	AC093897.1	chr4	78419666	78421231	5	5	7	5.66667
519280	chr4	79107742	79110300	AC093897.1	chr4	79101967	79106651	517	398	172	362.333
19847	chr1	77854739	77859422	AC095030.1	chr1	77861160	77863244	890	599	236	575
513708	chr4	61524272	61536848	AC095061.1	chr4	61537368	61546140	247	152	53	150.667
373072	chr2	144232410	144239878	AC096558.1	chr2	144226688	144230090	325	221	110	218.667
373072	chr2	144232410	144239878	AC096558.1	chr2	144688952	144705813	10	8	3	7
377575	chr2	157786571	157789208	AC096589.1	chr2	157780267	157790160	390	358	99	282.333
50334	chr1	200111191	200115077	AC096633.1	chr1	199649122	199657924	26	23	13	20.6667
50334	chr1	200111191	200115077	AC096633.1	chr1	200124157	200125151	157	121	49	109
50334	chr1	200111191	200115077	AC096633.1	chr1	200458109	200469267	44	19	13	25.3333
55934	chr1	219561338	219575438	AC096642.1	chr1	218498973	218515491	30	32	9	23.6667
55934	chr1	219561338	219575438	AC096642.1	chr1	219219245	219231002	16	17	6	13
55934	chr1	219561338	219575438	AC096642.1	chr1	219559014	219560903	333	241	83	219
55934	chr1	219561338	219575438	AC096642.1	chr1	219836814	219837929	48	68	22	46
56017	chr1	219834718	219836813	AC096643.1	chr1	218495813	218502355	54	40	9	34.3333
56017	chr1	219834718	219836813	AC096643.1	chr1	219380808	219390436	70	39	29	46
56017	chr1	219834718	219836813	AC096643.1	chr1	219575439	219582279	68	65	17	50
56017	chr1	219834718	219836813	AC096643.1	chr1	219837930	219841565	712	589	195	498.667
56234	chr1	220606232	220609971	AC096644.1	chr1	220616126	220622149	220	229	69	172.667
51294	chr1	203964633	203970158	AC096645.1	chr1	203950830	203961979	400	313	174	295.667
383373	chr2	176193018	176199329	AC096649.1	chr2	176204407	176204912	559	412	186	385.667
383373	chr2	176193018	176199329	AC096649.1	chr2	176939118	176958946	47	40	31	39.3333
350835	chr2	63919848	63925484	AC096664.1	chr2	62686687	62701029	3	7	3	4.33333
350835	chr2	63919848	63925484	AC096664.1	chr2	63014802	63026228	3	8	4	5
350835	chr2	63919848	63925484	AC096664.1	chr2	63914323	63916529	158	244	93	165
350835	chr2	63919848	63925484	AC096664.1	chr2	64091182	64100306	141	139	42	107.333
350835	chr2	63919848	63925484	AC096664.1	chr2	64356180	64370088	9	6	3	6
386396	chr2	185464323	185473477	AC096667.1	chr2	185474929	185477497	428	609	157	398
363330	chr2	111872736	111883621	AC096670.3	chr2	111572939	111583733	96	45	50	63.6667
363330	chr2	111872736	111883621	AC096670.3	chr2	111871928	111886600	423	401	260	361.333
363330	chr2	111872736	111883621	AC096670.3	chr2	112461027	112464933	37	27	14	26
499451	chr4	12795948	12803998	AC096750.1	chr4	12804456	12807741	256	186	30	157.333
457094	chr3	68678183	68687054	AC096922.1	chr3	68690230	68697551	348	256	46	216.667
457801	chr3	70926100	70934093	AC096971.1	chr3	70617022	70628717	24	20	7	17
457801	chr3	70926100	70934093	AC096971.1	chr3	70925240	70935831	364	289	166	273
457801	chr3	70926100	70934093	AC096971.1	chr3	71641494	71661149	5	6	5	5.33333
452389	chr3	53241813	53245478	AC097015.1	chr3	52922727	52930641	15	8	6	9.66667
445710	chr3	29049420	29053742	AC097361.1	chr3	29041636	29059116	314	111	66	163.667
541405	chr4	147043195	147043441	AC097372.1	chr4	146847955	146862851	19	33	17	23
541405	chr4	147043195	147043441	AC097372.1	chr4	147029877	147045186	1004	663	186	617.667
541405	chr4	147043195	147043441	AC097372.1	chr4	147833374	147843629	10	16	6	10.6667
504236	chr4	27620878	27639303	AC097380.1	chr4	27618127	27618440	120	81	98	99.6667
498125	chr4	7939815	7944483	AC097381.1	chr4	7947463	7947763	169	86	163	139.333
543187	chr4	152482037	152487206	AC097455.1	chr4	152472315	152479783	469	397	104	323.333
398350	chr2	223777367	223787348	AC097461.4	chr2	223172552	223180739	11	9	4	8
398350	chr2	223777367	223787348	AC097461.4	chr2	223771134	223776282	662	481	149	430.667
544352	chr4	156273862	156277968	AC097467.2	chr4	155471796	155479424	30	15	9	18
544352	chr4	156273862	156277968	AC097467.2	chr4	155727768	155739358	62	21	17	33.3333
544352	chr4	156273862	156277968	AC097467.2	chr4	155902045	155906882	52	43	10	35
544352	chr4	156273862	156277968	AC097467.2	chr4	156266289	156284072	494	284	142	306.667
544352	chr4	156273862	156277968	AC097467.2	chr4	156724669	156736606	20	23	5	16
352440	chr2	69050828	69060264	AC097495.2	chr2	68695688	68702308	57	25	23	35
352440	chr2	69050828	69060264	AC097495.2	chr2	69061155	69061460	857	478	387	574
550110	chr4	174189057	174189493	AC097534.1	chr4	173941775	173943479	81	74	31	62
550110	chr4	174189057	174189493	AC097534.1	chr4	174181415	174186586	477	279	153	303
446774	chr3	32298463	32304453	AC097639.1	chr3	32307736	32314419	239	233	62	178
446774	chr3	32298463	32304453	AC097639.1	chr3	32697294	32710101	17	11	7	11.6667
388741	chr2	192705523	192718847	AC098617.2	chr2	192416521	192419954	41	40	14	31.6667
388741	chr2	192705523	192718847	AC098617.2	chr2	192721161	192726325	585	457	161	401
388741	chr2	192705523	192718847	AC098617.2	chr2	193022152	193024388	91	92	57	80
445857	chr3	29407562	29412112	AC098650.1	chr3	29413584	29421600	234	135	129	166
507595	chr4	38237905	38244524	AC098680.1	chr4	38252115	38259473	240	196	67	167.667
24534	chr1	91851952	91860609	AC098691.1	chr1	91845151	91849670	393	263	95	250.333
396529	chr2	217344416	217355616	AC098820.4	chr2	217342467	217343802	24	28	11	21
314281	chr18	57412470	57418000	AC098847.1	chr18	57418401	57419008	171	81	53	101.667
508169	chr4	40462512	40474955	AC098869.1	chr4	40477753	40478016	344	229	199	257.333
388725	chr2	192653057	192660372	AC098872.3	chr2	192416521	192426285	20	13	4	12.3333
388725	chr2	192653057	192660372	AC098872.3	chr2	192663020	192666109	148	89	49	95.3333
388725	chr2	192653057	192660372	AC098872.3	chr2	193024389	193041487	25	18	10	17.6667
543547	chr4	153818551	153824482	AC099339.1	chr4	153813657	153832017	677	423	139	413
543547	chr4	153818551	153824482	AC099339.1	chr4	154221794	154236843	20	13	4	12.3333
261248	chr16	11578222	11592606	AC099489.1	chr16	11563396	11569219	53	36	38	42.3333
277230	chr16	82868141	82877186	AC099506.1	chr16	82865930	82866322	253	205	150	202.667
445202	chr3	27397888	27406909	AC099535.1	chr3	27407980	27408625	348	257	126	243.667
450707	chr3	45632014	45645644	AC099539.1	chr3	45076374	45078843	14	10	8	10.6667
450707	chr3	45632014	45645644	AC099539.1	chr3	45649911	45665906	161	169	139	156.333
446530	chr3	31435762	31437655	AC099540.1	chr3	30051847	30071674	8	5	2	5
446530	chr3	31435762	31437655	AC099540.1	chr3	30831032	30845787	16	13	5	11.3333
446530	chr3	31435762	31437655	AC099540.1	chr3	31428085	31434332	466	525	352	447.667
455442	chr3	63318853	63324204	AC099545.1	chr3	63799448	63799821	54	38	24	38.6667
455442	chr3	63318853	63324204	AC099545.1	chr3	64018722	64026837	18	20	10	16
706283	chr7	154986672	154991769	AC099552.4	chr7	154984226	154985167	139	85	93	105.667
63180	chr1	244744391	244757248	AC099757.1	chr1	244762038	244763461	899	734	198	610.333
63180	chr1	244744391	244757248	AC099757.1	chr1	245192339	245195873	40	38	23	33.6667
313531	chr18	54813047	54831932	AC100775.1	chr18	54812549	54812947	137	143	82	120.667
297078	chr17	77782841	77807007	AC100791.2	chr17	77772911	77773716	185	26	104	105
713153	chr8	19931874	19944876	AC100802.3	chr8	19826436	19831775	197	139	73	136.333
723044	chr8	56588559	56591225	AC100817.1	chr8	55694506	55713888	8	6	5	6.33333
723044	chr8	56588559	56591225	AC100817.1	chr8	56580974	56581710	345	330	143	272.667
723044	chr8	56588559	56591225	AC100817.1	chr8	57787645	57806624	3	4	2	3
291938	chr17	57066082	57069739	AC100832.1	chr17	56784272	56789379	29	35	9	24.3333
291938	chr17	57066082	57069739	AC100832.1	chr17	57062652	57082151	142	213	141	165.333
290175	chr17	51061277	51064056	AC102948.1	chr17	51053627	51070196	297	425	106	276
358796	chr2	95709112	95720490	AC103563.9	chr2	95705524	95707509	339	229	244	270.667
444689	chr3	25911297	25919877	AC103588.1	chr3	24767915	24778315	3	5	4	4
444689	chr3	25911297	25919877	AC103588.1	chr3	25679060	25687664	24	32	19	25
720594	chr8	48792847	48810864	AC103686.1	chr8	48143920	48161230	8	12	6	8.66667
720594	chr8	48792847	48810864	AC103686.1	chr8	48788162	48791900	823	580	137	513.333
103314	chr11	4729406	4735188	AC103710.1	chr11	4723706	4725263	502	412	133	349
106788	chr11	16144657	16146562	AC103794.1	chr11	16139751	16140450	727	501	184	470.667
108823	chr11	22634465	22649497	AC103801.2	chr11	22352479	22362529	6	4	2	4
108823	chr11	22634465	22649497	AC103801.2	chr11	22651345	22655001	102	75	26	67.6667
296005	chr17	72302411	72320215	AC103809.1	chr17	72301757	72302271	229	149	81	153
732162	chr8	85207952	85213374	AC103816.1	chr8	85203333	85206742	185	132	60	125.667
116607	chr11	48028349	48056146	AC103828.1	chr11	48058970	48068998	256	150	66	157.333
742170	chr8	117142014	117149562	AC103863.1	chr8	116687296	116702425	24	23	7	18
742170	chr8	117142014	117149562	AC103863.1	chr8	117135908	117151753	715	516	375	535.333
742170	chr8	117142014	117149562	AC103863.1	chr8	117709971	117727095	7	11	3	7
256406	chr15	94438428	94443402	AC103996.1	chr15	93626556	93627612	8	5	6	6.33333
256406	chr15	94438428	94443402	AC103996.1	chr15	94434858	94436339	625	355	119	366.333
728184	chr8	72743513	72744958	AC104012.1	chr8	71576914	71587682	13	10	5	9.33333
728184	chr8	72743513	72744958	AC104012.1	chr8	71681423	71685692	11	7	9	9
728184	chr8	72743513	72744958	AC104012.1	chr8	71959351	71974872	9	8	3	6.66667
728184	chr8	72743513	72744958	AC104012.1	chr8	72747516	72750442	592	363	158	371
728184	chr8	72743513	72744958	AC104012.1	chr8	73063942	73072572	164	42	15	73.6667
282710	chr17	16890665	16896704	AC104024.2	chr17	16877118	16884108	51	47	24	40.6667
385186	chr2	181844443	181846639	AC104076.3	chr2	180858725	180869848	20	27	8	18.3333
385186	chr2	181844443	181846639	AC104076.3	chr2	180991774	181005429	49	80	8	45.6667
385186	chr2	181844443	181846639	AC104076.3	chr2	181396979	181404563	35	111	38	61.3333
385186	chr2	181844443	181846639	AC104076.3	chr2	181849146	181857861	384	371	140	298.333
573565	chr5	60211231	60220325	AC104113.3	chr5	59975982	59984047	57	47	7	37
573565	chr5	60211231	60220325	AC104113.3	chr5	60220425	60221072	401	287	127	271.667
358108	chr2	88836095	88845138	AC104134.2	chr2	88850388	88856616	375	212	59	215.333
22313	chr1	85258626	85259072	AC104169.1	chr1	84591752	84596356	13	14	9	12
22313	chr1	85258626	85259072	AC104169.1	chr1	85261612	85265695	661	364	268	431
744023	chr8	122648732	122658380	AC104233.1	chr8	122644083	122644282	263	201	165	209.667
255894	chr15	92514852	92521622	AC104236.1	chr15	92523740	92528077	340	268	85	231
450978	chr3	46615946	46618741	AC104304.1	chr3	45831040	45850039	3	8	4	5
734655	chr8	93179646	93180246	AC104339.1	chr8	93185666	93188052	209	174	87	156.667
734655	chr8	93179646	93180246	AC104339.1	chr8	93797827	93814142	9	14	5	9.33333
369541	chr2	133277794	133288326	AC104405.1	chr2	133275458	133277337	354	325	127	268.667
369541	chr2	133277794	133288326	AC104405.1	chr2	133919296	133924237	18	9	8	11.6667
750005	chr8	143021958	143030727	AC104417.1	chr8	143015715	143033360	444	403	121	322.667
450014	chr3	43250282	43252715	AC104434.1	chr3	42991522	43005060	59	28	13	33.3333
450014	chr3	43250282	43252715	AC104434.1	chr3	43245388	43246365	738	546	221	501.667
450014	chr3	43250282	43252715	AC104434.1	chr3	43545012	43549719	61	46	41	49.3333
27352	chr1	100838675	100845342	AC104457.1	chr1	100845608	100847052	85	44	35	54.6667
483367	chr3	155459208	155463682	AC104472.1	chr3	155083350	155090215	25	24	10	19.6667
483367	chr3	155459208	155463682	AC104472.1	chr3	155453754	155470079	471	586	120	392.333
336695	chr2	16702524	16708458	AC104623.2	chr2	15773443	15786141	56	44	13	37.6667
336695	chr2	16702524	16708458	AC104623.2	chr2	16070266	16072330	33	26	7	22
336695	chr2	16702524	16708458	AC104623.2	chr2	16700363	16701990	610	495	179	428
336695	chr2	16702524	16708458	AC104623.2	chr2	16932812	16942592	63	47	46	52
361637	chr2	105717464	105731002	AC104655.2	chr2	105732500	105739459	323	222	270	271.667
361637	chr2	105717464	105731002	AC104655.2	chr2	105844105	105850819	162	91	81	111.333
402498	chr2	238498712	238509861	AC104667.3	chr2	238492805	238512274	286	185	69	180
339308	chr2	25639818	25653459	AC104699.1	chr2	25633899	25637987	337	247	127	237
348062	chr2	54971580	54977395	AC104781.1	chr2	54978516	54978670	765	532	477	591.333
334824	chr2	10223532	10224297	AC104794.4	chr2	10235582	10242963	240	178	89	169
334824	chr2	10223532	10224297	AC104794.4	chr2	10575318	10593268	62	41	28	43.6667
334824	chr2	10223532	10224297	AC104794.4	chr2	10802404	10821253	35	28	6	23
398750	chr2	225102992	225109926	AC104802.1	chr2	225098795	225099831	362	223	105	230
403204	chr2	241841318	241867093	AC104809.3	chr2	241868587	241870565	400	277	209	295.333
20214	chr1	79152520	79154652	AC104837.1	chr1	78607818	78612741	28	34	11	24.3333
20214	chr1	79152520	79154652	AC104837.1	chr1	79147051	79159356	319	376	85	260
116513	chr11	47598873	47600306	AC104942.1	chr11	47602284	47605995	293	157	137	195.667
357407	chr2	86038814	86043064	AC105053.3	chr2	86028953	86034087	204	222	117	181
357407	chr2	86038814	86043064	AC105053.3	chr2	86307338	86309564	110	107	59	92
313918	chr18	56133335	56134967	AC105105.1	chr18	55627489	55643793	13	11	6	10
313918	chr18	56133335	56134967	AC105105.1	chr18	56126002	56144132	506	326	190	340.667
248735	chr15	65667181	65670844	AC105129.1	chr15	65650002	65661148	409	284	166	286.333
304733	chr18	26776373	26778544	AC105245.1	chr18	26772775	26774159	59	37	22	39.3333
550092	chr4	174098090	174109628	AC105285.1	chr4	174094392	174095437	558	360	137	351.667
550092	chr4	174098090	174109628	AC105285.1	chr4	175195158	175202394	7	4	2	4.33333
545658	chr4	160214977	160218478	AC105316.1	chr4	160210017	160212922	563	466	197	408.667
374895	chr2	149637499	149652244	AC105402.4	chr2	149657894	149658134	247	240	179	222
374895	chr2	149637499	149652244	AC105402.4	chr2	150412521	150422490	10	14	3	9
401011	chr2	232861098	232882131	AC105461.1	chr2	232855342	232859104	508	329	138	325
402342	chr2	237963367	237973252	AC105760.3	chr2	237254007	237272999	80	29	60	56.3333
402342	chr2	237963367	237973252	AC105760.3	chr2	237420945	237425836	76	42	38	52
402342	chr2	237963367	237973252	AC105760.3	chr2	237962062	237962706	378	185	141	234.667
50055	chr1	199165329	199171424	AC105941.1	chr1	199158506	199173694	665	444	318	475.667
482217	chr3	151979492	151989579	AC106722.1	chr3	152161960	152163875	77	82	37	65.3333
577774	chr5	73565188	73569384	AC106732.1	chr5	73553902	73562976	638	446	204	429.333
273976	chr16	71361756	71371750	AC106736.1	chr16	71043339	71057075	15	31	16	20.6667
273976	chr16	71361756	71371750	AC106736.1	chr16	71377005	71377261	191	169	144	168
603662	chr5	156984006	156994058	AC106801.1	chr5	156981351	156981872	53	29	26	36
546200	chr4	161923883	161926537	AC106860.1	chr4	161926932	161931458	50	40	22	37.3333
340491	chr2	30111991	30114675	AC106870.1	chr2	30105861	30119514	382	317	179	292.667
340496	chr2	30121640	30123897	AC106870.2	chr2	30115696	30124864	500	395	229	374.667
695116	chr7	116604326	116608061	AC106873.4	chr7	116608815	116610594	935	731	266	644
695116	chr7	116604326	116608061	AC106873.4	chr7	116754961	116766874	133	96	37	88.6667
401269	chr2	233876686	233877947	AC106876.2	chr2	233882279	233885650	585	470	248	434.333
401269	chr2	233876686	233877947	AC106876.2	chr2	234150927	234163288	32	23	16	23.6667
179701	chr12	129149066	129161674	AC107020.1	chr12	129164450	129167142	204	200	116	173.333
179701	chr12	129149066	129161674	AC107020.1	chr12	130372794	130384558	11	18	7	12
480240	chr3	145779886	145782471	AC107021.1	chr3	145789724	145790768	350	324	107	260.333
480240	chr3	145779886	145782471	AC107021.1	chr3	145902032	145911413	157	123	28	102.667
480240	chr3	145779886	145782471	AC107021.1	chr3	146302488	146314706	64	62	24	50
480240	chr3	145779886	145782471	AC107021.1	chr3	146911618	146922835	8	8	2	6
510490	chr4	47974062	47978426	AC107068.1	chr4	47169729	47178787	6	3	2	3.66667
510490	chr4	47974062	47978426	AC107068.1	chr4	47962449	47971200	161	280	54	165
510490	chr4	47974062	47978426	AC107068.1	chr4	48080097	48085829	36	32	13	27
350298	chr2	62094729	62096825	AC107081.5	chr2	62092775	62107431	320	278	99	232.333
741272	chr8	114414939	114421691	AC107890.1	chr8	113812490	113822240	10	7	6	7.66667
287675	chr17	40543687	40554702	AC107993.1	chr17	40477331	40487053	122	80	54	85.3333
278766	chr17	262444	263865	AC108004.3	chr17	603865	612288	112	49	25	62
333573	chr2	5828892	5834630	AC108025.2	chr2	5733126	5739628	11	7	8	8.66667
333573	chr2	5828892	5834630	AC108025.2	chr2	5837686	5838580	145	111	78	111.333
251126	chr15	74180278	74184835	AC108137.1	chr15	74185767	74199346	314	231	122	222.333
512044	chr4	56135731	56139818	AC108209.1	chr4	56131564	56141015	331	197	128	218.667
544649	chr4	157215059	157219250	AC108211.1	chr4	156748163	156757887	16	13	5	11.3333
544649	chr4	157215059	157219250	AC108211.1	chr4	157223018	157227694	511	415	138	354.667
102890	chr11	3208601	3219519	AC108448.3	chr11	3226277	3235954	29	22	50	33.6667
332335	chr2	1345434	1350653	AC108462.1	chr2	1351836	1353661	277	250	138	221.667
363370	chr2	111993002	112000145	AC108463.1	chr2	111988556	112002961	408	64	61	177.667
462089	chr3	84339096	84348796	AC108696.1	chr3	84349649	84353537	236	267	109	204
464946	chr3	96151680	96157352	AC108697.1	chr3	95711684	95721288	4	4	2	3.33333
464946	chr3	96151680	96157352	AC108697.1	chr3	96146339	96148464	215	116	73	134.667
464867	chr3	95878375	95902979	AC108739.1	chr3	95903387	95908156	169	102	51	107.333
554364	chr4	187778610	187781422	AC108865.1	chr4	187772910	187784274	419	165	92	225.333
537959	chr4	136291196	136294250	AC108867.1	chr4	136284245	136294772	767	451	151	456.333
102897	chr11	3245576	3248332	AC109309.4	chr11	3250248	3260366	300	28	159	162.333
311655	chr18	48917605	48919292	AC109315.1	chr18	48923442	48925594	38	30	12	26.6667
287833	chr17	41369970	41383064	AC109326.1	chr17	41367709	41368355	214	148	116	159.333
533933	chr4	123925124	123929327	AC109357.1	chr4	123929820	123936134	52	38	24	38
573410	chr5	59724641	59730170	AC109486.1	chr5	59733050	59738706	835	583	194	537.333
580803	chr5	83267748	83271718	AC109496.1	chr5	83272168	83273291	348	243	73	221.333
445563	chr3	28614815	28621005	AC109586.1	chr3	28622471	28624455	617	439	167	407.667
828773	chrX	149654590	149661925	AC109994.1	chrX	149122677	149134828	22	15	14	17
828773	chrX	149654590	149661925	AC109994.1	chrX	149666109	149669459	147	143	70	120
297372	chr17	79371698	79373802	AC110285.1	chr17	79375301	79381224	305	93	142	180
511666	chr4	54965701	54970271	AC110298.1	chr4	54234009	54240672	13	6	3	7.33333
511666	chr4	54965701	54970271	AC110298.1	chr4	54785061	54794252	54	30	30	38
511666	chr4	54965701	54970271	AC110298.1	chr4	54952362	54960110	405	85	240	243.333
465380	chr3	97540233	97541685	AC110491.1	chr3	97537123	97537941	721	229	187	379
465380	chr3	97540233	97541685	AC110491.1	chr3	98048934	98066358	6	3	7	5.33333
465380	chr3	97540233	97541685	AC110491.1	chr3	98235938	98248677	12	4	12	9.33333
512245	chr4	56793047	56801123	AC110611.1	chr4	56787431	56792886	308	254	59	207
364136	chr2	114746134	114749226	AC110769.1	chr2	114744367	114746119	1385	935	371	897
542917	chr4	151559524	151562309	AC110813.1	chr4	151563504	151564996	317	177	40	178
296608	chr17	75420227	75431898	AC111170.3	chr17	75400914	75418792	157	11	116	94.6667
571624	chr5	54146426	54152522	AC112198.1	chr5	53608627	53617148	8	16	10	11.3333
571624	chr5	54146426	54152522	AC112198.1	chr5	54160352	54161925	270	207	94	190.333
458242	chr3	72310003	72312584	AC112219.1	chr3	71771208	71780468	32	27	7	22
458242	chr3	72310003	72312584	AC112219.1	chr3	72003880	72014054	84	86	27	65.6667
458242	chr3	72310003	72312584	AC112219.1	chr3	72136025	72153754	49	80	30	53
458242	chr3	72310003	72312584	AC112219.1	chr3	72314997	72315615	806	545	225	525.333
458242	chr3	72310003	72312584	AC112219.1	chr3	72709886	72716356	21	29	8	19.3333
458242	chr3	72310003	72312584	AC112219.1	chr3	72862183	72871088	43	37	11	30.3333
518713	chr4	77413695	77421053	AC112249.1	chr4	77423120	77423906	844	552	218	538
518713	chr4	77413695	77421053	AC112249.1	chr4	78127282	78145346	13	11	8	10.6667
518713	chr4	77413695	77421053	AC112249.1	chr4	78272402	78281834	11	8	3	7.33333
451176	chr3	47642666	47648585	AC112512.1	chr3	47635246	47642564	403	450	94	315.667
484822	chr3	159941781	159946589	AC112641.1	chr3	159936929	159938824	970	679	233	627.333
256227	chr15	93827543	93831528	AC112693.1	chr15	93834058	93841381	103	84	65	84
402407	chr2	238165570	238166755	AC112715.2	chr2	238158032	238163112	900	634	231	588.333
402461	chr2	238332414	238337544	AC112721.1	chr2	238070671	238074068	68	63	39	56.6667
402461	chr2	238332414	238337544	AC112721.1	chr2	238343967	238352700	385	352	227	321.333
792153	chrX	25224260	25224756	AC112778.1	chrX	25215248	25230177	190	111	36	112.333
719735	chr8	42946616	42950941	AC113191.1	chr8	42952052	42960535	930	375	131	478.667
719735	chr8	42946616	42950941	AC113191.1	chr8	43303139	43304108	41	27	15	27.6667
719735	chr8	42946616	42950941	AC113191.1	chr8	43551596	43556377	24	25	12	20.3333
565619	chr5	34524205	34527732	AC114302.1	chr5	34511260	34523845	247	433	178	286
565619	chr5	34524205	34527732	AC114302.1	chr5	34893786	34907574	49	51	13	37.6667
565619	chr5	34524205	34527732	AC114302.1	chr5	35853271	35872884	5	3	2	3.33333
29638	chr1	107988292	107992191	AC114491.1	chr1	108290419	108293298	48	58	17	41
29664	chr1	108107960	108117229	AC114491.2	chr1	107685362	107702098	11	7	3	7
54405	chr1	215061912	215066242	AC114496.1	chr1	215056369	215058733	156	82	60	99.3333
239795	chr15	35268876	35270916	AC114546.1	chr15	35731448	35740091	10	7	3	6.66667
403369	chr2	242751360	242773821	AC114730.3	chr2	242774857	242775643	221	157	106	161.333
403360	chr2	242687424	242697786	AC114730.7	chr2	242679671	242684947	175	77	73	108.333
397470	chr2	221048114	221058160	AC114765.1	chr2	221058682	221062448	76	44	26	48.6667
352615	chr2	69681751	69695641	AC114772.1	chr2	69698626	69701094	858	506	200	521.333
402812	chr2	239893547	239896559	AC114788.1	chr2	239897341	239901242	591	204	342	379
553156	chr4	183741759	183750195	AC114798.1	chr4	184169834	184177420	6	4	9	6.33333
397265	chr2	220160298	220164682	AC114803.3	chr2	219908350	219923255	15	16	25	18.6667
397265	chr2	220160298	220164682	AC114803.3	chr2	220116679	220133862	59	42	41	47.3333
332263	chr2	1060315	1064661	AC114808.3	chr2	1058457	1059170	692	549	226	489
332877	chr2	3486045	3506592	AC114810.5	chr2	3476674	3485249	18	8	32	19.3333
445016	chr3	26792275	26802542	AC114877.1	chr3	26804274	26806953	481	406	120	335.667
568551	chr5	43185152	43196278	AC114947.1	chr5	43386161	43396649	20	28	12	20
7424	chr1	34640946	34643851	AC115286.1	chr1	34637702	34640428	352	301	178	277
448767	chr3	38944444	38951566	AC116038.1	chr3	38940475	38942365	170	107	64	113.667
448724	chr3	38841385	38841899	AC116038.2	chr3	38842218	38842942	1027	788	765	860
735728	chr8	96689854	96691658	AC116154.1	chr8	96684256	96694707	59	30	41	43.3333
577435	chr5	72449259	72453718	AC116345.1	chr5	72455865	72456323	29	16	30	25
596348	chr5	131758776	131769186	AC116366.5	chr5	131778587	131781009	211	169	97	159
596348	chr5	131758776	131769186	AC116366.5	chr5	132044785	132055549	10	8	6	8
596357	chr5	131802698	131812303	AC116366.6	chr5	131814628	131819987	251	75	184	170
107092	chr11	17091057	17100015	AC116533.1	chr11	16808632	16822315	44	38	22	34.6667
332229	chr2	940123	949577	AC116614.1	chr2	954226	954884	293	217	97	202.333
332229	chr2	940123	949577	AC116614.1	chr2	1553448	1555907	10	15	7	10.6667
473766	chr3	123780446	123789572	AC117401.1	chr3	123774796	123777562	502	387	173	354
491683	chr3	181417166	181417570	AC117415.1	chr3	181047216	181063207	12	30	17	19.6667
491683	chr3	181417166	181417570	AC117415.1	chr3	181410766	181425122	237	263	218	239.333
491683	chr3	181417166	181417570	AC117415.1	chr3	181973063	181980301	10	19	8	12.3333
491683	chr3	181417166	181417570	AC117415.1	chr3	182397963	182401758	31	18	33	27.3333
465027	chr3	96384810	96387175	AC117444.1	chr3	96378993	96381731	240	119	70	143
328553	chr19	40699298	40714988	AC118344.2	chr19	40694580	40696027	51	50	40	47
471204	chr3	115399992	115402594	AC119795.1	chr3	114811885	114825687	24	19	8	17
471204	chr3	115399992	115402594	AC119795.1	chr3	114937056	114950399	30	43	15	29.3333
471204	chr3	115399992	115402594	AC119795.1	chr3	115390566	115395263	337	273	95	235
727745	chr8	71482697	71503116	AC120194.1	chr8	71051523	71063924	13	6	3	7.33333
727745	chr8	71482697	71503116	AC120194.1	chr8	71508116	71508285	122	95	79	98.6667
526472	chr4	101043625	101058516	AC121157.1	chr4	101059184	101062535	118	105	38	87
526472	chr4	101043625	101058516	AC121157.1	chr4	101653537	101668950	5	6	5	5.33333
475606	chr3	130826902	130837187	AC121332.1	chr3	130822395	130825803	279	139	62	160
153499	chr12	39829256	39837434	AC121334.1	chr12	39816546	39827033	129	303	80	170.667
153607	chr12	40199842	40205192	AC121336.1	chr12	40207519	40208088	58	40	20	39.3333
396347	chr2	216741724	216744901	AC122136.1	chr2	216315515	216317373	13	7	6	8.66667
396347	chr2	216741724	216744901	AC122136.1	chr2	216618355	216625753	30	28	13	23.6667
396347	chr2	216741724	216744901	AC122136.1	chr2	216740733	216741281	300	212	78	196.667
718766	chr8	39416581	39423158	AC123767.1	chr8	39413384	39413779	322	201	159	227.333
676389	chr7	50411807	50412756	AC124014.1	chr7	50415143	50415515	494	361	300	385
403078	chr2	241200117	241204178	AC124861.1	chr2	241206747	241207818	976	699	279	651.333
403078	chr2	241200117	241204178	AC124861.1	chr2	241734826	241743741	15	12	4	10.3333
392370	chr2	204626738	204632016	AC125238.1	chr2	204639327	204640270	190	154	60	134.667
247930	chr15	62526730	62549847	AC126323.2	chr15	62518015	62521202	139	107	56	100.667
297302	chr17	78971085	78980823	AC127496.1	chr17	78980928	78981412	90	32	65	62.3333
162203	chr12	69591231	69599811	AC127894.1	chr12	69588436	69589064	51	40	29	40
280334	chr17	7977175	8003541	AC129492.6	chr17	7963049	7969570	54	8	56	39.3333
264357	chr16	23763840	23767231	AC130454.2	chr16	23769479	23779268	308	505	330	381
264357	chr16	23763840	23767231	AC130454.2	chr16	24041772	24047076	32	22	17	23.6667
264357	chr16	23763840	23767231	AC130454.2	chr16	24591186	24607720	11	10	5	8.66667
273257	chr16	68089122	68097049	AC130462.1	chr16	68076397	68087371	98	66	50	71.3333
550880	chr4	176387041	176398020	AC131094.1	chr4	176401618	176404985	258	143	38	146.333
492276	chr3	183516859	183523613	AC131160.1	chr3	184571837	184584991	3	3	2	2.66667
715909	chr8	29786004	29791167	AC131254.1	chr8	29794086	29794987	106	69	39	71.3333
102853	chr11	2965308	2972282	AC131971.3	chr11	2961720	2962789	557	208	217	327.333
274477	chr16	73016384	73022136	AC132068.1	chr16	72143779	72161463	23	16	5	14.6667
274477	chr16	73016384	73022136	AC132068.1	chr16	72528019	72536516	39	19	15	24.3333
274477	chr16	73016384	73022136	AC132068.1	chr16	72882403	72895421	59	49	29	45.6667
272921	chr16	66519353	66529046	AC132186.2	chr16	66544632	66552064	124	88	87	99.6667
112443	chr11	33899900	33906435	AC132216.1	chr11	33907578	33908380	736	560	335	543.667
266023	chr16	31072183	31083126	AC135050.1	chr16	31056133	31061528	74	55	95	74.6667
280375	chr17	8220854	8222465	AC135178.7	chr17	8223703	8231711	246	22	102	123.333
710906	chr8	12807448	12809754	AC135352.1	chr8	12604903	12611218	9	7	9	8.33333
710906	chr8	12807448	12809754	AC135352.1	chr8	12804686	12807242	156	68	94	106
710902	chr8	12800533	12804685	AC135352.2	chr8	12805189	12807242	609	386	158	384.333
710902	chr8	12800533	12804685	AC135352.2	chr8	13518072	13523279	23	17	13	17.6667
285044	chr17	29701174	29707014	AC135724.1	chr17	29710005	29713800	933	663	249	615
285044	chr17	29701174	29707014	AC135724.1	chr17	30177316	30184497	68	51	19	46
266793	chr16	34255114	34258726	AC135776.1	chr16	34265823	34266208	440	348	182	323.333
443791	chr3	23241132	23244119	AC135966.1	chr3	23007065	23021011	5	10	4	6.33333
443791	chr3	23241132	23244119	AC135966.1	chr3	23233940	23234948	66	41	37	48
443791	chr3	23241132	23244119	AC135966.1	chr3	23369920	23385808	10	7	4	7
163768	chr12	74292225	74298847	AC136188.1	chr12	74282727	74287973	82	79	35	65.3333
718830	chr8	39611518	39615112	AC136365.1	chr8	39619621	39622140	216	162	119	165.667
237583	chr15	27393597	27407391	AC136896.1	chr15	27409684	27411227	435	431	111	325.667
170146	chr12	93474916	93491944	AC138123.1	chr12	93492530	93498096	112	17	19	49.3333
170146	chr12	93474916	93491944	AC138123.1	chr12	93630205	93641537	24	14	6	14.6667
170146	chr12	93474916	93491944	AC138123.1	chr12	93774110	93790828	19	27	15	20.3333
288181	chr17	43306627	43324157	AC138150.4	chr17	43326206	43328870	123	26	116	88.3333
749920	chr8	142519161	142530635	AC138647.1	chr8	142533079	142534409	315	147	153	205
749920	chr8	142519161	142530635	AC138647.1	chr8	143323795	143343743	7	4	5	5.33333
496640	chr4	735083	759154	AC139887.4	chr4	761564	763811	80	51	55	62
162180	chr12	69506135	69511963	AC139931.1	chr12	69498830	69503971	177	204	120	167
162180	chr12	69506135	69511963	AC139931.1	chr12	69648344	69648569	14	7	12	11
561665	chr5	21733658	21735868	AC140132.1	chr5	21729702	21738946	39	92	26	52.3333
518109	chr4	75513396	75516680	AC142293.3	chr4	75231523	75242057	28	24	9	20.3333
518109	chr4	75513396	75516680	AC142293.3	chr4	75508460	75513147	299	266	165	243.333
332882	chr2	3517384	3523883	AC142528.1	chr2	2689836	2700734	14	11	5	10
332882	chr2	3517384	3523883	AC142528.1	chr2	4171584	4184246	5	9	5	6.33333
375142	chr2	150438437	150444007	AC144449.1	chr2	149873142	149880948	42	11	8	20.3333
375142	chr2	150438437	150444007	AC144449.1	chr2	150008604	150024914	20	12	3	11.6667
375142	chr2	150438437	150444007	AC144449.1	chr2	150425709	150435554	287	133	98	172.667
375142	chr2	150438437	150444007	AC144449.1	chr2	151333175	151340167	17	7	5	9.66667
375142	chr2	150438437	150444007	AC144449.1	chr2	151452840	151458205	15	6	4	8.33333
375142	chr2	150438437	150444007	AC144449.1	chr2	151765352	151771711	20	5	5	10
332394	chr2	1603355	1625382	AC144450.1	chr2	589027	598674	4	9	5	6
332394	chr2	1603355	1625382	AC144450.1	chr2	1629935	1633376	290	239	101	210
175312	chr12	111066104	111084198	AC144522.1	chr12	111094654	111095755	184	110	73	122.333
174989	chr12	109423896	109436516	AC190387.1	chr12	109366411	109367923	7	10	11	9.33333
288305	chr17	43919210	43926368	AC217771.1	chr17	43706838	43726081	56	43	45	48
350892	chr2	64104232	64112794	ACA59.1	chr2	63914484	63919847	35	30	21	28.6667
350892	chr2	64104232	64112794	ACA59.1	chr2	64100307	64103426	222	151	100	157.667
384599	chr2	179886965	179893096	ACA59.2	chr2	179881264	179896296	506	686	208	466.667
135969	chr11	114996110	115001315	ACA59.3	chr11	114203645	114210454	6	6	3	5
261414	chr16	12389969	12395540	ACA64.1	chr16	12396786	12398066	1183	921	378	827.333
807565	chrX	80101741	80119843	ACA64.4	chrX	80663116	80674647	3	2	5	3.33333
809917	chrX	87399841	87404097	ACA64.5	chrX	87394281	87399455	176	165	37	126
448541	chr3	38172857	38183749	ACAA1	chr3	38513114	38524566	17	12	6	11.6667
311213	chr18	47339155	47341273	ACAA2	chr18	47014346	47022582	119	85	48	84
311213	chr18	47339155	47341273	ACAA2	chr18	47336580	47349099	805	858	328	663.667
311213	chr18	47339155	47341273	ACAA2	chr18	47798131	47799465	31	26	9	22
311213	chr18	47339155	47341273	ACAA2	chr18	48554638	48568194	17	15	9	13.6667
286629	chr17	35760663	35771365	ACACA	chr17	35780172	35780940	308	214	84	202
476133	chr3	132377167	132380058	ACAD11	chr3	132252559	132259525	123	106	38	89
476133	chr3	132377167	132380058	ACAD11	chr3	132372187	132385478	509	347	350	402
394427	chr2	211086927	211091873	ACADL	chr2	210833767	210836776	50	41	24	38.3333
177815	chr12	121162947	121185293	ACADS	chr12	121149783	121158544	400	226	126	250.667
280191	chr17	7114907	7125387	ACADVL	chr17	7131682	7133291	371	153	256	260
255103	chr15	89345586	89351106	ACAN	chr15	89341277	89342888	221	77	164	154
280205	chr17	7238218	7247884	ACAP1	chr17	6721508	6739769	3	3	8	4.66667
280205	chr17	7238218	7247884	ACAP1	chr17	6941133	6943310	27	12	26	21.6667
495785	chr3	195162417	195166617	ACAP2	chr3	195150991	195161326	687	453	515	551.667
133868	chr11	107982760	107992465	ACAT1	chr11	107975842	107980232	902	654	157	571
133868	chr11	107982760	107992465	ACAT1	chr11	108520592	108526967	29	15	8	17.3333
658650	chr6	160181052	160182218	ACAT2	chr6	160373599	160387401	34	34	15	27.6667
658650	chr6	160181052	160182218	ACAT2	chr6	160468708	160484376	35	21	7	21
57891	chr1	226364150	226376557	ACBD3	chr1	226377433	226384835	383	320	180	294.333
72272	chr10	27524501	27534566	ACBD5	chr10	27535553	27535751	174	189	129	164
72272	chr10	27524501	27534566	ACBD5	chr10	27803120	27815084	13	8	7	9.33333
44154	chr1	180471076	180472609	ACBD6	chr1	180210059	180226408	39	39	23	33.6667
44154	chr1	180471076	180472609	ACBD6	chr1	180464624	180475113	1222	788	251	753.667
44154	chr1	180471076	180472609	ACBD6	chr1	180828529	180842448	58	74	31	54.3333
44154	chr1	180471076	180472609	ACBD6	chr1	181120939	181131987	63	32	15	36.6667
44154	chr1	180471076	180472609	ACBD6	chr1	181385101	181392763	10	14	10	11.3333
68596	chr10	15129208	15136019	ACBD7	chr10	14537831	14551449	23	23	9	18.3333
285779	chr17	32480180	32487023	ACCN1	chr17	32106462	32108258	155	144	54	117.667
285779	chr17	32480180	32487023	ACCN1	chr17	32476548	32478654	1009	835	292	712
156659	chr12	50443134	50452299	ACCN2	chr12	51090240	51109265	4	9	4	5.66667
397305	chr2	220371494	220383596	ACCN4	chr2	220263747	220275435	47	33	61	47
544517	chr4	156786207	156789057	ACCN5	chr4	156780779	156785997	143	64	34	80.3333
115636	chr11	44087024	44098121	ACCS	chr11	43910278	43923344	17	12	10	13
115636	chr11	44087024	44098121	ACCS	chr11	44084665	44103407	185	127	82	131.333
115628	chr11	44068373	44071468	ACCSL	chr11	43582685	43592631	11	14	4	9.66667
115628	chr11	44068373	44071468	ACCSL	chr11	43910278	43925329	51	55	29	45
115628	chr11	44068373	44071468	ACCSL	chr11	44062384	44078763	455	476	161	364
273170	chr16	67684481	67698216	ACD	chr16	67672322	67674057	234	173	114	173.667
293068	chr17	61548609	61558823	ACE	chr17	61524925	61538321	167	107	81	118.333
789319	chrX	15618031	15622794	ACE2	chrX	15614987	15617168	489	314	107	303.333
789319	chrX	15618031	15622794	ACE2	chrX	15986350	16005160	3	3	4	3.33333
123873	chr11	76566181	76584526	ACER3	chr11	76584621	76591276	731	546	163	480
370315	chr2	135596054	135596900	ACMSD	chr2	135595006	135596020	876	577	233	562
689404	chr7	96743050	96746650	ACN9	chr7	95534013	95544558	12	15	4	10.3333
689404	chr7	96743050	96746650	ACN9	chr7	95756212	95774971	29	12	7	16
689404	chr7	96743050	96746650	ACN9	chr7	96149765	96162086	14	8	6	9.33333
689404	chr7	96743050	96746650	ACN9	chr7	96748277	96761066	192	168	79	146.333
689404	chr7	96743050	96746650	ACN9	chr7	97476503	97477940	76	42	18	45.3333
760862	chr9	32382623	32396972	ACO1	chr9	32375202	32376557	149	111	64	108
760862	chr9	32382623	32396972	ACO1	chr9	32563729	32572016	65	70	25	53.3333
760862	chr9	32382623	32396972	ACO1	chr9	32969214	32976549	33	25	9	22.3333
434973	chr22	41864756	41866344	ACO2	chr22	41253799	41262654	11	35	7	17.6667
434973	chr22	41864756	41866344	ACO2	chr22	41860671	41869116	2214	1613	239	1355.33
12664	chr1	55000713	55017339	ACOT11	chr1	54556324	54564267	3	3	3	3
579934	chr5	80686668	80693147	ACOT12	chr5	80681807	80698250	389	248	133	256.667
453894	chr3	58521219	58523884	ACOX2	chr3	59266200	59285362	11	10	6	9
498219	chr4	8441319	8455074	ACOX3	chr4	8469685	8481969	48	33	18	33
363233	chr2	111488837	111492524	ACOXL	chr2	111493412	111495462	756	568	228	517.333
332065	chr2	262406	274455	ACP1	chr2	261892	262247	290	195	134	206.333
332065	chr2	262406	274455	ACP1	chr2	646853	666487	17	12	13	14
34692	chr1	147138865	147143119	ACP6	chr1	146977119	146992722	30	34	13	25.6667
34692	chr1	147138865	147143119	ACP6	chr1	147138009	147138770	583	359	180	374
34692	chr1	147138865	147143119	ACP6	chr1	147357249	147365064	63	63	20	48.6667
478658	chr3	140945205	140948298	ACPL2	chr3	140797163	140812070	16	17	13	15.3333
478658	chr3	140945205	140948298	ACPL2	chr3	140954294	140955409	142	129	64	111.667
476015	chr3	132028649	132048569	ACPP	chr3	132049872	132052289	335	244	208	262.333
804890	chrX	70795538	70801743	ACRC	chrX	70782235	70786089	89	81	40	70
138900	chr11	125550752	125552321	ACRV1	chr11	125552385	125553682	78	56	50	61.3333
321232	chr19	6126548	6136182	ACSBG2	chr19	6138387	6141019	313	292	143	249.333
321232	chr19	6126548	6136182	ACSBG2	chr19	6298470	6313622	84	64	39	62.3333
289407	chr17	48499931	48505215	ACSF2	chr17	48506623	48511723	567	431	185	394.333
278485	chr16	89154236	89165493	ACSF3	chr16	89165897	89175808	109	43	62	71.3333
553738	chr4	185746200	185769431	ACSL1	chr4	185771069	185771920	733	563	268	521.333
398337	chr2	223725185	223727564	ACSL3	chr2	223716915	223733934	412	348	125	295
96589	chr10	114130957	114134676	ACSL5	chr10	114135171	114147600	98	77	44	73
263559	chr16	20708093	20710422	ACSM1	chr16	20394389	20403851	30	34	14	26
263559	chr16	20708093	20710422	ACSM1	chr16	20703799	20707676	1040	1019	269	776
263559	chr16	20708093	20710422	ACSM1	chr16	21092789	21109982	23	17	13	17.6667
263577	chr16	20775177	20776937	ACSM3	chr16	21086457	21098076	33	36	23	30.6667
143647	chr12	7455402	7459564	ACSM4	chr12	7459871	7460634	697	501	199	465.667
143647	chr12	7455402	7459564	ACSM4	chr12	7768233	7773800	33	19	16	22.6667
410693	chr20	25036380	25043735	ACSS1	chr20	24118133	24135458	6	13	4	7.66667
410693	chr20	25036380	25043735	ACSS1	chr20	25019530	25026142	341	254	112	235.667
410693	chr20	25036380	25043735	ACSS1	chr20	25184706	25202201	61	45	15	40.3333
411846	chr20	33452578	33468129	ACSS2	chr20	33469650	33470764	123	63	56	80.6667
58667	chr1	229562492	229571968	ACTA1	chr1	228785399	228800703	28	22	11	20.3333
58667	chr1	229562492	229571968	ACTA1	chr1	229558678	229578071	350	349	312	337
89679	chr10	90751013	90752197	ACTA2	chr10	90748291	90756761	749	432	176	452.333
89679	chr10	90751013	90752197	ACTA2	chr10	90971551	90976094	82	36	31	49.6667
89679	chr10	90751013	90752197	ACTA2	chr10	91143093	91150779	13	18	7	12.6667
572382	chr5	56777073	56779944	ACTBL2	chr5	56780341	56780754	630	428	210	422.667
572382	chr5	56777073	56779944	ACTBL2	chr5	57054327	57070347	31	29	9	23
572382	chr5	56777073	56779944	ACTBL2	chr5	58137354	58155493	15	11	4	10
353783	chr2	74117980	74121856	ACTG2	chr2	74322798	74330102	20	48	27	31.6667
491008	chr3	179278890	179288214	ACTL6A	chr3	179131033	179135128	34	24	12	23.3333
491008	chr3	179278890	179288214	ACTL6A	chr3	179289235	179290116	270	201	99	190
778003	chr9	111622012	111628859	ACTL7A	chr9	111631182	111641389	680	417	162	419.667
778002	chr9	111613777	111622011	ACTL7B	chr9	111628860	111641389	189	302	88	193
3783	chr1	18080410	18082292	ACTL8	chr1	18089207	18090853	118	31	79	76
60733	chr1	236840537	236853707	ACTN2	chr1	236833292	236838968	621	457	174	417.333
222305	chr14	58662860	58667225	ACTR10	chr14	58668775	58678751	52	131	37	73.3333
93543	chr10	104261258	104262550	ACTR1A	chr10	103988665	103997527	21	16	15	17.3333
93543	chr10	104261258	104262550	ACTR1A	chr10	104257768	104258690	809	382	240	477
359466	chr2	98279112	98286492	ACTR1B	chr2	98286925	98299347	683	313	183	393
351318	chr2	65452489	65459470	ACTR2	chr2	65463141	65466251	392	311	116	273
351318	chr2	65452489	65459470	ACTR2	chr2	65772001	65779676	46	48	18	37.3333
364107	chr2	114645986	114651473	ACTR3	chr2	114505365	114517379	76	56	28	53.3333
705599	chr7	152450889	152457916	ACTR3B	chr7	151887529	151894457	23	26	13	20.6667
705599	chr7	152450889	152457916	ACTR3B	chr7	152014034	152022066	58	65	26	49.6667
705599	chr7	152450889	152457916	ACTR3B	chr7	152444176	152459327	1355	878	131	788
412705	chr20	37372292	37382197	ACTR5	chr20	37386285	37397200	6	9	7	7.33333
172361	chr12	100584952	100596174	ACTR6	chr12	100576329	100579803	363	255	113	243.667
452582	chr3	53915522	53924632	ACTR8	chr3	53377292	53378435	37	23	22	27.3333
452582	chr3	53915522	53924632	ACTR8	chr3	53924647	53925185	1112	716	246	691.333
487	chr1	2927637	2944794	ACTRT2	chr1	2923852	2925227	509	381	230	373.333
487	chr1	2927637	2944794	ACTRT2	chr1	3338276	3343969	69	51	58	59.3333
377870	chr2	158732161	158733757	ACVR1	chr2	158734287	158749770	479	243	64	262
377870	chr2	158732161	158733757	ACVR1	chr2	158860616	158862439	125	72	29	75.3333
377790	chr2	158474399	158485896	ACVR1C	chr2	158162013	158173218	25	6	12	14.3333
377790	chr2	158474399	158485896	ACVR1C	chr2	158487433	158488112	618	142	192	317.333
374564	chr2	148599900	148603822	ACVR2A	chr2	147844044	147844463	63	35	19	39
374564	chr2	148599900	148603822	ACVR2A	chr2	148296049	148315911	36	55	16	35.6667
374564	chr2	148599900	148603822	ACVR2A	chr2	148595658	148599242	895	516	124	511.667
374564	chr2	148599900	148603822	ACVR2A	chr2	149830594	149835593	7	6	2	5
157074	chr12	52283133	52306764	ACVRL1	chr12	52370789	52375307	47	20	48	38.3333
121775	chr11	67417569	67429735	ACY3	chr11	67431098	67438454	161	75	130	122
227286	chr14	75534123	75537115	ACYP1	chr14	75530876	75532729	1470	984	403	952.333
347868	chr2	54339451	54349206	ACYP2	chr2	54715708	54732863	36	34	25	31.6667
347868	chr2	54339451	54349206	ACYP2	chr2	54883301	54888687	20	11	18	16.3333
327676	chr19	36065800	36067544	AD000090.1	chr19	36061677	36064671	123	95	63	93.6667
327667	chr19	36033658	36039398	AD000090.2	chr19	36041759	36046958	264	92	155	170.333
327701	chr19	36204880	36219241	AD000671.1	chr19	36189643	36200395	91	69	129	96.3333
327756	chr19	36598109	36616321	AD001527.1	chr19	37161432	37177994	7	5	3	5
414361	chr20	43276192	43283807	ADA	chr20	43283892	43290243	517	333	232	360.667
414361	chr20	43276192	43283807	ADA	chr20	43498241	43510363	12	16	9	12.3333
533728	chr4	123295978	123300136	ADAD1	chr4	123303556	123317673	187	69	21	92.3333
277590	chr16	84221012	84225814	ADAD2	chr16	84116111	84119614	102	66	74	80.6667
246874	chr15	59040631	59042709	ADAM10	chr15	58153017	58161838	8	6	3	5.66667
246874	chr15	59040631	59042709	ADAM10	chr15	58547415	58561250	134	72	30	78.6667
246874	chr15	59040631	59042709	ADAM10	chr15	58728544	58741880	124	89	9	74
246874	chr15	59040631	59042709	ADAM10	chr15	59031273	59038284	605	412	238	418.333
288124	chr17	42832618	42839130	ADAM11	chr17	42827706	42831703	159	89	86	111.333
100589	chr10	128070588	128077489	ADAM12	chr10	127665946	127672882	58	42	25	41.6667
334707	chr2	9689098	9699428	ADAM17	chr2	9705442	9712101	371	293	100	254.667
334707	chr2	9689098	9699428	ADAM17	chr2	9889663	9900753	46	42	21	36.3333
718773	chr8	39440950	39442904	ADAM18	chr8	39433678	39437609	200	172	99	157
603664	chr5	156995435	157004260	ADAM19	chr5	157007628	157019730	282	248	92	207.333
718854	chr8	39692762	39698179	ADAM2	chr8	39191638	39208614	7	15	3	8.33333
718854	chr8	39692762	39698179	ADAM2	chr8	39684995	39690442	517	220	87	274.667
226000	chr14	70998144	71002275	ADAM20	chr14	70561033	70572688	8	9	4	7
226000	chr14	70998144	71002275	ADAM20	chr14	70995565	71008011	248	131	48	142.333
225974	chr14	70922915	70927901	ADAM21	chr14	70916304	70917894	7	5	9	7
686488	chr7	87561215	87565620	ADAM22	chr7	87567907	87569692	114	54	40	69.3333
393191	chr2	207305427	207314172	ADAM23	chr2	207320209	207324414	183	161	57	133.667
33335	chr1	120431471	120440812	ADAM30	chr1	120444241	120448469	944	800	291	678.333
718616	chr8	38962142	38967986	ADAM32	chr8	38690656	38696776	12	15	9	12
718616	chr8	38962142	38967986	ADAM32	chr8	38956180	38959652	442	311	113	288.667
714348	chr8	24297853	24300033	ADAM7	chr8	23706404	23720224	14	19	5	12.6667
714348	chr8	24297853	24300033	ADAM7	chr8	24292420	24303992	537	492	205	411.333
714331	chr8	24238062	24251886	ADAMDEC1	chr8	24253345	24255134	293	226	77	198.667
423843	chr21	28214457	28218321	ADAMTS1	chr21	28211715	28219896	654	344	191	396.333
423843	chr21	28214457	28218321	ADAMTS1	chr21	28935622	28942833	83	55	24	54
423843	chr21	28214457	28218321	ADAMTS1	chr21	29065054	29076703	132	101	25	86
321597	chr19	8670773	8673929	ADAMTS10	chr19	8658751	8659414	144	84	130	119.333
565411	chr5	33890114	33892962	ADAMTS12	chr5	33896017	33901917	447	347	170	321.333
140331	chr11	130316168	130326205	ADAMTS15	chr11	130330692	130333149	308	247	171	242
140331	chr11	130316168	130326205	ADAMTS15	chr11	130719667	130725266	90	99	53	80.6667
258385	chr15	100880331	100885379	ADAMTS17	chr15	99810378	99827543	6	3	8	5.66667
258385	chr15	100880331	100885379	ADAMTS17	chr15	100466364	100478628	19	17	7	14.3333
258385	chr15	100880331	100885379	ADAMTS17	chr15	100869325	100877866	80	48	78	68.6667
258385	chr15	100880331	100885379	ADAMTS17	chr15	101110300	101111757	53	40	31	41.3333
258385	chr15	100880331	100885379	ADAMTS17	chr15	101407914	101424749	11	7	6	8
275710	chr16	77464853	77472366	ADAMTS18	chr16	77456906	77475866	338	471	178	329
595462	chr5	128791627	128798272	ADAMTS19	chr5	128798774	128811639	422	286	129	279
609982	chr5	178767617	178777381	ADAMTS2	chr5	178778518	178786443	294	286	215	265
154827	chr12	43942186	43950458	ADAMTS20	chr12	43922625	43934180	194	68	37	99.6667
517423	chr4	73433084	73442570	ADAMTS3	chr4	73419945	73424581	261	248	74	194.333
423900	chr21	28335109	28341607	ADAMTS5	chr21	28330224	28347130	473	385	100	319.333
423900	chr21	28335109	28341607	ADAMTS5	chr21	28930447	28939945	18	12	6	12
423900	chr21	28335109	28341607	ADAMTS5	chr21	29594885	29610802	26	11	6	14.3333
575102	chr5	64777556	64778174	ADAMTS6	chr5	63512222	63517645	13	8	3	8
575102	chr5	64777556	64778174	ADAMTS6	chr5	63917285	63926208	18	20	9	15.6667
575102	chr5	64777556	64778174	ADAMTS6	chr5	64105189	64109332	214	45	65	108
575102	chr5	64777556	64778174	ADAMTS6	chr5	64255369	64260764	162	34	29	75
140327	chr11	130296757	130307018	ADAMTS8	chr11	130307035	130316167	326	295	123	248
140327	chr11	130296757	130307018	ADAMTS8	chr11	130506188	130517168	37	33	24	31.3333
140327	chr11	130296757	130307018	ADAMTS8	chr11	130723356	130727888	194	135	72	133.667
455872	chr3	64672693	64676281	ADAMTS9	chr3	64677632	64684682	529	437	98	354.667
455827	chr3	64546185	64548376	ADAMTS9-AS1	chr3	64544110	64552511	806	505	267	526
756352	chr9	18473002	18476310	ADAMTSL1	chr9	18467358	18479182	589	481	187	419
784338	chr9	136395933	136408466	ADAMTSL2	chr9	136391995	136392687	180	20	110	103.333
784338	chr9	136395933	136408466	ADAMTSL2	chr9	136582961	136598130	17	8	17	14
35488	chr1	150501621	150544031	ADAMTSL4	chr1	150545578	150548667	404	279	122	268.333
661950	chr7	992498	1000005	ADAP1	chr7	1004237	1011728	284	33	143	153.333
36484	chr1	154596617	154601605	ADAR	chr1	154846952	154864111	61	46	42	49.6667
428918	chr21	46491229	46496124	ADARB1	chr21	46484355	46501432	751	366	214	443.667
64829	chr10	1779435	1780609	ADARB2	chr10	1783018	1785357	590	371	257	406
275174	chr16	75655746	75664032	ADAT1	chr16	75664405	75674700	110	82	44	78.6667
275174	chr16	75655746	75664032	ADAT1	chr16	75800605	75804809	9	14	5	9.33333
653761	chr6	143766881	143775109	ADAT2	chr6	142995376	143002605	25	13	4	14
653761	chr6	143766881	143775109	ADAT2	chr6	143355308	143371597	5	16	5	8.66667
653761	chr6	143766881	143775109	ADAT2	chr6	143758382	143762635	311	285	83	226.333
653761	chr6	143766881	143775109	ADAT2	chr6	144307397	144321305	11	12	3	8.66667
227962	chr14	78254385	78275373	ADCK1	chr14	78282927	78283606	41	28	19	29.3333
702203	chr7	140366555	140392221	ADCK2	chr7	140394467	140394772	65	50	64	59.6667
58065	chr1	227085018	227088371	ADCK3	chr1	227081717	227093521	468	232	217	305.667
328606	chr19	41215027	41238732	ADCK4	chr19	41199075	41201543	133	116	64	104.333
675016	chr7	45604128	45619671	ADCY1	chr7	45596746	45601938	236	184	105	175
40189	chr1	167883044	167896876	ADCY10	chr1	167880084	167882689	312	204	74	196.667
557337	chr5	7394055	7399507	ADCY2	chr5	6296318	6307847	7	3	5	5
557337	chr5	7394055	7399507	ADCY2	chr5	7390950	7391365	492	360	173	341.667
339201	chr2	25138835	25146662	ADCY3	chr2	25149728	25150079	704	428	394	508.667
339201	chr2	25138835	25146662	ADCY3	chr2	25367674	25375572	18	16	22	18.6667
211702	chr14	24800814	24805365	ADCY4	chr14	24893288	24908555	142	89	111	114
473578	chr3	123162907	123172340	ADCY5	chr3	124232120	124243303	4	6	5	5
156352	chr12	49174578	49186511	ADCY6	chr12	49164056	49168684	168	107	59	111.333
746873	chr8	132053643	132056079	ADCY8	chr8	132048636	132050513	275	193	138	202
746873	chr8	132053643	132056079	ADCY8	chr8	132446646	132465090	12	12	10	11.3333
746873	chr8	132053643	132056079	ADCY8	chr8	132812635	132816235	51	49	41	47
259473	chr16	4163681	4169290	ADCY9	chr16	4158019	4170554	482	288	375	381.667
297908	chr18	902775	912992	ADCYAP1	chr18	891934	902109	186	280	54	173.333
670820	chr7	31088446	31093505	ADCYAP1R1	chr7	30831605	30836355	15	14	16	15
670820	chr7	31088446	31093505	ADCYAP1R1	chr7	31077966	31085232	177	171	204	184
352942	chr2	70990316	71000235	ADD2	chr2	70546325	70557681	40	44	19	34.3333
352942	chr2	70990316	71000235	ADD2	chr2	70983939	70989372	929	395	225	516.333
[truncated: 28,129 more rows]
