# Supplementary material for: ChiCMaxima: a robust and simple pipeline for detection and visualization of chromatin looping in Capture Hi-C
Source: Genome Biol. 2019 May 22;20:102. doi: 10.1186/s13059-019-1706-3 (PMC6532271; doi:10.1186/s13059-019-1706-3)
Supplement: Supplementary file 11 — Table S10. List of human monocyte interactions called by ChiCMaxima from three CHi-C replicates. (XLSX 2381 kb) [file 13059_2019_1706_MOESM11_ESM.xlsx]

## Sheet: S10 - Mon CHi-C
Table S10. List of human monocyte interactions called by ChiCMaxima from three CHi-C replicates
ID_Bait	chr_Bait	start_Bait	end_Bait	Bait_name	chr_OE	start_OE	end_OE	N.1	N.2	N.3	N.mean
78445	chr10	52641291	52645702	A1CF	chr10	52637257	52639333	131	54	45	76.6667
206254	chr13	101241374	101243366	A2LD1	chr13	101247558	101248126	479	298	276	351
206254	chr13	101241374	101243366	A2LD1	chr13	101772072	101780725	8	9	7	8
144108	chr12	9268746	9269882	A2M	chr12	9790442	9805876	12	8	4	8
144042	chr12	8983123	8986825	A2ML1-AS1	chr12	8993917	9002538	125	122	122	123
144039	chr12	8972319	8975489	A2ML1-AS2	chr12	8988947	9001634	71	69	78	72.6667
178672	chr12	125541824	125553041	AACS	chr12	125535648	125541134	287	170	196	217.667
482073	chr3	151521668	151531842	AADAC	chr3	151165330	151184900	13	7	7	9
482073	chr3	151521668	151531842	AADAC	chr3	151534342	151534849	138	82	66	95.3333
2535	chr1	12773296	12776419	AADACL3	chr1	12766857	12770050	89	57	68	71.3333
549068	chr4	171010864	171015572	AADAT	chr4	170732748	170739159	15	7	13	11.6667
549068	chr4	171010864	171015572	AADAT	chr4	171005946	171009144	416	206	173	265
273743	chr16	70313654	70325070	AARS	chr16	70331538	70332963	821	452	395	556
622804	chr6	44279450	44288287	AARS2	chr6	44272756	44277380	762	284	230	425.333
287787	chr17	41128312	41133939	AARSD1	chr17	41121005	41127488	184	131	85	133.333
512394	chr4	57252367	57255776	AASDH	chr4	56214915	56225990	13	10	14	12.3333
512394	chr4	57252367	57255776	AASDH	chr4	56407952	56424877	16	6	8	10
512394	chr4	57252367	57255776	AASDH	chr4	56807452	56818528	36	29	25	30
512394	chr4	57252367	57255776	AASDH	chr4	57248161	57250022	995	358	447	600
512394	chr4	57252367	57255776	AASDH	chr4	57690780	57703045	55	31	41	42.3333
133220	chr11	105941458	105949844	AASDHPPT	chr11	105951629	105956198	59	160	153	124
696784	chr7	121780190	121788483	AASS	chr7	121794760	121795919	217	90	86	131
235738	chr14	106650092	106664716	AB019440.1	chr14	106665101	106667311	172	60	92	108
260602	chr16	8757589	8780880	ABAT	chr16	8782154	8782995	207	115	88	136.667
143599	chr12	7260342	7262367	ABC12-49244600F4.3	chr12	7254411	7256158	698	415	356	489.667
776826	chr9	107684509	107694252	ABCA1	chr9	107680051	107683097	385	201	160	248.667
294576	chr17	67240575	67245534	ABCA10	chr17	66768261	66772891	153	47	48	82.6667
294576	chr17	67240575	67245534	ABCA10	chr17	67237706	67249550	225	80	93	132.667
396091	chr2	215996772	216005331	ABCA12	chr2	216010023	216012222	265	95	109	156.333
259131	chr16	2388413	2395050	ABCA3	chr16	2401646	2406104	459	207	186	284
25311	chr1	94584058	94587741	ABCA4	chr1	94576598	94581355	334	62	221	205.667
25311	chr1	94584058	94587741	ABCA4	chr1	94788233	94802266	26	10	19	18.3333
25311	chr1	94584058	94587741	ABCA4	chr1	95292848	95301634	7	8	9	8
294607	chr17	67321593	67325780	ABCA5	chr17	67319260	67320760	241	93	90	141.333
294547	chr17	67137035	67148210	ABCA6	chr17	67149791	67152477	467	191	247	301.667
294502	chr17	66946677	66957316	ABCA8	chr17	66940902	66945724	137	55	39	77
294502	chr17	66946677	66957316	ABCA8	chr17	67203080	67219624	34	8	15	19
294525	chr17	67053971	67060673	ABCA9	chr17	66493849	66513177	12	4	8	8
294525	chr17	67053971	67060673	ABCA9	chr17	66768804	66775416	48	18	20	28.6667
294512	chr17	66999518	67013082	ABCA9-AS1	chr17	67015388	67018718	265	30	55	116.667
58705	chr1	229692817	229697283	ABCB10	chr1	228785399	228800107	36	13	25	24.6667
58705	chr1	229692817	229697283	ABCB10	chr1	229392370	229411208	56	27	24	35.6667
58705	chr1	229692817	229697283	ABCB10	chr1	230428818	230436819	15	25	11	17
381459	chr2	169881986	169889602	ABCB11	chr2	169878102	169880779	714	164	218	365.333
667588	chr7	20639530	20655362	ABCB5	chr7	20039781	20059760	10	6	8	8
667588	chr7	20639530	20655362	ABCB5	chr7	20360112	20363657	26	12	9	15.6667
397249	chr2	220077689	220091102	ABCB6	chr2	220091120	220102485	98	71	46	71.6667
805896	chrX	74371809	74378654	ABCB7	chrX	74365691	74368876	209	111	87	135.667
622623	chr6	43395091	43407679	ABCC10	chr6	42187668	42203602	3	3	4	3.33333
622623	chr6	43395091	43407679	ABCC10	chr6	42740616	42754205	6	11	6	7.66667
92879	chr10	101526826	101552246	ABCC2	chr10	101556338	101557602	329	115	125	189.667
204753	chr13	95951787	95955271	ABCC4	chr13	95959827	95960170	245	190	124	186.333
204753	chr13	95951787	95955271	ABCC4	chr13	96488973	96504433	5	9	8	7.33333
492332	chr3	183733408	183737933	ABCC5	chr3	183729356	183731411	506	272	247	341.667
492325	chr3	183724060	183724316	ABCC5-AS1	chr3	183725921	183732342	1008	368	363	579.667
492325	chr3	183724060	183724316	ABCC5-AS1	chr3	185033249	185045844	5	3	4	4
107204	chr11	17490949	17499574	ABCC8	chr11	17257253	17266534	18	9	15	14
107204	chr11	17490949	17499574	ABCC8	chr11	17502676	17504036	527	230	260	339
148149	chr12	22090571	22104163	ABCC9	chr12	22086938	22089783	158	42	40	80
153554	chr12	40010935	40014886	ABCD2	chr12	40015472	40016488	251	115	76	147.333
153554	chr12	40010935	40014886	ABCD2	chr12	40193307	40199841	9	6	5	6.66667
25405	chr1	94876094	94886259	ABCD3	chr1	94872649	94875510	205	72	93	123.333
25405	chr1	94876094	94886259	ABCD3	chr1	95261894	95277733	33	10	15	19.3333
25405	chr1	94876094	94886259	ABCD3	chr1	95421528	95437493	6	12	4	7.33333
25405	chr1	94876094	94886259	ABCD3	chr1	95527297	95544666	12	13	6	10.3333
227087	chr14	74768726	74798920	ABCD4	chr14	74763705	74765410	204	137	95	145.333
541105	chr4	146015816	146020399	ABCE1	chr4	145089112	145102012	35	9	8	17.3333
541105	chr4	146015816	146020399	ABCE1	chr4	145259497	145267309	7	6	10	7.66667
541105	chr4	146015816	146020399	ABCE1	chr4	146021133	146024668	463	182	206	283.667
492370	chr3	183902355	183908534	ABCF3	chr3	183887526	183892123	7	10	7	8
522588	chr4	89150699	89153356	ABCG2	chr4	88951804	88956368	30	9	16	18.3333
522588	chr4	89150699	89153356	ABCG2	chr4	89420731	89428486	28	25	17	23.3333
137048	chr11	119008735	119023006	ABCG4	chr11	119004390	119005164	308	226	201	245
344667	chr2	44064966	44069810	ABCG5	chr2	44069819	44070326	436	318	339	364.333
339740	chr2	27346267	27348910	ABHD1	chr2	27344914	27355885	183	171	114	156
470002	chr3	111695488	111699177	ABHD10	chr3	111386736	111391099	115	72	62	83
470002	chr3	111695488	111699177	ABHD10	chr3	111693619	111704349	728	217	234	393
470002	chr3	111695488	111699177	ABHD10	chr3	112272763	112279411	17	11	15	14.3333
410775	chr20	25366671	25376452	ABHD12	chr20	25354440	25359281	55	35	14	34.6667
220028	chr14	51338682	51347442	ABHD12B	chr14	51359143	51361164	67	24	37	42.6667
284587	chr17	27890004	27894879	ABHD15	chr17	27474198	27485395	9	8	5	7.33333
284587	chr17	27890004	27894879	ABHD15	chr17	27897714	27902713	293	304	214	270.333
284587	chr17	27890004	27894879	ABHD15	chr17	28431256	28433137	10	7	9	8.66667
284587	chr17	27890004	27894879	ABHD15	chr17	28794859	28808814	8	8	9	8.33333
284587	chr17	27890004	27894879	ABHD15	chr17	29144464	29162816	4	4	4	4
419076	chr20	62486746	62496889	ABHD16B	chr20	62497764	62507318	18	30	19	22.3333
255166	chr15	89621638	89633335	ABHD2	chr15	89615148	89616023	340	188	304	277.333
302448	chr18	19275306	19287427	ABHD3	chr18	19256864	19260660	8	7	8	7.66667
211271	chr14	23062238	23067559	ABHD4	chr14	23057021	23057695	121	111	104	112
450170	chr3	43724212	43735506	ABHD5	chr3	43737595	43739975	220	99	86	135
453819	chr3	58219742	58236777	ABHD6	chr3	59026597	59040855	3	2	2	2.33333
72175	chr10	27148168	27151789	ABI1	chr10	26619359	26636420	11	7	5	7.66667
289143	chr17	47286829	47292714	ABI3	chr17	47277724	47294205	207	204	107	172.667
466450	chr3	100709288	100714790	ABI3BP	chr3	100707589	100716522	377	135	70	194
783706	chr9	133576743	133589751	ABL1	chr9	133570966	133572318	320	200	238	252.667
783706	chr9	133576743	133589751	ABL1	chr9	133737675	133740312	85	72	52	69.6667
783706	chr9	133576743	133589751	ABL1	chr9	134838044	134855565	6	3	2	3.66667
43789	chr1	179196747	179205715	ABL2	chr1	179212634	179232214	32	38	41	37
97255	chr10	116442134	116447410	ABLIM1	chr10	116447894	116451804	464	165	148	259
498162	chr4	8152403	8167281	ABLIM2	chr4	8167399	8171790	91	81	54	75.3333
601171	chr5	148520758	148526858	ABLIM3	chr5	148514266	148516319	151	91	96	112.667
601171	chr5	148520758	148526858	ABLIM3	chr5	148644663	148646685	26	41	26	31
705148	chr7	150512976	150523919	ABP1	chr7	150134758	150142120	53	18	20	30.3333
705148	chr7	150512976	150523919	ABP1	chr7	150531544	150535628	306	124	158	196
618422	chr6	26593067	26601342	ABT1	chr6	26331308	26336825	45	23	42	36.6667
618422	chr6	26593067	26601342	ABT1	chr6	26585900	26591291	349	103	104	185.333
618422	chr6	26593067	26601342	ABT1	chr6	27445135	27455330	11	9	4	8
618422	chr6	26593067	26601342	ABT1	chr6	27716578	27722678	10	6	6	7.33333
474738	chr3	127388664	127399743	ABTB1	chr3	126416010	126432099	10	6	8	8
474738	chr3	127388664	127399743	ABTB1	chr3	126615097	126633123	5	5	4	4.66667
474738	chr3	127388664	127399743	ABTB1	chr3	127377634	127381578	197	126	116	146.333
474738	chr3	127388664	127399743	ABTB1	chr3	127678848	127688403	32	14	17	21
112583	chr11	34376256	34385647	ABTB2	chr11	33862782	33867655	34	17	15	22
112583	chr11	34376256	34385647	ABTB2	chr11	34198534	34203608	109	96	66	90.3333
112583	chr11	34376256	34385647	ABTB2	chr11	34372529	34374832	388	292	195	291.667
280782	chr17	9972695	9976981	AC000003.1	chr17	9978733	9989981	520	300	276	365.333
432240	chr22	29869289	29877404	AC000035.3	chr22	29865245	29868297	177	121	137	145
698469	chr7	126848723	126855584	AC000099.1	chr7	126843445	126862996	451	154	169	258
695317	chr7	117203158	117205915	AC000111.3	chr7	117206606	117211196	268	88	81	145.667
695349	chr7	117286445	117296105	AC000111.6	chr7	117280198	117283514	148	50	50	82.6667
698507	chr7	126990132	126991379	AC000123.4	chr7	126995294	127002199	282	220	295	265.667
698178	chr7	126018517	126019314	AC000370.2	chr7	126019574	126019789	634	307	270	403.667
687229	chr7	89899258	89899670	AC002064.4	chr7	89894613	89897552	414	338	162	304.667
177557	chr12	120017868	120022164	AC002070.1	chr12	120023095	120030686	250	77	84	137
688395	chr7	93518811	93526004	AC002076.10	chr7	93516907	93528212	279	88	94	153.667
688395	chr7	93518811	93526004	AC002076.10	chr7	94030562	94036742	16	9	13	12.6667
688395	chr7	93518811	93526004	AC002076.10	chr7	94258624	94274717	3	3	4	3.33333
327690	chr19	36163037	36165455	AC002115.7	chr19	36177426	36183560	68	41	29	46
265933	chr16	30583431	30599062	AC002310.7	chr16	30603111	30606537	167	89	87	114.333
265135	chr16	26655086	26667187	AC002331.1	chr16	26670393	26670939	205	41	46	97.3333
787483	chrX	9935188	9945849	AC002365.1	chrX	9949758	9950242	56	40	33	43
828153	chrX	147579628	147584803	AC002368.4	chrX	147586040	147587569	205	90	59	118
688808	chr7	94843257	94846649	AC002429.5	chr7	94832589	94842106	327	98	125	183.333
688041	chr7	92460612	92467461	AC002454.1	chr7	92468125	92471907	152	71	60	94.3333
688041	chr7	92460612	92467461	AC002454.1	chr7	92849757	92868588	12	5	5	7.33333
687340	chr7	90224880	90229044	AC002456.2	chr7	89965170	89981752	24	8	4	12
687340	chr7	90224880	90229044	AC002456.2	chr7	90222605	90223075	517	302	280	366.333
695228	chr7	116938738	116942637	AC002465.2	chr7	116932236	116947596	172	177	148	165.667
430334	chr22	21354010	21359615	AC002472.9	chr22	21337491	21340295	89	106	72	89
629404	chr6	67067857	67072058	AC002485.1	chr6	67059430	67062000	158	52	66	92
327641	chr19	35903842	35921173	AC002511.2	chr19	35922293	35923941	421	236	283	313.333
327644	chr19	35923942	35924938	AC002511.3	chr19	35929273	35930505	247	323	230	266.667
294839	chr17	68117083	68127423	AC002539.1	chr17	67569080	67572238	20	9	6	11.6667
294839	chr17	68117083	68127423	AC002539.1	chr17	68114103	68128814	187	58	89	111.333
282513	chr17	15942879	15950350	AC002553.1	chr17	15941023	15941565	574	259	283	372
175411	chr12	111505356	111513903	AC002978.1	chr12	111497931	111501966	422	249	262	311
175469	chr12	111723835	111753943	AC002979.1	chr12	111722246	111722424	338	210	187	245
331732	chr19	57874301	57876210	AC003002.1	chr19	58081825	58092190	16	15	31	20.6667
288027	chr17	42390257	42397409	AC003043.2	chr17	42388727	42389670	178	185	139	167.333
693438	chr7	111446838	111456213	AC003077.1	chr7	111456846	111458915	705	133	209	349
693438	chr7	111446838	111456213	AC003077.1	chr7	112377815	112383400	10	4	5	6.33333
288017	chr17	42313834	42330958	AC003102.1	chr17	42349489	42351537	34	28	20	27.3333
789043	chrX	14781673	14783307	AC003658.1	chrX	14777744	14786672	139	56	55	83.3333
288831	chr17	46017787	46020845	AC003665.1	chr17	46010762	46029316	142	106	83	110.333
288831	chr17	46017787	46020845	AC003665.1	chr17	46660464	46670496	13	7	3	7.66667
787561	chrX	10183841	10190318	AC003666.1	chrX	10181451	10183187	288	214	119	207
331781	chr19	58070618	58071857	AC003682.1	chr19	58077186	58081824	295	259	246	266.667
287465	chr17	39556895	39559653	AC003958.2	chr17	39561754	39564783	290	205	127	207.333
667078	chr7	19149889	19152619	AC003986.6	chr7	19153816	19154063	694	296	267	419
693519	chr7	111705301	111713189	AC004001.1	chr7	111688218	111700208	109	32	44	61.6667
668903	chr7	24940241	24944765	AC004016.1	chr7	24946896	24950375	144	111	118	124.333
331816	chr19	58201503	58211052	AC004017.1	chr19	58190264	58191037	127	60	55	80.6667
596408	chr5	131995259	132002938	AC004041.2	chr5	132010405	132013729	62	52	24	46
523546	chr4	92022003	92034865	AC004054.1	chr4	92035384	92039794	238	28	51	105.667
528211	chr4	106470817	106473904	AC004066.3	chr4	106464467	106481293	322	155	165	214
528211	chr4	106470817	106473904	AC004066.3	chr4	106923254	106939570	5	3	4	4
528089	chr4	106098019	106101391	AC004069.3	chr4	106106436	106107953	210	114	115	146.333
669601	chr7	27143269	27156411	AC004080.12	chr7	25904066	25913876	26	11	7	14.6667
669601	chr7	27143269	27156411	AC004080.12	chr7	27158218	27164725	566	112	147	275
664555	chr7	11446419	11448376	AC004160.4	chr7	11451669	11454552	347	169	161	225.667
664555	chr7	11446419	11448376	AC004160.4	chr7	12116732	12120383	15	4	6	8.33333
285994	chr17	33327263	33339463	AC004223.1	chr17	33340076	33350597	99	41	36	58.6667
287335	chr17	39072966	39081007	AC004231.2	chr17	38807922	38811001	11	5	6	7.33333
287335	chr17	39072966	39081007	AC004231.2	chr17	39085476	39088471	394	172	145	237
287335	chr17	39072966	39081007	AC004231.2	chr17	39475430	39485945	54	20	30	34.6667
596414	chr5	132021077	132026796	AC004237.1	chr5	132013730	132020752	451	198	128	259
695362	chr7	117326533	117332208	AC004240.2	chr7	117336768	117337956	570	184	199	317.667
263590	chr16	20809499	20832372	AC004381.6	chr16	20834034	20838377	347	119	129	198.333
263590	chr16	20809499	20832372	AC004381.6	chr16	21092789	21098076	59	14	23	32
689210	chr7	96097482	96097899	AC004458.1	chr7	96092458	96105818	342	281	240	287.667
668717	chr7	24292338	24302526	AC004485.3	chr7	24291367	24291641	35	16	14	21.6667
691985	chr7	106932849	106935805	AC004492.1	chr7	106926342	106943819	107	29	39	58.3333
669365	chr7	26414940	26426318	AC004540.4	chr7	25918726	25936200	35	21	19	25
669365	chr7	26414940	26426318	AC004540.4	chr7	26117010	26130995	37	21	15	24.3333
669365	chr7	26414940	26426318	AC004540.4	chr7	26531795	26545001	50	30	20	33.3333
669365	chr7	26414940	26426318	AC004540.4	chr7	27203006	27207966	35	22	18	25
670274	chr7	29244468	29248959	AC004593.3	chr7	28205981	28214269	7	3	3	4.33333
670274	chr7	29244468	29248959	AC004593.3	chr7	29251944	29267594	192	157	113	154
791573	chrX	23138197	23142068	AC004673.1	chrX	23130919	23149885	164	48	50	87.3333
670744	chr7	30839356	30845759	AC004691.5	chr7	30835243	30839327	238	138	100	158.667
670744	chr7	30839356	30845759	AC004691.5	chr7	31156368	31162912	13	10	5	9.33333
674504	chr7	43285149	43293141	AC004692.4	chr7	42994150	42997047	27	13	11	17
674504	chr7	43285149	43293141	AC004692.4	chr7	43282105	43282592	610	265	262	379
667002	chr7	18936264	18939440	AC004744.3	chr7	18925423	18945019	151	97	109	119
689476	chr7	96919479	96921456	AC004745.1	chr7	96915012	96917744	380	215	204	266.333
322833	chr19	16122752	16134790	AC004790.1	chr19	16115279	16121309	64	26	13	34.3333
673397	chr7	39649880	39651654	AC004837.4	chr7	39655239	39655868	332	162	119	204.333
696566	chr7	121209377	121214902	AC004875.1	chr7	121220193	121221430	103	43	29	58.3333
689902	chr7	98610216	98611812	AC004893.11	chr7	98614331	98615491	587	336	237	386.667
689902	chr7	98610216	98611812	AC004893.11	chr7	98903613	98907146	52	39	20	37
662253	chr7	2981215	2986553	AC004906.3	chr7	1952459	1964546	6	4	5	5
662253	chr7	2981215	2986553	AC004906.3	chr7	2986624	2993630	393	168	129	230
662253	chr7	2981215	2986553	AC004906.3	chr7	3946616	3952183	6	7	3	5.33333
704797	chr7	149095265	149099206	AC004941.3	chr7	148176135	148184574	3	3	3	3
704797	chr7	149095265	149099206	AC004941.3	chr7	149091892	149092902	591	216	304	370.333
687191	chr7	89797750	89805367	AC004969.1	chr7	89806288	89807456	74	29	28	43.6667
687191	chr7	89797750	89805367	AC004969.1	chr7	90041979	90053319	21	9	10	13.3333
673664	chr7	40585156	40594948	AC004988.1	chr7	40279429	40297097	13	8	8	9.66667
673664	chr7	40585156	40594948	AC004988.1	chr7	40582390	40584286	162	89	53	101.333
684306	chr7	80802658	80808518	AC005008.2	chr7	80809267	80809939	205	89	86	126.667
686128	chr7	86404114	86410019	AC005009.1	chr7	86033423	86044648	7	4	3	4.66667
686128	chr7	86404114	86410019	AC005009.1	chr7	86400291	86418805	287	76	96	153
669962	chr7	28214270	28220875	AC005017.1	chr7	27382418	27384607	10	3	5	6
669962	chr7	28214270	28220875	AC005017.1	chr7	28205981	28222550	1018	194	164	458.667
669962	chr7	28214270	28220875	AC005017.1	chr7	28713709	28725725	20	10	8	12.6667
674039	chr7	41727444	41736387	AC005027.4	chr7	41042854	41048251	33	28	9	23.3333
674039	chr7	41727444	41736387	AC005027.4	chr7	41726681	41739703	207	127	252	195.333
360641	chr2	102507522	102509732	AC005035.1	chr2	102513197	102516654	728	394	287	469.667
360641	chr2	102507522	102509732	AC005035.1	chr2	102853361	102859433	60	38	30	42.6667
391582	chr2	201697328	201710181	AC005037.1	chr2	201710315	201713767	287	132	80	166.333
391582	chr2	201697328	201710181	AC005037.1	chr2	202497160	202515335	6	5	6	5.66667
391613	chr2	201822381	201832549	AC005037.3	chr2	201818539	201819235	422	165	148	245
391613	chr2	201822381	201832549	AC005037.3	chr2	202502676	202513088	15	7	3	8.33333
353933	chr2	74724092	74730955	AC005041.17	chr2	74719652	74737234	103	135	93	110.333
378112	chr2	159589994	159594240	AC005042.4	chr2	158879904	158892592	34	5	16	18.3333
378112	chr2	159589994	159594240	AC005042.4	chr2	159111682	159113848	15	5	12	10.6667
378112	chr2	159589994	159594240	AC005042.4	chr2	159585537	159588987	541	196	130	289
692212	chr7	107675249	107677856	AC005048.1	chr7	107678997	107682243	374	132	138	214.667
690221	chr7	99945535	99957189	AC005071.2	chr7	99958147	99968909	83	109	181	124.333
668396	chr7	23205292	23213193	AC005082.1	chr7	23198525	23204964	157	96	44	99
403284	chr2	242289894	242306608	AC005104.3	chr2	242282948	242287044	256	125	101	160.667
670673	chr7	30621402	30628695	AC005154.5	chr7	30619961	30632311	113	23	48	61.3333
684686	chr7	81916023	81922657	AC005159.1	chr7	81909937	81927693	285	54	84	141
693166	chr7	110567690	110568858	AC005161.1	chr7	110561195	110562126	357	145	171	224.333
693166	chr7	110567690	110568858	AC005161.1	chr7	111029152	111033204	6	6	4	5.33333
670204	chr7	29039930	29041158	AC005162.3	chr7	29037628	29039773	231	119	114	154.667
670230	chr7	29118306	29127727	AC005162.4	chr7	29130041	29131438	355	138	140	211
670196	chr7	29021999	29027595	AC005162.5	chr7	29016830	29033111	152	109	109	123.333
670196	chr7	29021999	29027595	AC005162.5	chr7	29431931	29446383	18	10	9	12.3333
529821	chr4	111219390	111231594	AC005187.1	chr4	111428734	111435498	25	12	24	20.3333
281994	chr17	14112611	14117729	AC005224.2	chr17	14118876	14129891	213	72	34	106.333
281994	chr17	14112611	14117729	AC005224.2	chr17	14825816	14832093	22	9	7	12.6667
403228	chr2	241993388	242007843	AC005237.4	chr2	242010377	242019992	71	15	18	34.6667
226887	chr14	73906576	73921687	AC005280.2	chr14	73925446	73925698	285	151	164	200
281003	chr17	10956285	10958706	AC005284.1	chr17	10961021	10968663	388	150	159	232.333
280888	chr17	10436767	10461060	AC005323.1	chr17	10465577	10466777	132	39	40	70.3333
281492	chr17	12607530	12615124	AC005358.3	chr17	12616657	12625941	196	228	76	166.667
599092	chr5	142028309	142037056	AC005370.1	chr5	142045380	142048141	157	62	92	103.667
599092	chr5	142028309	142037056	AC005370.1	chr5	142266489	142270614	53	27	21	33.6667
599092	chr5	142028309	142037056	AC005370.1	chr5	143197911	143214081	15	7	6	9.33333
706942	chr7	157394807	157419983	AC005481.5	chr7	157389897	157393732	235	148	94	159
673330	chr7	39443814	39453173	AC005483.3	chr7	39441846	39442970	268	79	93	146.667
322380	chr19	13472343	13487123	AC005513.1	chr19	13461416	13467307	154	80	63	99
706699	chr7	156449637	156452943	AC005534.8	chr7	156445416	156447494	172	87	76	111.667
706699	chr7	156449637	156452943	AC005534.8	chr7	157054736	157068596	4	4	2	3.33333
706703	chr7	156467718	156471115	AC005534.9	chr7	156471235	156475067	394	169	165	242.667
401510	chr2	234863824	234864689	AC005538.5	chr2	234852749	234862763	349	110	120	193
293990	chr17	65017447	65035836	AC005544.1	chr17	65045184	65049456	190	103	88	127
281025	chr17	11030374	11041661	AC005548.2	chr17	11042198	11048380	148	53	83	94.6667
665944	chr7	15705934	15710548	AC005550.3	chr7	15718688	15719039	228	88	91	135.667
328764	chr19	42067130	42072031	AC005626.1	chr19	42058065	42065467	431	375	297	367.667
281060	chr17	11169777	11171608	AC005725.1	chr17	11163438	11167899	660	351	318	443
598917	chr5	141358041	141365080	AC005740.5	chr5	141365551	141368249	48	57	26	43.6667
598917	chr5	141358041	141365080	AC005740.5	chr5	141519259	141525570	29	13	12	18
598689	chr5	140532451	140539223	AC005754.1	chr5	140541107	140546580	188	38	43	89.6667
142508	chr12	2946158	2967420	AC005841.1	chr12	2972101	2983852	316	146	93	185
282158	chr17	14678861	14683932	AC005863.1	chr17	13491044	13498956	12	6	3	7
793794	chrX	30332281	30337512	AC005926.1	chrX	30323047	30324292	42	34	23	33
282571	chr17	16219732	16239233	AC005971.3	chr17	16216449	16217227	331	141	111	194.333
666076	chr7	16128615	16132568	AC006035.2	chr7	16120059	16137647	290	60	85	145
666076	chr7	16128615	16132568	AC006035.2	chr7	16595430	16611657	16	4	6	8.66667
663468	chr7	8153167	8156322	AC006042.6	chr7	7070634	7082553	6	4	8	6
663468	chr7	8153167	8156322	AC006042.6	chr7	8157100	8161813	479	263	200	314
684583	chr7	81638222	81640005	AC006145.4	chr7	81640313	81643395	153	41	54	82.6667
694986	chr7	116210079	116213191	AC006159.4	chr7	115892265	115897797	43	18	17	26
694986	chr7	116210079	116213191	AC006159.4	chr7	116201521	116204180	438	157	153	249.333
694986	chr7	116210079	116213191	AC006159.4	chr7	116428490	116433148	38	17	16	23.6667
694980	chr7	116182823	116192788	AC006159.5	chr7	116195909	116200733	507	150	201	286
500997	chr4	17608919	17616354	AC006160.5	chr4	17606084	17607429	358	189	152	233
500997	chr4	17608919	17616354	AC006160.5	chr4	17813639	17814594	48	29	28	35
321691	chr19	9343318	9353405	AC006271.2	chr19	9356576	9357119	227	74	82	127.667
320784	chr19	2906665	2917330	AC006277.2	chr19	2923283	2934464	359	149	145	217.667
313206	chr18	53858306	53862432	AC006305.1	chr18	53849710	53856574	202	54	84	113.333
685217	chr7	83545597	83552907	AC006322.1	chr7	83544634	83559573	327	100	143	190
685217	chr7	83545597	83552907	AC006322.1	chr7	84659724	84660491	48	18	24	30
342797	chr2	37826702	37832022	AC006369.2	chr2	37836441	37840247	257	112	99	156
342797	chr2	37826702	37832022	AC006369.2	chr2	38036345	38055538	51	19	21	30.3333
706921	chr7	157310478	157323885	AC006372.1	chr7	157323968	157342852	419	93	72	194.667
706921	chr7	157310478	157323885	AC006372.1	chr7	157692683	157704887	16	17	14	15.6667
706918	chr7	157303401	157307949	AC006372.6	chr7	157307969	157310477	163	94	85	114
671038	chr7	31830858	31834729	AC006377.1	chr7	31481087	31482761	22	15	13	16.6667
671038	chr7	31830858	31834729	AC006377.1	chr7	31835004	31848588	819	179	215	404.333
671038	chr7	31830858	31834729	AC006377.1	chr7	32377649	32383103	13	7	4	8
671038	chr7	31830858	31834729	AC006377.1	chr7	32511008	32527617	9	4	13	8.66667
688428	chr7	93596333	93601243	AC006378.2	chr7	93592071	93595053	249	101	102	150.667
670911	chr7	31353919	31359988	AC006380.1	chr7	31348182	31353216	244	96	109	149.667
279153	chr17	2314092	2319703	AC006435.1	chr17	1965344	1970162	25	13	16	18
279153	chr17	2314092	2319703	AC006435.1	chr17	2305925	2307732	731	528	440	566.333
702188	chr7	140273589	140281339	AC006452.1	chr7	140285197	140295274	179	69	77	108.333
388350	chr2	191569644	191574683	AC006460.2	chr2	191576504	191580579	376	145	127	216
663326	chr7	7670628	7680978	AC006465.3	chr7	7219554	7229853	5	6	10	7
663326	chr7	7670628	7680978	AC006465.3	chr7	7682482	7683035	158	91	107	118.667
663326	chr7	7670628	7680978	AC006465.3	chr7	8002662	8007421	10	7	7	8
147973	chr12	21560223	21566894	AC006559.1	chr12	21551599	21559430	161	122	51	111.333
672450	chr7	36501010	36504170	AC006960.7	chr7	36493783	36496061	261	81	96	146
672450	chr7	36501010	36504170	AC006960.7	chr7	37225132	37241195	28	11	19	19.3333
686711	chr7	88269219	88272948	AC006988.1	chr7	88264809	88268110	348	97	91	178.667
667428	chr7	20171189	20182032	AC007001.4	chr7	20183873	20187163	446	81	129	218.667
667428	chr7	20171189	20182032	AC007001.4	chr7	20635144	20639529	13	6	5	8
394370	chr2	210893932	210895712	AC007038.7	chr2	210886099	210886566	249	100	139	162.667
352998	chr2	71215399	71238800	AC007040.6	chr2	71206828	71210054	22	20	9	17
352987	chr2	71171022	71181375	AC007040.7	chr2	70539928	70546324	14	10	9	11
352987	chr2	71171022	71181375	AC007040.7	chr2	71012311	71017213	68	23	39	43.3333
352987	chr2	71171022	71181375	AC007040.7	chr2	71168992	71169598	840	283	356	493
430243	chr22	20874573	20891767	AC007050.17	chr22	20866800	20872761	396	172	216	261.333
228118	chr14	78856357	78870336	AC007056.1	chr14	78873507	78873672	70	30	25	41.6667
670231	chr7	29127728	29130040	AC007096.1	chr7	29131439	29134984	327	154	130	203.667
350586	chr2	63083481	63093347	AC007098.1	chr2	63080209	63094401	18	11	10	13
354213	chr2	75699717	75702099	AC007099.2	chr2	75693658	75696000	286	110	133	176.333
349523	chr2	59467626	59474178	AC007131.1	chr2	59462352	59465893	334	133	156	207.667
349549	chr2	59548855	59555328	AC007131.2	chr2	59533606	59548758	152	52	50	84.6667
227428	chr14	76041807	76048096	AC007182.1	chr14	76035473	76038270	189	115	86	130
391864	chr2	202703438	202707658	AC007242.1	chr2	202702583	202703130	639	216	239	364.667
391864	chr2	202703438	202707658	AC007242.1	chr2	203028395	203038388	40	18	24	27.3333
360745	chr2	102796770	102798587	AC007271.3	chr2	102501909	102513196	50	21	27	32.6667
360745	chr2	102796770	102798587	AC007271.3	chr2	102624888	102642523	96	57	35	62.6667
360745	chr2	102796770	102798587	AC007271.3	chr2	102789465	102790458	468	230	210	302.667
360745	chr2	102796770	102798587	AC007271.3	chr2	103038722	103055984	35	27	20	27.3333
670505	chr7	30020860	30031878	AC007285.6	chr7	30017237	30020819	435	156	213	268
670528	chr7	30114142	30117439	AC007285.7	chr7	30118283	30121159	473	134	92	233
430286	chr22	21074475	21084073	AC007308.1	chr22	21100825	21112280	131	68	48	82.3333
672378	chr7	36267377	36276565	AC007327.5	chr7	36263238	36263783	18	10	11	13
268707	chr16	52281792	52289815	AC007333.1	chr16	52291954	52298360	644	81	152	292.333
268010	chr16	49689083	49714490	AC007339.1	chr16	49686792	49687357	193	87	83	121
672551	chr7	36873585	36884968	AC007349.7	chr7	36889970	36891582	200	60	44	101.333
391895	chr2	202817838	202818898	AC007358.1	chr2	202811155	202824848	336	190	146	224
393006	chr2	206624678	206641859	AC007362.3	chr2	205727104	205746205	8	2	4	4.66667
393006	chr2	206624678	206641859	AC007362.3	chr2	206618306	206622607	499	131	166	265.333
351209	chr2	65002925	65007574	AC007365.1	chr2	65010613	65019370	695	262	212	389.667
351277	chr2	65272002	65280740	AC007386.4	chr2	65284640	65290383	304	124	148	192
342660	chr2	37421923	37427666	AC007390.5	chr2	37421134	37439286	139	82	71	97.3333
342749	chr2	37672593	37690496	AC007391.1	chr2	37665578	37670628	59	20	18	32.3333
352920	chr2	70907748	70915617	AC007395.3	chr2	70915626	70921925	107	26	22	51.6667
342452	chr2	36770420	36781752	AC007401.2	chr2	36589065	36595533	25	15	13	17.6667
342452	chr2	36770420	36781752	AC007401.2	chr2	36763311	36763815	143	70	101	104.667
346965	chr2	51657421	51664215	AC007402.1	chr2	51651924	51655991	356	103	138	199
381994	chr2	171568282	171575554	AC007405.2	chr2	171248089	171263295	11	5	10	8.66667
382013	chr2	171638259	171641967	AC007405.7	chr2	171246094	171257838	46	13	18	25.6667
382013	chr2	171638259	171641967	AC007405.7	chr2	171635584	171647390	879	222	365	488.667
291621	chr17	55808976	55828271	AC007431.1	chr17	55210433	55222836	22	10	16	16
144113	chr12	9279208	9287943	AC007436.1	chr12	9273212	9273654	148	56	74	92.6667
144937	chr12	11694590	11696292	AC007450.1	chr12	11692659	11698794	177	143	131	150.333
144937	chr12	11694590	11696292	AC007450.1	chr12	12182210	12197373	24	6	21	17
144937	chr12	11694590	11696292	AC007450.1	chr12	12469060	12478444	12	5	6	7.66667
820002	chrX	120460099	120468608	AC007486.1	chrX	120456560	120456765	78	22	50	50
145537	chr12	13739260	13744348	AC007535.1	chr12	13733373	13735739	352	154	154	220
672280	chr7	35878511	35889686	AC007551.1	chr7	35866857	35877125	116	24	33	57.6667
381490	chr2	169956259	169964906	AC007556.3	chr2	169825571	169843047	92	25	45	54
381490	chr2	169956259	169964906	AC007556.3	chr2	169952750	169969000	387	132	196	238.333
396621	chr2	217713111	217719878	AC007557.4	chr2	218342829	218349036	15	7	6	9.33333
261359	chr16	12180269	12184172	AC007601.1	chr16	12185147	12202393	277	129	68	158
261359	chr16	12180269	12184172	AC007601.1	chr16	12990464	13005584	4	5	4	4.33333
261359	chr16	12180269	12184172	AC007601.1	chr16	13539223	13553754	12	10	8	10
268224	chr16	50645927	50648567	AC007608.1	chr16	49895836	49911558	7	6	5	6
268224	chr16	50645927	50648567	AC007608.1	chr16	50031301	50048927	18	8	10	12
268224	chr16	50645927	50648567	AC007608.1	chr16	50650427	50660820	821	257	520	532.667
490951	chr3	179112683	179117920	AC007620.3	chr3	179111203	179120922	316	126	135	192.333
490951	chr3	179112683	179117920	AC007620.3	chr3	179288215	179298803	19	15	20	18
145190	chr12	12507457	12515147	AC007621.1	chr12	12515342	12520055	229	178	103	170
145190	chr12	12507457	12515147	AC007621.1	chr12	12854369	12864725	89	26	42	52.3333
393060	chr2	206849773	206862955	AC007679.3	chr2	206867008	206867378	370	77	144	197
346801	chr2	51166414	51173621	AC007682.1	chr2	51176892	51181845	361	92	184	212.333
346808	chr2	51185620	51189733	AC007682.2	chr2	51182667	51185408	218	75	56	116.333
379438	chr2	163623892	163626890	AC007740.1	chr2	163621172	163629477	242	85	92	139.667
379236	chr2	163013915	163023237	AC007750.5	chr2	162435315	162453162	21	3	4	9.33333
379236	chr2	163013915	163023237	AC007750.5	chr2	163025085	163027608	682	160	179	340.333
294312	chr17	66382529	66387178	AC007780.1	chr17	66376040	66379684	38	45	44	42.3333
175153	chr12	110205640	110213215	AC007834.3	chr12	109959607	109962510	31	34	22	29
175153	chr12	110205640	110213215	AC007834.3	chr12	110214440	110219563	184	156	125	155
227188	chr14	75179298	75195674	AC007956.1	chr14	74952676	74957567	17	7	14	12.6667
227188	chr14	75179298	75195674	AC007956.1	chr14	75162179	75177266	186	145	74	135
227188	chr14	75179298	75195674	AC007956.1	chr14	76116080	76132469	7	6	6	6.33333
700011	chr7	132714971	132721968	AC008038.1	chr7	132724011	132726967	617	158	187	320.667
228191	chr14	79082516	79084562	AC008045.1	chr14	79085815	79089175	408	112	133	217.667
706367	chr7	155301716	155306664	AC008060.5	chr7	155295511	155298597	386	111	106	201
706333	chr7	155173835	155182619	AC008060.7	chr7	154713714	154718901	30	9	9	16
706333	chr7	155173835	155182619	AC008060.7	chr7	154977818	154985167	12	18	12	14
706350	chr7	155247684	155262051	AC008060.8	chr7	154713714	154729408	8	10	10	9.33333
706350	chr7	155247684	155262051	AC008060.8	chr7	155554071	155563953	18	15	13	15.3333
379207	chr2	162928826	162933700	AC008063.2	chr2	162926209	162927831	383	184	148	238.333
355847	chr2	80843106	80846853	AC008067.2	chr2	80847184	80861808	120	52	57	76.3333
336791	chr2	17022736	17028169	AC008069.1	chr2	17030636	17034350	571	217	206	331.333
336791	chr2	17022736	17028169	AC008069.1	chr2	17481624	17493199	10	7	12	9.66667
336791	chr2	17022736	17028169	AC008069.1	chr2	18030180	18048566	6	5	3	4.66667
336794	chr2	17034351	17039791	AC008069.2	chr2	17028170	17042143	241	150	207	199.333
336794	chr2	17034351	17039791	AC008069.2	chr2	17482089	17500918	6	2	3	3.66667
338984	chr2	24295863	24302128	AC008073.5	chr2	24281136	24290674	502	284	153	313
338984	chr2	24295863	24302128	AC008073.5	chr2	25183362	25199840	10	6	5	7
339005	chr2	24396269	24400364	AC008073.7	chr2	24390476	24406101	140	45	63	82.6667
339014	chr2	24423614	24425787	AC008073.9	chr2	24429056	24438066	429	108	130	222.333
351094	chr2	64676041	64685208	AC008074.3	chr2	64686077	64686696	448	184	171	267.667
351094	chr2	64676041	64685208	AC008074.3	chr2	65421304	65421945	11	5	5	7
699676	chr7	131536573	131538666	AC008085.1	chr7	131543535	131544640	564	262	289	371.667
700407	chr7	134070085	134076097	AC008154.1	chr7	134067735	134068521	83	32	31	48.6667
700378	chr7	133968001	133984111	AC008154.4	chr7	132753965	132772530	6	3	5	4.66667
700378	chr7	133968001	133984111	AC008154.4	chr7	132931721	132945811	12	3	6	7
700378	chr7	133968001	133984111	AC008154.4	chr7	133986185	133994419	458	101	192	250.333
386782	chr2	186664132	186666379	AC008174.3	chr2	186658945	186660145	736	261	340	445.667
336458	chr2	15828658	15834232	AC008271.1	chr2	15822467	15824624	187	69	66	107.333
378308	chr2	160242682	160244321	AC008277.1	chr2	160237369	160241718	554	143	167	288
336419	chr2	15701485	15705850	AC008278.2	chr2	15696011	15712784	209	131	93	144.333
336419	chr2	15701485	15705850	AC008278.2	chr2	16140514	16147177	8	6	5	6.33333
336454	chr2	15818632	15822432	AC008278.3	chr2	15822467	15828657	48	14	8	23.3333
581851	chr5	86534776	86538784	AC008394.1	chr5	86531968	86533544	602	183	231	338.667
602869	chr5	154402015	154408382	AC008410.1	chr5	154417189	154418532	94	40	44	59.3333
331084	chr19	54373773	54391658	AC008440.5	chr19	54394837	54398205	333	208	195	245.333
327527	chr19	35321278	35324100	AC008555.3	chr19	35314280	35315393	377	231	175	261
578666	chr5	76431806	76434805	AC008581.1	chr5	76423684	76441296	452	117	110	226.333
578666	chr5	76431806	76434805	AC008581.1	chr5	76725726	76729674	19	13	14	15.3333
584649	chr5	95187970	95189230	AC008592.4	chr5	94990784	95000142	63	18	24	35
584649	chr5	95187970	95189230	AC008592.4	chr5	95474447	95481201	29	8	11	16
584649	chr5	95187970	95189230	AC008592.4	chr5	95670825	95678707	38	24	27	29.6667
584649	chr5	95187970	95189230	AC008592.4	chr5	95936498	95948908	24	21	7	17.3333
584651	chr5	95191249	95198706	AC008592.5	chr5	94990784	94997997	47	18	16	27
584651	chr5	95191249	95198706	AC008592.5	chr5	95200214	95202958	239	123	107	156.333
584651	chr5	95191249	95198706	AC008592.5	chr5	95479427	95486553	25	11	11	15.6667
584651	chr5	95191249	95198706	AC008592.5	chr5	95670825	95676676	45	35	20	33.3333
584651	chr5	95191249	95198706	AC008592.5	chr5	95939121	95948908	31	4	5	13.3333
728702	chr8	74183162	74188264	AC008598.1	chr8	74175965	74191726	579	60	188	275.667
728702	chr8	74183162	74188264	AC008598.1	chr8	75238791	75251558	5	6	4	5
608237	chr5	171703461	171707150	AC008671.1	chr5	171699731	171715668	35	22	14	23.6667
603608	chr5	156800655	156804320	AC008676.1	chr5	156807857	156809004	375	151	173	233
331168	chr19	54935995	54949473	AC008746.3	chr19	54950627	54955080	227	112	62	133.667
598817	chr5	140997436	141001348	AC008781.7	chr5	141326989	141334174	8	16	5	9.66667
567729	chr5	40793690	40802064	AC008810.1	chr5	39573315	39581964	26	10	8	14.6667
567729	chr5	40793690	40802064	AC008810.1	chr5	39711447	39712988	15	4	10	9.66667
567729	chr5	40793690	40802064	AC008810.1	chr5	40777574	40782055	97	44	57	66
573787	chr5	60850090	60854961	AC008836.1	chr5	60358458	60373589	20	5	11	12
573787	chr5	60850090	60854961	AC008836.1	chr5	60859915	60861966	444	153	216	271
566699	chr5	37801580	37802300	AC008869.1	chr5	37792669	37808569	427	172	219	272.667
572230	chr5	56154298	56165554	AC008937.2	chr5	55254253	55264254	44	9	19	24
572230	chr5	56154298	56165554	AC008937.2	chr5	55560746	55567802	99	24	47	56.6667
572230	chr5	56154298	56165554	AC008937.2	chr5	55848527	55855534	52	12	13	25.6667
564950	chr5	32378290	32379816	AC008949.1	chr5	32383552	32384456	215	97	89	133.667
564950	chr5	32378290	32379816	AC008949.1	chr5	32608363	32612692	47	17	7	23.6667
597206	chr5	135048409	135058021	AC009009.1	chr5	135058378	135058803	177	96	88	120.333
258956	chr16	1029620	1036012	AC009041.2	chr16	1036134	1038654	206	185	132	174.333
259121	chr16	2308285	2320357	AC009065.2	chr16	2534250	2551717	13	13	7	11
273164	chr16	67647068	67654519	AC009095.4	chr16	67640599	67642960	445	208	198	283.667
261222	chr16	11428923	11444698	AC009121.1	chr16	11047331	11055793	49	28	24	33.6667
261222	chr16	11428923	11444698	AC009121.1	chr16	11447315	11452430	621	274	285	393.333
277591	chr16	84225815	84257830	AC009123.1	chr16	84261133	84265346	26	20	14	20
265790	chr16	29819843	29830118	AC009133.1	chr16	29813192	29815641	20	36	17	24.3333
277403	chr16	83434090	83438391	AC009142.1	chr16	83438856	83442832	210	104	107	140.333
276333	chr16	79702029	79710780	AC009159.1	chr16	79698064	79712033	399	146	124	223
393473	chr2	208174591	208175887	AC009226.1	chr2	207661375	207665273	10	27	17	18
393473	chr2	208174591	208175887	AC009226.1	chr2	208020122	208021671	55	61	51	55.6667
376766	chr2	155308983	155314644	AC009227.2	chr2	155304405	155306576	621	218	272	370.333
346725	chr2	50922472	50929597	AC009234.1	chr2	50914400	50933196	346	84	83	171
378964	chr2	162199599	162208201	AC009299.1	chr2	162208323	162216639	226	101	73	133.333
378936	chr2	162108416	162118044	AC009299.2	chr2	162094370	162100079	151	44	84	93
365459	chr2	118749134	118755558	AC009303.1	chr2	118580233	118586224	57	32	41	43.3333
365459	chr2	118749134	118755558	AC009303.1	chr2	118760970	118761949	383	209	209	267
365390	chr2	118555596	118563122	AC009312.1	chr2	118544882	118548592	122	58	48	76
378896	chr2	162013468	162020247	AC009313.1	chr2	161232739	161238597	14	6	11	10.3333
378896	chr2	162013468	162020247	AC009313.1	chr2	162010570	162021227	261	145	106	170.667
699924	chr7	132443212	132448012	AC009365.4	chr7	132434530	132454485	203	186	112	167
699924	chr7	132443212	132448012	AC009365.4	chr7	133079558	133099058	8	6	3	5.66667
663414	chr7	7986211	7991370	AC009473.1	chr7	7981773	7983420	343	102	127	190.667
381369	chr2	169641295	169644449	AC009475.2	chr2	169180270	169193319	7	8	12	9
381369	chr2	169641295	169644449	AC009475.2	chr2	169632134	169637874	325	126	158	203
374592	chr2	148659912	148660536	AC009480.3	chr2	147828838	147844043	56	23	37	38.6667
374592	chr2	148659912	148660536	AC009480.3	chr2	148656715	148658992	697	248	214	386.333
378991	chr2	162278434	162285226	AC009487.4	chr2	162275757	162275944	409	197	191	265.667
350652	chr2	63274196	63276073	AC009501.4	chr2	63268692	63270099	519	186	228	311
350652	chr2	63274196	63276073	AC009501.4	chr2	64069760	64071593	5	6	4	5
361840	chr2	106471337	106474382	AC009505.2	chr2	106464296	106468950	338	285	253	292
378381	chr2	160470703	160474295	AC009506.1	chr2	160465629	160470350	318	67	157	180.667
699951	chr7	132514929	132517014	AC009518.8	chr7	132510702	132522960	518	231	330	359.667
700651	chr7	134878946	134885205	AC009542.2	chr7	134326105	134344199	16	9	19	14.6667
700651	chr7	134878946	134885205	AC009542.2	chr7	134688043	134690985	44	25	18	29
700651	chr7	134878946	134885205	AC009542.2	chr7	134885224	134887003	679	328	330	445.667
249922	chr15	70017141	70023265	AC009677.1	chr15	70547417	70554336	21	15	12	16
249922	chr15	70017141	70023265	AC009677.1	chr15	70775928	70785713	28	15	20	21
249922	chr15	70017141	70023265	AC009677.1	chr15	71047195	71058573	7	4	3	4.66667
700958	chr7	135926229	135930509	AC009784.1	chr7	135921974	135925042	481	183	166	276.667
305802	chr18	30104299	30111824	AC009835.1	chr18	29743984	29756578	15	11	8	11.3333
305802	chr18	30104299	30111824	AC009835.1	chr18	30114963	30117192	160	63	81	101.333
400597	chr2	231033334	231037959	AC009950.2	chr2	231032134	231032571	458	188	166	270.667
349948	chr2	60722184	60725012	AC009970.1	chr2	59524454	59533605	17	13	13	14.3333
349948	chr2	60722184	60725012	AC009970.1	chr2	59961480	59970189	16	11	9	12
349948	chr2	60722184	60725012	AC009970.1	chr2	60711097	60720944	296	261	253	270
400537	chr2	230856524	230861388	AC009973.1	chr2	230872818	230877233	59	35	44	46
400537	chr2	230856524	230861388	AC009973.1	chr2	231014721	231023219	20	15	23	19.3333
99898	chr10	125494351	125510302	AC009987.1	chr10	125089025	125103412	6	4	3	4.33333
99898	chr10	125494351	125510302	AC009987.1	chr10	125518984	125519797	72	36	29	45.6667
242481	chr15	44822817	44829911	AC009996.1	chr15	44578112	44591948	19	13	15	15.6667
242481	chr15	44822817	44829911	AC009996.1	chr15	44815653	44821505	287	125	107	173
245938	chr15	56050721	56059493	AC009997.1	chr15	56062778	56065377	349	112	112	191
245938	chr15	56050721	56059493	AC009997.1	chr15	56597990	56601806	3	4	2	3
666841	chr7	18469758	18490399	AC010082.2	chr7	18491450	18493239	332	77	104	171
380517	chr2	166935132	166948926	AC010127.3	chr2	166801234	166805505	24	6	11	13.6667
380517	chr2	166935132	166948926	AC010127.3	chr2	166925050	166926784	132	39	37	69.3333
380476	chr2	166787508	166792582	AC010127.5	chr2	166249120	166263334	11	4	4	6.33333
380476	chr2	166787508	166792582	AC010127.5	chr2	166777912	166779626	207	42	69	106
396965	chr2	218837220	218846235	AC010136.2	chr2	218651388	218662944	32	22	22	25.3333
396965	chr2	218837220	218846235	AC010136.2	chr2	218846312	218854150	207	78	138	141
370785	chr2	137300815	137304108	AC010146.1	chr2	137295654	137307261	1019	185	347	517
370785	chr2	137300815	137304108	AC010146.1	chr2	138586026	138595723	8	3	4	5
339383	chr2	25939081	25945218	AC010150.1	chr2	25949746	25957412	113	30	40	61
476661	chr3	134126245	134129192	AC010207.1	chr3	134120997	134133405	326	228	233	262.333
172511	chr12	101048492	101052686	AC010209.1	chr12	100629215	100640049	7	6	6	6.33333
172511	chr12	101048492	101052686	AC010209.1	chr12	101057580	101075779	282	89	41	137.333
590975	chr5	114937005	114941483	AC010226.4	chr5	114637936	114638714	125	55	53	77.6667
590975	chr5	114937005	114941483	AC010226.4	chr5	114934287	114945631	643	261	238	380.667
590975	chr5	114937005	114941483	AC010226.4	chr5	115184962	115185674	51	36	38	41.6667
590975	chr5	114937005	114941483	AC010226.4	chr5	115394080	115405506	39	16	20	25
590975	chr5	114937005	114941483	AC010226.4	chr5	115699166	115708920	6	3	3	4
591074	chr5	115288934	115299576	AC010282.1	chr5	115300388	115306519	490	114	132	245.333
602636	chr5	153469738	153475565	AC010295.1	chr5	153466748	153480938	182	146	157	161.667
602636	chr5	153469738	153475565	AC010295.1	chr5	153775029	153784311	31	23	10	21.3333
609392	chr5	175875815	175882043	AC010297.1	chr5	175864039	175864338	172	76	89	112.333
330453	chr19	51319574	51336187	AC010325.1	chr19	51342619	51344567	159	114	81	118
565785	chr5	35034176	35037074	AC010368.1	chr5	35031119	35042323	351	156	150	219
575869	chr5	67262227	67272248	AC010376.1	chr5	67273783	67274902	309	100	100	169.667
322293	chr19	12739871	12741616	AC010422.1	chr19	11979219	11995107	6	3	3	4
563594	chr5	27984805	27988774	AC010455.1	chr5	27993200	27994860	27	9	8	14.6667
589528	chr5	110603795	110607566	AC010468.2	chr5	110347519	110355512	8	8	4	6.66667
278289	chr16	87734983	87747486	AC010536.1	chr16	87756885	87757997	169	159	96	141.333
271829	chr16	62858452	62863213	AC010546.1	chr16	62852019	62852209	360	221	248	276.333
603568	chr5	156654508	156666310	AC010609.1	chr5	156645693	156648583	191	65	84	113.333
384455	chr2	179499966	179504080	AC010680.1	chr2	179494615	179496370	265	70	58	131
393255	chr2	207473769	207475203	AC010731.2	chr2	207467752	207478469	198	147	102	149
393275	chr2	207503231	207509772	AC010731.3	chr2	207511193	207514643	741	193	283	405.667
393275	chr2	207503231	207509772	AC010731.3	chr2	207718996	207728071	25	6	11	14
344061	chr2	41820977	41823735	AC010739.1	chr2	41826363	41826613	108	40	35	61
303026	chr18	21472406	21475822	AC010754.1	chr18	21464735	21471692	155	110	100	121.667
736007	chr8	97655976	97662338	AC010859.1	chr8	97652655	97655624	337	196	193	242
736007	chr8	97655976	97662338	AC010859.1	chr8	97868561	97872350	70	32	23	41.6667
338123	chr2	21344865	21349759	AC010872.2	chr2	21340471	21343332	303	115	100	172.667
338123	chr2	21344865	21349759	AC010872.2	chr2	21528741	21542281	12	3	8	7.66667
344502	chr2	43455071	43460452	AC010883.5	chr2	43449778	43450919	108	118	66	97.3333
344502	chr2	43455071	43460452	AC010883.5	chr2	43635830	43641988	45	24	30	33
344502	chr2	43455071	43460452	AC010883.5	chr2	43708977	43716302	64	44	28	45.3333
332904	chr2	3651725	3655755	AC010907.2	chr2	3662192	3666952	115	51	51	72.3333
103230	chr11	4463939	4472503	AC010930.1	chr11	4206213	4219862	30	16	16	20.6667
103230	chr11	4463939	4472503	AC010930.1	chr11	4458869	4460206	676	267	226	389.667
103230	chr11	4463939	4472503	AC010930.1	chr11	4618984	4624511	25	11	15	17
705190	chr7	150720024	150728615	AC010973.1	chr7	150731900	150739103	539	315	264	372.667
369589	chr2	133415643	133418532	AC010974.3	chr2	133421101	133428934	476	166	146	262.667
355485	chr2	79726832	79729925	AC010975.1	chr2	79731142	79735631	274	114	87	158.333
368206	chr2	128224215	128225863	AC010976.2	chr2	128214912	128229809	228	214	110	184
398171	chr2	223182946	223186906	AC010980.2	chr2	223191010	223194108	286	148	124	186
398171	chr2	223182946	223186906	AC010980.2	chr2	224327464	224334830	8	6	5	6.33333
85650	chr10	77152036	77167684	AC010997.1	chr10	77171382	77177795	173	93	106	124
85650	chr10	77152036	77167684	AC010997.1	chr10	77667937	77681351	34	10	11	18.3333
85650	chr10	77152036	77167684	AC010997.1	chr10	77797452	77802142	36	26	27	29.6667
85650	chr10	77152036	77167684	AC010997.1	chr10	78059618	78078540	15	8	7	10
246296	chr15	57255608	57268106	AC010999.1	chr15	57241817	57244492	36	12	20	22.6667
246296	chr15	57255608	57268106	AC010999.1	chr15	57417333	57426217	31	11	21	21
726618	chr8	67831881	67835836	AC011031.1	chr8	66539971	66550867	10	6	7	7.66667
726618	chr8	67831881	67835836	AC011031.1	chr8	66733513	66749353	9	5	4	6
726618	chr8	67831881	67835836	AC011031.1	chr8	67816124	67830263	242	260	142	214.667
726618	chr8	67831881	67835836	AC011031.1	chr8	67939891	67954850	38	22	31	30.3333
338840	chr2	23746714	23748787	AC011239.1	chr2	23744995	23745445	167	118	94	126.333
343104	chr2	38824491	38833092	AC011247.3	chr2	38839030	38853717	188	87	82	119
662432	chr7	3682500	3683828	AC011284.3	chr7	3679562	3681758	174	77	79	110
673385	chr7	39600890	39606716	AC011290.4	chr7	38827869	38844190	14	15	13	14
673385	chr7	39600890	39606716	AC011290.4	chr7	39776718	39781693	79	19	37	45
673385	chr7	39600890	39606716	AC011290.4	chr7	39867868	39872611	25	10	21	18.6667
675345	chr7	46798106	46804187	AC011294.3	chr7	46795361	46798000	405	112	108	208.333
495714	chr3	194864153	194868702	AC011325.1	chr3	194394495	194403841	51	36	30	39
495714	chr3	194864153	194868702	AC011325.1	chr3	194869112	194871165	382	243	206	277
600490	chr5	146453876	146465843	AC011357.1	chr5	146449708	146450163	283	92	132	169
604616	chr5	160082781	160092590	AC011363.1	chr5	160078111	160094550	345	125	203	224.333
589082	chr5	109216588	109220762	AC011366.3	chr5	109226808	109230346	171	55	66	97.3333
608277	chr5	171863813	171879294	AC011407.1	chr5	171859274	171861296	353	177	149	226.333
328339	chr19	39573814	39596841	AC011443.1	chr19	39602205	39605969	93	60	46	66.3333
330241	chr19	49841191	49852349	AC011450.1	chr19	49826541	49827661	44	43	27	38
328201	chr19	38543471	38546215	AC011465.1	chr19	38546475	38553713	515	448	282	415
324324	chr19	22784025	22790756	AC011467.2	chr19	22795533	22799956	167	97	77	113.667
321947	chr19	10733589	10757554	AC011475.1	chr19	10714362	10733285	116	72	70	86
321954	chr19	10777033	10778793	AC011475.2	chr19	10786221	10794126	377	383	261	340.333
329783	chr19	46992305	47002560	AC011484.1	chr19	47008270	47011712	100	48	35	61
328932	chr19	42920697	42933052	AC011497.1	chr19	42937624	42938384	191	183	134	169.333
329805	chr19	47099124	47105357	AC011551.1	chr19	47105827	47106566	9	8	13	10
699810	chr7	132031756	132038662	AC011625.1	chr7	132043453	132044950	177	59	68	101.333
699810	chr7	132031756	132038662	AC011625.1	chr7	132251298	132269149	20	10	9	13
674589	chr7	43562050	43573443	AC011738.4	chr7	43585011	43586384	109	76	53	79.3333
674589	chr7	43562050	43573443	AC011738.4	chr7	43739246	43743674	22	13	13	16
355813	chr2	80752200	80755142	AC011741.1	chr2	80756897	80758001	733	303	276	437.333
334448	chr2	8821099	8824736	AC011747.7	chr2	7380370	7382735	8	7	7	7.33333
334448	chr2	8821099	8824736	AC011747.7	chr2	7568575	7576294	19	16	8	14.3333
334448	chr2	8821099	8824736	AC011747.7	chr2	7925471	7932051	8	5	4	5.66667
334448	chr2	8821099	8824736	AC011747.7	chr2	8811210	8815510	149	101	76	108.667
341791	chr2	34628660	34632131	AC011748.1	chr2	34632274	34634275	159	48	44	83.6667
370560	chr2	136566352	136579822	AC011893.3	chr2	135760235	135779537	12	4	4	6.66667
370560	chr2	136566352	136579822	AC011893.3	chr2	136581899	136588696	347	112	114	191
370560	chr2	136566352	136579822	AC011893.3	chr2	137161492	137172873	11	6	12	9.66667
707014	chr7	157818448	157820817	AC011899.10	chr7	156837523	156844854	4	6	4	4.66667
707014	chr7	157818448	157820817	AC011899.10	chr7	157329264	157346543	14	14	9	12.3333
707014	chr7	157818448	157820817	AC011899.10	chr7	157814779	157826297	494	363	283	380
85882	chr10	77883554	77887431	AC012047.1	chr10	77134652	77152035	3	5	4	4
85882	chr10	77883554	77887431	AC012047.1	chr10	77879027	77879237	126	43	23	64
243408	chr15	47843264	47845877	AC012050.1	chr15	47841486	47851229	307	207	102	205.333
244379	chr15	51056770	51060365	AC012100.1	chr15	50741292	50756442	18	9	16	14.3333
244379	chr15	51056770	51060365	AC012100.1	chr15	51062782	51065599	547	272	241	353.333
244379	chr15	51056770	51060365	AC012100.1	chr15	51173444	51190101	88	49	43	60
714103	chr8	23625837	23626477	AC012119.1	chr8	23622763	23625598	190	196	152	179.333
714103	chr8	23625837	23626477	AC012119.1	chr8	23888795	23892278	7	9	5	7
305881	chr18	30343576	30351087	AC012123.1	chr18	30340698	30343061	162	59	47	89.3333
279668	chr17	5014569	5017238	AC012146.7	chr17	5006138	5012450	282	183	202	222.333
259818	chr16	5808644	5813214	AC012175.1	chr16	5807144	5818141	168	110	67	115
717705	chr8	35646020	35651234	AC012215.1	chr8	35640987	35645768	347	101	114	187.333
401943	chr2	236475721	236491563	AC012305.1	chr2	236472548	236474278	82	36	24	47.3333
359115	chr2	96867770	96885100	AC012307.3	chr2	96859148	96866717	335	85	71	163.667
359115	chr2	96867770	96885100	AC012307.3	chr2	97184917	97196240	10	4	5	6.33333
328023	chr19	37726761	37730425	AC012309.4	chr19	37732589	37734108	971	291	373	545
331118	chr19	54622003	54643157	AC012314.8	chr19	54647786	54653910	196	167	98	153.667
322526	chr19	14590371	14603445	AC012318.1	chr19	14531268	14540173	21	15	12	16
345003	chr2	45147796	45150147	AC012354.1	chr2	44704109	44721944	35	26	13	24.6667
345003	chr2	45147796	45150147	AC012354.1	chr2	45139317	45154392	494	413	453	453.333
348241	chr2	55504703	55510852	AC012358.1	chr2	55495767	55495937	290	197	191	226
348218	chr2	55435744	55447208	AC012358.7	chr2	55449358	55452899	241	59	73	124.333
348249	chr2	55534347	55538238	AC012358.8	chr2	55794352	55800975	49	12	27	29.3333
361711	chr2	105988215	105992684	AC012360.6	chr2	105995298	105996296	619	324	296	413
361711	chr2	105988215	105992684	AC012360.6	chr2	106498089	106517820	33	7	12	17.3333
361711	chr2	105988215	105992684	AC012360.6	chr2	106695277	106711724	14	11	4	9.66667
361711	chr2	105988215	105992684	AC012360.6	chr2	107193750	107195648	20	6	11	12.3333
366091	chr2	120972997	120976985	AC012363.4	chr2	120510868	120522212	16	12	22	16.6667
366091	chr2	120972997	120976985	AC012363.4	chr2	120978858	120988066	316	189	253	252.667
335215	chr2	11862104	11866370	AC012456.3	chr2	11854706	11860801	517	344	437	432.667
335215	chr2	11862104	11866370	AC012456.3	chr2	13131492	13143874	17	5	12	11.3333
335217	chr2	11885173	11887693	AC012456.4	chr2	11301504	11317773	8	9	11	9.33333
335217	chr2	11885173	11887693	AC012456.4	chr2	11613579	11614497	37	16	18	23.6667
335217	chr2	11885173	11887693	AC012456.4	chr2	11893967	11903906	209	141	132	160.667
335217	chr2	11885173	11887693	AC012456.4	chr2	12850571	12861951	21	9	7	12.3333
335217	chr2	11885173	11887693	AC012456.4	chr2	13131492	13139747	18	9	8	11.6667
339270	chr2	25420261	25430720	AC012457.2	chr2	25196087	25209404	32	13	31	25.3333
402654	chr2	239206977	239210547	AC012485.2	chr2	239200243	239206661	339	160	130	209.667
362628	chr2	109144635	109152181	AC012487.2	chr2	109158414	109166052	101	59	69	76.3333
362628	chr2	109144635	109152181	AC012487.2	chr2	109394954	109401997	13	10	5	9.33333
362628	chr2	109144635	109152181	AC012487.2	chr2	109891621	109904245	3	2	3	2.66667
384130	chr2	178560531	178566375	AC012499.1	chr2	178567346	178567842	168	73	39	93.3333
400782	chr2	231772014	231777477	AC012507.4	chr2	231762018	231780691	277	176	197	216.667
396458	chr2	217122614	217126407	AC012513.6	chr2	217117642	217121974	303	191	173	222.333
381876	chr2	171206926	171209245	AC012594.1	chr2	171202707	171203692	447	232	162	280.333
381876	chr2	171206926	171209245	AC012594.1	chr2	171663401	171664226	36	22	19	25.6667
263259	chr16	19603119	19613126	AC012621.1	chr16	19600100	19602433	836	196	447	493
263259	chr16	19603119	19613126	AC012621.1	chr16	19887988	19901112	78	36	34	49.3333
390480	chr2	198059736	198063912	AC013264.2	chr2	198056474	198067200	213	96	77	128.667
363056	chr2	110883581	110884921	AC013268.1	chr2	110889692	110892201	299	126	131	185.333
365887	chr2	120233357	120234537	AC013275.2	chr2	119774102	119792822	5	8	6	6.33333
171846	chr12	98997010	99001205	AC013283.1	chr12	98990932	98996949	170	118	59	115.667
674837	chr7	44812016	44830988	AC013436.6	chr7	44808380	44811973	270	129	147	182
372928	chr2	143761781	143765376	AC013444.1	chr2	143429366	143436971	22	18	13	17.6667
372928	chr2	143761781	143765376	AC013444.1	chr2	143758205	143771246	153	236	230	206.333
388056	chr2	190640564	190644188	AC013468.1	chr2	190314291	190321501	17	7	7	10.3333
388056	chr2	190640564	190644188	AC013468.1	chr2	190922236	190939750	18	5	6	9.66667
339711	chr2	27235655	27241543	AC013472.3	chr2	27220124	27231055	138	94	73	101.667
339709	chr2	27231056	27232697	AC013472.4	chr2	27214154	27220123	220	107	108	145
344158	chr2	42181346	42185198	AC013480.1	chr2	42175760	42179539	137	100	80	105.667
344179	chr2	42250839	42255725	AC013480.2	chr2	42255926	42263463	358	186	143	229
360392	chr2	101744828	101752846	AC013722.1	chr2	101731502	101742565	123	54	57	78
377864	chr2	158710443	158713813	AC013731.1	chr2	158700552	158704803	198	106	186	163.333
732884	chr8	87669585	87678149	AC013751.1	chr8	87665437	87666490	79	50	38	55.6667
102840	chr11	2878924	2889769	AC013791.10	chr11	2558431	2573010	48	31	17	32
102840	chr11	2878924	2889769	AC013791.10	chr11	2894689	2895792	209	153	98	153.333
747948	chr8	135604197	135611914	AC015599.1	chr8	135602197	135620382	371	159	165	231.667
258387	chr15	100888624	100891243	AC015723.1	chr15	100891547	100894783	20	16	13	16.3333
296708	chr17	75877699	75889984	AC015804.1	chr17	75313453	75321994	9	13	12	11.3333
296708	chr17	75877699	75889984	AC015804.1	chr17	75870295	75873316	373	287	220	293.333
252628	chr15	80214950	80219292	AC015871.2	chr15	80201849	80208109	25	22	20	22.3333
280957	chr17	10783608	10791885	AC015908.1	chr17	10775473	10778108	440	201	187	276
293056	chr17	61491614	61491812	AC015923.1	chr17	61488373	61495893	484	345	561	463.333
304285	chr18	25531042	25538289	AC015933.2	chr18	25544434	25548999	80	31	25	45.3333
288144	chr17	42979068	42995720	AC015936.3	chr17	42971011	42973638	269	188	167	208
339641	chr2	26893511	26897707	AC015977.6	chr2	26890850	26892695	105	67	60	77.3333
700848	chr7	135611431	135613304	AC015987.1	chr7	135606759	135610194	433	134	148	238.333
315218	chr18	60488852	60513017	AC015989.1	chr18	60518272	60519195	230	88	73	130.333
722218	chr8	53949717	53958099	AC016113.1	chr8	53944134	53944817	247	83	126	152
296830	chr17	76488337	76495298	AC016182.1	chr17	76485435	76485674	162	156	77	131.667
729422	chr8	76696203	76703622	AC016194.1	chr8	76707457	76713993	291	78	112	160.333
257134	chr15	96830894	96831899	AC016251.1	chr15	96824787	96833719	280	388	147	271.667
278915	chr17	1075669	1094570	AC016292.1	chr17	1095770	1097300	85	182	55	107.333
744434	chr8	123849078	123876494	AC016405.1	chr8	123882359	123890236	90	49	49	62.6667
559119	chr5	13170732	13175258	AC016553.1	chr5	13162928	13166194	332	74	107	171
559619	chr5	14906479	14911874	AC016575.1	chr5	14730041	14738920	17	11	15	14.3333
559619	chr5	14906479	14911874	AC016575.1	chr5	14897546	14903691	312	92	119	174.333
320931	chr19	4032971	4043411	AC016586.1	chr19	4044767	4045550	56	67	40	54.3333
572253	chr5	56231243	56241729	AC016644.1	chr5	55548355	55558887	20	8	14	14
572253	chr5	56231243	56241729	AC016644.1	chr5	56228457	56229898	491	125	174	263.333
355706	chr2	80470450	80474263	AC016670.1	chr2	80474394	80476503	809	270	237	438.667
363916	chr2	113922865	113938924	AC016683.5	chr2	113896064	113913602	34	28	15	25.6667
363918	chr2	113959161	113969848	AC016683.6	chr2	113975079	113977017	192	134	111	145.667
342928	chr2	38262015	38264301	AC016689.1	chr2	37806238	37810446	9	6	9	8
342928	chr2	38262015	38264301	AC016689.1	chr2	38269729	38275591	172	105	107	128
393750	chr2	209118065	209122124	AC016697.3	chr2	208004381	208020121	3	3	5	3.66667
393750	chr2	209118065	209122124	AC016697.3	chr2	208477428	208486878	18	12	7	12.3333
393750	chr2	209118065	209122124	AC016697.3	chr2	209123052	209129298	316	121	105	180.667
372702	chr2	143069651	143072487	AC016706.1	chr2	143064529	143068550	350	174	168	230.667
372702	chr2	143069651	143072487	AC016706.1	chr2	144046833	144047164	3	4	2	3
355641	chr2	80254559	80259712	AC016716.2	chr2	80260864	80267162	405	206	217	276
345553	chr2	47078934	47085466	AC016722.3	chr2	47087848	47088197	387	193	220	266.667
381112	chr2	168797156	168798978	AC016723.4	chr2	168793657	168796585	469	174	118	253.667
365833	chr2	120001588	120012611	AC016736.2	chr2	120012702	120016839	91	65	36	64
360346	chr2	101593126	101596772	AC016738.3	chr2	101215194	101227040	31	25	11	22.3333
360346	chr2	101593126	101596772	AC016738.3	chr2	101343308	101355720	12	15	6	11
360346	chr2	101593126	101596772	AC016738.3	chr2	101581881	101587119	148	83	136	122.333
383547	chr2	176753831	176772031	AC016751.3	chr2	176461034	176477041	2	2	3	2.33333
383547	chr2	176753831	176772031	AC016751.3	chr2	176748921	176751680	139	32	44	71.6667
402624	chr2	239071229	239078324	AC016757.1	chr2	239087286	239087476	120	153	116	129.667
402642	chr2	239134204	239140787	AC016757.3	chr2	239131964	239133132	479	222	211	304
366294	chr2	121791158	121792988	AC016764.1	chr2	121783120	121795924	358	198	185	247
366294	chr2	121791158	121792988	AC016764.1	chr2	122094035	122110193	15	7	6	9.33333
84141	chr10	71123308	71123624	AC016821.1	chr10	70733133	70742710	34	18	17	23
84141	chr10	71123308	71123624	AC016821.1	chr10	71121843	71122217	895	494	353	580.667
340543	chr2	30272929	30289656	AC016907.1	chr2	30267614	30272791	113	42	25	60
340567	chr2	30360487	30371449	AC016907.3	chr2	29536882	29549854	8	10	3	7
340567	chr2	30360487	30371449	AC016907.3	chr2	30356898	30358167	813	228	310	450.333
340567	chr2	30360487	30371449	AC016907.3	chr2	30677435	30682580	18	8	7	11
340567	chr2	30360487	30371449	AC016907.3	chr2	30910564	30927301	40	15	13	22.6667
369677	chr2	133668372	133676225	AC016909.1	chr2	133666107	133668357	341	92	112	181.667
373216	chr2	144693938	144696604	AC016910.1	chr2	144691190	144702317	788	145	159	364
362101	chr2	107450623	107450921	AC016994.2	chr2	107445050	107447604	552	297	256	368.333
345328	chr2	46304451	46309557	AC017006.2	chr2	46310912	46311543	603	305	284	397.333
345328	chr2	46304451	46309557	AC017006.2	chr2	46587583	46598734	40	22	15	25.6667
345328	chr2	46304451	46309557	AC017006.2	chr2	46872080	46883258	17	12	8	12.3333
345348	chr2	46389475	46395336	AC017006.3	chr2	46381656	46400559	239	149	117	168.333
345348	chr2	46389475	46395336	AC017006.3	chr2	46571453	46587582	21	16	13	16.6667
402862	chr2	240081688	240090513	AC017028.1	chr2	240069099	240076479	661	384	215	420
402862	chr2	240081688	240090513	AC017028.1	chr2	240927592	240936127	42	29	36	35.6667
352264	chr2	68454688	68458546	AC017083.1	chr2	69394773	69402439	8	3	2	4.33333
352276	chr2	68499363	68503707	AC017083.2	chr2	68493845	68510110	566	197	226	329.667
352276	chr2	68499363	68503707	AC017083.2	chr2	69388126	69396782	8	2	3	4.33333
352265	chr2	68458547	68461186	AC017083.3	chr2	68461489	68473582	178	103	102	127.667
352265	chr2	68458547	68461186	AC017083.3	chr2	68993548	69004954	10	8	6	8
352865	chr2	70678061	70686539	AC017084.1	chr2	70687532	70690404	874	360	358	530.667
400909	chr2	232316580	232318550	AC017104.2	chr2	232087517	232094110	205	100	99	134.667
400909	chr2	232316580	232318550	AC017104.2	chr2	232321430	232332442	1215	215	201	543.667
479226	chr3	142882975	142887640	AC018450.1	chr3	142875430	142893733	570	224	181	325
479226	chr3	142882975	142887640	AC018450.1	chr3	143146944	143164713	28	9	12	16.3333
479226	chr3	142882975	142887640	AC018450.1	chr3	143695658	143706102	10	5	3	6
239155	chr15	33249877	33256595	AC018515.1	chr15	32953085	32962148	57	12	17	28.6667
239155	chr15	33249877	33256595	AC018515.1	chr15	33239737	33240231	166	70	101	112.333
266914	chr16	34679928	34683109	AC018558.1	chr16	34671804	34675019	523	133	128	261.333
292694	chr17	60089008	60102448	AC018628.1	chr17	60077580	60079028	158	55	98	103.667
699535	chr7	131010766	131014763	AC018642.1	chr7	130789769	130799939	55	70	55	60
699535	chr7	131010766	131014763	AC018642.1	chr7	131021391	131023103	283	125	128	178.667
699794	chr7	131943941	131947790	AC018643.4	chr7	131948310	131956041	78	39	41	52.6667
374302	chr2	147889185	147892764	AC018678.1	chr2	147885683	147899121	385	218	189	264
374302	chr2	147889185	147892764	AC018678.1	chr2	148653387	148663000	13	7	16	12
345424	chr2	46655549	46657113	AC018682.6	chr2	46667091	46667527	102	85	61	82.6667
345424	chr2	46655549	46657113	AC018682.6	chr2	46869610	46883258	20	15	14	16.3333
359967	chr2	100113943	100156231	AC018690.1	chr2	100160335	100161102	221	83	77	127
343143	chr2	39088831	39090117	AC018693.6	chr2	39074302	39081661	223	96	99	139.333
361565	chr2	105466818	105475583	AC018730.1	chr2	105057791	105062682	33	28	23	28
361565	chr2	105466818	105475583	AC018730.1	chr2	105479249	105482953	152	58	43	84.3333
330583	chr19	52089926	52098767	AC018755.11	chr19	52087690	52089281	556	293	256	368.333
438393	chr3	4922743	4934001	AC018816.3	chr3	4937141	4937511	237	88	96	140.333
387032	chr2	187359727	187364693	AC018867.1	chr2	187366424	187367453	512	183	194	296.333
387032	chr2	187359727	187364693	AC018867.1	chr2	187718900	187722434	12	7	6	8.33333
387032	chr2	187359727	187364693	AC018867.1	chr2	188312439	188319791	21	13	23	19
361926	chr2	106795423	106796052	AC018878.3	chr2	106787211	106800312	388	255	254	299
361926	chr2	106795423	106796052	AC018878.3	chr2	107156772	107170145	22	21	15	19.3333
333985	chr2	7217303	7221612	AC019048.1	chr2	7209897	7214782	249	134	111	164.667
397577	chr2	221323838	221341887	AC019051.1	chr2	221321127	221321560	273	113	144	176.667
675603	chr7	47800071	47804453	AC019066.3	chr7	47806336	47817585	346	81	76	167.667
402141	chr2	237296564	237304237	AC019068.2	chr2	237945433	237962706	7	9	9	8.33333
362535	chr2	108833744	108836074	AC019100.3	chr2	108826843	108843128	381	129	147	219
362535	chr2	108833744	108836074	AC019100.3	chr2	109184793	109195002	14	8	10	10.6667
362535	chr2	108833744	108836074	AC019100.3	chr2	109479770	109489984	15	7	6	9.33333
526103	chr4	99846712	99851952	AC019131.1	chr4	99165437	99178855	27	10	7	14.6667
526103	chr4	99846712	99851952	AC019131.1	chr4	99842117	99845607	423	243	228	298
526103	chr4	99846712	99851952	AC019131.1	chr4	100488065	100497977	18	9	15	14
380114	chr2	165693725	165698989	AC019181.2	chr2	165690649	165693555	157	45	56	86
377739	chr2	158296257	158299768	AC019201.1	chr2	158177590	158189477	48	40	34	40.6667
377739	chr2	158296257	158299768	AC019201.1	chr2	158290931	158292036	546	253	181	326.667
377739	chr2	158296257	158299768	AC019201.1	chr2	158865663	158879903	11	5	16	10.6667
377739	chr2	158296257	158299768	AC019201.1	chr2	159318918	159334630	9	3	5	5.66667
287489	chr17	39649147	39660161	AC019349.5	chr17	39058705	39072965	9	5	8	7.33333
287489	chr17	39649147	39660161	AC019349.5	chr17	39660237	39661836	67	49	45	53.6667
341543	chr2	33788111	33788883	AC020594.5	chr2	32996155	33003879	15	4	8	9
341543	chr2	33788111	33788883	AC020594.5	chr2	33781772	33790647	609	310	313	410.667
443967	chr3	23808200	23812125	AC020626.1	chr3	23816719	23817015	206	118	105	143
481794	chr3	150635201	150636310	AC020636.1	chr3	150632416	150643439	883	591	349	607.667
241785	chr15	42184107	42197376	AC020659.1	chr15	42198701	42200511	412	231	202	281.667
543852	chr4	154792622	154798776	AC020703.1	chr4	154799013	154812092	544	125	229	299.333
676327	chr7	50175558	50188164	AC020743.2	chr7	50442591	50452435	49	10	22	27
676327	chr7	50175558	50188164	AC020743.2	chr7	51227512	51235778	14	5	9	9.33333
273813	chr16	70779902	70791759	AC020763.1	chr16	70794120	70795672	473	267	251	330.333
584894	chr5	95919184	95927048	AC020900.1	chr5	95189231	95205971	26	10	10	15.3333
331331	chr19	55892329	55898826	AC020922.1	chr19	55900438	55904871	610	510	406	508.667
601303	chr5	148978642	148996459	AC021078.1	chr5	149194703	149209129	60	17	22	33
601303	chr5	148978642	148996459	AC021078.1	chr5	149360139	149366346	21	18	13	17.3333
359137	chr2	96986565	96990459	AC021188.4	chr2	97002287	97008828	374	197	187	252.667
359137	chr2	96986565	96990459	AC021188.4	chr2	97410767	97425683	18	16	20	18
706512	chr7	155755323	155756273	AC021218.2	chr7	155757904	155763205	415	171	130	238.667
296762	chr17	76103774	76107152	AC021593.1	chr17	76109671	76109909	307	324	176	269
114242	chr11	39881609	39884051	AC021749.1	chr11	39877167	39877464	194	54	73	107
249936	chr15	70069866	70077900	AC021818.1	chr15	70079155	70079963	57	53	43	51
72602	chr10	28596640	28600773	AC022021.1	chr10	28601051	28606107	347	196	189	244
322481	chr19	14170311	14187744	AC022098.1	chr19	14189448	14191954	35	37	24	32
604808	chr5	160656676	160657354	AC022120.1	chr5	160658183	160660551	253	166	91	170
585597	chr5	97974926	97975107	AC022142.1	chr5	96589724	96604139	18	7	13	12.6667
585597	chr5	97974926	97975107	AC022142.1	chr5	97277276	97284030	14	13	12	13
585597	chr5	97974926	97975107	AC022142.1	chr5	97405897	97408738	17	17	11	15
585597	chr5	97974926	97975107	AC022142.1	chr5	97969768	97970026	651	287	278	405.333
328088	chr19	38028682	38042885	AC022148.1	chr19	38024565	38028144	242	64	96	134
701523	chr7	137636045	137645086	AC022173.2	chr7	137633112	137648107	217	96	70	127.667
701523	chr7	137636045	137645086	AC022173.2	chr7	138146036	138153844	8	5	3	5.33333
322186	chr19	12162841	12171530	AC022415.4	chr19	11908846	11913139	20	20	13	17.6667
322186	chr19	12162841	12171530	AC022415.4	chr19	11993788	11999892	28	19	12	19.6667
322186	chr19	12162841	12171530	AC022415.4	chr19	12155576	12157059	128	107	76	103.667
322205	chr19	12262669	12269340	AC022415.5	chr19	11993788	11995107	23	14	14	17
322205	chr19	12262669	12269340	AC022415.5	chr19	12256018	12256716	122	122	82	108.667
572142	chr5	55901742	55902125	AC022431.2	chr5	55897503	55906099	531	402	325	419.333
572142	chr5	55901742	55902125	AC022431.2	chr5	56119231	56124361	39	33	28	33.3333
493457	chr3	187889620	187901214	AC022498.1	chr3	187467746	187475954	37	14	24	25
493457	chr3	187889620	187901214	AC022498.1	chr3	187889169	187889613	428	190	410	342.667
493457	chr3	187889620	187901214	AC022498.1	chr3	188668611	188671087	19	7	12	12.6667
493457	chr3	187889620	187901214	AC022498.1	chr3	188857581	188863992	11	3	13	9
83094	chr10	67465854	67473870	AC022538.1	chr10	67477021	67485577	221	113	142	158.667
258206	chr15	100257875	100263888	AC022692.1	chr15	100265274	100269324	40	26	27	31
250599	chr15	72339044	72344992	AC022872.1	chr15	72333323	72337095	267	130	162	186.333
258642	chr15	101816805	101818647	AC023024.1	chr15	101810931	101815370	437	381	284	367.333
258642	chr15	101816805	101818647	AC023024.1	chr15	102179537	102181816	68	44	46	52.6667
151332	chr12	32052599	32069592	AC023050.1	chr12	32070817	32071580	177	73	65	105
724625	chr8	61604423	61604944	AC023102.1	chr8	61607414	61610707	385	291	217	297.667
724625	chr8	61604423	61604944	AC023102.1	chr8	61935042	61949118	44	15	29	29.3333
710112	chr8	9944105	9953342	AC023385.1	chr8	9954730	9973678	227	220	329	258.667
375670	chr2	151904591	151906592	AC023469.1	chr2	151899826	151904209	224	65	84	124.333
375640	chr2	151836635	151846615	AC023469.2	chr2	151831327	151835553	297	63	66	142
149093	chr12	25157789	25161205	AC023510.1	chr12	25147901	25167420	266	38	46	116.667
154376	chr12	42465506	42487837	AC023513.1	chr12	41358270	41378249	5	2	2	3
154376	chr12	42465506	42487837	AC023513.1	chr12	42488938	42492973	344	106	110	186.667
742924	chr8	119292651	119294751	AC023590.1	chr8	117882984	117884661	4	3	8	5
742924	chr8	119292651	119294751	AC023590.1	chr8	118534547	118541888	22	11	10	14.3333
742924	chr8	119292651	119294751	AC023590.1	chr8	119289273	119298885	583	335	350	422.667
474737	chr3	127381579	127388663	AC023593.1	chr3	127377477	127377633	376	270	221	289
474737	chr3	127381579	127388663	AC023593.1	chr3	127678848	127688403	37	10	19	22
496054	chr3	196359104	196362168	AC023797.1	chr3	196351848	196356134	239	193	163	198.333
443378	chr3	21871007	21871666	AC023798.1	chr3	21873390	21884494	341	201	129	223.667
267666	chr16	48438126	48458019	AC023818.1	chr16	48427942	48428546	89	52	56	65.6667
438019	chr3	3684100	3692160	AC024158.1	chr3	3694764	3697285	586	203	219	336
438019	chr3	3684100	3692160	AC024158.1	chr3	4320206	4328364	13	3	11	9
438276	chr3	4529815	4535454	AC024168.2	chr3	3204266	3216678	6	4	5	5
438276	chr3	4529815	4535454	AC024168.2	chr3	4523503	4527876	368	148	120	212
438276	chr3	4529815	4535454	AC024168.2	chr3	4903910	4913363	13	7	11	10.3333
438276	chr3	4529815	4535454	AC024168.2	chr3	5694386	5696987	3	4	7	4.66667
529987	chr4	111774326	111779159	AC024198.1	chr4	111781077	111783513	349	96	106	183.667
706125	chr7	154401097	154403856	AC024239.1	chr7	154404307	154406121	262	133	123	172.667
253577	chr15	83875407	83891067	AC024270.1	chr15	83869291	83870248	139	52	60	83.6667
578945	chr5	77347429	77357513	AC024568.1	chr5	77138005	77150472	42	8	9	19.6667
578945	chr5	77347429	77357513	AC024568.1	chr5	77357951	77358423	390	91	90	190.333
285696	chr17	32191778	32206026	AC024610.1	chr17	32178239	32189016	106	31	39	58.6667
151202	chr12	31476368	31479637	AC024940.1	chr12	31467990	31473143	415	178	176	256.333
151202	chr12	31476368	31479637	AC024940.1	chr12	32522106	32528607	19	10	16	15
151202	chr12	31476368	31479637	AC024940.1	chr12	32821463	32830201	8	10	9	9
275194	chr16	75731697	75740650	AC025287.1	chr16	75741413	75741737	45	14	16	25
160569	chr12	64495191	64497303	AC025576.1	chr12	64488458	64494136	142	136	58	112
698909	chr7	128540671	128551819	AC025594.1	chr7	128551827	128553573	49	63	88	66.6667
246900	chr15	59179669	59185922	AC025918.2	chr15	59186625	59187545	390	161	201	250.667
246900	chr15	59179669	59185922	AC025918.2	chr15	59367032	59376926	51	20	27	32.6667
246900	chr15	59179669	59185922	AC025918.2	chr15	59944510	59962293	27	9	9	15
438481	chr3	5228182	5235779	AC026202.3	chr3	4753010	4763161	16	21	10	15.6667
438481	chr3	5228182	5235779	AC026202.3	chr3	4906062	4913363	22	10	13	15
151673	chr12	33194147	33213965	AC026357.1	chr12	33190355	33194066	404	90	115	203
581301	chr5	84823412	84825128	AC026700.1	chr5	84820467	84821570	422	186	151	253
565061	chr5	32784706	32790384	AC026703.1	chr5	32793759	32795901	306	105	112	174.333
556398	chr5	4297737	4306828	AC026711.1	chr5	4290626	4296598	457	208	135	266.667
583602	chr5	92051477	92053230	AC026781.1	chr5	92047177	92050299	278	58	51	129
556981	chr5	6111603	6119622	AC026797.1	chr5	6121433	6122239	250	83	75	136
565711	chr5	34793158	34802761	AC026801.2	chr5	34790113	34809856	643	124	234	333.667
330163	chr19	49417733	49426104	AC026803.14	chr19	49408950	49417671	200	166	139	168.333
459584	chr3	76466794	76471364	AC026877.1	chr3	76472310	76478598	165	36	36	79
253171	chr15	82335167	82338934	AC026956.1	chr15	81296936	81303177	5	6	8	6.33333
253171	chr15	82335167	82338934	AC026956.1	chr15	82229707	82240279	49	27	30	35.3333
253171	chr15	82335167	82338934	AC026956.1	chr15	82323796	82324699	173	139	121	144.333
280717	chr17	9720720	9726801	AC027045.1	chr17	9728912	9731924	11	16	5	10.6667
743887	chr8	122195647	122200017	AC027238.1	chr8	122186848	122202362	300	177	99	192
273841	chr16	70905383	70907438	AC027281.1	chr16	70907620	70909505	956	436	427	606.333
280141	chr17	6907157	6920155	AC027763.2	chr17	6564954	6569606	17	5	14	12
253815	chr15	84652681	84659759	AC027807.1	chr15	84647930	84664636	257	117	102	158.667
525642	chr4	98402897	98412896	AC034154.1	chr4	98415246	98415433	534	249	287	356.667
601753	chr5	150747876	150751086	AC034205.1	chr5	149983210	149988277	9	5	5	6.33333
601753	chr5	150747876	150751086	AC034205.1	chr5	150739673	150741914	369	160	84	204.333
601753	chr5	150747876	150751086	AC034205.1	chr5	150983509	151000906	23	7	15	15
596241	chr5	131346228	131348836	AC034228.2	chr5	130766034	130772465	8	6	7	7
596241	chr5	131346228	131348836	AC034228.2	chr5	130922554	130928481	47	33	27	35.6667
596241	chr5	131346228	131348836	AC034228.2	chr5	131337291	131338043	106	107	65	92.6667
596239	chr5	131338044	131341756	AC034228.3	chr5	130764077	130780544	16	10	8	11.3333
596239	chr5	131338044	131341756	AC034228.3	chr5	130922554	130928481	72	36	31	46.3333
596239	chr5	131338044	131341756	AC034228.3	chr5	131336834	131337290	318	282	229	276.333
596214	chr5	131268217	131282809	AC034228.4	chr5	131261826	131265850	358	81	106	181.667
591099	chr5	115378790	115379689	AC034236.1	chr5	114637936	114643560	15	7	9	10.3333
591099	chr5	115378790	115379689	AC034236.1	chr5	115372005	115375901	299	130	134	187.667
591095	chr5	115356251	115372004	AC034236.2	chr5	115374017	115375901	256	116	86	152.667
598088	chr5	138085055	138091406	AC034243.1	chr5	138078382	138084249	255	144	123	174
598088	chr5	138085055	138091406	AC034243.1	chr5	138607458	138613110	25	20	27	24
302299	chr18	18635617	18642649	AC036178.1	chr18	18643550	18643728	689	262	319	423.333
292982	chr17	61274653	61275321	AC037445.1	chr17	61275342	61278380	586	228	201	338.333
273082	chr16	67259494	67270530	AC040160.1	chr16	67050843	67065067	30	31	38	33
273082	chr16	67259494	67270530	AC040160.1	chr16	67251160	67251957	434	340	381	385
270739	chr16	59446558	59448694	AC040163.1	chr16	59444585	59460740	206	114	57	125.667
296306	chr17	73965350	73987299	AC040980.1	chr17	73955271	73961639	81	29	12	40.6667
495562	chr3	194303099	194309010	AC046143.5	chr3	194315567	194317209	234	121	104	153
495562	chr3	194303099	194309010	AC046143.5	chr3	194994870	194995870	6	10	15	10.3333
723141	chr8	56948717	56962004	AC046176.1	chr8	56708596	56708795	54	38	35	42.3333
723141	chr8	56948717	56962004	AC046176.1	chr8	56966771	56977211	115	43	163	107
397295	chr2	220285999	220296217	AC053503.6	chr2	220281350	220282393	347	248	242	279
533797	chr4	123537947	123541498	AC053545.3	chr4	123535123	123537856	797	192	296	428.333
480172	chr3	145614897	145620836	AC055758.1	chr3	145609970	145624813	560	153	182	298.333
496367	chr3	197556482	197564315	AC055764.1	chr3	197568581	197569420	290	105	129	174.667
287919	chr17	41825537	41827515	AC055813.1	chr17	41829311	41830174	504	443	333	426.667
257376	chr15	97632988	97635929	AC055873.1	chr15	97629146	97632785	271	111	90	157.333
376842	chr2	155538447	155554993	AC061961.2	chr2	155556747	155558879	66	19	32	39
296800	chr17	76309328	76312541	AC061992.2	chr17	76301432	76307691	118	116	86	106.667
468478	chr3	107081833	107093293	AC063944.1	chr3	107649557	107666878	8	4	8	6.66667
169924	chr12	92814194	92815377	AC063949.1	chr12	91772179	91787039	7	2	3	4
596281	chr5	131516144	131526401	AC063976.4	chr5	131528268	131538370	232	68	168	156
330504	chr19	51666063	51674037	AC063977.1	chr19	51761256	51762745	47	35	33	38.3333
401989	chr2	236691274	236695891	AC064874.1	chr2	236684094	236700958	325	82	70	159
401989	chr2	236691274	236695891	AC064874.1	chr2	237962707	237973440	6	7	2	5
364532	chr2	115913220	115921819	AC066593.1	chr2	115921898	115923060	229	95	99	141
81983	chr10	63684545	63688453	AC067742.1	chr10	63688504	63693656	349	128	145	207.333
388463	chr2	191877639	191893225	AC067945.2	chr2	191894367	191896132	283	132	152	189
344954	chr2	45009025	45016067	AC067957.1	chr2	45017910	45021292	334	177	210	240.333
99947	chr10	125668607	125671456	AC068058.1	chr10	125671490	125673263	106	70	53	76.3333
381872	chr2	171196248	171202103	AC068280.1	chr2	171202707	171203692	313	149	125	195.667
381872	chr2	171196248	171202103	AC068280.1	chr2	171663401	171664226	17	13	17	15.6667
333079	chr2	4267389	4278492	AC068292.1	chr2	4264333	4266008	582	180	240	334
709626	chr8	8238661	8248628	AC068353.1	chr8	8233683	8237389	948	496	574	672.667
320317	chr18	77421105	77447969	AC068473.1	chr18	77137145	77153597	10	8	11	9.66667
320317	chr18	77421105	77447969	AC068473.1	chr18	77451114	77458928	174	86	75	111.667
306561	chr18	32392811	32401125	AC068506.1	chr18	32387853	32390110	546	175	235	318.667
364436	chr2	115582385	115598189	AC068542.1	chr2	115575446	115576776	226	60	95	127
746216	chr8	129821061	129833018	AC068570.1	chr8	129834258	129834951	721	167	240	376
173309	chr12	103614315	103637450	AC068643.1	chr12	103608582	103611484	350	113	156	206.333
383691	chr2	177244837	177252725	AC068706.1	chr2	177244481	177244796	180	48	61	96.3333
473287	chr3	122000412	122001729	AC068754.1	chr3	121820591	121830288	38	15	17	23.3333
473287	chr3	122000412	122001729	AC068754.1	chr3	121995372	122006749	342	136	141	206.333
144600	chr12	10653442	10658739	AC068775.1	chr12	10643583	10645256	37	7	14	19.3333
176945	chr12	117705814	117723821	AC068799.1	chr12	117726260	117727527	312	127	126	188.333
176945	chr12	117705814	117723821	AC068799.1	chr12	118261163	118264369	7	8	5	6.66667
255575	chr15	91477137	91484708	AC068831.3	chr15	91474708	91475551	290	285	262	279
255583	chr15	91509387	91510054	AC068831.8	chr15	90254076	90268746	16	8	7	10.3333
255583	chr15	91509387	91510054	AC068831.8	chr15	90864444	90873036	22	5	7	11.3333
255583	chr15	91509387	91510054	AC068831.8	chr15	91018675	91033245	27	17	16	20
255583	chr15	91509387	91510054	AC068831.8	chr15	91511114	91518812	948	315	480	581
482025	chr3	151349921	151356323	AC069067.1	chr3	151345291	151349840	432	90	99	207
252377	chr15	79400377	79407603	AC069082.1	chr15	79397307	79416178	149	83	81	104.333
377951	chr2	159022782	159028219	AC069146.2	chr2	158172396	158177589	18	5	6	9.66667
377951	chr2	159022782	159028219	AC069146.2	chr2	159018251	159031440	530	183	219	310.667
495931	chr3	195963352	195978341	AC069257.8	chr3	195955685	195962453	583	117	139	279.667
662368	chr7	3445945	3459460	AC069286.1	chr7	3444252	3460678	386	130	159	225
705095	chr7	150280112	150283829	AC069304.1	chr7	150275823	150278790	394	220	216	276.667
286345	chr17	34405627	34410796	AC069363.1	chr17	34399130	34404284	596	219	183	332.667
248615	chr15	65130647	65137299	AC069368.3	chr15	65128476	65129851	389	393	300	360.667
353798	chr2	74206925	74215413	AC073046.4	chr2	74192011	74195810	46	52	33	43.6667
397188	chr2	219793126	219799268	AC073128.10	chr2	219789857	219790817	279	81	76	145.333
694906	chr7	115967531	115969615	AC073130.3	chr7	115971061	115977738	521	314	348	394.333
401154	chr2	233449164	233457454	AC073254.1	chr2	233457809	233460541	393	199	167	253
340639	chr2	30654269	30656625	AC073255.1	chr2	30650274	30653889	736	206	278	406.667
353832	chr2	74361314	74362538	AC073263.1	chr2	74352611	74353398	476	260	279	338.333
345612	chr2	47292124	47300128	AC073283.7	chr2	47281047	47288981	129	98	76	101
345612	chr2	47292124	47300128	AC073283.7	chr2	47524343	47531955	43	40	14	32.3333
666287	chr7	16755654	16766587	AC073333.8	chr7	16770673	16774015	52	14	12	26
702925	chr7	142977819	142989457	AC073342.12	chr7	142697097	142711814	14	11	9	11.3333
702925	chr7	142977819	142989457	AC073342.12	chr7	142989567	142991185	261	133	111	168.333
663042	chr7	6713226	6713790	AC073343.1	chr7	6716755	6722092	816	394	412	540.667
693863	chr7	112749478	112761357	AC073346.2	chr7	112575177	112578681	37	18	14	23
693863	chr7	112749478	112761357	AC073346.2	chr7	112763187	112765513	307	152	161	206.667
693985	chr7	113090855	113091667	AC073348.1	chr7	113089205	113094336	631	298	335	421.333
97734	chr10	117874268	117880882	AC073588.1	chr10	117870974	117885370	349	129	165	214.333
789572	chrX	16393742	16396904	AC073597.1	chrX	16391314	16391528	97	33	36	55.3333
296936	chr17	77021883	77025543	AC073624.1	chr17	77017137	77018704	570	376	296	414
398675	chr2	224824290	224834357	AC073641.2	chr2	224806501	224808296	39	23	27	29.6667
398675	chr2	224824290	224834357	AC073641.2	chr2	225444427	225456812	6	8	3	5.66667
698602	chr7	127289511	127298661	AC073934.6	chr7	127031400	127034709	32	23	15	23.3333
698602	chr7	127289511	127298661	AC073934.6	chr7	127859599	127862696	22	16	7	15
661961	chr7	1065596	1082452	AC073957.15	chr7	1084762	1087408	507	367	303	392.333
340130	chr2	28884399	28889659	AC074011.2	chr2	27939467	27952335	7	13	8	9.33333
340130	chr2	28884399	28889659	AC074011.2	chr2	28891576	28899908	468	414	359	413.667
339846	chr2	27803057	27808708	AC074091.1	chr2	27798271	27798891	357	217	209	261
339877	chr2	27937293	27939466	AC074091.13	chr2	27929976	27946355	141	144	162	149
566793	chr5	38081824	38083520	AC074129.1	chr5	38080362	38085434	593	129	233	318.333
327872	chr19	37177995	37182425	AC074138.3	chr19	37175224	37176963	556	270	278	368
329646	chr19	46234256	46237240	AC074212.3	chr19	46237393	46252024	217	134	104	151.667
86653	chr10	80502066	80511954	AC074323.1	chr10	79807299	79813632	7	9	13	9.66667
86653	chr10	80502066	80511954	AC074323.1	chr10	80013395	80015730	13	11	16	13.3333
86653	chr10	80502066	80511954	AC074323.1	chr10	80512279	80513823	372	256	238	288.667
662053	chr7	1725636	1738329	AC074389.6	chr7	1740465	1747974	440	161	165	255.333
351565	chr2	66267516	66273866	AC074391.1	chr2	66072043	66087706	23	7	7	12.3333
351565	chr2	66267516	66273866	AC074391.1	chr2	66264710	66277603	97	150	138	128.333
470362	chr3	112809412	112816861	AC078785.1	chr3	112361338	112380364	19	7	11	12.3333
470362	chr3	112809412	112816861	AC078785.1	chr3	112983649	112999195	58	17	22	32.3333
473467	chr3	122644652	122651221	AC078794.1	chr3	122641894	122643664	344	202	146	230.667
487946	chr3	169484905	169489846	AC078802.1	chr3	168855640	168865687	4	5	4	4.33333
487946	chr3	169484905	169489846	AC078802.1	chr3	169044289	169052208	7	5	4	5.33333
487946	chr3	169484905	169489846	AC078802.1	chr3	169478351	169481881	131	72	77	93.3333
173530	chr12	104371119	104380113	AC078819.2	chr12	104361086	104370716	196	63	74	111
371895	chr2	140576543	140584459	AC078851.1	chr2	140569969	140573539	61	19	15	31.6667
468812	chr3	108038255	108039759	AC078855.1	chr3	108040513	108043145	556	282	196	344.667
551532	chr4	178463156	178484989	AC078881.1	chr4	178486679	178487746	58	25	12	31.6667
382540	chr2	173322334	173335974	AC078883.3	chr2	172548622	172567844	6	8	6	6.66667
382540	chr2	173322334	173335974	AC078883.3	chr2	173036103	173043505	105	43	37	61.6667
382540	chr2	173322334	173335974	AC078883.3	chr2	173320118	173336525	188	188	123	166.333
165619	chr12	79740605	79743724	AC078917.1	chr12	79734916	79739975	403	121	98	207.333
707119	chr7	158326446	158334419	AC078942.1	chr7	158819756	158830489	12	5	6	7.66667
488572	chr3	171524708	171529566	AC078953.1	chr3	171529628	171532213	155	165	140	153.333
789546	chrX	16314814	16317457	AC078993.1	chrX	16308722	16324238	175	63	52	96.6667
292355	chr17	58886757	58893300	AC079005.1	chr17	59390710	59403605	11	3	8	7.33333
553577	chr4	185188446	185189692	AC079080.1	chr4	185196939	185197299	194	161	153	169.333
553577	chr4	185188446	185189692	AC079080.1	chr4	185557662	185568671	34	25	40	33
553577	chr4	185188446	185189692	AC079080.1	chr4	186106001	186113835	6	5	8	6.33333
282725	chr17	16978636	16983801	AC079111.1	chr17	16988246	16990532	263	209	175	215.667
398493	chr2	224263734	224266318	AC079120.1	chr2	224261125	224262453	303	88	84	158.333
402089	chr2	237072120	237077830	AC079135.1	chr2	237083864	237084652	291	191	166	216
367163	chr2	124782517	124786838	AC079154.1	chr2	124779856	124791415	596	232	190	339.333
399647	chr2	227987154	227989282	AC079235.1	chr2	227998096	228002687	152	82	77	103.667
399647	chr2	227987154	227989282	AC079235.1	chr2	228744245	228752266	5	7	4	5.33333
383979	chr2	178125221	178130928	AC079305.10	chr2	178121984	178124397	469	228	163	286.667
383979	chr2	178125221	178130928	AC079305.10	chr2	178412409	178415526	23	11	14	16
383979	chr2	178125221	178130928	AC079305.10	chr2	178619233	178621310	5	6	10	7
533539	chr4	122684930	122690839	AC079341.1	chr4	122695601	122695849	429	205	161	265
533539	chr4	122684930	122690839	AC079341.1	chr4	123836308	123851744	3	2	5	3.33333
391924	chr2	202934826	202940082	AC079354.1	chr2	202941183	202950556	121	82	121	108
391938	chr2	202980380	202985289	AC079354.3	chr2	202989826	202990008	471	277	245	331
346189	chr2	49285223	49292457	AC079394.1	chr2	49295409	49299595	381	123	105	203
575701	chr5	66758677	66760941	AC079467.1	chr5	66750725	66764709	696	151	288	378.333
575701	chr5	66758677	66760941	AC079467.1	chr5	67942287	67960931	11	5	7	7.66667
166800	chr12	83384835	83405777	AC079595.1	chr12	83381703	83381904	324	93	111	176
154748	chr12	43683570	43685885	AC079603.1	chr12	43677714	43689899	314	182	153	216.333
402930	chr2	240498105	240505607	AC079612.1	chr2	240489044	240492650	258	172	147	192.333
663027	chr7	6624508	6634263	AC079742.4	chr7	7599413	7604341	6	6	12	8
363819	chr2	113594484	113606655	AC079753.1	chr2	113585488	113592712	281	295	160	245.333
363819	chr2	113594484	113606655	AC079753.1	chr2	113867908	113887700	16	6	10	10.6667
332043	chr2	196807	199069	AC079779.7	chr2	193264	203680	125	131	65	107
375973	chr2	152951975	152959709	AC079790.2	chr2	152942869	152946610	182	115	124	140.333
685033	chr7	82975946	82984868	AC079799.2	chr7	82988136	82997004	249	36	46	110.333
345866	chr2	48130849	48134742	AC079807.2	chr2	48127343	48129564	441	355	350	382
345866	chr2	48130849	48134742	AC079807.2	chr2	48328329	48334603	107	47	49	67.6667
345866	chr2	48130849	48134742	AC079807.2	chr2	48552842	48565118	28	14	11	17.6667
345866	chr2	48130849	48134742	AC079807.2	chr2	48653874	48662848	43	19	22	28
397901	chr2	222383486	222389522	AC079834.1	chr2	222377224	222396365	295	90	55	146.667
256471	chr15	94623753	94628327	AC080032.1	chr15	93883614	93895352	13	10	16	13
256471	chr15	94623753	94628327	AC080032.1	chr15	94630701	94635390	671	219	230	373.333
295641	chr17	70708801	70720496	AC080037.1	chr17	70720509	70721412	284	146	116	182
391521	chr2	201449367	201453446	AC080164.1	chr2	201448050	201463014	533	245	319	365.667
391521	chr2	201449367	201453446	AC080164.1	chr2	202636519	202642062	6	6	7	6.33333
166559	chr12	82730993	82739612	AC083811.1	chr12	82740269	82745541	61	16	20	32.3333
522659	chr4	89410331	89420622	AC083829.1	chr4	88956369	88961752	36	17	22	25
522659	chr4	89410331	89420622	AC083829.1	chr4	89153357	89159039	97	18	21	45.3333
522659	chr4	89410331	89420622	AC083829.1	chr4	89405633	89420884	888	289	227	468
671366	chr7	33048075	33057448	AC083863.7	chr7	33058466	33059299	120	97	126	114.333
700071	chr7	132945812	132952366	AC083875.1	chr7	132759533	132763549	17	8	10	11.6667
700071	chr7	132945812	132952366	AC083875.1	chr7	132957355	132964254	294	101	126	173.667
700071	chr7	132945812	132952366	AC083875.1	chr7	133805493	133825236	9	7	11	9
701905	chr7	139065368	139075747	AC083883.1	chr7	139077083	139080112	482	192	191	288.333
701905	chr7	139065368	139075747	AC083883.1	chr7	140051108	140068538	15	8	8	10.3333
393663	chr2	208842013	208843327	AC083900.1	chr2	208625528	208630832	37	37	25	33
393663	chr2	208842013	208843327	AC083900.1	chr2	208834890	208841104	354	233	211	266
726383	chr8	67024487	67035306	AC084082.3	chr8	66749354	66758185	28	8	7	14.3333
726383	chr8	67024487	67035306	AC084082.3	chr8	67016525	67017807	120	88	56	88
750347	chr8	145659910	145665922	AC084125.4	chr8	145674891	145676334	65	128	101	98
466658	chr3	101393991	101404832	AC084198.1	chr3	101940192	101948027	7	5	9	7
466658	chr3	101393991	101404832	AC084198.1	chr3	102251135	102252938	12	7	4	7.66667
715698	chr8	29122859	29136730	AC084262.1	chr8	29116227	29119371	42	45	25	37.3333
689166	chr7	95932648	95940705	AC084368.1	chr7	95941830	95944635	660	213	200	357.667
689166	chr7	95932648	95940705	AC084368.1	chr7	96649926	96653662	10	6	3	6.33333
285412	chr17	31202849	31210495	AC084809.2	chr17	31108775	31120444	79	33	27	46.3333
285412	chr17	31202849	31210495	AC084809.2	chr17	31200163	31202799	268	234	196	232.667
243303	chr15	47534156	47536596	AC084882.1	chr15	47538175	47541120	448	241	268	319
672493	chr7	36680627	36688729	AC087069.1	chr7	36688740	36696508	473	171	186	276.667
672493	chr7	36680627	36688729	AC087069.1	chr7	37235481	37241195	29	8	27	21.3333
672493	chr7	36680627	36688729	AC087069.1	chr7	37901780	37910449	9	5	3	5.66667
147537	chr12	20125723	20126936	AC087237.1	chr12	20120707	20131467	410	121	180	237
243225	chr15	47245893	47254578	AC087433.1	chr15	47255982	47262204	61	24	15	33.3333
280628	chr17	9359412	9365360	AC087501.1	chr17	9369643	9378701	36	17	9	20.6667
296791	chr17	76267001	76276392	AC087645.1	chr17	76277529	76287799	36	24	37	32.3333
253705	chr15	84280779	84287446	AC087738.1	chr15	84277125	84277590	312	174	217	234.333
239229	chr15	33484018	33489091	AC090098.1	chr15	33491032	33492138	1004	536	481	673.667
715125	chr8	27005062	27005677	AC090150.1	chr8	27006817	27007455	624	310	320	418
715125	chr8	27005062	27005677	AC090150.1	chr8	27504577	27521407	6	3	3	4
721834	chr8	52724434	52732554	AC090186.1	chr8	52719419	52723562	115	35	57	69
303837	chr18	24166518	24173112	AC090206.1	chr18	24173212	24178396	194	88	98	126.667
279311	chr17	3123068	3134647	AC090282.1	chr17	3109107	3117407	92	21	23	45.3333
313771	chr18	55680797	55693307	AC090324.1	chr18	55675934	55693515	339	178	154	223.667
313771	chr18	55680797	55693307	AC090324.1	chr18	55785125	55796701	43	24	25	30.6667
712737	chr8	18666233	18668800	AC090420.1	chr8	18672215	18682853	445	63	185	231
745368	chr8	127151267	127154067	AC090573.1	chr8	127143190	127159190	115	41	44	66.6667
285236	chr17	30470057	30470999	AC090616.2	chr17	29634428	29639086	8	8	5	7
285236	chr17	30470057	30470999	AC090616.2	chr17	30466029	30466904	491	422	374	429
279109	chr17	2114048	2121936	AC090617.1	chr17	2107095	2107556	223	120	77	140
288929	chr17	46371490	46372886	AC090627.1	chr17	46362614	46367918	357	265	124	248.667
288929	chr17	46371490	46372886	AC090627.1	chr17	46668810	46680602	14	17	11	14
312165	chr18	50460944	50467526	AC090660.1	chr18	50475657	50476442	226	92	113	143.667
312537	chr18	51611202	51614655	AC090666.1	chr18	51615375	51622684	8	10	13	10.3333
161125	chr12	66251080	66251924	AC090673.1	chr12	65683890	65698494	8	4	7	6.33333
258212	chr15	100287393	100293370	AC090825.2	chr15	99642346	99660268	9	4	4	5.66667
258212	chr15	100287393	100293370	AC090825.2	chr15	100293926	100295205	145	106	62	104.333
440001	chr3	10522297	10523952	AC090841.1	chr3	10507859	10520144	396	256	103	251.667
441041	chr3	14689831	14693040	AC090952.5	chr3	14175754	14191804	22	43	12	25.6667
441041	chr3	14689831	14693040	AC090952.5	chr3	14680504	14695234	635	319	248	400.667
441041	chr3	14689831	14693040	AC090952.5	chr3	15123624	15131792	28	19	21	22.6667
441041	chr3	14689831	14693040	AC090952.5	chr3	15251383	15262233	22	8	7	12.3333
441077	chr3	14807934	14812919	AC090957.2	chr3	14805959	14807593	157	133	81	123.667
727486	chr8	70598964	70614892	AC091047.1	chr8	70592087	70597204	335	122	150	202.333
727486	chr8	70598964	70614892	AC091047.1	chr8	70984005	71000557	29	9	17	18.3333
256259	chr15	93959264	93963637	AC091078.1	chr15	93627079	93644371	19	8	7	11.3333
256259	chr15	93959264	93963637	AC091078.1	chr15	93971342	93972806	96	52	38	62
734812	chr8	93647524	93656142	AC091096.1	chr8	93660603	93663651	207	45	64	105.333
289089	chr17	47005121	47031529	AC091133.1	chr17	46992531	46996817	231	89	85	135
279604	chr17	4569753	4594037	AC091153.4	chr17	4560494	4562636	82	79	48	69.6667
284937	chr17	29283181	29285996	AC091177.1	chr17	29280475	29281754	48	54	43	48.3333
102620	chr11	1521441	1540827	AC091196.1	chr11	1223607	1228547	40	35	25	33.3333
102620	chr11	1521441	1540827	AC091196.1	chr11	1514200	1515740	226	131	115	157.333
304816	chr18	27057839	27064484	AC091321.1	chr18	27050677	27066715	449	93	139	227
567064	chr5	38814977	38822802	AC091435.2	chr5	38808907	38809379	87	31	38	52
711701	chr8	15379224	15379628	AC091559.1	chr8	14892818	14901561	7	5	5	5.66667
711701	chr8	15379224	15379628	AC091559.1	chr8	15375431	15378490	970	409	320	566.333
711701	chr8	15379224	15379628	AC091559.1	chr8	16615442	16633449	8	9	13	10
316449	chr18	64320625	64323102	AC091643.1	chr18	64313477	64320400	158	41	50	83
666794	chr7	18336829	18339704	AC091697.1	chr7	18345760	18346386	448	178	207	277.667
669124	chr7	25608722	25612226	AC091705.1	chr7	25293290	25313248	55	21	21	32.3333
669124	chr7	25608722	25612226	AC091705.1	chr7	25430460	25434134	32	12	23	22.3333
669124	chr7	25608722	25612226	AC091705.1	chr7	25614177	25614431	471	232	211	304.667
661967	chr7	1119003	1133678	AC091729.8	chr7	1139130	1142253	104	92	82	92.6667
661984	chr7	1197010	1200280	AC091729.9	chr7	1193385	1194266	311	286	178	258.333
700809	chr7	135479401	135491267	AC091736.1	chr7	135495387	135503002	351	112	159	207.333
700809	chr7	135479401	135491267	AC091736.1	chr7	135693962	135697836	154	124	158	145.333
700809	chr7	135479401	135491267	AC091736.1	chr7	136068774	136085525	8	4	7	6.33333
700785	chr7	135390691	135395993	AC091736.11	chr7	135404263	135406001	41	31	39	37
571745	chr5	54478208	54482382	AC091977.1	chr5	54473684	54487375	197	69	86	117.333
53317	chr1	211373677	211385428	AC092017.1	chr1	210760899	210776881	19	8	9	12
689222	chr7	96132429	96133386	AC092031.1	chr7	96133645	96141301	630	352	393	458.333
443863	chr3	23438751	23441692	AC092038.1	chr3	22773138	22777939	3	5	5	4.33333
443863	chr3	23438751	23441692	AC092038.1	chr3	23246590	23265156	27	17	21	21.6667
443863	chr3	23438751	23441692	AC092038.1	chr3	23430011	23435606	319	125	123	189
443863	chr3	23438751	23441692	AC092038.1	chr3	23859320	23875687	25	8	11	14.6667
449824	chr3	42466644	42470502	AC092047.1	chr3	42475359	42485265	458	124	258	280
449822	chr3	42460470	42464729	AC092048.1	chr3	42470503	42475358	232	132	123	162.333
323272	chr19	19548703	19569634	AC092067.1	chr19	19570513	19573885	81	78	54	71
330969	chr19	53784306	53793064	AC092070.1	chr19	53796416	53798714	215	74	80	123
278636	chr16	90000222	90008860	AC092143.1	chr16	89994441	89999725	62	57	58	59
350521	chr2	62886472	62890963	AC092155.4	chr2	62895523	62896333	525	205	238	322.667
332179	chr2	686044	694682	AC092159.3	chr2	281361	296239	5	3	7	5
332179	chr2	686044	694682	AC092159.3	chr2	695823	706156	294	202	125	207
6386	chr1	30113931	30119220	AC092265.1	chr1	30123753	30133110	83	145	102	110
324796	chr19	24176984	24192248	AC092279.1	chr19	24174560	24175164	412	157	128	232.333
324796	chr19	24176984	24192248	AC092279.1	chr19	24506306	24510088	5	3	2	3.33333
327837	chr19	37017641	37022231	AC092295.4	chr19	37010740	37013559	271	134	109	171.333
327837	chr19	37017641	37022231	AC092295.4	chr19	37329509	37340146	44	23	13	26.6667
327838	chr19	37022232	37029043	AC092295.5	chr19	37013560	37017640	107	31	15	51
327838	chr19	37022232	37029043	AC092295.5	chr19	37967085	37975115	9	4	3	5.33333
327847	chr19	37061433	37072661	AC092295.7	chr19	37058733	37059041	45	23	10	26
324554	chr19	23437350	23451255	AC092329.1	chr19	24093783	24102341	16	3	7	8.66667
278467	chr16	89001969	89011311	AC092384.1	chr16	89015142	89024679	322	287	211	273.333
496714	chr4	1194131	1197358	AC092535.1	chr4	1184661	1187853	72	75	56	67.6667
496703	chr4	1134385	1146135	AC092535.3	chr4	1147179	1147789	46	34	26	35.3333
510353	chr4	47559161	47563599	AC092597.3	chr4	47554004	47568904	180	85	74	113
548411	chr4	168824018	168830177	AC092621.1	chr4	168830913	168836363	149	60	55	88
367049	chr2	124434697	124450442	AC092646.1	chr2	124432789	124434289	273	64	68	135
373134	chr2	144410041	144420884	AC092652.1	chr2	144402973	144409908	41	5	5	17
360127	chr2	100718771	100723132	AC092667.2	chr2	100478055	100481221	12	8	7	9
360127	chr2	100718771	100723132	AC092667.2	chr2	100728261	100738044	96	85	63	81.3333
351685	chr2	66666185	66670392	AC092669.4	chr2	66664702	66676659	484	172	266	307.333
351685	chr2	66666185	66670392	AC092669.4	chr2	67619772	67631361	7	5	5	5.66667
359653	chr2	98968858	98974970	AC092675.3	chr2	98406864	98423694	17	4	23	14.6667
359653	chr2	98968858	98974970	AC092675.3	chr2	98967280	98967579	272	104	87	154.333
359653	chr2	98968858	98974970	AC092675.3	chr2	99160031	99173746	18	10	9	12.3333
334933	chr2	10729203	10730544	AC092687.5	chr2	10736127	10736754	138	74	67	93
275798	chr16	77743478	77758893	AC092724.1	chr16	77244588	77244972	9	6	6	7
275798	chr16	77743478	77758893	AC092724.1	chr16	78001587	78013090	39	15	18	24
275798	chr16	77743478	77758893	AC092724.1	chr16	78119712	78136297	11	15	10	12
247016	chr15	59507189	59510619	AC092756.1	chr15	59499816	59512680	303	158	80	180.333
247016	chr15	59507189	59510619	AC092756.1	chr15	59782483	59793310	36	30	27	31
246994	chr15	59443065	59446355	AC092757.1	chr15	58500533	58514530	3	4	3	3.33333
246994	chr15	59443065	59446355	AC092757.1	chr15	59450667	59458097	265	141	148	184.667
246994	chr15	59443065	59446355	AC092757.1	chr15	59793311	59805035	30	21	26	25.6667
56736	chr1	222186067	222186868	AC092765.1	chr1	222187082	222199320	133	109	60	100.667
370824	chr2	137402452	137404553	AC092786.1	chr2	137406493	137406979	657	310	273	413.333
57694	chr1	225596388	225605175	AC092811.1	chr1	225608267	225609348	532	180	201	304.333
57694	chr1	225596388	225605175	AC092811.1	chr1	225951977	225956693	34	16	15	21.6667
25848	chr1	96351954	96358269	AC092812.1	chr1	96361735	96364721	81	34	23	46
347983	chr2	54765447	54769186	AC092839.3	chr2	54771379	54774753	261	144	186	197
347986	chr2	54772738	54774404	AC092839.4	chr2	54774754	54780973	184	102	68	118
379159	chr2	162774454	162776434	AC092841.1	chr2	162766811	162783327	262	127	190	193
503268	chr4	24419783	24424102	AC092846.1	chr4	23137552	23141628	77	29	24	43.3333
503268	chr4	24419783	24424102	AC092846.1	chr4	24424440	24427540	824	209	228	420.333
503268	chr4	24419783	24424102	AC092846.1	chr4	25346858	25353287	9	3	4	5.33333
469150	chr3	109211192	109216733	AC092905.1	chr3	109206651	109208140	394	136	160	230
480834	chr3	147623803	147637757	AC092925.1	chr3	147639243	147644351	299	133	177	203
480894	chr3	147796068	147801751	AC092958.1	chr3	147791224	147805228	387	187	187	253.667
488729	chr3	172028675	172038648	AC092964.1	chr3	170881338	170886011	11	5	9	8.33333
488729	chr3	172028675	172038648	AC092964.1	chr3	172014327	172019217	312	101	141	184.667
487024	chr3	166739867	166750900	AC092965.1	chr3	166732185	166738167	430	87	122	213
475374	chr3	130087764	130088332	AC093004.1	chr3	130086451	130092052	1185	443	328	652
178711	chr12	125737810	125747583	AC093028.1	chr12	125748955	125750459	258	160	143	187
348032	chr2	54888688	54892284	AC093110.3	chr2	54759049	54771378	85	38	49	57.3333
348032	chr2	54888688	54892284	AC093110.3	chr2	54888027	54894395	851	308	449	536
348032	chr2	54888688	54892284	AC093110.3	chr2	55398977	55410623	48	13	13	24.6667
348032	chr2	54888688	54892284	AC093110.3	chr2	56088302	56101139	9	2	2	4.33333
357294	chr2	85520234	85532793	AC093162.1	chr2	85541865	85545274	60	29	31	40
400582	chr2	230989680	230999008	AC093171.1	chr2	231000602	231009701	289	88	100	159
593250	chr5	122111880	122113314	AC093267.1	chr5	122103672	122114734	428	376	392	398.667
593250	chr5	122111880	122113314	AC093267.1	chr5	122756093	122767115	20	18	15	17.6667
593250	chr5	122111880	122113314	AC093267.1	chr5	122843289	122860982	25	7	8	13.3333
606980	chr5	167292237	167300942	AC093304.1	chr5	167305328	167306177	268	90	155	171
584199	chr5	93913103	93917429	AC093311.1	chr5	93908820	93912720	325	99	98	174
370607	chr2	136741463	136749415	AC093391.2	chr2	136751533	136754653	44	34	34	37.3333
370607	chr2	136741463	136749415	AC093391.2	chr2	136862836	136876755	29	19	18	22
370607	chr2	136741463	136749415	AC093391.2	chr2	137134337	137141367	10	11	12	11
440914	chr3	14185108	14187206	AC093495.4	chr3	14184209	14184377	236	197	124	185.667
440914	chr3	14185108	14187206	AC093495.4	chr3	14680504	14689830	16	10	4	10
440914	chr3	14185108	14187206	AC093495.4	chr3	14978677	14992031	8	5	11	8
582923	chr5	89769063	89774911	AC093510.2	chr5	89779895	89781985	340	139	107	195.333
260411	chr16	7939645	7955930	AC093515.1	chr16	7956364	7956725	99	32	42	57.6667
24976	chr1	93446633	93461668	AC093577.1	chr1	93464463	93465960	454	183	233	290
403222	chr2	241949478	241961496	AC093585.6	chr2	241967796	241981793	292	112	158	187.333
440785	chr3	13687304	13698891	AC093611.1	chr3	13682949	13685814	55	70	36	53.6667
662823	chr7	5441213	5461830	AC093620.5	chr7	5470760	5471307	167	141	110	139.333
662823	chr7	5441213	5461830	AC093620.5	chr7	5728036	5735969	24	35	21	26.6667
527860	chr4	105411790	105414767	AC093628.1	chr4	105418099	105419716	425	212	219	285.333
702951	chr7	143072636	143081630	AC093673.5	chr7	143085174	143086268	92	120	73	95
528518	chr4	107332845	107343411	AC093680.1	chr4	107348141	107351759	127	59	63	83
340046	chr2	28533312	28534163	AC093690.1	chr2	28530219	28531234	249	153	122	174.667
681097	chr7	68525974	68529366	AC093693.1	chr7	68522728	68523306	476	184	204	288
545554	chr4	159919519	159928740	AC093700.1	chr4	159913681	159932250	289	112	57	152.667
706203	chr7	154718902	154726320	AC093726.6	chr7	154713714	154717565	380	139	136	218.333
706203	chr7	154718902	154726320	AC093726.6	chr7	155135835	155141842	61	24	39	41.3333
706203	chr7	154718902	154726320	AC093726.6	chr7	155380134	155386995	12	8	6	8.66667
706203	chr7	154718902	154726320	AC093726.6	chr7	155552531	155563953	13	5	5	7.66667
345607	chr2	47263467	47268906	AC093732.1	chr2	47269140	47288981	172	125	79	125.333
345607	chr2	47263467	47268906	AC093732.1	chr2	48011942	48015290	4	8	3	5
539110	chr4	139725605	139740674	AC093766.1	chr4	139723722	139724501	244	107	99	150
402976	chr2	240671838	240684830	AC093802.1	chr2	240688271	240689166	139	97	63	99.6667
545072	chr4	158506469	158509536	AC093817.1	chr4	158510854	158513586	62	19	15	32
550952	chr4	176663921	176671121	AC093819.1	chr4	176677122	176683250	216	60	68	114.667
395313	chr2	213625136	213630979	AC093865.1	chr2	213636364	213641002	342	75	66	161
395313	chr2	213625136	213630979	AC093865.1	chr2	214018498	214026297	10	7	6	7.66667
519280	chr4	79107742	79110300	AC093897.1	chr4	79101967	79113304	331	217	172	240
19847	chr1	77854739	77859422	AC095030.1	chr1	76538023	76552348	5	8	3	5.33333
19847	chr1	77854739	77859422	AC095030.1	chr1	77355851	77361735	5	4	7	5.33333
19847	chr1	77854739	77859422	AC095030.1	chr1	77851305	77863244	628	245	254	375.667
513708	chr4	61524272	61536848	AC095061.1	chr4	61537368	61538025	222	44	90	118.667
373072	chr2	144232410	144239878	AC096558.1	chr2	144226688	144231440	329	55	74	152.667
377575	chr2	157786571	157789208	AC096589.1	chr2	157780267	157790160	262	135	147	181.333
50334	chr1	200111191	200115077	AC096633.1	chr1	200119139	200125151	184	65	60	103
50334	chr1	200111191	200115077	AC096633.1	chr1	200459679	200469267	14	6	9	9.66667
55934	chr1	219561338	219575438	AC096642.1	chr1	218509082	218516400	18	9	6	11
55934	chr1	219561338	219575438	AC096642.1	chr1	219559014	219560903	321	97	133	183.667
55934	chr1	219561338	219575438	AC096642.1	chr1	219832648	219851918	31	8	14	17.6667
56017	chr1	219834718	219836813	AC096643.1	chr1	218498973	218509081	46	7	17	23.3333
56017	chr1	219834718	219836813	AC096643.1	chr1	219232088	219251878	22	7	7	12
56017	chr1	219834718	219836813	AC096643.1	chr1	219377316	219380807	53	23	29	35
56017	chr1	219834718	219836813	AC096643.1	chr1	219837930	219841565	823	267	209	433
51294	chr1	203964633	203970158	AC096645.1	chr1	203950830	203961979	324	104	111	179.667
383373	chr2	176193018	176199329	AC096649.1	chr2	176191525	176204912	637	78	220	311.667
350835	chr2	63919848	63925484	AC096664.1	chr2	63909821	63916529	208	54	103	121.667
350835	chr2	63919848	63925484	AC096664.1	chr2	64089509	64099006	66	74	34	58
386396	chr2	185464323	185473477	AC096667.1	chr2	185474929	185476261	725	166	248	379.667
386396	chr2	185464323	185473477	AC096667.1	chr2	185622924	185634767	42	23	19	28
363330	chr2	111872736	111883621	AC096670.3	chr2	111430721	111444942	17	13	6	12
363330	chr2	111872736	111883621	AC096670.3	chr2	111574535	111583733	55	20	28	34.3333
363330	chr2	111872736	111883621	AC096670.3	chr2	111884320	111886600	360	194	204	252.667
499451	chr4	12795948	12803998	AC096750.1	chr4	12804456	12807741	117	38	87	80.6667
457094	chr3	68678183	68687054	AC096922.1	chr3	68690230	68697551	325	84	66	158.333
457801	chr3	70926100	70934093	AC096971.1	chr3	70925240	70925618	307	147	146	200
452389	chr3	53241813	53245478	AC097015.1	chr3	53235357	53241366	215	168	144	175.667
445710	chr3	29049420	29053742	AC097361.1	chr3	29055408	29059116	356	123	111	196.667
541405	chr4	147043195	147043441	AC097372.1	chr4	147029877	147045186	156	418	326	300
541405	chr4	147043195	147043441	AC097372.1	chr4	147421972	147439005	12	10	7	9.66667
504236	chr4	27620878	27639303	AC097380.1	chr4	27618127	27618440	122	41	38	67
498125	chr4	7939815	7944483	AC097381.1	chr4	7947463	7947763	153	129	82	121.333
543187	chr4	152482037	152487206	AC097455.1	chr4	152472315	152479223	356	95	112	187.667
398350	chr2	223777367	223787348	AC097461.4	chr2	223553319	223569521	120	45	69	78
398350	chr2	223777367	223787348	AC097461.4	chr2	223771134	223776282	433	152	249	278
398350	chr2	223777367	223787348	AC097461.4	chr2	224328162	224334830	12	5	11	9.33333
544352	chr4	156273862	156277968	AC097467.2	chr4	155473803	155483818	30	8	9	15.6667
544352	chr4	156273862	156277968	AC097467.2	chr4	156270676	156271319	412	126	166	234.667
352440	chr2	69050828	69060264	AC097495.2	chr2	68680473	68697016	37	30	30	32.3333
352440	chr2	69050828	69060264	AC097495.2	chr2	69061155	69061460	454	282	284	340
550110	chr4	174189057	174189493	AC097534.1	chr4	173938624	173943479	64	38	27	43
550110	chr4	174189057	174189493	AC097534.1	chr4	174181415	174196639	400	193	137	243.333
388754	chr2	192782923	192787339	AC098617.1	chr2	192778100	192778520	73	63	34	56.6667
388741	chr2	192705523	192718847	AC098617.2	chr2	192419955	192431444	31	13	20	21.3333
388741	chr2	192705523	192718847	AC098617.2	chr2	192721161	192726826	253	128	114	165
450502	chr3	44823334	44834832	AC098649.1	chr3	44563246	44575605	4	4	6	4.66667
450502	chr3	44823334	44834832	AC098649.1	chr3	44808873	44812076	49	23	24	32
445857	chr3	29407562	29412112	AC098650.1	chr3	29415327	29421600	182	61	80	107.667
507595	chr4	38237905	38244524	AC098680.1	chr4	38681602	38695501	14	15	12	13.6667
24534	chr1	91851952	91860609	AC098691.1	chr1	92083685	92101757	11	5	7	7.66667
396529	chr2	217344416	217355616	AC098820.4	chr2	217342467	217343802	11	14	27	17.3333
499727	chr4	13656172	13660692	AC098830.1	chr4	13651684	13652793	24	14	15	17.6667
499727	chr4	13656172	13660692	AC098830.1	chr4	14782716	14800106	9	3	6	6
314281	chr18	57412470	57418000	AC098847.1	chr18	57418401	57428367	375	61	81	172.333
508169	chr4	40462512	40474955	AC098869.1	chr4	40477753	40478016	280	119	116	171.667
388725	chr2	192653057	192660372	AC098872.3	chr2	192416521	192431444	11	4	7	7.33333
388725	chr2	192653057	192660372	AC098872.3	chr2	192663020	192667031	95	29	22	48.6667
543547	chr4	153818551	153824482	AC099339.1	chr4	153813657	153815435	438	120	140	232.667
277230	chr16	82868141	82877186	AC099506.1	chr16	82865930	82866322	293	108	97	166
445202	chr3	27397888	27406909	AC099535.1	chr3	27407980	27408821	309	98	88	165
445202	chr3	27397888	27406909	AC099535.1	chr3	27710346	27721880	48	13	26	29
445202	chr3	27397888	27406909	AC099535.1	chr3	28014702	28027859	8	2	3	4.33333
446530	chr3	31435762	31437655	AC099540.1	chr3	31432798	31434332	567	408	220	398.333
455442	chr3	63318853	63324204	AC099545.1	chr3	63327080	63335279	417	128	150	231.667
455442	chr3	63318853	63324204	AC099545.1	chr3	63799448	63808193	47	19	35	33.6667
706283	chr7	154986672	154991769	AC099552.4	chr7	154984226	154985167	112	74	70	85.3333
63180	chr1	244744391	244757248	AC099757.1	chr1	244762038	244763461	650	179	285	371.333
63180	chr1	244744391	244757248	AC099757.1	chr1	245187759	245204831	39	5	21	21.6667
313531	chr18	54813047	54831932	AC100775.1	chr18	54812549	54812947	204	57	85	115.333
297078	chr17	77782841	77807007	AC100791.2	chr17	77772911	77773716	192	193	167	184
713153	chr8	19931874	19944876	AC100802.3	chr8	19732580	19734676	60	38	47	48.3333
713153	chr8	19931874	19944876	AC100802.3	chr8	19928804	19929280	449	147	214	270
749919	chr8	142516976	142519160	AC100803.1	chr8	142506248	142511549	32	44	23	33
723044	chr8	56588559	56591225	AC100817.1	chr8	55913963	55932445	6	4	3	4.33333
723044	chr8	56588559	56591225	AC100817.1	chr8	56580974	56581710	330	146	157	211
291938	chr17	57066082	57069739	AC100832.1	chr17	56780567	56793498	26	7	9	14
291938	chr17	57066082	57069739	AC100832.1	chr17	57062652	57062876	235	153	84	157.333
290175	chr17	51061277	51064056	AC102948.1	chr17	51053627	51070196	280	164	114	186
358796	chr2	95709112	95720490	AC103563.9	chr2	95705524	95707509	297	153	142	197.333
444689	chr3	25911297	25919877	AC103588.1	chr3	25685728	25689248	19	11	20	16.6667
720594	chr8	48792847	48810864	AC103686.1	chr8	47894835	47909712	11	5	7	7.66667
720594	chr8	48792847	48810864	AC103686.1	chr8	48790048	48791900	482	114	115	237
103314	chr11	4729406	4735188	AC103710.1	chr11	4724851	4725263	488	138	202	276
106788	chr11	16144657	16146562	AC103794.1	chr11	16139751	16151340	608	201	243	350.667
108823	chr11	22634465	22649497	AC103801.2	chr11	22651345	22655001	113	44	35	64
108823	chr11	22634465	22649497	AC103801.2	chr11	22844503	22850127	9	5	4	6
732162	chr8	85207952	85213374	AC103816.1	chr8	85203333	85206742	207	52	59	106
116607	chr11	48028349	48056146	AC103828.1	chr11	48058970	48068998	256	92	69	139
742170	chr8	117142014	117149562	AC103863.1	chr8	116687296	116697969	19	9	12	13.3333
742170	chr8	117142014	117149562	AC103863.1	chr8	117135908	117151753	547	217	245	336.333
742170	chr8	117142014	117149562	AC103863.1	chr8	117458306	117466443	31	9	13	17.6667
256406	chr15	94438428	94443402	AC103996.1	chr15	94434858	94436339	365	127	205	232.333
728184	chr8	72743513	72744958	AC104012.1	chr8	71576137	71578491	17	9	8	11.3333
728184	chr8	72743513	72744958	AC104012.1	chr8	71676714	71683379	5	3	5	4.33333
728184	chr8	72743513	72744958	AC104012.1	chr8	72747516	72752602	358	173	197	242.667
728184	chr8	72743513	72744958	AC104012.1	chr8	72882609	72902131	178	87	30	98.3333
728184	chr8	72743513	72744958	AC104012.1	chr8	73063942	73068860	38	33	9	26.6667
282710	chr17	16890665	16896704	AC104024.2	chr17	16435820	16446263	3	3	6	4
282710	chr17	16890665	16896704	AC104024.2	chr17	16877118	16884108	36	28	16	26.6667
385186	chr2	181844443	181846639	AC104076.3	chr2	180862527	180869848	24	29	28	27
385186	chr2	181844443	181846639	AC104076.3	chr2	180979151	180995035	18	14	12	14.6667
385186	chr2	181844443	181846639	AC104076.3	chr2	181402796	181412986	32	29	19	26.6667
385186	chr2	181844443	181846639	AC104076.3	chr2	181848447	181851474	492	500	417	469.667
385186	chr2	181844443	181846639	AC104076.3	chr2	182261020	182269194	21	11	14	15.3333
385186	chr2	181844443	181846639	AC104076.3	chr2	182332421	182333064	20	15	9	14.6667
385186	chr2	181844443	181846639	AC104076.3	chr2	182760659	182767597	31	18	15	21.3333
573565	chr5	60211231	60220325	AC104113.3	chr5	60220425	60222924	292	64	121	159
706483	chr7	155663991	155677017	AC104133.1	chr7	155677885	155678774	82	38	41	53.6667
358108	chr2	88836095	88845138	AC104134.2	chr2	88850388	88856616	287	97	99	161
22313	chr1	85258626	85259072	AC104169.1	chr1	85261612	85261989	453	161	123	245.667
744023	chr8	122648732	122658380	AC104233.1	chr8	122270505	122282094	26	10	7	14.3333
744023	chr8	122648732	122658380	AC104233.1	chr8	122644083	122661555	127	97	110	111.333
255894	chr15	92514852	92521622	AC104236.1	chr15	92523740	92528077	221	130	83	144.667
450978	chr3	46615946	46618741	AC104304.1	chr3	46300775	46311387	14	9	6	9.66667
734655	chr8	93179646	93180246	AC104339.1	chr8	93185666	93188052	90	165	14	89.6667
114564	chr11	40781068	40782918	AC104387.1	chr11	40772338	40778834	573	158	202	311
103466	chr11	5225324	5241469	AC104389.16	chr11	5217158	5218974	165	40	72	92.3333
369541	chr2	133277794	133288326	AC104405.1	chr2	133270336	133277337	369	115	118	200.667
750005	chr8	143021958	143030727	AC104417.1	chr8	143015715	143033360	213	146	193	184
450014	chr3	43250282	43252715	AC104434.1	chr3	43245388	43246365	438	264	238	313.333
450014	chr3	43250282	43252715	AC104434.1	chr3	43541838	43545011	45	17	36	32.6667
443138	chr3	21174454	21180242	AC104441.1	chr3	21167831	21173774	57	20	21	32.6667
27352	chr1	100838675	100845342	AC104457.1	chr1	100845608	100847052	54	13	18	28.3333
483367	chr3	155459208	155463682	AC104472.1	chr3	155453754	155470079	597	111	116	274.667
336695	chr2	16702524	16708458	AC104623.2	chr2	15773443	15783600	30	12	14	18.6667
336695	chr2	16702524	16708458	AC104623.2	chr2	16700363	16701990	549	264	302	371.667
336695	chr2	16702524	16708458	AC104623.2	chr2	16925810	16941043	55	49	54	52.6667
336695	chr2	16702524	16708458	AC104623.2	chr2	17481624	17488723	9	12	5	8.66667
361637	chr2	105717464	105731002	AC104655.2	chr2	105732500	105732703	296	162	158	205.333
402498	chr2	238498712	238509861	AC104667.3	chr2	238492805	238512274	225	60	101	128.667
339308	chr2	25639818	25653459	AC104699.1	chr2	25633899	25637987	272	106	127	168.333
348062	chr2	54971580	54977395	AC104781.1	chr2	54978516	54978670	627	307	293	409
334824	chr2	10223532	10224297	AC104794.4	chr2	10567000	10585659	46	36	53	45
403204	chr2	241841318	241867093	AC104809.3	chr2	241868587	241870565	399	171	146	238.667
403217	chr2	241897239	241906964	AC104809.4	chr2	241894323	241894884	57	48	26	43.6667
20214	chr1	79152520	79154652	AC104837.1	chr1	78606807	78612741	14	8	7	9.66667
20214	chr1	79152520	79154652	AC104837.1	chr1	79147051	79159356	476	85	141	234
116513	chr11	47598873	47600306	AC104942.1	chr11	47594561	47605995	371	263	182	272
357407	chr2	86038814	86043064	AC105053.3	chr2	86028953	86034087	250	176	108	178
357407	chr2	86038814	86043064	AC105053.3	chr2	86307338	86309564	82	70	81	77.6667
313918	chr18	56133335	56134967	AC105105.1	chr18	56126002	56140865	305	200	121	208.667
313918	chr18	56133335	56134967	AC105105.1	chr18	56402044	56421693	14	10	9	11
248735	chr15	65667181	65670844	AC105129.1	chr15	65360696	65370950	10	10	13	11
248735	chr15	65667181	65670844	AC105129.1	chr15	65658787	65661148	291	231	174	232
304733	chr18	26776373	26778544	AC105245.1	chr18	26772775	26774159	47	29	9	28.3333
550092	chr4	174098090	174109628	AC105285.1	chr4	173941775	173943479	39	18	38	31.6667
550092	chr4	174098090	174109628	AC105285.1	chr4	174094392	174095437	499	205	234	312.667
550092	chr4	174098090	174109628	AC105285.1	chr4	175035202	175041059	9	4	5	6
545658	chr4	160214977	160218478	AC105316.1	chr4	160210017	160212922	322	149	155	208.667
340248	chr2	29320296	29330046	AC105398.3	chr2	29330875	29336316	197	66	69	110.667
374895	chr2	149637499	149652244	AC105402.4	chr2	149657894	149658134	214	75	88	125.667
401011	chr2	232861098	232882131	AC105461.1	chr2	232855342	232859104	486	99	135	240
402342	chr2	237963367	237973252	AC105760.3	chr2	237257940	237272999	35	18	14	22.3333
402342	chr2	237963367	237973252	AC105760.3	chr2	237422210	237425836	51	31	28	36.6667
402342	chr2	237963367	237973252	AC105760.3	chr2	237962062	237974862	233	145	135	171
50055	chr1	199165329	199171424	AC105941.1	chr1	199158506	199173694	408	147	227	260.667
495696	chr3	194812046	194817485	AC106705.2	chr3	194400760	194403841	64	37	37	46
495696	chr3	194812046	194817485	AC106705.2	chr3	194817496	194826091	295	121	223	213
482217	chr3	151979492	151989579	AC106722.1	chr3	151588730	151607627	5	7	7	6.33333
482217	chr3	151979492	151989579	AC106722.1	chr3	151971381	151975956	342	197	244	261
577774	chr5	73565188	73569384	AC106732.1	chr5	73192287	73205872	22	13	16	17
273976	chr16	71361756	71371750	AC106736.1	chr16	71377005	71377261	196	92	103	130.333
603662	chr5	156984006	156994058	AC106801.1	chr5	156981351	156981872	70	51	41	54
546200	chr4	161923883	161926537	AC106860.1	chr4	161926932	161931458	81	13	19	37.6667
340491	chr2	30111991	30114675	AC106870.1	chr2	30105861	30119514	321	133	106	186.667
340496	chr2	30121640	30123897	AC106870.2	chr2	30119515	30124864	527	190	188	301.667
695116	chr7	116604326	116608061	AC106873.4	chr7	116608815	116619445	481	206	134	273.667
695116	chr7	116604326	116608061	AC106873.4	chr7	116754709	116766874	50	23	27	33.3333
695116	chr7	116604326	116608061	AC106873.4	chr7	117813895	117833166	4	3	3	3.33333
401269	chr2	233876686	233877947	AC106876.2	chr2	233882279	233885650	372	258	230	286.667
401269	chr2	233876686	233877947	AC106876.2	chr2	234163289	234173599	20	17	15	17.3333
179701	chr12	129149066	129161674	AC107020.1	chr12	129164450	129167142	249	85	111	148.333
480240	chr3	145779886	145782471	AC107021.1	chr3	145789724	145790768	335	140	187	220.667
480240	chr3	145779886	145782471	AC107021.1	chr3	146304193	146314706	18	6	10	11.3333
510490	chr4	47974062	47978426	AC107068.1	chr4	47962449	47971200	243	25	38	102
350298	chr2	62094729	62096825	AC107081.5	chr2	62092775	62104530	287	123	93	167.667
350298	chr2	62094729	62096825	AC107081.5	chr2	62638537	62641201	12	10	7	9.66667
741272	chr8	114414939	114421691	AC107890.1	chr8	114425706	114428967	49	16	22	29
287675	chr17	40543687	40554702	AC107993.1	chr17	40477331	40487053	104	73	85	87.3333
278766	chr17	262444	263865	AC108004.3	chr17	290033	293664	54	57	46	52.3333
278766	chr17	262444	263865	AC108004.3	chr17	601985	612288	95	77	73	81.6667
251126	chr15	74180278	74184835	AC108137.1	chr15	74185767	74199346	208	94	85	129
512044	chr4	56135731	56139818	AC108209.1	chr4	56140067	56141015	226	118	90	144.667
544649	chr4	157215059	157219250	AC108211.1	chr4	157223018	157227694	433	104	174	237
332335	chr2	1345434	1350653	AC108462.1	chr2	1351836	1353661	236	139	90	155
363370	chr2	111993002	112000145	AC108463.1	chr2	111988556	112002961	120	144	117	127
462089	chr3	84339096	84348796	AC108696.1	chr3	84349649	84353537	267	116	181	188
464946	chr3	96151680	96157352	AC108697.1	chr3	96146339	96148464	164	45	59	89.3333
464867	chr3	95878375	95902979	AC108739.1	chr3	95903387	95908156	188	41	77	102
250420	chr15	71766077	71779026	AC108861.1	chr15	71779303	71781180	144	55	49	82.6667
554364	chr4	187778610	187781422	AC108865.1	chr4	187775143	187784274	423	129	85	212.333
537959	chr4	136291196	136294250	AC108867.1	chr4	136288570	136294772	820	275	309	468
102897	chr11	3245576	3248332	AC109309.4	chr11	3250248	3257566	195	147	152	164.667
311655	chr18	48917605	48919292	AC109315.1	chr18	48923442	48925594	23	21	13	19
287833	chr17	41369970	41383064	AC109326.1	chr17	41367709	41368355	207	105	71	127.667
504897	chr4	29751237	29752632	AC109351.1	chr4	29738273	29751042	265	121	120	168.667
533933	chr4	123925124	123929327	AC109357.1	chr4	123929820	123935202	32	13	12	19
573410	chr5	59724641	59730170	AC109486.1	chr5	59731899	59733636	544	229	217	330
580803	chr5	83267748	83271718	AC109496.1	chr5	83272168	83274518	338	97	132	189
445563	chr3	28614815	28621005	AC109586.1	chr3	28607340	28624455	622	128	189	313
297372	chr17	79371698	79373802	AC110285.1	chr17	79364206	79381224	290	318	193	267
511666	chr4	54965701	54970271	AC110298.1	chr4	54053482	54061768	13	5	4	7.33333
511666	chr4	54965701	54970271	AC110298.1	chr4	54238274	54249503	8	6	5	6.33333
511666	chr4	54965701	54970271	AC110298.1	chr4	54778558	54785060	16	20	22	19.3333
511666	chr4	54965701	54970271	AC110298.1	chr4	54959780	54960667	291	183	143	205.667
465380	chr3	97540233	97541685	AC110491.1	chr3	97536004	97537941	194	282	285	253.667
465380	chr3	97540233	97541685	AC110491.1	chr3	98480639	98491601	10	11	8	9.66667
465380	chr3	97540233	97541685	AC110491.1	chr3	98611028	98617767	8	3	4	5
512245	chr4	56793047	56801123	AC110611.1	chr4	57861195	57866090	9	5	4	6
364136	chr2	114746134	114749226	AC110769.1	chr2	114743391	114750816	710	326	334	456.667
662075	chr7	1881075	1888085	AC110781.5	chr7	1889057	1902380	112	114	152	126
542917	chr4	151559524	151562309	AC110813.1	chr4	151563504	151564996	309	121	71	167
296612	chr17	75437247	75443481	AC111170.2	chr17	75433935	75453439	393	442	283	372.667
296608	chr17	75420227	75431898	AC111170.3	chr17	75433935	75436614	164	160	109	144.333
571624	chr5	54146426	54152522	AC112198.1	chr5	52750344	52765393	8	8	3	6.33333
571624	chr5	54146426	54152522	AC112198.1	chr5	54153346	54161925	195	101	79	125
458242	chr3	72310003	72312584	AC112219.1	chr3	72307422	72315615	505	460	335	433.333
518713	chr4	77413695	77421053	AC112249.1	chr4	77082679	77098714	27	18	16	20.3333
518713	chr4	77413695	77421053	AC112249.1	chr4	77410831	77423906	586	191	214	330.333
518713	chr4	77413695	77421053	AC112249.1	chr4	77681095	77681617	37	13	16	22
484822	chr3	159941781	159946589	AC112641.1	chr3	159936929	159938824	580	220	269	356.333
256227	chr15	93827543	93831528	AC112693.1	chr15	93831954	93834057	105	65	48	72.6667
402407	chr2	238165570	238166755	AC112715.2	chr2	237598853	237618507	10	10	7	9
402407	chr2	238165570	238166755	AC112715.2	chr2	238158032	238163112	436	354	249	346.333
402461	chr2	238332414	238337544	AC112721.1	chr2	238338312	238346755	277	187	168	210.667
792153	chrX	25224260	25224756	AC112778.1	chrX	25228732	25230177	144	44	50	79.3333
719735	chr8	42946616	42950941	AC113191.1	chr8	42952052	42960535	689	191	237	372.333
719735	chr8	42946616	42950941	AC113191.1	chr8	43303139	43305659	23	18	8	16.3333
565619	chr5	34524205	34527732	AC114302.1	chr5	34523009	34523845	311	194	148	217.667
565619	chr5	34524205	34527732	AC114302.1	chr5	34877861	34893785	29	11	14	18
29638	chr1	107988292	107992191	AC114491.1	chr1	107987092	107997464	220	174	95	163
29664	chr1	108107960	108117229	AC114491.2	chr1	108101949	108105522	413	134	134	227
54405	chr1	215061912	215066242	AC114496.1	chr1	215056369	215058733	150	40	38	76
239795	chr15	35268876	35270916	AC114546.1	chr15	35266887	35268545	255	135	120	170
403356	chr2	242662180	242678739	AC114730.11	chr2	242679671	242684947	143	108	99	116.667
403369	chr2	242751360	242773821	AC114730.3	chr2	242774857	242775643	231	88	75	131.333
403360	chr2	242687424	242697786	AC114730.7	chr2	242679671	242684947	109	83	101	97.6667
352615	chr2	69681751	69695641	AC114772.1	chr2	69698626	69701094	461	123	215	266.333
402812	chr2	239893547	239896559	AC114788.1	chr2	239897341	239897561	326	203	148	225.667
397265	chr2	220160298	220164682	AC114803.3	chr2	219908350	219924072	14	17	10	13.6667
397265	chr2	220160298	220164682	AC114803.3	chr2	220131719	220133862	59	45	41	48.3333
332263	chr2	1060315	1064661	AC114808.3	chr2	1058457	1066416	543	248	231	340.667
445016	chr3	26792275	26802542	AC114877.1	chr3	26804274	26805716	653	156	250	353
568551	chr5	43185152	43196278	AC114947.1	chr5	43180409	43184686	62	40	34	45.3333
7424	chr1	34640946	34643851	AC115286.1	chr1	34637702	34640428	297	181	123	200.333
448767	chr3	38944444	38951566	AC116038.1	chr3	38940475	38942365	133	46	42	73.6667
448724	chr3	38841385	38841899	AC116038.2	chr3	38842218	38842942	909	530	397	612
735728	chr8	96689854	96691658	AC116154.1	chr8	96684256	96694707	51	32	17	33.3333
577435	chr5	72449259	72453718	AC116345.1	chr5	72455865	72456323	27	11	13	17
596348	chr5	131758776	131769186	AC116366.5	chr5	131778587	131781009	292	173	141	202
596357	chr5	131802698	131812303	AC116366.6	chr5	130872356	130883969	2	2	3	2.33333
596357	chr5	131802698	131812303	AC116366.6	chr5	131814628	131819987	261	208	179	216
107092	chr11	17091057	17100015	AC116533.1	chr11	15825486	15841976	6	5	7	6
107092	chr11	17091057	17100015	AC116533.1	chr11	16808632	16821083	59	38	44	47
107092	chr11	17091057	17100015	AC116533.1	chr11	17100692	17115460	169	63	63	98.3333
107092	chr11	17091057	17100015	AC116533.1	chr11	17521243	17537451	6	4	5	5
267020	chr16	35115511	35139004	AC116553.1	chr16	35100588	35105222	90	26	35	50.3333
332229	chr2	940123	949577	AC116614.1	chr2	954226	954884	256	93	75	141.333
473766	chr3	123780446	123789572	AC117401.1	chr3	123774796	123779178	308	105	144	185.667
491683	chr3	181417166	181417570	AC117415.1	chr3	181410766	181425122	446	157	128	243.667
491683	chr3	181417166	181417570	AC117415.1	chr3	181972813	181980301	7	3	2	4
491683	chr3	181417166	181417570	AC117415.1	chr3	182395842	182402550	24	13	27	21.3333
465027	chr3	96384810	96387175	AC117444.1	chr3	96378993	96381731	187	85	70	114
328553	chr19	40699298	40714988	AC118344.2	chr19	40694580	40696027	29	32	18	26.3333
471204	chr3	115399992	115402594	AC119795.1	chr3	114932750	114950399	31	4	14	16.3333
727745	chr8	71482697	71503116	AC120194.1	chr8	71508116	71508285	103	40	44	62.3333
526472	chr4	101043625	101058516	AC121157.1	chr4	101059184	101062535	113	36	41	63.3333
475606	chr3	130826902	130837187	AC121332.1	chr3	130819029	130824394	227	64	60	117
153499	chr12	39829256	39837434	AC121334.1	chr12	39816546	39827033	107	68	95	90
153607	chr12	40199842	40205192	AC121336.1	chr12	40207519	40208088	52	19	17	29.3333
282869	chr17	17672846	17689360	AC122129.3	chr17	17698134	17699250	58	70	39	55.6667
396347	chr2	216741724	216744901	AC122136.1	chr2	216315515	216321252	12	5	8	8.33333
396347	chr2	216741724	216744901	AC122136.1	chr2	216739741	216745780	188	125	47	120
718766	chr8	39416581	39423158	AC123767.1	chr8	39413384	39413779	306	58	88	150.667
676389	chr7	50411807	50412756	AC124014.1	chr7	50244781	50254999	41	30	31	34
676389	chr7	50411807	50412756	AC124014.1	chr7	50415143	50415515	290	175	137	200.667
403078	chr2	241200117	241204178	AC124861.1	chr2	239920542	239935264	14	9	11	11.3333
403078	chr2	241200117	241204178	AC124861.1	chr2	241206747	241207818	726	261	248	411.667
392370	chr2	204626738	204632016	AC125238.1	chr2	204620867	204640270	59	62	40	53.6667
392370	chr2	204626738	204632016	AC125238.1	chr2	204768342	204781409	19	15	8	14
247930	chr15	62526730	62549847	AC126323.2	chr15	62039295	62051920	5	2	2	3
247930	chr15	62526730	62549847	AC126323.2	chr15	62518015	62521202	147	57	38	80.6667
297302	chr17	78971085	78980823	AC127496.1	chr17	78980928	78981412	55	60	53	56
297311	chr17	78997936	79010374	AC127496.3	chr17	79013530	79016605	88	100	71	86.3333
162203	chr12	69591231	69599811	AC127894.1	chr12	69588436	69589064	51	31	13	31.6667
264357	chr16	23763840	23767231	AC130454.2	chr16	23769479	23770291	604	348	282	411.333
264357	chr16	23763840	23767231	AC130454.2	chr16	24041772	24051758	22	19	13	18
264357	chr16	23763840	23767231	AC130454.2	chr16	24268490	24269367	17	13	14	14.6667
273257	chr16	68089122	68097049	AC130462.1	chr16	68085697	68105232	89	36	56	60.3333
550880	chr4	176387041	176398020	AC131094.1	chr4	176401618	176404018	296	88	114	166
403380	chr2	242843557	242848582	AC131097.4	chr2	242835906	242836815	85	87	57	76.3333
492276	chr3	183516859	183523613	AC131160.1	chr3	183188664	183201157	17	8	9	11.3333
715909	chr8	29786004	29791167	AC131254.1	chr8	29777174	29794987	73	37	25	45
102863	chr11	3000649	3011328	AC131971.1	chr11	3016899	3022351	133	57	49	79.6667
102853	chr11	2965308	2972282	AC131971.3	chr11	2956184	2962789	365	250	316	310.333
274477	chr16	73016384	73022136	AC132068.1	chr16	72523979	72534216	9	6	5	6.66667
274477	chr16	73016384	73022136	AC132068.1	chr16	73013469	73013701	694	427	397	506
272921	chr16	66519353	66529046	AC132186.2	chr16	66546867	66558705	119	72	62	84.3333
599899	chr5	144574693	144585068	AC132803.1	chr5	145152648	145170750	6	3	4	4.33333
387834	chr2	189955317	189968416	AC133106.2	chr2	189979333	189982695	50	26	20	32
403352	chr2	242628915	242646304	AC133528.2	chr2	242252083	242265044	33	12	25	23.3333
403352	chr2	242628915	242646304	AC133528.2	chr2	242623036	242628846	175	84	74	111
457589	chr3	70298072	70302999	AC134025.1	chr3	70294494	70305578	152	61	62	91.6667
719888	chr8	43414177	43418398	AC134698.1	chr8	42932760	42944970	5	4	4	4.33333
719888	chr8	43414177	43418398	AC134698.1	chr8	43418841	43424150	212	169	136	172.333
266023	chr16	31072183	31083126	AC135050.1	chr16	31440442	31440984	18	18	16	17.3333
280375	chr17	8220854	8222465	AC135178.7	chr17	8223703	8230101	412	231	197	280
710906	chr8	12807448	12809754	AC135352.1	chr8	12805189	12807242	138	95	74	102.333
710902	chr8	12800533	12804685	AC135352.2	chr8	12805189	12807242	381	121	151	217.667
710902	chr8	12800533	12804685	AC135352.2	chr8	13515544	13529923	10	4	8	7.33333
285044	chr17	29701174	29707014	AC135724.1	chr17	29709316	29713800	619	350	400	456.333
285044	chr17	29701174	29707014	AC135724.1	chr17	30177316	30184497	45	22	10	25.6667
266793	chr16	34255114	34258726	AC135776.1	chr16	34265823	34266208	440	228	162	276.667
443791	chr3	23241132	23244119	AC135966.1	chr3	23233940	23246589	68	42	15	41.6667
163768	chr12	74292225	74298847	AC136188.1	chr12	74287974	74291699	182	50	65	99
718830	chr8	39611518	39615112	AC136365.1	chr8	39619621	39622140	173	91	59	107.667
237583	chr15	27393597	27407391	AC136896.1	chr15	27409684	27411227	566	153	224	314.333
278444	chr16	88792685	88818896	AC138028.1	chr16	88820275	88824029	21	22	17	20
170146	chr12	93474916	93491944	AC138123.1	chr12	93175895	93177435	10	3	4	5.66667
288181	chr17	43306627	43324157	AC138150.4	chr17	43326206	43328870	263	223	155	213.667
749920	chr8	142519161	142530635	AC138647.1	chr8	142533079	142534409	295	144	115	184.667
345737	chr2	47746353	47755683	AC138655.4	chr2	47757161	47760551	206	119	108	144.333
345732	chr2	47714155	47716465	AC138655.6	chr2	48243326	48251518	13	9	9	10.3333
496640	chr4	735083	759154	AC139887.4	chr4	761564	763811	86	41	26	51
162180	chr12	69506135	69511963	AC139931.1	chr12	69254327	69268433	11	8	7	8.66667
162180	chr12	69506135	69511963	AC139931.1	chr12	69495670	69503971	75	64	72	70.3333
561665	chr5	21733658	21735868	AC140132.1	chr5	21729702	21738946	119	11	23	51
518109	chr4	75513396	75516680	AC142293.3	chr4	75505063	75513147	234	78	130	147.333
375142	chr2	150438437	150444007	AC144449.1	chr2	149876278	149885437	23	11	13	15.6667
375142	chr2	150438437	150444007	AC144449.1	chr2	150011500	150021721	13	6	15	11.3333
375142	chr2	150438437	150444007	AC144449.1	chr2	150433143	150438121	227	80	93	133.333
375142	chr2	150438437	150444007	AC144449.1	chr2	151762031	151767627	13	3	5	7
332394	chr2	1603355	1625382	AC144450.1	chr2	1629935	1633376	293	127	146	188.667
175312	chr12	111066104	111084198	AC144522.1	chr12	111094654	111095755	170	93	110	124.333
661852	chr7	228327	300135	AC145676.2	chr7	217781	222227	43	40	28	37
174989	chr12	109423896	109436516	AC190387.1	chr12	109355383	109367923	5	6	4	5
288305	chr17	43919210	43926368	AC217771.1	chr17	43706838	43726081	41	37	19	32.3333
180718	chr12	133806495	133823409	AC226150.2	chr12	133487880	133503811	18	17	15	16.6667
350892	chr2	64104232	64112794	ACA59.1	chr2	63909821	63919847	17	9	5	10.3333
350892	chr2	64104232	64112794	ACA59.1	chr2	64100307	64103426	152	76	57	95
384599	chr2	179886965	179893096	ACA59.2	chr2	179881264	179896296	781	150	192	374.333
135969	chr11	114996110	115001315	ACA59.3	chr11	114635619	114655553	3	5	2	3.33333
261414	chr16	12389969	12395540	ACA64.1	chr16	12396786	12398066	797	354	326	492.333
807565	chrX	80101741	80119843	ACA64.4	chrX	80091026	80101079	22	10	12	14.6667
809917	chrX	87399841	87404097	ACA64.5	chrX	87398324	87399455	216	63	87	122
448541	chr3	38172857	38183749	ACAA1	chr3	38169828	38170452	253	181	134	189.333
448541	chr3	38172857	38183749	ACAA1	chr3	38524567	38527290	19	10	13	14
311213	chr18	47339155	47341273	ACAA2	chr18	47013800	47015163	68	79	65	70.6667
311213	chr18	47339155	47341273	ACAA2	chr18	47336580	47349099	883	263	432	526
286629	chr17	35760663	35771365	ACACA	chr17	35780172	35780940	163	140	137	146.667
286629	chr17	35760663	35771365	ACACA	chr17	35964368	35968638	15	13	9	12.3333
476133	chr3	132377167	132380058	ACAD11	chr3	132252559	132259525	81	44	35	53.3333
476133	chr3	132377167	132380058	ACAD11	chr3	132372187	132385478	325	190	161	225.333
475027	chr3	128591280	128602186	ACAD9	chr3	128573555	128574568	40	40	31	37
394427	chr2	211086927	211091873	ACADL	chr2	210824053	210833766	32	13	22	22.3333
394427	chr2	211086927	211091873	ACADL	chr2	211096523	211099810	161	131	103	131.667
177815	chr12	121162947	121185293	ACADS	chr12	121149783	121158544	264	168	190	207.333
280191	chr17	7114907	7125387	ACADVL	chr17	6941133	6942623	71	60	34	55
280191	chr17	7114907	7125387	ACADVL	chr17	7131682	7133291	395	337	243	325
255103	chr15	89345586	89351106	ACAN	chr15	89341277	89342888	212	135	105	150.667
495785	chr3	195162417	195166617	ACAP2	chr3	194392600	194403841	32	27	19	26
495785	chr3	195162417	195166617	ACAP2	chr3	194591883	194603890	12	8	8	9.33333
495785	chr3	195162417	195166617	ACAP2	chr3	195150991	195161326	784	304	251	446.333
133868	chr11	107982760	107992465	ACAT1	chr11	107978488	107981000	533	226	200	319.667
133868	chr11	107982760	107992465	ACAT1	chr11	108524330	108526967	36	19	10	21.6667
658650	chr6	160181052	160182218	ACAT2	chr6	160163147	160172762	250	180	205	211.667
658650	chr6	160181052	160182218	ACAT2	chr6	160381277	160397627	27	34	10	23.6667
57891	chr1	226364150	226376557	ACBD3	chr1	226377433	226384835	304	163	184	217
72272	chr10	27524501	27534566	ACBD5	chr10	26724006	26735849	5	4	3	4
72272	chr10	27524501	27534566	ACBD5	chr10	27018727	27028529	8	3	3	4.66667
44154	chr1	180471076	180472609	ACBD6	chr1	180210059	180226408	52	39	23	38
44154	chr1	180471076	180472609	ACBD6	chr1	180464624	180475113	684	464	362	503.333
44154	chr1	180471076	180472609	ACBD6	chr1	180828529	180838320	79	41	40	53.3333
44154	chr1	180471076	180472609	ACBD6	chr1	181120939	181131987	57	16	37	36.6667
68596	chr10	15129208	15136019	ACBD7	chr10	13920181	13930925	9	3	6	6
68596	chr10	15129208	15136019	ACBD7	chr10	14228517	14241983	8	3	4	5
68596	chr10	15129208	15136019	ACBD7	chr10	15115866	15117168	269	120	143	177.333
285779	chr17	32480180	32487023	ACCN1	chr17	32099022	32108258	65	32	27	41.3333
285779	chr17	32480180	32487023	ACCN1	chr17	32476548	32478654	831	373	392	532
285779	chr17	32480180	32487023	ACCN1	chr17	32674539	32683452	62	29	28	39.6667
544517	chr4	156786207	156789057	ACCN5	chr4	156780779	156785997	114	24	22	53.3333
115636	chr11	44087024	44098121	ACCS	chr11	44084665	44103407	170	63	45	92.6667
115628	chr11	44068373	44071468	ACCSL	chr11	44062384	44078763	272	142	182	198.667
273170	chr16	67684481	67698216	ACD	chr16	66562291	66575740	6	3	2	3.66667
273170	chr16	67684481	67698216	ACD	chr16	67672322	67674057	284	232	152	222.667
293068	chr17	61548609	61558823	ACE	chr17	61524925	61538321	90	65	70	75
789319	chrX	15618031	15622794	ACE2	chrX	15614987	15626418	228	142	83	151
123873	chr11	76566181	76584526	ACER3	chr11	76584621	76591276	522	170	197	296.333
211384	chr14	23564580	23570049	ACIN1	chr14	22894845	22901751	11	10	8	9.66667
211384	chr14	23564580	23570049	ACIN1	chr14	23550488	23559305	347	210	174	243.667
370315	chr2	135596054	135596900	ACMSD	chr2	135595006	135596020	637	339	274	416.667
689404	chr7	96743050	96746650	ACN9	chr7	95534013	95540878	10	10	4	8
689404	chr7	96743050	96746650	ACN9	chr7	95940706	95944635	15	9	4	9.33333
689404	chr7	96743050	96746650	ACN9	chr7	96328824	96335276	9	6	8	7.66667
689404	chr7	96743050	96746650	ACN9	chr7	96755483	96761066	143	69	79	97
689404	chr7	96743050	96746650	ACN9	chr7	97476503	97477940	26	19	22	22.3333
760862	chr9	32382623	32396972	ACO1	chr9	32375202	32376557	169	73	80	107.333
760862	chr9	32382623	32396972	ACO1	chr9	32564825	32572016	64	31	40	45
760862	chr9	32382623	32396972	ACO1	chr9	32972044	32976549	34	13	17	21.3333
434973	chr22	41864756	41866344	ACO2	chr22	40568702	40576738	8	3	6	5.66667
434973	chr22	41864756	41866344	ACO2	chr22	41253799	41257932	48	12	18	26
434973	chr22	41864756	41866344	ACO2	chr22	41859795	41864683	520	420	265	401.667
12664	chr1	55000713	55017339	ACOT11	chr1	55023640	55025979	11	14	13	12.6667
579934	chr5	80686668	80693147	ACOT12	chr5	80681807	80698250	270	116	95	160.333
791762	chrX	23759553	23804082	ACOT9	chrX	23913906	23922073	64	43	24	43.6667
363233	chr2	111488837	111492524	ACOXL	chr2	111485191	111495462	422	271	203	298.667
332065	chr2	262406	274455	ACP1	chr2	261892	262247	244	117	129	163.333
322057	chr19	11685539	11691178	ACP5	chr19	11670327	11682470	95	84	51	76.6667
34692	chr1	147138865	147143119	ACP6	chr1	147138009	147138770	355	216	151	240.667
34692	chr1	147138865	147143119	ACP6	chr1	147364472	147382975	15	10	9	11.3333
478658	chr3	140945205	140948298	ACPL2	chr3	140954294	140955409	128	82	88	99.3333
476015	chr3	132028649	132048569	ACPP	chr3	132049872	132052109	324	86	92	167.333
476015	chr3	132028649	132048569	ACPP	chr3	132211229	132211766	11	12	12	11.6667
804890	chrX	70795538	70801743	ACRC	chrX	70782235	70786089	68	47	39	51.3333
138900	chr11	125550752	125552321	ACRV1	chr11	125552385	125553682	58	29	30	39
252179	chr15	78498248	78537992	ACSBG1	chr15	78488049	78494869	47	49	29	41.6667
321232	chr19	6126548	6136182	ACSBG2	chr19	6116890	6120225	210	158	129	165.667
289407	chr17	48499931	48505215	ACSF2	chr17	48506623	48511723	450	238	218	302
278485	chr16	89154236	89165493	ACSF3	chr16	89165897	89169428	75	76	65	72
553738	chr4	185746200	185769431	ACSL1	chr4	185771069	185771920	562	355	368	428.333
398337	chr2	223725185	223727564	ACSL3	chr2	223716915	223733934	394	135	152	227
398337	chr2	223725185	223727564	ACSL3	chr2	224328162	224334830	13	7	11	10.3333
96589	chr10	114130957	114134676	ACSL5	chr10	113940513	113953163	5	10	6	7
96589	chr10	114130957	114134676	ACSL5	chr10	114135171	114139581	67	76	71	71.3333
263559	chr16	20708093	20710422	ACSM1	chr16	20402099	20403851	17	13	12	14
263559	chr16	20708093	20710422	ACSM1	chr16	20703799	20707676	766	450	262	492.667
263559	chr16	20708093	20710422	ACSM1	chr16	21302864	21321027	10	3	4	5.66667
263577	chr16	20775177	20776937	ACSM3	chr16	20906100	20917238	15	9	10	11.3333
263577	chr16	20775177	20776937	ACSM3	chr16	21305384	21314374	6	6	3	5
143647	chr12	7455402	7459564	ACSM4	chr12	7459871	7460634	504	185	162	283.667
410693	chr20	25036380	25043735	ACSS1	chr20	25025110	25026142	354	229	192	258.333
410693	chr20	25036380	25043735	ACSS1	chr20	25176862	25187578	32	30	33	31.6667
410693	chr20	25036380	25043735	ACSS1	chr20	25377813	25394460	34	19	25	26
411846	chr20	33452578	33468129	ACSS2	chr20	33469650	33470764	109	64	38	70.3333
58667	chr1	229562492	229571968	ACTA1	chr1	229558678	229578071	245	203	130	192.667
89679	chr10	90751013	90752197	ACTA2	chr10	89873045	89876597	11	6	8	8.33333
89679	chr10	90751013	90752197	ACTA2	chr10	90748291	90748853	435	321	221	325.667
89679	chr10	90751013	90752197	ACTA2	chr10	90873795	90881917	42	27	20	29.6667
89679	chr10	90751013	90752197	ACTA2	chr10	90978257	90990846	57	41	23	40.3333
89679	chr10	90751013	90752197	ACTA2	chr10	91322414	91327975	7	15	12	11.3333
572382	chr5	56777073	56779944	ACTBL2	chr5	56780341	56782306	476	171	166	271
297383	chr17	79477581	79481510	ACTG1	chr17	79458958	79476197	142	122	83	115.667
353783	chr2	74117980	74121856	ACTG2	chr2	74123888	74138022	504	178	199	293.667
491008	chr3	179278890	179288214	ACTL6A	chr3	178731651	178745721	4	3	4	3.66667
491008	chr3	179278890	179288214	ACTL6A	chr3	179131033	179136883	19	13	10	14
491008	chr3	179278890	179288214	ACTL6A	chr3	179289235	179290116	286	93	104	161
778003	chr9	111622012	111628859	ACTL7A	chr9	111631182	111641389	481	114	155	250
778002	chr9	111613777	111622011	ACTL7B	chr9	111628860	111631181	210	117	111	146
3783	chr1	18080410	18082292	ACTL8	chr1	18089207	18090853	102	81	63	82
60733	chr1	236840537	236853707	ACTN2	chr1	235640520	235659754	5	2	4	3.66667
60733	chr1	236840537	236853707	ACTN2	chr1	236833141	236838968	220	175	212	202.333
222305	chr14	58662860	58667225	ACTR10	chr14	58661420	58671035	59	95	51	68.3333
93543	chr10	104261258	104262550	ACTR1A	chr10	103988665	103997527	18	35	18	23.6667
93543	chr10	104261258	104262550	ACTR1A	chr10	104257768	104258690	450	412	267	376.333
359466	chr2	98279112	98286492	ACTR1B	chr2	98289637	98301472	437	78	74	196.333
351318	chr2	65452489	65459470	ACTR2	chr2	65465062	65468870	259	107	117	161
351318	chr2	65452489	65459470	ACTR2	chr2	65655338	65666824	35	12	15	20.6667
364107	chr2	114645986	114651473	ACTR3	chr2	113870950	113881798	10	5	5	6.66667
364107	chr2	114645986	114651473	ACTR3	chr2	114643069	114644385	739	370	394	501
705599	chr7	152450889	152457916	ACTR3B	chr7	152012535	152022066	53	22	36	37
705599	chr7	152450889	152457916	ACTR3B	chr7	152458249	152459327	821	456	426	567.667
172361	chr12	100584952	100596174	ACTR6	chr12	100961335	100962648	35	23	13	23.6667
452582	chr3	53915522	53924632	ACTR8	chr3	53377292	53380621	32	30	24	28.6667
452582	chr3	53915522	53924632	ACTR8	chr3	53641347	53647189	24	9	15	16
452582	chr3	53915522	53924632	ACTR8	chr3	53924647	53925185	759	355	448	520.667
487	chr1	2927637	2944794	ACTRT2	chr1	2923852	2925227	509	232	246	329
487	chr1	2927637	2944794	ACTRT2	chr1	3339940	3343969	37	33	19	29.6667
377870	chr2	158732161	158733757	ACVR1	chr2	158162013	158173218	20	12	8	13.3333
377870	chr2	158732161	158733757	ACVR1	chr2	158319895	158339655	20	15	23	19.3333
377870	chr2	158732161	158733757	ACVR1	chr2	158724540	158736016	213	155	127	165
157077	chr12	52337237	52351584	ACVR1B	chr12	52352802	52353277	61	46	63	56.6667
377790	chr2	158474399	158485896	ACVR1C	chr2	158162013	158173218	22	6	7	11.6667
377790	chr2	158474399	158485896	ACVR1C	chr2	158487433	158488112	374	137	182	231
374564	chr2	148599900	148603822	ACVR2A	chr2	148303729	148317907	25	19	29	24.3333
374564	chr2	148599900	148603822	ACVR2A	chr2	148387964	148401273	62	28	22	37.3333
374564	chr2	148599900	148603822	ACVR2A	chr2	148592629	148595657	350	181	112	214.333
374564	chr2	148599900	148603822	ACVR2A	chr2	149292948	149302605	12	7	8	9
374564	chr2	148599900	148603822	ACVR2A	chr2	149395953	149400623	11	8	12	10.3333
448626	chr3	38487578	38496689	ACVR2B	chr3	38501422	38513113	60	10	38	36
121775	chr11	67417569	67429735	ACY3	chr11	67431098	67438454	214	102	111	142.333
227286	chr14	75534123	75537115	ACYP1	chr14	74409280	74414285	8	5	7	6.66667
227286	chr14	75534123	75537115	ACYP1	chr14	75530876	75532729	866	570	446	627.333
347868	chr2	54339451	54349206	ACYP2	chr2	53997660	54002081	29	13	9	17
347868	chr2	54339451	54349206	ACYP2	chr2	54195058	54201716	47	18	15	26.6667
347868	chr2	54339451	54349206	ACYP2	chr2	54548499	54559253	23	7	15	15
347868	chr2	54339451	54349206	ACYP2	chr2	54885565	54896953	21	13	21	18.3333
327676	chr19	36065800	36067544	AD000090.1	chr19	36061677	36064671	71	71	48	63.3333
327667	chr19	36033658	36039398	AD000090.2	chr19	36041759	36047212	274	280	141	231.667
327756	chr19	36598109	36616321	AD001527.1	chr19	36624937	36638009	73	66	38	59
414361	chr20	43276192	43283807	ADA	chr20	43283892	43290243	351	196	188	245
414361	chr20	43276192	43283807	ADA	chr20	43503620	43521586	22	9	14	15
533728	chr4	123295978	123300136	ADAD1	chr4	123303556	123317673	189	27	19	78.3333
277590	chr16	84221012	84225814	ADAD2	chr16	84756898	84774929	7	3	3	4.33333
277590	chr16	84221012	84225814	ADAD2	chr16	85342002	85357599	8	3	4	5
246874	chr15	59040631	59042709	ADAM10	chr15	58431869	58441672	37	31	28	32
246874	chr15	59040631	59042709	ADAM10	chr15	58526160	58544230	55	30	31	38.6667
246874	chr15	59040631	59042709	ADAM10	chr15	58621964	58627687	40	41	28	36.3333
246874	chr15	59040631	59042709	ADAM10	chr15	59032302	59034211	599	396	348	447.667
288124	chr17	42832618	42839130	ADAM11	chr17	42827706	42832205	76	45	37	52.6667
100589	chr10	128070588	128077489	ADAM12	chr10	127664651	127672882	26	10	16	17.3333
334707	chr2	9689098	9699428	ADAM17	chr2	8966860	8972227	6	5	3	4.66667
718773	chr8	39440950	39442904	ADAM18	chr8	39208615	39217362	10	9	6	8.33333
718773	chr8	39440950	39442904	ADAM18	chr8	39434694	39437796	243	141	101	161.667
603664	chr5	156995435	157004260	ADAM19	chr5	156690081	156696776	21	17	16	18
603664	chr5	156995435	157004260	ADAM19	chr5	157007628	157019730	320	211	244	258.333
718854	chr8	39692762	39698179	ADAM2	chr8	39684995	39690442	242	69	104	138.333
226000	chr14	70998144	71002275	ADAM20	chr14	70995565	70996869	135	55	40	76.6667
686488	chr7	87561215	87565620	ADAM22	chr7	87567907	87569692	80	21	21	40.6667
393191	chr2	207305427	207314172	ADAM23	chr2	207320209	207324414	164	57	45	88.6667
393191	chr2	207305427	207314172	ADAM23	chr2	208278006	208289928	6	4	2	4
714304	chr8	24142017	24152269	ADAM28	chr8	24129594	24136394	38	22	21	27
33335	chr1	120431471	120440812	ADAM30	chr1	120444241	120448469	630	216	262	369.333
718616	chr8	38962142	38967986	ADAM32	chr8	38956180	38961990	228	62	95	128.333
404269	chr20	3661351	3674501	ADAM33	chr20	3697321	3709918	15	20	22	19
714348	chr8	24297853	24300033	ADAM7	chr8	24292420	24303992	580	183	177	313.333
714331	chr8	24238062	24251886	ADAMDEC1	chr8	24103748	24115907	24	28	20	24
714331	chr8	24238062	24251886	ADAMDEC1	chr8	24253345	24255134	197	86	85	122.667
423843	chr21	28214457	28218321	ADAMTS1	chr21	28211715	28223186	368	226	245	279.667
423843	chr21	28214457	28218321	ADAMTS1	chr21	28933464	28942833	22	14	11	15.6667
565411	chr5	33890114	33892962	ADAMTS12	chr5	33894702	33901917	456	383	299	379.333
140331	chr11	130316168	130326205	ADAMTS15	chr11	130330692	130333149	322	153	147	207.333
140331	chr11	130316168	130326205	ADAMTS15	chr11	130511795	130525535	28	14	14	18.6667
140331	chr11	130316168	130326205	ADAMTS15	chr11	130719667	130729393	75	55	33	54.3333
258385	chr15	100880331	100885379	ADAMTS17	chr15	100460399	100478628	16	11	9	12
258385	chr15	100880331	100885379	ADAMTS17	chr15	100891244	100891546	66	66	42	58
258385	chr15	100880331	100885379	ADAMTS17	chr15	101110300	101114998	25	63	36	41.3333
258385	chr15	100880331	100885379	ADAMTS17	chr15	101407914	101424749	7	11	6	8
275710	chr16	77464853	77472366	ADAMTS18	chr16	77456906	77475866	505	87	181	257.667
595462	chr5	128791627	128798272	ADAMTS19	chr5	128798774	128811639	409	93	138	213.333
609982	chr5	178767617	178777381	ADAMTS2	chr5	178778518	178786443	310	171	143	208
154827	chr12	43942186	43950458	ADAMTS20	chr12	43932310	43934180	165	41	61	89
423900	chr21	28335109	28341607	ADAMTS5	chr21	28330224	28347130	460	122	146	242.667
423900	chr21	28335109	28341607	ADAMTS5	chr21	28630358	28646381	13	2	3	6
423900	chr21	28335109	28341607	ADAMTS5	chr21	29594885	29607149	11	13	8	10.6667
575102	chr5	64777556	64778174	ADAMTS6	chr5	63926209	63943936	15	16	8	13
575102	chr5	64777556	64778174	ADAMTS6	chr5	64105189	64109332	41	19	31	30.3333
575102	chr5	64777556	64778174	ADAMTS6	chr5	64257587	64266696	19	26	13	19.3333
140327	chr11	130296757	130307018	ADAMTS8	chr11	130071682	130087735	26	15	17	19.3333
140327	chr11	130296757	130307018	ADAMTS8	chr11	130307035	130316167	252	105	126	161
140327	chr11	130296757	130307018	ADAMTS8	chr11	130486104	130494781	25	11	16	17.3333
140327	chr11	130296757	130307018	ADAMTS8	chr11	130729394	130731663	181	110	113	134.667
140327	chr11	130296757	130307018	ADAMTS8	chr11	131533818	131543436	4	7	3	4.66667
455872	chr3	64672693	64676281	ADAMTS9	chr3	64677632	64681656	440	225	187	284
455827	chr3	64546185	64548376	ADAMTS9-AS1	chr3	64544110	64552511	659	210	251	373.333
756352	chr9	18473002	18476310	ADAMTSL1	chr9	18467358	18479182	440	196	190	275.333
784338	chr9	136395933	136408466	ADAMTSL2	chr9	136391995	136392687	134	136	106	125.333
784338	chr9	136395933	136408466	ADAMTSL2	chr9	136858311	136862758	4	4	5	4.33333
35488	chr1	150501621	150544031	ADAMTSL4	chr1	150545578	150547832	415	281	168	288
661950	chr7	992498	1000005	ADAP1	chr7	1004237	1006587	318	411	251	326.667
428918	chr21	46491229	46496124	ADARB1	chr21	46484355	46501432	654	363	425	480.667
64829	chr10	1779435	1780609	ADARB2	chr10	1783018	1785357	541	271	203	338.333
275174	chr16	75655746	75664032	ADAT1	chr16	75664405	75674700	86	50	46	60.6667
653761	chr6	143766881	143775109	ADAT2	chr6	143758382	143764172	457	80	175	237.333
227962	chr14	78254385	78275373	ADCK1	chr14	77917755	77930417	5	6	3	4.66667
227962	chr14	78254385	78275373	ADCK1	chr14	78282927	78283606	37	18	16	23.6667
702203	chr7	140366555	140392221	ADCK2	chr7	140394467	140394772	125	52	28	68.3333
58065	chr1	227085018	227088371	ADCK3	chr1	227081717	227084916	241	166	125	177.333
328606	chr19	41215027	41238732	ADCK4	chr19	41199075	41201543	130	74	82	95.3333
675016	chr7	45604128	45619671	ADCY1	chr7	45596746	45601938	193	94	92	126.333
40189	chr1	167883044	167896876	ADCY10	chr1	167876182	167882689	182	72	141	131.667
557337	chr5	7394055	7399507	ADCY2	chr5	6760597	6770156	13	9	12	11.3333
557337	chr5	7394055	7399507	ADCY2	chr5	7390950	7404684	457	188	153	266
339201	chr2	25138835	25146662	ADCY3	chr2	25149728	25156397	545	218	141	301.333
156352	chr12	49174578	49186511	ADCY6	chr12	49166920	49168684	102	84	92	92.6667
268146	chr16	50300258	50315102	ADCY7	chr16	50770155	50775526	4	5	3	4
746873	chr8	132053643	132056079	ADCY8	chr8	132048636	132050513	259	142	136	179
746873	chr8	132053643	132056079	ADCY8	chr8	132811658	132815090	18	31	20	23
259473	chr16	4163681	4169290	ADCY9	chr16	4170250	4170554	405	388	280	357.667
297908	chr18	902775	912992	ADCYAP1	chr18	899139	902109	316	48	57	140.333
670820	chr7	31088446	31093505	ADCYAP1R1	chr7	31077966	31085232	118	172	161	150.333
496970	chr4	2844877	2846675	ADD1	chr4	2839735	2840272	493	505	342	446.667
352942	chr2	70990316	71000235	ADD2	chr2	70986375	70989372	737	190	225	384
95825	chr10	111752628	111756722	ADD3	chr10	111752131	111752335	173	117	66	118.667
526198	chr4	100200869	100212365	ADH1A	chr4	100213717	100219569	168	84	44	98.6667
526206	chr4	100235295	100243840	ADH1B	chr4	100248060	100250858	79	29	36	48
526161	chr4	100076553	100084184	ADH4	chr4	100067059	100074036	344	67	139	183.333
526161	chr4	100076553	100084184	ADH4	chr4	100372617	100389429	9	5	4	6
526146	chr4	100009667	100017455	ADH5	chr4	99171385	99178855	12	4	6	7.33333
526146	chr4	100009667	100017455	ADH5	chr4	99994888	99998910	84	25	45	51.3333
526179	chr4	100139788	100144021	ADH6	chr4	98995804	99012787	12	3	5	6.66667
526179	chr4	100139788	100144021	ADH6	chr4	100136674	100137459	596	259	295	383.333
526238	chr4	100351444	100357284	ADH7	chr4	100360636	100362023	176	136	122	144.667
412663	chr20	37209070	37215447	ADIG	chr20	37199025	37202566	149	86	75	103.333
412663	chr20	37209070	37215447	ADIG	chr20	37653218	37670433	3	3	2	2.66667
493062	chr3	186559823	186565414	ADIPOQ	chr3	186339040	186346949	38	16	16	23.3333
493062	chr3	186559823	186565414	ADIPOQ	chr3	186551177	186556396	446	149	128	241
493062	chr3	186559823	186565414	ADIPOQ	chr3	186862812	186881833	78	19	29	42
493064	chr3	186571165	186574227	ADIPOQ-AS1	chr3	186343436	186351298	15	14	9	12.6667
493064	chr3	186571165	186574227	ADIPOQ-AS1	chr3	186578497	186590077	160	96	66	107.333
51050	chr1	202926054	202928210	ADIPOR1	chr1	202921995	202933958	293	380	284	319
51050	chr1	202926054	202928210	ADIPOR1	chr1	203261892	203268403	12	17	7	12
142182	chr12	1796050	1798892	ADIPOR2	chr12	1094724	1095908	10	8	4	7.33333
142182	chr12	1796050	1798892	ADIPOR2	chr12	2038340	2049082	38	19	22	26.3333
415839	chr20	49544877	49556960	ADNP	chr20	49926179	49944021	4	2	6	4
320405	chr18	77863651	77867865	ADNP2	chr18	76813507	76818893	7	7	7	7
320405	chr18	77863651	77867865	ADNP2	chr18	77855561	77858112	367	173	125	221.667
82244	chr10	64562869	64568265	ADO	chr10	64379940	64398958	127	62	38	75.6667
82244	chr10	64562869	64568265	ADO	chr10	64569473	64577024	970	337	356	554.333
82244	chr10	64562869	64568265	ADO	chr10	65465282	65471745	13	7	14	11.3333
430980	chr22	24813221	24822908	ADORA2A	chr22	24810680	24813094	244	184	140	189.333
282480	chr17	15845336	15851234	ADORA2B	chr17	15837979	15843689	200	150	117	155.667
30800	chr1	112101231	112106609	ADORA3	chr1	112098454	112100497	374	58	53	161.667
250787	chr15	73072205	73077870	ADPGK	chr15	72556728	72561390	13	10	6	9.66667
250787	chr15	73072205	73077870	ADPGK	chr15	73061522	73080527	560	315	135	336.667
250787	chr15	73072205	73077870	ADPGK	chr15	73360276	73366430	18	15	11	14.6667
250787	chr15	73072205	73077870	ADPGK	chr15	73566982	73581694	15	12	10	12.3333
209974	chr13	114106930	114111600	ADPRHL1	chr13	114114054	114116204	303	140	160	201
715040	chr8	26720502	26726075	ADRA1A	chr8	26716889	26732103	453	163	153	256.333
604427	chr5	159341749	159345488	ADRA1B	chr5	158590787	158600158	25	6	12	14.3333
604427	chr5	159341749	159345488	ADRA1B	chr5	158738565	158740131	22	16	9	15.6667
604427	chr5	159341749	159345488	ADRA1B	chr5	159334774	159350903	781	281	238	433.333
404364	chr20	4223812	4231069	ADRA1D	chr20	3627643	3639447	5	6	6	5.66667
404364	chr20	4223812	4231069	ADRA1D	chr20	4239389	4239664	110	126	81	105.667
404364	chr20	4223812	4231069	ADRA1D	chr20	4563950	4576091	60	36	31	42.3333
96169	chr10	112832585	112839323	ADRA2A	chr10	112080596	112086002	7	7	9	7.66667
96169	chr10	112832585	112839323	ADRA2A	chr10	112827887	112843215	532	182	108	274
359095	chr2	96780361	96788417	ADRA2B	chr2	97178020	97196240	8	6	8	7.33333
601068	chr5	148201249	148211066	ADRB2	chr5	147176209	147187883	21	8	7	12
601068	chr5	148201249	148211066	ADRB2	chr5	147304735	147310772	6	10	4	6.66667
601068	chr5	148201249	148211066	ADRB2	chr5	147566442	147568725	27	10	17	18
601068	chr5	148201249	148211066	ADRB2	chr5	148510102	148520757	14	4	19	12.3333
121719	chr11	67024509	67039529	ADRBK1	chr11	67018839	67019225	135	90	76	100.333
418861	chr20	60871672	60890793	ADRM1	chr20	60869146	60870544	769	375	363	502.333
434750	chr22	40737045	40748584	ADSL	chr22	40724846	40729999	243	104	108	151.667
63154	chr1	244611695	244618371	ADSS	chr1	244607354	244608911	467	55	64	195.333
63154	chr1	244611695	244618371	ADSS	chr1	245000254	245013793	8	7	6	7
63154	chr1	244611695	244618371	ADSS	chr1	245204832	245224303	13	6	9	9.33333
235521	chr14	105182641	105202200	ADSSL1	chr14	104189524	104199971	3	4	6	4.33333
235521	chr14	105182641	105202200	ADSSL1	chr14	105174366	105178816	138	119	127	128
211035	chr14	22246534	22249896	AE000659.2	chr14	22251151	22253982	445	177	158	260
211135	chr14	22608940	22611263	AE000660.1	chr14	22602906	22621324	291	90	118	166.333
211257	chr14	23021261	23030340	AE000662.92	chr14	23014172	23033077	292	166	142	200
211257	chr14	23021261	23030340	AE000662.92	chr14	23318455	23329273	47	27	35	36.3333
147371	chr12	19554993	19562051	AEBP2	chr12	19544211	19552158	16	14	11	13.6667
255056	chr15	89161102	89174277	AEN	chr15	89152635	89154318	294	155	162	203.667
320806	chr19	3059842	3068607	AES	chr19	3073324	3080512	512	369	335	405.333
227345	chr14	75751241	75761416	AF111167.1	chr14	75598587	75607881	72	34	39	48.3333
227345	chr14	75751241	75761416	AF111167.1	chr14	75765010	75769817	165	182	135	160.667
227853	chr14	77870133	77872885	AF111168.2	chr14	77880010	77882505	99	35	28	54
424597	chr21	30560019	30560474	AF124730.4	chr21	30561908	30566021	900	382	216	499.333
420240	chr21	16332529	16333937	AF127577.10	chr21	16334928	16335543	695	217	206	372.667
420240	chr21	16332529	16333937	AF127577.10	chr21	16849494	16859679	24	16	21	20.3333
420248	chr21	16342253	16344136	AF127577.11	chr21	16337717	16340171	378	248	247	291
420248	chr21	16342253	16344136	AF127577.11	chr21	16856888	16860192	37	26	21	28
420220	chr21	16288744	16292273	AF127577.8	chr21	16283250	16285866	138	45	35	72.6667
420220	chr21	16288744	16292273	AF127577.8	chr21	16849494	16857748	7	7	5	6.33333
424564	chr21	30431527	30435396	AF129075.5	chr21	30421736	30426899	366	126	130	207.333
424564	chr21	30431527	30435396	AF129075.5	chr21	30737015	30740305	47	27	17	30.3333
710406	chr8	10963469	10968690	AF131215.2	chr8	10958342	10963245	270	139	68	159
710416	chr8	10993657	10996630	AF131215.4	chr8	10998454	11009229	220	49	47	105.333
710393	chr8	10924507	10927347	AF131215.6	chr8	10923465	10924146	409	266	251	308.667
710393	chr8	10924507	10927347	AF131215.6	chr8	11208973	11215253	8	4	5	5.66667
710502	chr8	11203058	11208972	AF131216.5	chr8	11212437	11214763	261	121	103	161.667
710494	chr8	11180600	11183225	AF131216.6	chr8	11172976	11185480	259	155	88	167.333
741958	chr8	116520070	116523103	AF178030.2	chr8	116526491	116528204	684	215	236	378.333
741958	chr8	116520070	116523103	AF178030.2	chr8	117458306	117473688	18	7	8	11
750394	chr8	145923812	145927598	AF186192.1	chr8	145921443	145933383	169	128	79	125.333
799278	chrX	48935142	48938502	AF196779.12	chrX	48932158	48933705	71	54	61	62
527252	chr4	103485281	103488948	AF213884.1	chr4	103480638	103484966	557	281	234	357.333
527252	chr4	103485281	103488948	AF213884.1	chr4	103924172	103934453	44	13	18	25
747378	chr8	133692199	133696311	AF216667.1	chr8	133689796	133692008	724	284	282	430
747439	chr8	133852946	133856865	AF230666.2	chr8	133857643	133858255	253	130	126	169.667
747439	chr8	133852946	133856865	AF230666.2	chr8	134464639	134471688	13	9	13	11.6667
601213	chr5	148647907	148653737	AFAP1L1	chr5	147819472	147826110	7	5	5	5.66667
601213	chr5	148647907	148653737	AFAP1L1	chr5	148100525	148118525	14	7	7	9.33333
601213	chr5	148647907	148653737	AFAP1L1	chr5	148516320	148530171	66	50	50	55.3333
601213	chr5	148647907	148653737	AFAP1L1	chr5	148646092	148661812	465	190	165	273.333
601213	chr5	148647907	148653737	AFAP1L1	chr5	148959078	148977605	14	11	7	10.6667
97174	chr10	116161016	116179427	AFAP1L2	chr10	116157112	116157301	247	158	138	181
522203	chr4	87852276	87859763	AFF1	chr4	87277303	87279304	16	7	11	11.3333
522203	chr4	87852276	87859763	AFF1	chr4	87421329	87434854	17	16	13	15.3333
522203	chr4	87852276	87859763	AFF1	chr4	87844987	87848355	554	189	253	332
522203	chr4	87852276	87859763	AFF1	chr4	88311665	88316610	15	3	9	9
360136	chr2	100753103	100763289	AFF3	chr2	100764234	100767918	104	34	33	57
596504	chr5	132297911	132300277	AFF4	chr5	132291028	132296280	273	144	125	180.667
596504	chr5	132297911	132300277	AFF4	chr5	133308859	133328503	2	4	2	2.66667
301394	chr18	12369217	12378670	AFG3L2	chr18	12364635	12367540	638	218	226	360.667
301394	chr18	12369217	12378670	AFG3L2	chr18	12946014	12946967	21	6	16	14.3333
517715	chr4	74344675	74351527	AFM	chr4	74344174	74360580	35	35	37	35.6667
517700	chr4	74294117	74296951	AFP	chr4	74286847	74300984	310	184	129	207.667
351123	chr2	64750059	64756237	AFTPH	chr2	64761935	64778845	200	115	134	149.667
351123	chr2	64750059	64756237	AFTPH	chr2	65087476	65091844	40	17	21	26
551507	chr4	178359092	178367324	AGA	chr4	177235752	177254186	10	2	7	6.33333
551507	chr4	178359092	178367324	AGA	chr4	178367394	178377343	204	49	56	103
401923	chr2	236397749	236406215	AGAP1	chr2	236407247	236411329	392	191	169	250.667
158477	chr12	58134516	58138608	AGAP2	chr12	58125392	58141111	324	234	176	244.667
705199	chr7	150782321	150785672	AGAP3	chr7	149408500	149411157	9	21	10	13.3333
705199	chr7	150782321	150785672	AGAP3	chr7	150061093	150063036	25	39	30	31.3333
705199	chr7	150782321	150785672	AGAP3	chr7	150766536	150771667	242	305	159	235.333
78036	chr10	51479000	51499439	AGAP7	chr10	51501978	51505079	200	70	77	115.667
254315	chr15	86680950	86687149	AGBL1	chr15	86676736	86680156	365	117	146	209.333
116538	chr11	47731934	47738084	AGBL2	chr11	47738558	47746739	186	143	130	153
700585	chr7	134670203	134673323	AGBL3	chr7	134319884	134329960	29	7	20	18.6667
700585	chr7	134670203	134673323	AGBL3	chr7	134678806	134682138	270	133	74	159
700585	chr7	134670203	134673323	AGBL3	chr7	134838722	134853709	89	42	60	63.6667
700585	chr7	134670203	134673323	AGBL3	chr7	135636932	135653199	4	3	5	4
11496	chr1	50485989	50489923	AGBL4	chr1	50484077	50485675	333	79	93	168.333
339716	chr2	27263510	27279139	AGBL5	chr2	26057347	26070332	4	3	2	3
399753	chr2	228332065	228338268	AGFG1	chr2	228341271	228343352	481	217	193	297
690243	chr7	100135589	100138654	AGFG2	chr7	100144501	100146858	25	24	9	19.3333
578626	chr5	76323564	76325667	AGGF1	chr5	76321497	76329490	154	35	84	91
702456	chr7	141249571	141251912	AGK	chr7	141239849	141247379	286	337	180	267.667
27202	chr1	100313162	100317801	AGL	chr1	100308094	100309536	423	208	170	267
27202	chr1	100313162	100317801	AGL	chr1	100910844	100927802	16	8	11	11.6667
27202	chr1	100313162	100317801	AGL	chr1	101336503	101345614	17	9	8	11.3333
665921	chr7	15600655	15601943	AGMO	chr7	15593945	15599047	597	145	209	317
619832	chr6	32144835	32148799	AGPAT1	chr6	32092230	32094111	116	133	97	115.333
619832	chr6	32144835	32148799	AGPAT1	chr6	33255433	33269486	11	11	8	10
428698	chr21	45280242	45286105	AGPAT3	chr21	44278246	44296793	6	5	4	5
428698	chr21	45280242	45286105	AGPAT3	chr21	45262879	45271750	340	198	150	229.333
659150	chr6	161694042	161695668	AGPAT4	chr6	161535704	161543250	27	49	45	40.3333
659150	chr6	161694042	161695668	AGPAT4	chr6	161691276	161703678	300	342	268	303.333
719375	chr8	41419580	41434997	AGPAT6	chr8	42209160	42228426	12	7	7	8.66667
521076	chr4	84447588	84463441	AGPAT9	chr4	84544694	84553578	24	15	25	21.3333
521076	chr4	84447588	84463441	AGPAT9	chr4	85424113	85441318	5	8	3	5.33333
384020	chr2	178255995	178260243	AGPS	chr2	178029667	178033789	35	31	27	31
384020	chr2	178255995	178260243	AGPS	chr2	178260837	178262804	154	85	63	100.667
384020	chr2	178255995	178260243	AGPS	chr2	178619233	178621310	9	5	4	6
666324	chr7	16872902	16878949	AGR2	chr7	16457815	16474525	13	3	8	8
666324	chr7	16872902	16878949	AGR2	chr7	16880177	16882512	576	187	259	340.667
666324	chr7	16872902	16878949	AGR2	chr7	17369192	17380227	25	4	11	13.3333
666340	chr7	16921524	16923584	AGR3	chr7	16910878	16921478	202	183	173	186
273135	chr16	67515357	67517762	AGRP	chr16	67530460	67540727	114	114	73	100.333
59037	chr1	230849236	230855684	AGT	chr1	230859983	230860778	211	92	101	134.667
59037	chr1	230849236	230855684	AGT	chr1	231315368	231328856	7	8	4	6.33333
771392	chr9	88355594	88357369	AGTPBP1	chr9	88353112	88355060	201	246	113	186.667
771392	chr9	88355594	88357369	AGTPBP1	chr9	88557188	88561854	11	17	20	16
771392	chr9	88355594	88357369	AGTPBP1	chr9	88676937	88681333	11	4	8	7.66667
771392	chr9	88355594	88357369	AGTPBP1	chr9	88949320	88966991	7	14	12	11
481097	chr3	148413140	148417483	AGTR1	chr3	148417829	148425312	198	56	48	100.667
818498	chrX	115292344	115307003	AGTR2	chrX	115314971	115322120	59	15	25	33
403198	chr2	241805877	241821881	AGXT	chr2	241830258	241831068	123	86	69	92.6667
565790	chr5	35043586	35051674	AGXT2	chr5	35042324	35057237	173	118	77	122.667
529297	chr4	109679489	109686848	AGXT2L1	chr4	109687457	109692651	344	124	175	214.333
609754	chr5	177653649	177662160	AGXT2L2	chr5	177648064	177651879	97	89	50	78.6667
609754	chr5	177653649	177662160	AGXT2L2	chr5	177908176	177918542	7	15	7	9.66667
609754	chr5	177653649	177662160	AGXT2L2	chr5	178018758	178027818	13	25	8	15.3333
63845	chr1	247094208	247098686	AHCTF1	chr1	247102731	247115739	304	142	131	192.333
63845	chr1	247094208	247098686	AHCTF1	chr1	247482600	247490986	26	26	12	21.3333
63845	chr1	247094208	247098686	AHCTF1	chr1	247647821	247658016	35	26	10	23.6667
63845	chr1	247094208	247098686	AHCTF1	chr1	248016589	248025768	8	5	5	6
30311	chr1	110522706	110534653	AHCYL1	chr1	110314004	110328475	68	36	32	45.3333
30311	chr1	110522706	110534653	AHCYL1	chr1	110543234	110550201	177	108	78	121
6008	chr1	27928426	27931673	AHDC1	chr1	27924668	27927978	64	120	60	81.3333
651295	chr6	135826331	135834228	AHI1	chr6	135818167	135824695	8	19	20	15.6667
120801	chr11	62320337	62328425	AHNAK	chr11	61981444	61984848	12	18	9	13
120801	chr11	62320337	62328425	AHNAK	chr11	62337078	62340421	584	413	347	448
666461	chr7	17333329	17339625	AHR	chr7	16462079	16468793	6	2	3	3.66667
666461	chr7	17333329	17339625	AHR	chr7	17032619	17039950	146	36	34	72
666461	chr7	17333329	17339625	AHR	chr7	17327299	17342956	345	191	202	246
555463	chr5	301198	312667	AHRR	chr5	902176	902402	8	10	13	10.3333
227866	chr14	77922017	77926065	AHSA1	chr14	77918170	77930417	419	164	137	240
227866	chr14	77922017	77926065	AHSA1	chr14	78174606	78181490	30	19	24	24.3333
493004	chr3	186329664	186335561	AHSG	chr3	185691145	185707398	18	14	19	17
[truncated: 27,471 more rows]
